# Supplementary material for: The prevalence and predictors of experiences of beauty in 22 countries: An international assessment of aesthetic appreciation in the Global Flourishing Study
Source: Research Square preprint supplement (doi:10.21203/rs.3.rs-7697881/v1), 2025-10-10
Supplement: Supplementary file [file 7518999de4144e2b3e301062.pdf]

## **(Online Supplement**

### **Important notes and caveats of results.**

This online supplement to the Global Flourishing Study report on beauty has several important caveats to interpretation. Estimating the within country group proportion can be unstable if the group size is small ( $<1\%$ ) of the country sample size. In such cases, the uncertainty in the estimate leads to a multiple imputation adjusted degrees of freedom less than 1. This means there is not enough information to evaluate the uncertainty in the estimate. We flagged such cases with a “\*”.

**Table S1a. Argentina: Demographic descriptive statistics**

| <b>Characteristic</b>                    | <b>N = 2,728<sup>1</sup></b> |
|------------------------------------------|------------------------------|
| <b>Age group</b>                         |                              |
| 1943 or earlier (current age: 80+ years) | 50 (1.8%)                    |
| 1943-1953 (current age: 70-79 years)     | 156 (5.7%)                   |
| 1953-1963 (current age: 60-69 years)     | 289 (11%)                    |
| 1963-1973 (current age: 50-59 years)     | 459 (17%)                    |
| 1973-1983 (current age: 40-49 years)     | 537 (20%)                    |
| 1983-1993 (current age: 30-39 years)     | 557 (20%)                    |
| 1993-1998 (current age: 25-29 years)     | 259 (9.5%)                   |
| 1998-2005 (current age: 18-24 years)     | 422 (15%)                    |
| (Missing)                                | 0 (0%)                       |
| <b>Gender</b>                            |                              |
| 1. Male                                  | 1,290 (47%)                  |
| 2. Female                                | 1,426 (52%)                  |
| 3. Other                                 | 5 (0.2%)                     |
| (Missing)                                | 7 (0.3%)                     |
| <b>Marital status</b>                    |                              |
| 1. Single/Never been married             | 993 (36%)                    |
| 2. Married                               | 631 (23%)                    |
| 3. Separated                             | 172 (6.3%)                   |
| 4. Divorced                              | 124 (4.5%)                   |
| 5. Widowed                               | 189 (6.9%)                   |
| 6. Domestic partner                      | 608 (22%)                    |
| (Missing)                                | 11 (0.4%)                    |
| <b>Employment</b>                        |                              |
| 1. Employed for an employer              | 896 (33%)                    |
| 2. Self-employed                         | 788 (29%)                    |
| 3. Retired                               | 341 (13%)                    |
| 4. Student                               | 161 (5.9%)                   |
| 5. Homemaker                             | 256 (9.4%)                   |
| 6. Unemployed and looking for a job      | 222 (8.1%)                   |
| 7. None of these/Other                   | 59 (2.2%)                    |
| (Missing)                                | 4 (0.1%)                     |
| <b>Religious service attendance</b>      |                              |
| 1. More than once a week                 | 207 (7.6%)                   |
| 2. Once a week                           | 310 (11%)                    |
| 3. One to three times a month            | 160 (5.9%)                   |
| 4. A few times a year                    | 830 (30%)                    |
| 5. Never                                 | 1,216 (45%)                  |
| (Missing)                                | 5 (0.2%)                     |
| <b>Education</b>                         |                              |
| 1. Up to 8                               | 835 (31%)                    |
| 2. 9-15                                  | 1,627 (60%)                  |
| 3. 16+                                   | 265 (9.7%)                   |
| (Missing)                                | 1 (<0.1%)                    |
| <b>Immigration</b>                       |                              |
| 1. Born in this country                  | 2,612 (96%)                  |

| <b>Characteristic</b>                                       | <b>N = 2,728<sup>1</sup></b> |
|-------------------------------------------------------------|------------------------------|
| 2. Born in another country                                  | 113 (4.2%)                   |
| (Missing)                                                   | 3 (<0.1%)                    |
| <b>Religious affiliation</b>                                |                              |
| 1. Christianity                                             | 2,050 (75%)                  |
| 10. Taoism                                                  | 0 (0%)                       |
| 11. Confucianism                                            | 0 (0%)                       |
| 12. Primal, Animist, or Folk religion                       | 3 (<0.1%)                    |
| 13. Spiritism                                               | 0 (0%)                       |
| 14. Umbanda, Candomblé, and other African-derived religions | 0 (0%)                       |
| 15. Chinese folk/traditional religion                       | 0 (0%)                       |
| 2. Islam                                                    | 1 (<0.1%)                    |
| 3. Hinduism                                                 | 1 (<0.1%)                    |
| 4. Buddhism                                                 | 21 (0.8%)                    |
| 5. Judaism                                                  | 16 (0.6%)                    |
| 6. Sikhism                                                  | 0 (<0.1%)                    |
| 7. Baha'i                                                   | 0 (0%)                       |
| 8. Jainism                                                  | 0 (0%)                       |
| 9. Shinto                                                   | 0 (0%)                       |
| 96. Some other religion                                     | 45 (1.7%)                    |
| 97. No religion/Atheist/Agnostic                            | 558 (20%)                    |
| (Missing)                                                   | 32 (1.2%)                    |
| <b>RACE ETHNICITY</b>                                       |                              |
| (Missing)                                                   | 177 (6.5%)                   |
| 101. Argentina: Asian                                       | 14 (0.5%)                    |
| 102. Argentina: Black                                       | 21 (0.8%)                    |
| 103. Argentina: Indigenous                                  | 55 (2.0%)                    |
| 104. Argentina: Mestizo(a)                                  | 816 (30%)                    |
| 105. Argentina: Mullato(a)                                  | 29 (1.1%)                    |
| 106. Argentina: White                                       | 1,410 (52%)                  |
| 9995. Prefer not to answer                                  | 151 (5.5%)                   |
| 9996. Other                                                 | 54 (2.0%)                    |

<sup>1</sup>n (%)

**Table S1b. Argentina: Childhood descriptive statistics**

| <b>Characteristic</b>                      | <b>N = 2,728<sup>1</sup></b> |
|--------------------------------------------|------------------------------|
| <b>Age</b>                                 | 43 (17)                      |
| <b>Year of birth</b>                       |                              |
| 1943 or earlier (current age: 80+ years)   | 50 (1.8%)                    |
| 1943-1953 (current age: 70-79 years)       | 156 (5.7%)                   |
| 1953-1963 (current age: 60-69 years)       | 289 (11%)                    |
| 1963-1973 (current age: 50-59 years)       | 459 (17%)                    |
| 1973-1983 (current age: 40-49 years)       | 537 (20%)                    |
| 1983-1993 (current age: 30-39 years)       | 557 (20%)                    |
| 1993-1998 (current age: 25-29 years)       | 259 (9.5%)                   |
| 1998-2005 (current age: 18-24 years)       | 422 (15%)                    |
| (Missing)                                  | 0 (0%)                       |
| <b>Gender</b>                              |                              |
| 1. Male                                    | 1,290 (47%)                  |
| 2. Female                                  | 1,426 (52%)                  |
| 3. Other                                   | 5 (0.2%)                     |
| (Missing)                                  | 7 (0.3%)                     |
| <b>Parent marital status</b>               |                              |
| 1. Parents were married                    | 1,738 (64%)                  |
| 2. Parents were divorced                   | 279 (10%)                    |
| 3. Parents were never married              | 515 (19%)                    |
| 4. One or both of them had died            | 93 (3.4%)                    |
| 5. Unsure                                  | 70 (2.6%)                    |
| (Missing)                                  | 33 (1.2%)                    |
| <b>Age 12 religious service attendance</b> |                              |
| 1. At least once a week                    | 1,043 (38%)                  |
| 2. One to three times a month              | 496 (18%)                    |
| 3. Less than once a month                  | 429 (16%)                    |
| 4. Never                                   | 739 (27%)                    |
| (Missing)                                  | 21 (0.8%)                    |
| <b>Relationship with mother</b>            |                              |
| 1. Very good                               | 1,759 (64%)                  |
| 2. Somewhat good                           | 614 (23%)                    |
| 3. Somewhat bad                            | 133 (4.9%)                   |
| 4. Very bad                                | 97 (3.6%)                    |
| 97. (Does not apply)                       | 109 (4.0%)                   |
| (Missing)                                  | 15 (0.5%)                    |
| <b>Relationship with father</b>            |                              |
| 1. Very good                               | 1,471 (54%)                  |
| 2. Somewhat good                           | 615 (23%)                    |
| 3. Somewhat bad                            | 204 (7.5%)                   |
| 4. Very bad                                | 176 (6.4%)                   |
| 97. (Does not apply)                       | 253 (9.3%)                   |
| (Missing)                                  | 9 (0.3%)                     |
| <b>Outsider growing up</b>                 |                              |
| 1. Yes                                     | 497 (18%)                    |

| <b>Characteristic</b>                                       | <b>N = 2,728<sup>1</sup></b> |
|-------------------------------------------------------------|------------------------------|
| 2. No                                                       | 2,193 (80%)                  |
| (Missing)                                                   | 38 (1.4%)                    |
| <b>Abuse</b>                                                |                              |
| 1. Yes                                                      | 556 (20%)                    |
| 2. No                                                       | 2,141 (78%)                  |
| (Missing)                                                   | 31 (1.1%)                    |
| <b>Self-rated health growing up</b>                         |                              |
| 1. Excellent                                                | 904 (33%)                    |
| 2. Very good                                                | 771 (28%)                    |
| 3. Good                                                     | 772 (28%)                    |
| 4. Fair                                                     | 233 (8.5%)                   |
| 5. Poor                                                     | 48 (1.7%)                    |
| (Missing)                                                   | 1 (<0.1%)                    |
| <b>Immigration status</b>                                   |                              |
| 1. Born in this country                                     | 2,612 (96%)                  |
| 2. Born in another country                                  | 113 (4.2%)                   |
| (Missing)                                                   | 3 (<0.1%)                    |
| <b>Subjective financial status of family growing up</b>     |                              |
| 1. Lived comfortably                                        | 803 (29%)                    |
| 2. Got by                                                   | 925 (34%)                    |
| 3. Found it difficult                                       | 751 (28%)                    |
| 4. Found it very difficult                                  | 239 (8.8%)                   |
| (Missing)                                                   | 9 (0.3%)                     |
| <b>Religious affiliation</b>                                |                              |
| 1. Christianity                                             | 2,403 (88%)                  |
| 10. Taoism                                                  | 2 (<0.1%)                    |
| 11. Confucianism                                            | 0 (0%)                       |
| 12. Primal, Animist, or Folk religion                       | 4 (0.1%)                     |
| 13. Spiritism                                               | 0 (0%)                       |
| 14. Umbanda, Candomblé, and other African-derived religions | 0 (0%)                       |
| 15. Chinese folk/traditional religion                       | 0 (0%)                       |
| 2. Islam                                                    | 0 (<0.1%)                    |
| 3. Hinduism                                                 | 0 (0%)                       |
| 4. Buddhism                                                 | 1 (<0.1%)                    |
| 5. Judaism                                                  | 22 (0.8%)                    |
| 6. Sikhism                                                  | 0 (0%)                       |
| 7. Baha'i                                                   | 0 (0%)                       |
| 8. Jainism                                                  | 0 (0%)                       |
| 9. Shinto                                                   | 0 (0%)                       |
| 96. Some other religion                                     | 7 (0.3%)                     |
| 97. No religion/Atheist/Agnostic                            | 244 (9.0%)                   |
| (Missing)                                                   | 45 (1.6%)                    |
| <b>Race/Ethnicity</b>                                       |                              |
| (Missing)                                                   | 177 (6.5%)                   |
| 101. Argentina: Asian                                       | 14 (0.5%)                    |
| 102. Argentina: Black                                       | 21 (0.8%)                    |
| 103. Argentina: Indigenous                                  | 55 (2.0%)                    |

| <b>Characteristic</b>      | <b>N = 2,728<sup>1</sup></b> |
|----------------------------|------------------------------|
| 104. Argentina: Mestizo(a) | 816 (30%)                    |
| 105. Argentina: Mullato(a) | 29 (1.1%)                    |
| 106. Argentina: White      | 1,410 (52%)                  |
| 9995. Prefer not to answer | 151 (5.5%)                   |
| 9996. Other                | 54 (2.0%)                    |

<sup>1</sup>Mean (SD); n (%)

**Table S1c. Argentina: Proportions by demographic category**

| Variable                     | Category                                 | Proportion | 95% CI         | SE    | p-value  |
|------------------------------|------------------------------------------|------------|----------------|-------|----------|
| Age group                    | 1998-2005 (current age: 18-24 years)     | 0.840      | (0.780, 0.901) | 0.031 | 9.76e-02 |
|                              | 1943 or earlier (current age: 80+ years) | 0.833      | (0.697, 0.970) | 0.067 |          |
|                              | 1943-1953 (current age: 70-79 years)     | 0.759      | (0.656, 0.861) | 0.052 |          |
|                              | 1953-1963 (current age: 60-69 years)     | 0.792      | (0.726, 0.857) | 0.033 |          |
|                              | 1963-1973 (current age: 50-59 years)     | 0.817      | (0.766, 0.868) | 0.026 |          |
|                              | 1973-1983 (current age: 40-49 years)     | 0.811      | (0.767, 0.855) | 0.022 |          |
|                              | 1983-1993 (current age: 30-39 years)     | 0.877      | (0.842, 0.913) | 0.018 |          |
|                              | 1993-1998 (current age: 25-29 years)     | 0.788      | (0.709, 0.866) | 0.040 |          |
|                              | Male                                     | 0.821      | (0.789, 0.852) | 0.016 |          |
|                              | Female                                   | 0.825      | (0.796, 0.854) | 0.015 |          |
| Gender                       | Other                                    | 1.000      | *              | *     | < 1e-16  |
| Marital status               | Single/Never been married                | 0.819      | (0.782, 0.855) | 0.018 |          |
|                              | Divorced                                 | 0.902      | (0.845, 0.959) | 0.029 |          |
|                              | Domestic partner                         | 0.840      | (0.799, 0.882) | 0.021 |          |
|                              | Married                                  | 0.800      | (0.755, 0.845) | 0.023 |          |
|                              | Separated                                | 0.863      | (0.790, 0.936) | 0.037 |          |
|                              | Widowed                                  | 0.783      | (0.696, 0.871) | 0.044 |          |
|                              | Employed for an employer                 | 0.823      | (0.786, 0.860) | 0.019 |          |
| Employment                   | Homemaker                                | 0.790      | (0.713, 0.867) | 0.039 |          |
|                              | None of these/Other                      | 0.763      | (0.610, 0.916) | 0.076 |          |
|                              | Retired                                  | 0.735      | (0.666, 0.805) | 0.035 |          |
|                              | Self-employed                            | 0.881      | (0.850, 0.912) | 0.016 |          |
|                              | Student                                  | 0.855      | (0.776, 0.934) | 0.040 |          |
|                              | Unemployed and looking for a job         | 0.787      | (0.713, 0.861) | 0.038 |          |
|                              | Religious service attendance             |            |                |       |          |
| Religious service attendance | Never                                    | 0.817      | (0.786, 0.847) | 0.016 | 7.30e-01 |
|                              | A few times a year                       | 0.833      | (0.799, 0.868) | 0.018 |          |
|                              | More than once a week                    | 0.836      | (0.757, 0.915) | 0.040 |          |
|                              | Once a week                              | 0.798      | (0.724, 0.872) | 0.038 |          |

| Variable              | Category                                                | Proportion | 95% CI         | SE    | p-value  |
|-----------------------|---------------------------------------------------------|------------|----------------|-------|----------|
| Education             | One to three times a month                              | 0.856      | (0.789, 0.924) | 0.034 | 3.62e-04 |
|                       | 9-15                                                    | 0.838      | (0.816, 0.861) | 0.011 |          |
|                       | 16+                                                     | 0.892      | (0.859, 0.925) | 0.017 |          |
|                       | Up to 8                                                 | 0.772      | (0.720, 0.824) | 0.026 |          |
| Immigration status    | Born in this country                                    | 0.819      | (0.796, 0.842) | 0.012 | 2.98e-05 |
|                       | Born in another country                                 | 0.925      | (0.879, 0.971) | 0.023 |          |
|                       | No                                                      |            |                |       |          |
| Religious affiliation | religion/Atheist/Agnostic                               | 0.844      | (0.803, 0.886) | 0.021 | 3.41e-01 |
|                       | Christianity                                            | 0.816      | (0.790, 0.841) | 0.013 |          |
|                       | Combined                                                | 0.869      | (0.759, 0.980) | 0.056 |          |
|                       | Spiritism                                               | *          | *              | *     |          |
|                       | Umbanda, Candomblé, and other African-derived religions | *          | *              | *     |          |
|                       | Buddhism                                                | *          | *              | *     |          |
|                       | Islam                                                   | *          | *              | *     |          |
|                       | Chinese                                                 |            |                |       |          |
|                       | folk/traditional religion                               | *          | *              | *     |          |
|                       | Hinduism                                                | *          | *              | *     |          |
|                       | Judaism                                                 | *          | *              | *     |          |
|                       | Primal, Animist, or Folk religion                       | *          | *              | *     |          |

**Table S1d. Argentina: Childhood predictors regression analysis**

| Variable                                                        | Category                                                                                                                | Risk-Ratio                       | logRR SE                         | RR 95% CI                                                | Global p-value |
|-----------------------------------------------------------------|-------------------------------------------------------------------------------------------------------------------------|----------------------------------|----------------------------------|----------------------------------------------------------|----------------|
| Relationship with your mother growing up                        | (Ref: Very bad/somewhat bad)<br>Very good/somewhat good                                                                 | 1.045                            | 0.042                            | (0.96,1.13)                                              | 0.342          |
| Relationship with your father growing up                        | (Ref: Very bad/somewhat bad)<br>Very good/somewhat good                                                                 | 1.040                            | 0.035                            | (0.97,1.11)                                              | 0.313          |
| Parents married to each other when you were around 12 years old | (Ref: Parents married)<br>One or both of them had died<br>Parents were divorced<br>Parents were never married<br>Unsure | 0.922<br>1.042<br>1.011<br>0.987 | 0.063<br>0.034<br>0.034<br>0.080 | (0.82,1.04)<br>(0.98,1.11)<br>(0.95,1.08)<br>(0.84,1.16) | 0.519          |
| Feelings about familys household income when growing up         | (Ref: Got by)<br>Found it difficult<br>Found it very difficult<br>Lived comfortably                                     | 0.983<br>0.991<br>1.003          | 0.026<br>0.044<br>0.026          | (0.93,1.03)<br>(0.91,1.08)<br>(0.95,1.05)                | 0.733          |
| Physically or sexually abused when growing up                   | (Ref: No)                                                                                                               | 1.022                            | 0.025                            | (0.97,1.07)                                              | 0.400          |
| Felt like an outsider in your family when growing up            | (Ref: No)<br>Yes                                                                                                        | 1.009                            | 0.031                            | (0.95,1.07)                                              | 0.567          |
| Your health when growing up                                     | (Ref: Good)<br>Excellent<br>Fair<br>Poor<br>Very good                                                                   | 1.033<br>1.033<br>1.004<br>1.060 | 0.028<br>0.044<br>0.086<br>0.029 | (0.98,1.09)<br>(0.95,1.13)<br>(0.85,1.19)<br>(1.00,1.12) | 0.198          |

| Variable                                                                                  | Category                                  | Risk-Ratio | logRR SE | RR 95% CI   | Global p-value |
|-------------------------------------------------------------------------------------------|-------------------------------------------|------------|----------|-------------|----------------|
| Born in This country                                                                      | (Ref: Born in this country)               |            |          |             | 2.75e-04       |
|                                                                                           | Born in another country                   | 1.109      | 0.028    | (1.05,1.17) |                |
| How Often You Attended Religious Services or Worshipped When You Were Around 12 Years Old | (Ref: Never)                              |            |          |             | 0.349          |
|                                                                                           | At least once a week                      | 1.042      | 0.027    | (0.99,1.10) |                |
|                                                                                           | Less than once a month                    | 1.036      | 0.033    | (0.97,1.10) |                |
|                                                                                           | One to three times a month                | 1.016      | 0.033    | (0.95,1.09) |                |
| Year of birth (age group)                                                                 | (Ref: 1998-2005; current age: 18-24)      |            |          |             | 0.696          |
|                                                                                           | 1943 or earlier (current age: 80+ years)  | 1.008      | 0.081    | (0.86,1.18) |                |
|                                                                                           | 1943-1953 (current age: 70-79 years)      | 0.938      | 0.058    | (0.84,1.05) |                |
|                                                                                           | 1953-1963 (current age: 60-69 years)      | 0.965      | 0.048    | (0.88,1.06) |                |
|                                                                                           | 1963-1973 (current age: 50-59 years)      | 0.988      | 0.043    | (0.91,1.08) |                |
|                                                                                           | 1973-1983 (current age: 40-49 years)      | 0.979      | 0.037    | (0.91,1.05) |                |
|                                                                                           | 1983-1993 (current age: 30-39 years)      | 1.041      | 0.038    | (0.97,1.12) |                |
|                                                                                           | 1993-1998 (current age: 25-29 years)      | 0.945      | 0.051    | (0.86,1.04) |                |
| Religion when twelve years old                                                            | (Ref: No religion/Atheist/Agnostic)       |            |          |             | 0.066          |
|                                                                                           | Christianity                              | 0.997      | 0.039    | (0.92,1.08) |                |
|                                                                                           | Collapsed affiliations with prevalence<3% | 1.153      | 0.065    | (1.02,1.31) |                |
| Race plurality (prominent race/ethnic group [0] or not [1])                               | (Ref: Plurality group)                    |            |          |             | 0.226          |
|                                                                                           | Non-plurality groups                      | 1.028      | 0.021    | (0.99,1.07) |                |

**Table S1e. Argentina: Sensitivity to unmeasured confounding of childhood predictors**

| Variable                                                                                 | Category                                                                                                                 | E-value for Estimate         | E-value for 95% CI           |
|------------------------------------------------------------------------------------------|--------------------------------------------------------------------------------------------------------------------------|------------------------------|------------------------------|
| Relationship with your mother growing up                                                 | (Ref: Very bad/somewhat bad)<br>Very good/somewhat good                                                                  | 1.26                         | 1.00                         |
| Relationship with your father growing up                                                 | (Ref: Very bad/somewhat bad)<br>Very good/somewhat good                                                                  | 1.24                         | 1.00                         |
| Parents married to each other when you were around 12 years old                          | (Ref: Parents married)<br>One or both of them had died<br>Parents were divorced<br>Parents were never married<br>Unsure  | 1.39<br>1.25<br>1.12<br>1.13 | 1.00<br>1.00<br>1.00<br>1.00 |
| Feelings about familys household income when growing up                                  | (Ref: Got by)<br>Found it difficult<br>Found it very difficult<br>Lived comfortably                                      | 1.15<br>1.11<br>1.05         | 1.00<br>1.00<br>1.00         |
| Physically or sexually abused when growing up                                            | (Ref: No)                                                                                                                | 1.17                         | 1.00                         |
| Felt like an outsider in your family when growing up                                     | (Ref: No)<br>Yes                                                                                                         | 1.11                         | 1.00                         |
| Your health when growing up                                                              | (Ref: Good)<br>Excellent<br>Fair<br>Poor<br>Very good                                                                    | 1.22<br>1.22<br>1.07<br>1.31 | 1.00<br>1.00<br>1.00<br>1.05 |
| Born in This country                                                                     | (Ref: Born in this country)<br>Born in another country                                                                   | 1.46                         | 1.27                         |
| How Often You Attended Religious Services or Worshiped When You Were Around 12 Years Old | (Ref: Never)<br>At least once a week<br>Less than once a month<br>One to three times a month<br>(Ref: 1998-2005; current | 1.25<br>1.23<br>1.15         | 1.00<br>1.00<br>1.00         |
| Year of birth (age group)                                                                | age: 18-24)<br>1943 or earlier (current age: 80+ years)<br>1943-1953 (current age: 70-                                   | 1.10<br>1.33                 | 1.00<br>1.00                 |

| Variable                                                    | Category                                  | E-value for Estimate | E-value for 95% CI |
|-------------------------------------------------------------|-------------------------------------------|----------------------|--------------------|
|                                                             | 79 years)                                 |                      |                    |
|                                                             | 1953-1963 (current age: 60-69 years)      | 1.23                 | 1.00               |
|                                                             | 1963-1973 (current age: 50-59 years)      | 1.12                 | 1.00               |
|                                                             | 1973-1983 (current age: 40-49 years)      | 1.17                 | 1.00               |
|                                                             | 1983-1993 (current age: 30-39 years)      | 1.25                 | 1.00               |
|                                                             | 1993-1998 (current age: 25-29 years)      | 1.31                 | 1.00               |
| Religion when twelve years old                              | (Ref: No religion/Atheist/Agnostic)       |                      |                    |
|                                                             | Christianity                              | 1.05                 | 1.00               |
|                                                             | Collapsed affiliations with prevalence<3% | 1.57                 | 1.14               |
| Race plurality (prominent race/ethnic group [0] or not [1]) | (Ref: Plurality group)                    |                      |                    |
|                                                             | Non-plurality groups                      | 1.20                 | 1.00               |

**Table S2a. Australia: Demographic descriptive statistics**

| <b>Characteristic</b>                    | <b>N = 2,533<sup>1</sup></b> |
|------------------------------------------|------------------------------|
| <b>Age group</b>                         |                              |
| 1943 or earlier (current age: 80+ years) | 112 (4.4%)                   |
| 1943-1953 (current age: 70-79 years)     | 311 (12%)                    |
| 1953-1963 (current age: 60-69 years)     | 380 (15%)                    |
| 1963-1973 (current age: 50-59 years)     | 456 (18%)                    |
| 1973-1983 (current age: 40-49 years)     | 389 (15%)                    |
| 1983-1993 (current age: 30-39 years)     | 454 (18%)                    |
| 1993-1998 (current age: 25-29 years)     | 206 (8.1%)                   |
| 1998-2005 (current age: 18-24 years)     | 226 (8.9%)                   |
| (Missing)                                | 0 (<0.1%)                    |
| <b>Gender</b>                            |                              |
| 1. Male                                  | 1,241 (49%)                  |
| 2. Female                                | 1,264 (50%)                  |
| 3. Other                                 | 24 (0.9%)                    |
| (Missing)                                | 4 (0.2%)                     |
| <b>Marital status</b>                    |                              |
| 1. Single/Never been married             | 599 (24%)                    |
| 2. Married                               | 1,152 (45%)                  |
| 3. Separated                             | 108 (4.3%)                   |
| 4. Divorced                              | 215 (8.5%)                   |
| 5. Widowed                               | 146 (5.8%)                   |
| 6. Domestic partner                      | 301 (12%)                    |
| (Missing)                                | 12 (0.5%)                    |
| <b>Employment</b>                        |                              |
| 1. Employed for an employer              | 1,271 (50%)                  |
| 2. Self-employed                         | 249 (9.8%)                   |
| 3. Retired                               | 588 (23%)                    |
| 4. Student                               | 111 (4.4%)                   |
| 5. Homemaker                             | 85 (3.4%)                    |
| 6. Unemployed and looking for a job      | 84 (3.3%)                    |
| 7. None of these/Other                   | 140 (5.5%)                   |
| (Missing)                                | 4 (0.1%)                     |
| <b>Religious service attendance</b>      |                              |
| 1. More than once a week                 | 113 (4.5%)                   |
| 2. Once a week                           | 215 (8.5%)                   |
| 3. One to three times a month            | 75 (3.0%)                    |
| 4. A few times a year                    | 397 (16%)                    |
| 5. Never                                 | 1,727 (68%)                  |
| (Missing)                                | 5 (0.2%)                     |
| <b>Education</b>                         |                              |
| 1. Up to 8                               | 55 (2.2%)                    |
| 2. 9-15                                  | 1,632 (64%)                  |
| 3. 16+                                   | 838 (33%)                    |
| (Missing)                                | 8 (0.3%)                     |
| <b>Immigration</b>                       |                              |
| 1. Born in this country                  | 1,999 (79%)                  |

| <b>Characteristic</b>                                       | <b>N = 2,533<sup>1</sup></b> |
|-------------------------------------------------------------|------------------------------|
| 2. Born in another country                                  | 527 (21%)                    |
| (Missing)                                                   | 8 (0.3%)                     |
| <b>Religious affiliation</b>                                |                              |
| 1. Christianity                                             | 1,026 (40%)                  |
| 10. Taoism                                                  | 5 (0.2%)                     |
| 11. Confucianism                                            | 0 (0%)                       |
| 12. Primal, Animist, or Folk religion                       | 10 (0.4%)                    |
| 13. Spiritism                                               | 0 (0%)                       |
| 14. Umbanda, Candomblé, and other African-derived religions | 0 (0%)                       |
| 15. Chinese folk/traditional religion                       | 0 (0%)                       |
| 2. Islam                                                    | 31 (1.2%)                    |
| 3. Hinduism                                                 | 8 (0.3%)                     |
| 4. Buddhism                                                 | 18 (0.7%)                    |
| 5. Judaism                                                  | 13 (0.5%)                    |
| 6. Sikhism                                                  | 5 (0.2%)                     |
| 7. Baha'i                                                   | 4 (0.2%)                     |
| 8. Jainism                                                  | 0 (0%)                       |
| 9. Shinto                                                   | 0 (0%)                       |
| 96. Some other religion                                     | 37 (1.5%)                    |
| 97. No religion/Atheist/Agnostic                            | 1,366 (54%)                  |
| (Missing)                                                   | 10 (0.4%)                    |
| <b>RACE ETHNICITY</b>                                       |                              |
| (Missing)                                                   | 9 (0.3%)                     |
| 201. Australia: Aboriginal                                  | 31 (1.2%)                    |
| 202. Australia: Australian                                  | 1,283 (51%)                  |
| 203. Australia: Australian British/European                 | 721 (28%)                    |
| 204. Australia: Chinese                                     | 48 (1.9%)                    |
| 205. Australia: Indian                                      | 21 (0.8%)                    |
| 206. Australia: Japanese                                    | 0 (<0.1%)                    |
| 207. Australia: Malay                                       | 10 (0.4%)                    |
| 208. Australia: Sinhalese                                   | 0 (<0.1%)                    |
| 209. Australia: Spanish                                     | 0 (<0.1%)                    |
| 210. Australia: Sri Lankan Moor                             | 0 (<0.1%)                    |
| 211. Australia: Sri Lankan Tamil                            | 5 (0.2%)                     |
| 212. Australia: Vietnamese                                  | 6 (0.2%)                     |
| 214. Australia: Russian                                     | 7 (0.3%)                     |
| 216. Australia: New Zealander                               | 63 (2.5%)                    |
| 217. Australia: Other European                              | 233 (9.2%)                   |
| 9996. Other                                                 | 94 (3.7%)                    |

<sup>1</sup>n (%)

**Table S2b. Australia: Childhood descriptive statistics**

| <b>Characteristic</b>                      | <b>N = 2,533<sup>1</sup></b> |
|--------------------------------------------|------------------------------|
| <b>Age</b>                                 | 49 (18)                      |
| <b>Year of birth</b>                       |                              |
| 1943 or earlier (current age: 80+ years)   | 112 (4.4%)                   |
| 1943-1953 (current age: 70-79 years)       | 311 (12%)                    |
| 1953-1963 (current age: 60-69 years)       | 380 (15%)                    |
| 1963-1973 (current age: 50-59 years)       | 456 (18%)                    |
| 1973-1983 (current age: 40-49 years)       | 389 (15%)                    |
| 1983-1993 (current age: 30-39 years)       | 454 (18%)                    |
| 1993-1998 (current age: 25-29 years)       | 206 (8.1%)                   |
| 1998-2005 (current age: 18-24 years)       | 226 (8.9%)                   |
| (Missing)                                  | 0 (<0.1%)                    |
| <b>Gender</b>                              |                              |
| 1. Male                                    | 1,241 (49%)                  |
| 2. Female                                  | 1,264 (50%)                  |
| 3. Other                                   | 24 (0.9%)                    |
| (Missing)                                  | 4 (0.2%)                     |
| <b>Parent marital status</b>               |                              |
| 1. Parents were married                    | 2,031 (80%)                  |
| 2. Parents were divorced                   | 318 (13%)                    |
| 3. Parents were never married              | 106 (4.2%)                   |
| 4. One or both of them had died            | 62 (2.5%)                    |
| 5. Unsure                                  | 7 (0.3%)                     |
| (Missing)                                  | 9 (0.4%)                     |
| <b>Age 12 religious service attendance</b> |                              |
| 1. At least once a week                    | 919 (36%)                    |
| 2. One to three times a month              | 291 (11%)                    |
| 3. Less than once a month                  | 406 (16%)                    |
| 4. Never                                   | 871 (34%)                    |
| (Missing)                                  | 46 (1.8%)                    |
| <b>Relationship with mother</b>            |                              |
| 1. Very good                               | 1,658 (65%)                  |
| 2. Somewhat good                           | 644 (25%)                    |
| 3. Somewhat bad                            | 142 (5.6%)                   |
| 4. Very bad                                | 67 (2.6%)                    |
| 97. (Does not apply)                       | 23 (0.9%)                    |
| (Missing)                                  | 0 (<0.1%)                    |
| <b>Relationship with father</b>            |                              |
| 1. Very good                               | 1,338 (53%)                  |
| 2. Somewhat good                           | 737 (29%)                    |
| 3. Somewhat bad                            | 218 (8.6%)                   |
| 4. Very bad                                | 133 (5.3%)                   |
| 97. (Does not apply)                       | 102 (4.0%)                   |
| (Missing)                                  | 5 (0.2%)                     |
| <b>Outsider growing up</b>                 |                              |
| 1. Yes                                     | 505 (20%)                    |
| 2. No                                      | 2,009 (79%)                  |
| (Missing)                                  | 19 (0.7%)                    |

| Characteristic                                              | N = 2,533 <sup>1</sup> |
|-------------------------------------------------------------|------------------------|
| <b>Abuse</b>                                                |                        |
| 1. Yes                                                      | 659 (26%)              |
| 2. No                                                       | 1,852 (73%)            |
| (Missing)                                                   | 22 (0.9%)              |
| <b>Self-rated health growing up</b>                         |                        |
| 1. Excellent                                                | 1,111 (44%)            |
| 2. Very good                                                | 728 (29%)              |
| 3. Good                                                     | 411 (16%)              |
| 4. Fair                                                     | 226 (8.9%)             |
| 5. Poor                                                     | 56 (2.2%)              |
| (Missing)                                                   | 1 (<0.1%)              |
| <b>Immigration status</b>                                   |                        |
| 1. Born in this country                                     | 1,999 (79%)            |
| 2. Born in another country                                  | 527 (21%)              |
| (Missing)                                                   | 8 (0.3%)               |
| <b>Subjective financial status of family growing up</b>     |                        |
| 1. Lived comfortably                                        | 1,107 (44%)            |
| 2. Got by                                                   | 1,028 (41%)            |
| 3. Found it difficult                                       | 292 (12%)              |
| 4. Found it very difficult                                  | 98 (3.9%)              |
| (Missing)                                                   | 8 (0.3%)               |
| <b>Religious affiliation</b>                                |                        |
| 1. Christianity                                             | 1,747 (69%)            |
| 10. Taoism                                                  | 1 (<0.1%)              |
| 11. Confucianism                                            | 0 (0%)                 |
| 12. Primal, Animist, or Folk religion                       | 1 (<0.1%)              |
| 13. Spiritism                                               | 0 (0%)                 |
| 14. Umbanda, Candomblé, and other African-derived religions | 0 (0%)                 |
| 15. Chinese folk/traditional religion                       | 0 (0%)                 |
| 2. Islam                                                    | 31 (1.2%)              |
| 3. Hinduism                                                 | 12 (0.5%)              |
| 4. Buddhism                                                 | 1 (<0.1%)              |
| 5. Judaism                                                  | 13 (0.5%)              |
| 6. Sikhism                                                  | 4 (0.1%)               |
| 7. Baha'i                                                   | 2 (<0.1%)              |
| 8. Jainism                                                  | 0 (0%)                 |
| 9. Shinto                                                   | 0 (0%)                 |
| 96. Some other religion                                     | 7 (0.3%)               |
| 97. No religion/Atheist/Agnostic                            | 702 (28%)              |
| (Missing)                                                   | 13 (0.5%)              |
| <b>Race/Ethnicity</b>                                       |                        |
| (Missing)                                                   | 9 (0.3%)               |
| 201. Australia: Aboriginal                                  | 31 (1.2%)              |
| 202. Australia: Australian                                  | 1,283 (51%)            |
| 203. Australia: Australian British/European                 | 721 (28%)              |
| 204. Australia: Chinese                                     | 48 (1.9%)              |
| 205. Australia: Indian                                      | 21 (0.8%)              |

| <b>Characteristic</b>            | <b>N = 2,533<sup>1</sup></b> |
|----------------------------------|------------------------------|
| 206. Australia: Japanese         | 0 (<0.1%)                    |
| 207. Australia: Malay            | 10 (0.4%)                    |
| 208. Australia: Sinhalese        | 0 (<0.1%)                    |
| 209. Australia: Spanish          | 0 (<0.1%)                    |
| 210. Australia: Sri Lankan Moor  | 0 (<0.1%)                    |
| 211. Australia: Sri Lankan Tamil | 5 (0.2%)                     |
| 212. Australia: Vietnamese       | 6 (0.2%)                     |
| 214. Australia: Russian          | 7 (0.3%)                     |
| 216. Australia: New Zealander    | 63 (2.5%)                    |
| 217. Australia: Other European   | 233 (9.2%)                   |
| 9996. Other                      | 94 (3.7%)                    |

<sup>1</sup>Mean (SD); n (%)

**Table S2c. Australia: Proportions by demographic category**

| Variable                         | Category                                 | Proportion               | 95% CI         | SE             | p-value  |
|----------------------------------|------------------------------------------|--------------------------|----------------|----------------|----------|
| Age group                        | 1998-2005 (current age: 18-24 years)     | 0.933                    | (0.875, 0.991) | 0.029          | 3.29e-01 |
|                                  | 1943 or earlier (current age: 80+ years) | 0.873                    | (0.796, 0.950) | 0.039          |          |
|                                  | 1943-1953 (current age: 70-79 years)     | 0.865                    | (0.816, 0.914) | 0.025          |          |
|                                  | 1953-1963 (current age: 60-69 years)     | 0.873                    | (0.833, 0.912) | 0.020          |          |
|                                  | 1963-1973 (current age: 50-59 years)     | 0.856                    | (0.815, 0.898) | 0.021          |          |
|                                  | 1973-1983 (current age: 40-49 years)     | 0.864                    | (0.816, 0.912) | 0.025          |          |
|                                  | 1983-1993 (current age: 30-39 years)     | 0.863                    | (0.810, 0.916) | 0.027          |          |
|                                  | 1993-1998 (current age: 25-29 years)     | 0.925                    | (0.866, 0.984) | 0.030          |          |
|                                  | Male                                     | 0.859                    | (0.831, 0.887) | 0.014          |          |
|                                  | Female                                   | 0.889                    | (0.864, 0.914) | 0.013          |          |
| Gender                           | Other                                    | 1.000                    | *              | *              | < 1e-16  |
| Marital status                   | Single/Never been married                | 0.875                    | (0.832, 0.918) | 0.022          | 9.80e-01 |
|                                  | Divorced                                 | 0.866                    | (0.809, 0.923) | 0.029          |          |
|                                  | Domestic partner                         | 0.881                    | (0.821, 0.941) | 0.031          |          |
|                                  | Married                                  | 0.879                    | (0.855, 0.903) | 0.012          |          |
|                                  | Separated                                | 0.841                    | (0.736, 0.946) | 0.053          |          |
|                                  | Widowed                                  | 0.873                    | (0.800, 0.946) | 0.037          |          |
|                                  | Employment                               | Employed for an employer | 0.866          | (0.839, 0.894) |          |
| Homemaker                        | 0.911                                    | (0.830, 0.991)           | 0.040          |                |          |
| None of these/Other              | 0.861                                    | (0.777, 0.945)           | 0.043          |                |          |
| Retired                          | 0.865                                    | (0.830, 0.899)           | 0.018          |                |          |
| Self-employed                    | 0.889                                    | (0.834, 0.945)           | 0.028          |                |          |
| Student                          | 0.930                                    | (0.841, 1.000)           | 0.045          |                |          |
| Unemployed and looking for a job | 0.958                                    | (0.915, 1.000)           | 0.022          |                |          |
| Religious service attendance     | Never                                    | 0.868                    | (0.844, 0.891) | 0.012          | 6.34e-01 |
|                                  | A few times a year                       | 0.891                    | (0.850, 0.932) | 0.021          |          |
|                                  | More than once a week                    | 0.914                    | (0.837, 0.990) | 0.038          |          |
|                                  | Once a week                              | 0.876                    | (0.814, 0.938) | 0.031          |          |
|                                  | One to three times a month               | 0.910                    | (0.820, 1.000) | 0.045          |          |

| Variable              | Category                                                | Proportion | 95% CI         | SE    | p-value  |
|-----------------------|---------------------------------------------------------|------------|----------------|-------|----------|
| Education             | 9-15                                                    | 0.862      | (0.837, 0.887) | 0.013 | 3.35e-02 |
|                       | 16+                                                     | 0.905      | (0.882, 0.928) | 0.012 |          |
|                       | Up to 8                                                 | 0.809      | (0.631, 0.986) | 0.088 |          |
| Immigration status    | Born in this country                                    | 0.879      | (0.858, 0.899) | 0.010 | 4.70e-01 |
|                       | Born in another country                                 | 0.862      | (0.821, 0.903) | 0.021 |          |
|                       | No                                                      |            |                |       |          |
| Religious affiliation | religion/Atheist/Agnostic                               | 0.884      | (0.860, 0.909) | 0.013 | 5.85e-01 |
|                       | Christianity                                            | 0.865      | (0.836, 0.893) | 0.015 |          |
|                       | Combined                                                | 0.867      | (0.771, 0.963) | 0.049 |          |
|                       | Spiritism                                               | *          | *              | *     |          |
|                       | Umbanda, Candomblé, and other African-derived religions | *          | *              | *     |          |
|                       | Buddhism                                                | *          | *              | *     |          |
|                       | Islam                                                   | *          | *              | *     |          |
|                       | Chinese folk/traditional religion                       | *          | *              | *     |          |
|                       | Hinduism                                                | *          | *              | *     |          |
|                       | Judaism                                                 | *          | *              | *     |          |
|                       | Primal, Animist, or Folk religion                       | *          | *              | *     |          |
|                       |                                                         |            |                |       |          |
|                       |                                                         |            |                |       |          |
|                       |                                                         |            |                |       |          |

**Table S2d. Australia: Childhood predictors regression analysis**

| Variable                                                        | Category                                                                                                                | Risk-Ratio                       | logRR SE                         | RR 95% CI                                                | Global p-value |
|-----------------------------------------------------------------|-------------------------------------------------------------------------------------------------------------------------|----------------------------------|----------------------------------|----------------------------------------------------------|----------------|
| Relationship with your mother growing up                        | (Ref: Very bad/somewhat bad)<br>Very good/somewhat good                                                                 | 1.041                            | 0.041                            | (0.96,1.13)                                              | 0.369          |
| Relationship with your father growing up                        | (Ref: Very bad/somewhat bad)<br>Very good/somewhat good                                                                 | 1.030                            | 0.032                            | (0.97,1.10)                                              | 0.382          |
| Parents married to each other when you were around 12 years old | (Ref: Parents married)<br>One or both of them had died<br>Parents were divorced<br>Parents were never married<br>Unsure | 1.042<br>1.016<br>0.999<br>1.197 | 0.073<br>0.032<br>0.065<br>0.039 | (0.90,1.20)<br>(0.95,1.08)<br>(0.88,1.13)<br>(1.11,1.29) | 1.34e-05       |
| Feelings about familys household income when growing up         | (Ref: Got by)<br>Found it difficult<br>Found it very difficult<br>Lived comfortably                                     | 0.977<br>1.055<br>1.026          | 0.033<br>0.045<br>0.020          | (0.92,1.04)<br>(0.97,1.15)<br>(0.99,1.07)                | 0.404          |
| Physically or sexually abused when growing up                   | (Ref: No)                                                                                                               | 1.063                            | 0.021                            | (1.02,1.11)                                              | 0.004          |
| Felt like an outsider in your family when growing up            | (Ref: No)<br>Yes                                                                                                        | 0.967                            | 0.029                            | (0.91,1.02)                                              | 0.293          |
| Your health when growing up                                     | (Ref: Good)<br>Excellent<br>Fair<br>Poor<br>Very good                                                                   | 1.023<br>1.023<br>1.002<br>0.978 | 0.028<br>0.039<br>0.078<br>0.030 | (0.97,1.08)<br>(0.95,1.10)<br>(0.86,1.17)<br>(0.92,1.04) | 0.711          |
| Born in This                                                    | (Ref: Born in this                                                                                                      |                                  |                                  |                                                          | 0.415          |

| Variable                                                                                  | Category                                  | Risk-Ratio | logRR SE | RR 95% CI   | Global p-value |
|-------------------------------------------------------------------------------------------|-------------------------------------------|------------|----------|-------------|----------------|
| country                                                                                   | country)                                  |            |          |             |                |
|                                                                                           | Born in another country                   | 1.024      | 0.028    | (0.97,1.08) |                |
| How Often You Attended Religious Services or Worshipped When You Were Around 12 Years Old | (Ref: Never)                              |            |          |             | 0.461          |
|                                                                                           | At least once a week                      | 1.013      | 0.025    | (0.96,1.06) |                |
|                                                                                           | Less than once a month                    | 0.958      | 0.031    | (0.90,1.02) |                |
|                                                                                           | One to three times a month                | 0.975      | 0.036    | (0.91,1.05) |                |
| Year of birth (age group)                                                                 | (Ref: 1998-2005; current age: 18-24)      |            |          |             | 0.010          |
|                                                                                           | 1943 or earlier (current age: 80+ years)  | 0.913      | 0.048    | (0.83,1.00) |                |
|                                                                                           | 1943-1953 (current age: 70-79 years)      | 0.898      | 0.040    | (0.83,0.97) |                |
|                                                                                           | 1953-1963 (current age: 60-69 years)      | 0.912      | 0.035    | (0.85,0.98) |                |
|                                                                                           | 1963-1973 (current age: 50-59 years)      | 0.897      | 0.037    | (0.83,0.96) |                |
|                                                                                           | 1973-1983 (current age: 40-49 years)      | 0.907      | 0.038    | (0.84,0.98) |                |
|                                                                                           | 1983-1993 (current age: 30-39 years)      | 0.915      | 0.040    | (0.85,0.99) |                |
|                                                                                           | 1993-1998 (current age: 25-29 years)      | 0.966      | 0.044    | (0.89,1.05) |                |
| Religion when twelve years old                                                            | (Ref: No religion/Atheist/Agnostic)       |            |          |             | 0.383          |
|                                                                                           | Christianity                              | 0.984      | 0.026    | (0.94,1.04) |                |
|                                                                                           | Collapsed affiliations with prevalence<3% | 0.907      | 0.075    | (0.78,1.05) |                |
| Race plurality (prominent race/ethnic group [0] or not [1])                               | (Ref: Plurality group)                    |            |          |             | 0.057          |
|                                                                                           | Non-plurality groups                      | 0.942      | 0.030    | (0.89,1.00) |                |

**Table S2e. Australia: Sensitivity to unmeasured confounding of childhood predictors**

| Variable                                                                                 | Category                                 | E-value for Estimate | E-value for 95% CI |
|------------------------------------------------------------------------------------------|------------------------------------------|----------------------|--------------------|
| Relationship with your mother growing up                                                 | (Ref: Very bad/somewhat bad)             |                      |                    |
|                                                                                          | Very good/somewhat good                  | 1.25                 | 1.00               |
| Relationship with your father growing up                                                 | (Ref: Very bad/somewhat bad)             |                      |                    |
|                                                                                          | Very good/somewhat good                  | 1.21                 | 1.00               |
| Parents married to each other when you were around 12 years old                          | (Ref: Parents married)                   |                      |                    |
|                                                                                          | One or both of them had died             | 1.25                 | 1.00               |
|                                                                                          | Parents were divorced                    | 1.15                 | 1.00               |
|                                                                                          | Parents were never married               | 1.04                 | 1.00               |
|                                                                                          | Unsure                                   | 1.68                 | 1.46               |
| Feelings about family household income when growing up                                   | (Ref: Got by)                            |                      |                    |
|                                                                                          | Found it difficult                       | 1.18                 | 1.00               |
|                                                                                          | Found it very difficult                  | 1.30                 | 1.00               |
|                                                                                          | Lived comfortably                        | 1.19                 | 1.00               |
| Physically or sexually abused when growing up                                            | (Ref: No)                                |                      |                    |
|                                                                                          |                                          | 1.32                 | 1.16               |
| Felt like an outsider in your family when growing up                                     | (Ref: No)                                |                      |                    |
|                                                                                          | Yes                                      | 1.22                 | 1.00               |
| Your health when growing up                                                              | (Ref: Good)                              |                      |                    |
|                                                                                          | Excellent                                | 1.18                 | 1.00               |
|                                                                                          | Fair                                     | 1.17                 | 1.00               |
|                                                                                          | Poor                                     | 1.04                 | 1.00               |
|                                                                                          | Very good                                | 1.17                 | 1.00               |
| Born in This country                                                                     | (Ref: Born in this country)              |                      |                    |
|                                                                                          | Born in another country                  | 1.18                 | 1.00               |
| How Often You Attended Religious Services or Worshiped When You Were Around 12 Years Old | (Ref: Never)                             |                      |                    |
|                                                                                          | At least once a week                     | 1.13                 | 1.00               |
|                                                                                          | Less than once a month                   | 1.26                 | 1.00               |
|                                                                                          | One to three times a month               | 1.19                 | 1.00               |
| Year of birth (age group)                                                                | (Ref: 1998-2005; current age: 18-24)     |                      |                    |
|                                                                                          | 1943 or earlier (current age: 80+ years) | 1.42                 | 1.00               |
|                                                                                          | 1943-1953 (current age: 70-79 years)     | 1.47                 | 1.21               |

| Variable                                                    | Category                                  | E-value for Estimate | E-value for 95% CI |
|-------------------------------------------------------------|-------------------------------------------|----------------------|--------------------|
|                                                             | 1953-1963 (current age: 60-69 years)      | 1.42                 | 1.18               |
|                                                             | 1963-1973 (current age: 50-59 years)      | 1.47                 | 1.23               |
|                                                             | 1973-1983 (current age: 40-49 years)      | 1.44                 | 1.17               |
|                                                             | 1983-1993 (current age: 30-39 years)      | 1.41                 | 1.11               |
|                                                             | 1993-1998 (current age: 25-29 years)      | 1.22                 | 1.00               |
| Religion when twelve years old                              | (Ref: No religion/Atheist/Agnostic)       |                      |                    |
|                                                             | Christianity                              | 1.14                 | 1.00               |
|                                                             | Collapsed affiliations with prevalence<3% | 1.44                 | 1.00               |
| Race plurality (prominent race/ethnic group [0] or not [1]) | (Ref: Plurality group)                    |                      |                    |
|                                                             | Non-plurality groups                      | 1.32                 | 1.01               |

**Table S3a. Brazil: Demographic descriptive statistics**

| <b>Characteristic</b>                    | <b>N = 4,044<sup>1</sup></b> |
|------------------------------------------|------------------------------|
| <b>Age group</b>                         |                              |
| 1943 or earlier (current age: 80+ years) | 54 (1.3%)                    |
| 1943-1953 (current age: 70-79 years)     | 202 (5.0%)                   |
| 1953-1963 (current age: 60-69 years)     | 482 (12%)                    |
| 1963-1973 (current age: 50-59 years)     | 636 (16%)                    |
| 1973-1983 (current age: 40-49 years)     | 784 (19%)                    |
| 1983-1993 (current age: 30-39 years)     | 888 (22%)                    |
| 1993-1998 (current age: 25-29 years)     | 389 (9.6%)                   |
| 1998-2005 (current age: 18-24 years)     | 609 (15%)                    |
| (Missing)                                | 0 (0%)                       |
| <b>Gender</b>                            |                              |
| 1. Male                                  | 1,934 (48%)                  |
| 2. Female                                | 2,094 (52%)                  |
| 3. Other                                 | 12 (0.3%)                    |
| (Missing)                                | 3 (<0.1%)                    |
| <b>Marital status</b>                    |                              |
| 1. Single/Never been married             | 1,421 (35%)                  |
| 2. Married                               | 1,415 (35%)                  |
| 3. Separated                             | 175 (4.3%)                   |
| 4. Divorced                              | 224 (5.5%)                   |
| 5. Widowed                               | 179 (4.4%)                   |
| 6. Domestic partner                      | 581 (14%)                    |
| (Missing)                                | 48 (1.2%)                    |
| <b>Employment</b>                        |                              |
| 1. Employed for an employer              | 1,089 (27%)                  |
| 2. Self-employed                         | 877 (22%)                    |
| 3. Retired                               | 526 (13%)                    |
| 4. Student                               | 213 (5.3%)                   |
| 5. Homemaker                             | 423 (10%)                    |
| 6. Unemployed and looking for a job      | 754 (19%)                    |
| 7. None of these/Other                   | 136 (3.4%)                   |
| (Missing)                                | 26 (0.6%)                    |
| <b>Religious service attendance</b>      |                              |
| 1. More than once a week                 | 781 (19%)                    |
| 2. Once a week                           | 711 (18%)                    |
| 3. One to three times a month            | 407 (10%)                    |
| 4. A few times a year                    | 1,142 (28%)                  |
| 5. Never                                 | 983 (24%)                    |
| (Missing)                                | 19 (0.5%)                    |
| <b>Education</b>                         |                              |
| 1. Up to 8                               | 1,105 (27%)                  |
| 2. 9-15                                  | 2,265 (56%)                  |
| 3. 16+                                   | 671 (17%)                    |
| (Missing)                                | 3 (<0.1%)                    |
| <b>Immigration</b>                       |                              |
| 1. Born in this country                  | 3,944 (98%)                  |
| 2. Born in another country               | 40 (1.0%)                    |

| <b>Characteristic</b>                                       | <b>N = 4,044<sup>1</sup></b> |
|-------------------------------------------------------------|------------------------------|
| (Missing)                                                   | 60 (1.5%)                    |
| <b>Religious affiliation</b>                                |                              |
| 1. Christianity                                             | 3,048 (75%)                  |
| 10. Taoism                                                  | 0 (<0.1%)                    |
| 11. Confucianism                                            | 3 (<0.1%)                    |
| 12. Primal, Animist, or Folk religion                       | 2 (<0.1%)                    |
| 13. Spiritism                                               | 210 (5.2%)                   |
| 14. Umbanda, Candomblé, and other African-derived religions | 144 (3.6%)                   |
| 15. Chinese folk/traditional religion                       | 0 (0%)                       |
| 2. Islam                                                    | 2 (<0.1%)                    |
| 3. Hinduism                                                 | 0 (0%)                       |
| 4. Buddhism                                                 | 8 (0.2%)                     |
| 5. Judaism                                                  | 7 (0.2%)                     |
| 6. Sikhism                                                  | 0 (0%)                       |
| 7. Baha'i                                                   | 0 (0%)                       |
| 8. Jainism                                                  | 0 (0%)                       |
| 9. Shinto                                                   | 0 (0%)                       |
| 96. Some other religion                                     | 49 (1.2%)                    |
| 97. No religion/Atheist/Agnostic                            | 547 (14%)                    |
| (Missing)                                                   | 25 (0.6%)                    |
| <b>RACE ETHNICITY</b>                                       |                              |
| (Missing)                                                   | 95 (2.4%)                    |
| 301. Brazil: Branca                                         | 1,671 (41%)                  |
| 302. Brazil: Preta                                          | 482 (12%)                    |
| 303. Brazil: Parda                                          | 1,599 (40%)                  |
| 304. Brazil: Amarela                                        | 75 (1.8%)                    |
| 305. Brazil: Indígena                                       | 40 (1.0%)                    |
| 9995. Prefer not to answer                                  | 64 (1.6%)                    |
| 9996. Other                                                 | 18 (0.4%)                    |

<sup>1</sup>n (%)

**Table S3a. Brazil: Childhood descriptive statistics**

| <b>Characteristic</b>                      | <b>N = 4,044<sup>1</sup></b> |
|--------------------------------------------|------------------------------|
| <b>Age</b>                                 | 43 (16)                      |
| <b>Year of birth</b>                       |                              |
| 1943 or earlier (current age: 80+ years)   | 54 (1.3%)                    |
| 1943-1953 (current age: 70-79 years)       | 202 (5.0%)                   |
| 1953-1963 (current age: 60-69 years)       | 482 (12%)                    |
| 1963-1973 (current age: 50-59 years)       | 636 (16%)                    |
| 1973-1983 (current age: 40-49 years)       | 784 (19%)                    |
| 1983-1993 (current age: 30-39 years)       | 888 (22%)                    |
| 1993-1998 (current age: 25-29 years)       | 389 (9.6%)                   |
| 1998-2005 (current age: 18-24 years)       | 609 (15%)                    |
| (Missing)                                  | 0 (0%)                       |
| <b>Gender</b>                              |                              |
| 1. Male                                    | 1,934 (48%)                  |
| 2. Female                                  | 2,094 (52%)                  |
| 3. Other                                   | 12 (0.3%)                    |
| (Missing)                                  | 3 (<0.1%)                    |
| <b>Parent marital status</b>               |                              |
| 1. Parents were married                    | 2,741 (68%)                  |
| 2. Parents were divorced                   | 352 (8.7%)                   |
| 3. Parents were never married              | 650 (16%)                    |
| 4. One or both of them had died            | 161 (4.0%)                   |
| 5. Unsure                                  | 82 (2.0%)                    |
| (Missing)                                  | 57 (1.4%)                    |
| <b>Age 12 religious service attendance</b> |                              |
| 1. At least once a week                    | 2,045 (51%)                  |
| 2. One to three times a month              | 680 (17%)                    |
| 3. Less than once a month                  | 760 (19%)                    |
| 4. Never                                   | 543 (13%)                    |
| (Missing)                                  | 16 (0.4%)                    |
| <b>Relationship with mother</b>            |                              |
| 1. Very good                               | 2,607 (64%)                  |
| 2. Somewhat good                           | 1,060 (26%)                  |
| 3. Somewhat bad                            | 129 (3.2%)                   |
| 4. Very bad                                | 61 (1.5%)                    |
| 97. (Does not apply)                       | 174 (4.3%)                   |
| (Missing)                                  | 13 (0.3%)                    |
| <b>Relationship with father</b>            |                              |
| 1. Very good                               | 1,902 (47%)                  |
| 2. Somewhat good                           | 1,165 (29%)                  |
| 3. Somewhat bad                            | 316 (7.8%)                   |
| 4. Very bad                                | 236 (5.8%)                   |
| 97. (Does not apply)                       | 389 (9.6%)                   |
| (Missing)                                  | 36 (0.9%)                    |
| <b>Outsider growing up</b>                 |                              |
| 1. Yes                                     | 559 (14%)                    |
| 2. No                                      | 3,416 (84%)                  |
| (Missing)                                  | 69 (1.7%)                    |

| Characteristic                                              | N = 4,044 <sup>1</sup> |
|-------------------------------------------------------------|------------------------|
| <b>Abuse</b>                                                |                        |
| 1. Yes                                                      | 884 (22%)              |
| 2. No                                                       | 3,104 (77%)            |
| (Missing)                                                   | 57 (1.4%)              |
| <b>Self-rated health growing up</b>                         |                        |
| 1. Excellent                                                | 1,512 (37%)            |
| 2. Very good                                                | 1,006 (25%)            |
| 3. Good                                                     | 962 (24%)              |
| 4. Fair                                                     | 481 (12%)              |
| 5. Poor                                                     | 79 (2.0%)              |
| (Missing)                                                   | 4 (0.1%)               |
| <b>Immigration status</b>                                   |                        |
| 1. Born in this country                                     | 3,944 (98%)            |
| 2. Born in another country                                  | 40 (1.0%)              |
| (Missing)                                                   | 60 (1.5%)              |
| <b>Subjective financial status of family growing up</b>     |                        |
| 1. Lived comfortably                                        | 1,519 (38%)            |
| 2. Got by                                                   | 1,338 (33%)            |
| 3. Found it difficult                                       | 813 (20%)              |
| 4. Found it very difficult                                  | 352 (8.7%)             |
| (Missing)                                                   | 22 (0.6%)              |
| <b>Religious affiliation</b>                                |                        |
| 1. Christianity                                             | 3,552 (88%)            |
| 10. Taoism                                                  | 1 (<0.1%)              |
| 11. Confucianism                                            | 4 (<0.1%)              |
| 12. Primal, Animist, or Folk religion                       | 4 (0.1%)               |
| 13. Spiritism                                               | 79 (2.0%)              |
| 14. Umbanda, Candomblé, and other African-derived religions | 71 (1.8%)              |
| 15. Chinese folk/traditional religion                       | 0 (0%)                 |
| 2. Islam                                                    | 5 (0.1%)               |
| 3. Hinduism                                                 | 0 (<0.1%)              |
| 4. Buddhism                                                 | 6 (0.2%)               |
| 5. Judaism                                                  | 8 (0.2%)               |
| 6. Sikhism                                                  | 0 (0%)                 |
| 7. Baha'i                                                   | 0 (0%)                 |
| 8. Jainism                                                  | 1 (<0.1%)              |
| 9. Shinto                                                   | 1 (<0.1%)              |
| 96. Some other religion                                     | 19 (0.5%)              |
| 97. No religion/Atheist/Agnostic                            | 266 (6.6%)             |
| (Missing)                                                   | 27 (0.7%)              |
| <b>Race/Ethnicity</b>                                       |                        |
| (Missing)                                                   | 95 (2.4%)              |
| 301. Brazil: Branca                                         | 1,671 (41%)            |
| 302. Brazil: Preta                                          | 482 (12%)              |
| 303. Brazil: Parda                                          | 1,599 (40%)            |
| 304. Brazil: Amarela                                        | 75 (1.8%)              |
| 305. Brazil: Indígena                                       | 40 (1.0%)              |

| Characteristic             | N = 4,044 <sup>1</sup> |
|----------------------------|------------------------|
| 9995. Prefer not to answer | 64 (1.6%)              |
| 9996. Other                | 18 (0.4%)              |

<sup>1</sup>Mean (SD); n (%)

**Table S3c. Brazil: Proportions by demographic category**

| Variable                     | Category                                 | Proportion | 95% CI         | SE    | p-value  |
|------------------------------|------------------------------------------|------------|----------------|-------|----------|
| Age group                    | 1998-2005 (current age: 18-24 years)     | 0.777      | (0.728, 0.827) | 0.025 | 3.53e-01 |
|                              | 1943 or earlier (current age: 80+ years) | 0.769      | (0.606, 0.932) | 0.081 |          |
|                              | 1943-1953 (current age: 70-79 years)     | 0.757      | (0.655, 0.858) | 0.052 |          |
|                              | 1953-1963 (current age: 60-69 years)     | 0.749      | (0.688, 0.810) | 0.031 |          |
|                              | 1963-1973 (current age: 50-59 years)     | 0.744      | (0.700, 0.788) | 0.022 |          |
|                              | 1973-1983 (current age: 40-49 years)     | 0.723      | (0.683, 0.762) | 0.020 |          |
|                              | 1983-1993 (current age: 30-39 years)     | 0.704      | (0.664, 0.745) | 0.021 |          |
|                              | 1993-1998 (current age: 25-29 years)     | 0.696      | (0.633, 0.760) | 0.032 |          |
|                              | Male                                     | 0.734      | (0.706, 0.761) | 0.014 |          |
|                              | Female                                   | 0.733      | (0.708, 0.759) | 0.013 |          |
| Gender                       | Other                                    | 0.672      | (0.204, 1.000) | 0.196 | 9.49e-01 |
| Marital status               | Single/Never been married                | 0.709      | (0.675, 0.744) | 0.018 | 1.01e-01 |
|                              | Divorced                                 | 0.804      | (0.742, 0.865) | 0.031 |          |
|                              | Domestic partner                         | 0.753      | (0.709, 0.798) | 0.023 |          |
|                              | Married                                  | 0.746      | (0.716, 0.776) | 0.015 |          |
|                              | Separated                                | 0.695      | (0.591, 0.800) | 0.053 |          |
|                              | Widowed                                  | 0.706      | (0.594, 0.817) | 0.056 |          |
|                              | Employed for an employer                 | 0.758      | (0.728, 0.787) | 0.015 | 1.79e-03 |
| Employment                   | Homemaker                                | 0.679      | (0.613, 0.744) | 0.033 |          |
|                              | None of these/Other                      | 0.789      | (0.682, 0.896) | 0.054 |          |
|                              | Retired                                  | 0.783      | (0.727, 0.839) | 0.028 |          |
|                              | Self-employed                            | 0.731      | (0.692, 0.769) | 0.020 |          |
|                              | Student                                  | 0.821      | (0.741, 0.902) | 0.041 |          |
|                              | Unemployed and looking for a job         | 0.662      | (0.610, 0.714) | 0.026 |          |
| Religious service attendance | Never                                    | 0.681      | (0.639, 0.723) | 0.021 | 1.50e-02 |
|                              | A few times a year                       | 0.744      | (0.710, 0.778) | 0.017 |          |
|                              | More than once a week                    | 0.781      | (0.737, 0.824) | 0.022 |          |
|                              | Once a week                              | 0.720      | (0.675, 0.766) | 0.023 |          |
|                              | One to three times                       | 0.760      | (0.706, 0.813) | 0.027 |          |

| Variable              | Category                                                | Proportion | 95% CI         | SE    | p-value  |
|-----------------------|---------------------------------------------------------|------------|----------------|-------|----------|
| Education             | a month                                                 |            |                |       |          |
|                       | 9-15                                                    | 0.747      | (0.723, 0.771) | 0.012 | 9.01e-04 |
|                       | 16+                                                     | 0.780      | (0.749, 0.811) | 0.016 |          |
| Immigration status    | Up to 8                                                 | 0.676      | (0.632, 0.721) | 0.023 |          |
|                       | Born in this country                                    | 0.736      | (0.717, 0.755) | 0.010 | 8.63e-03 |
|                       | Born in another country                                 | 0.456      | (0.240, 0.672) | 0.107 |          |
| Religious affiliation | No religion/Atheist/Agnostic                            | 0.743      | (0.694, 0.793) | 0.025 | 3.17e-01 |
|                       | Christianity                                            | 0.726      | (0.703, 0.748) | 0.011 |          |
|                       | Combined                                                | 0.744      | (0.605, 0.884) | 0.070 |          |
|                       | Spiritism                                               | 0.769      | (0.700, 0.839) | 0.035 |          |
|                       | Umbanda, Candomblé, and other African-derived religions | 0.799      | (0.724, 0.874) | 0.038 |          |
|                       | Buddhism                                                | *          | *              | *     |          |
|                       | Islam                                                   | *          | *              | *     |          |
|                       | Chinese                                                 |            |                |       |          |
|                       | folk/traditional religion                               | *          | *              | *     |          |
|                       | Hinduism                                                | *          | *              | *     |          |
|                       | Judaism                                                 | *          | *              | *     |          |
|                       | Primal, Animist, or Folk religion                       | *          | *              | *     |          |



**Table S3d. Brazil: Childhood predictors regression analysis**

| Variable                                                        | Category                                                                                                                | Risk-Ratio                       | logRR SE                         | RR 95% CI                                                | Global p-value |
|-----------------------------------------------------------------|-------------------------------------------------------------------------------------------------------------------------|----------------------------------|----------------------------------|----------------------------------------------------------|----------------|
| Relationship with your mother growing up                        | (Ref: Very bad/somewhat bad)<br>Very good/somewhat good                                                                 | 0.995                            | 0.038                            | (0.92,1.07)                                              | 0.596          |
| Relationship with your father growing up                        | (Ref: Very bad/somewhat bad)<br>Very good/somewhat good                                                                 | 1.009                            | 0.028                            | (0.95,1.07)                                              | 0.561          |
| Parents married to each other when you were around 12 years old | (Ref: Parents married)<br>One or both of them had died<br>Parents were divorced<br>Parents were never married<br>Unsure | 1.034<br>0.973<br>1.012<br>0.875 | 0.057<br>0.036<br>0.031<br>0.072 | (0.92,1.16)<br>(0.91,1.04)<br>(0.95,1.07)<br>(0.76,1.01) | 0.295          |
| Feelings about familys household income when growing up         | (Ref: Got by)<br>Found it difficult<br>Found it very difficult<br>Lived comfortably                                     | 1.017<br>1.041<br>1.069          | 0.028<br>0.038<br>0.023          | (0.96,1.07)<br>(0.97,1.12)<br>(1.02,1.12)                | 0.013          |
| Physically or sexually abused when growing up                   | (Ref: No)                                                                                                               | 1.017                            | 0.025                            | (0.97,1.07)                                              | 0.470          |
| Felt like an outsider in your family when growing up            | (Ref: No)<br>Yes                                                                                                        | 1.010                            | 0.029                            | (0.95,1.07)                                              | 0.554          |
| Your health when growing up                                     | (Ref: Good)<br>Excellent<br>Fair<br>Poor<br>Very good                                                                   | 1.012<br>0.989<br>0.961<br>0.992 | 0.025<br>0.035<br>0.084<br>0.028 | (0.96,1.06)<br>(0.92,1.06)<br>(0.82,1.13)<br>(0.94,1.05) | 0.778          |
| Born in This                                                    | (Ref: Born in this                                                                                                      |                                  |                                  |                                                          | 0.005          |

| Variable                                                                                  | Category                                  | Risk-Ratio | logRR SE | RR 95% CI   | Global p-value |
|-------------------------------------------------------------------------------------------|-------------------------------------------|------------|----------|-------------|----------------|
| country                                                                                   | country)                                  |            |          |             |                |
|                                                                                           | Born in another country                   | 0.741      | 0.106    | (0.60,0.91) |                |
| How Often You Attended Religious Services or Worshipped When You Were Around 12 Years Old | (Ref: Never)                              |            |          |             | 0.108          |
|                                                                                           | At least once a week                      | 1.068      | 0.033    | (1.00,1.14) |                |
|                                                                                           | Less than once a month                    | 1.034      | 0.038    | (0.96,1.11) |                |
|                                                                                           | One to three times a month                | 1.072      | 0.039    | (0.99,1.16) |                |
| Year of birth (age group)                                                                 | (Ref: 1998-2005; current age: 18-24)      |            |          |             | 0.254          |
|                                                                                           | 1943 or earlier (current age: 80+ years)  | 1.023      | 0.079    | (0.88,1.19) |                |
|                                                                                           | 1943-1953 (current age: 70-79 years)      | 0.972      | 0.060    | (0.86,1.09) |                |
|                                                                                           | 1953-1963 (current age: 60-69 years)      | 0.981      | 0.042    | (0.90,1.07) |                |
|                                                                                           | 1963-1973 (current age: 50-59 years)      | 0.978      | 0.036    | (0.91,1.05) |                |
|                                                                                           | 1973-1983 (current age: 40-49 years)      | 0.953      | 0.034    | (0.89,1.02) |                |
|                                                                                           | 1983-1993 (current age: 30-39 years)      | 0.939      | 0.033    | (0.88,1.00) |                |
|                                                                                           | 1993-1998 (current age: 25-29 years)      | 0.926      | 0.040    | (0.86,1.00) |                |
| Religion when twelve years old                                                            | (Ref: No religion/Atheist/Agnostic)       |            |          |             | 0.166          |
|                                                                                           | Christianity                              | 0.940      | 0.040    | (0.87,1.02) |                |
|                                                                                           | Collapsed affiliations with prevalence<3% | 0.917      | 0.057    | (0.82,1.02) |                |
| Race plurality (prominent race/ethnic group [0] or not [1])                               | (Ref: Plurality group)                    |            |          |             | 0.418          |
|                                                                                           | Non-plurality groups                      | 0.983      | 0.020    | (0.95,1.02) |                |

**Table S3e. Brazil: Sensitivity to unmeasured confounding of childhood predictors**

| Variable                                                                                 | Category                                                                                                                 | E-value for Estimate         | E-value for 95% CI           |
|------------------------------------------------------------------------------------------|--------------------------------------------------------------------------------------------------------------------------|------------------------------|------------------------------|
| Relationship with your mother growing up                                                 | (Ref: Very bad/somewhat bad)<br>Very good/somewhat good                                                                  | 1.08                         | 1.00                         |
| Relationship with your father growing up                                                 | (Ref: Very bad/somewhat bad)<br>Very good/somewhat good                                                                  | 1.11                         | 1.00                         |
| Parents married to each other when you were around 12 years old                          | (Ref: Parents married)<br>One or both of them had died<br>Parents were divorced<br>Parents were never married<br>Unsure  | 1.22<br>1.20<br>1.12<br>1.55 | 1.00<br>1.00<br>1.00<br>1.00 |
| Feelings about family household income when growing up                                   | (Ref: Got by)<br>Found it difficult<br>Found it very difficult<br>Lived comfortably                                      | 1.15<br>1.25<br>1.34         | 1.00<br>1.00<br>1.17         |
| Physically or sexually abused when growing up                                            | (Ref: No)                                                                                                                | 1.15                         | 1.00                         |
| Felt like an outsider in your family when growing up                                     | (Ref: No)<br>Yes                                                                                                         | 1.11                         | 1.00                         |
| Your health when growing up                                                              | (Ref: Good)<br>Excellent<br>Fair<br>Poor<br>Very good                                                                    | 1.12<br>1.11<br>1.25<br>1.10 | 1.00<br>1.00<br>1.00<br>1.00 |
| Born in This country                                                                     | (Ref: Born in this country)<br>Born in another country                                                                   | 2.04                         | 1.42                         |
| How Often You Attended Religious Services or Worshiped When You Were Around 12 Years Old | (Ref: Never)<br>At least once a week<br>Less than once a month<br>One to three times a month                             | 1.34<br>1.22<br>1.35         | 1.03<br>1.00<br>1.00         |
| Year of birth (age group)                                                                | (Ref: 1998-2005; current age: 18-24)<br>1943 or earlier (current age: 80+ years)<br>1943-1953 (current age: 70-79 years) | 1.18<br>1.20                 | 1.00<br>1.00                 |

| Variable                                                    | Category                                  | E-value for Estimate | E-value for 95% CI |
|-------------------------------------------------------------|-------------------------------------------|----------------------|--------------------|
|                                                             | 1953-1963 (current age: 60-69 years)      | 1.16                 | 1.00               |
|                                                             | 1963-1973 (current age: 50-59 years)      | 1.17                 | 1.00               |
|                                                             | 1973-1983 (current age: 40-49 years)      | 1.28                 | 1.00               |
|                                                             | 1983-1993 (current age: 30-39 years)      | 1.33                 | 1.00               |
|                                                             | 1993-1998 (current age: 25-29 years)      | 1.37                 | 1.00               |
| Religion when twelve years old                              | (Ref: No religion/Atheist/Agnostic)       |                      |                    |
|                                                             | Christianity                              | 1.32                 | 1.00               |
|                                                             | Collapsed affiliations with prevalence<3% | 1.41                 | 1.00               |
| Race plurality (prominent race/ethnic group [0] or not [1]) | (Ref: Plurality group)                    |                      |                    |
|                                                             | Non-plurality groups                      | 1.15                 | 1.00               |

**Table S4a. China: Demographic descriptive statistics**

| <b>Characteristic</b>                    | <b>N = 4,544<sup>1</sup></b> |
|------------------------------------------|------------------------------|
| <b>Age group</b>                         |                              |
| 1943 or earlier (current age: 80+ years) | 2 (<0.1%)                    |
| 1943-1953 (current age: 70-79 years)     | 133 (2.9%)                   |
| 1953-1963 (current age: 60-69 years)     | 865 (19%)                    |
| 1963-1973 (current age: 50-59 years)     | 770 (17%)                    |
| 1973-1983 (current age: 40-49 years)     | 917 (20%)                    |
| 1983-1993 (current age: 30-39 years)     | 822 (18%)                    |
| 1993-1998 (current age: 25-29 years)     | 549 (12%)                    |
| 1998-2005 (current age: 18-24 years)     | 485 (11%)                    |
| (Missing)                                | 0 (0%)                       |
| <b>Gender</b>                            |                              |
| 1. Male                                  | 2,300 (51%)                  |
| 2. Female                                | 2,244 (49%)                  |
| 3. Other                                 | 0 (0%)                       |
| (Missing)                                | 0 (0%)                       |
| <b>Marital status</b>                    |                              |
| 1. Single/Never been married             | 911 (20%)                    |
| 2. Married                               | 3,214 (71%)                  |
| 3. Separated                             | 32 (0.7%)                    |
| 4. Divorced                              | 107 (2.4%)                   |
| 5. Widowed                               | 145 (3.2%)                   |
| 6. Domestic partner                      | 132 (2.9%)                   |
| (Missing)                                | 3 (<0.1%)                    |
| <b>Employment</b>                        |                              |
| 1. Employed for an employer              | 1,728 (38%)                  |
| 2. Self-employed                         | 1,170 (26%)                  |
| 3. Retired                               | 833 (18%)                    |
| 4. Student                               | 180 (4.0%)                   |
| 5. Homemaker                             | 265 (5.8%)                   |
| 6. Unemployed and looking for a job      | 147 (3.2%)                   |
| 7. None of these/Other                   | 222 (4.9%)                   |
| (Missing)                                | 0 (0%)                       |
| <b>Religious service attendance</b>      |                              |
| 1. More than once a week                 | 47 (1.0%)                    |
| 2. Once a week                           | 170 (3.7%)                   |
| 3. One to three times a month            | 267 (5.9%)                   |
| 4. A few times a year                    | 528 (12%)                    |
| 5. Never                                 | 3,529 (78%)                  |
| (Missing)                                | 4 (<0.1%)                    |
| <b>Education</b>                         |                              |
| 1. Up to 8                               | 2,925 (64%)                  |
| 2. 9-15                                  | 1,191 (26%)                  |
| 3. 16+                                   | 428 (9.4%)                   |
| (Missing)                                | 0 (0%)                       |
| <b>Immigration</b>                       |                              |
| 1. Born in this country                  | 4,531 (100%)                 |
| 2. Born in another country               | 8 (0.2%)                     |

| <b>Characteristic</b>                                       | <b>N = 4,544<sup>1</sup></b> |
|-------------------------------------------------------------|------------------------------|
| (Missing)                                                   | 4 (<0.1%)                    |
| <b>Religious affiliation</b>                                |                              |
| 1. Christianity                                             | 126 (2.8%)                   |
| 10. Taoism                                                  | 110 (2.4%)                   |
| 11. Confucianism                                            | 13 (0.3%)                    |
| 12. Primal, Animist, or Folk religion                       | 19 (0.4%)                    |
| 13. Spiritism                                               | 0 (0%)                       |
| 14. Umbanda, Candomblé, and other African-derived religions | 0 (0%)                       |
| 15. Chinese folk/traditional religion                       | 124 (2.7%)                   |
| 2. Islam                                                    | 17 (0.4%)                    |
| 3. Hinduism                                                 | 0 (0%)                       |
| 4. Buddhism                                                 | 755 (17%)                    |
| 5. Judaism                                                  | 2 (<0.1%)                    |
| 6. Sikhism                                                  | 0 (0%)                       |
| 7. Baha'i                                                   | 0 (0%)                       |
| 8. Jainism                                                  | 0 (0%)                       |
| 9. Shinto                                                   | 5 (0.1%)                     |
| 96. Some other religion                                     | 0 (0%)                       |
| 97. No religion/Atheist/Agnostic                            | 3,361 (74%)                  |
| (Missing)                                                   | 13 (0.3%)                    |
| <b>RACE ETHNICITY</b>                                       |                              |
| (Missing)                                                   | 4,544 (100%)                 |
| <sup>1</sup> n (%)                                          |                              |

**Table S4b. China: Childhood descriptive statistics**

| <b>Characteristic</b>                      | <b>N = 4,544<sup>1</sup></b> |
|--------------------------------------------|------------------------------|
| <b>Age</b>                                 | 45 (15)                      |
| <b>Year of birth</b>                       |                              |
| 1943 or earlier (current age: 80+ years)   | 2 (<0.1%)                    |
| 1943-1953 (current age: 70-79 years)       | 133 (2.9%)                   |
| 1953-1963 (current age: 60-69 years)       | 865 (19%)                    |
| 1963-1973 (current age: 50-59 years)       | 770 (17%)                    |
| 1973-1983 (current age: 40-49 years)       | 917 (20%)                    |
| 1983-1993 (current age: 30-39 years)       | 822 (18%)                    |
| 1993-1998 (current age: 25-29 years)       | 549 (12%)                    |
| 1998-2005 (current age: 18-24 years)       | 485 (11%)                    |
| (Missing)                                  | 0 (0%)                       |
| <b>Gender</b>                              |                              |
| 1. Male                                    | 2,300 (51%)                  |
| 2. Female                                  | 2,244 (49%)                  |
| 3. Other                                   | 0 (0%)                       |
| (Missing)                                  | 0 (0%)                       |
| <b>Parent marital status</b>               |                              |
| 1. Parents were married                    | 4,236 (93%)                  |
| 2. Parents were divorced                   | 109 (2.4%)                   |
| 3. Parents were never married              | 28 (0.6%)                    |
| 4. One or both of them had died            | 121 (2.7%)                   |
| 5. Unsure                                  | 49 (1.1%)                    |
| (Missing)                                  | 1 (<0.1%)                    |
| <b>Age 12 religious service attendance</b> |                              |
| 1. At least once a week                    | 79 (1.7%)                    |
| 2. One to three times a month              | 288 (6.3%)                   |
| 3. Less than once a month                  | 560 (12%)                    |
| 4. Never                                   | 3,615 (80%)                  |
| (Missing)                                  | 2 (<0.1%)                    |
| <b>Relationship with mother</b>            |                              |
| 1. Very good                               | 1,884 (41%)                  |
| 2. Somewhat good                           | 2,116 (47%)                  |
| 3. Somewhat bad                            | 174 (3.8%)                   |
| 4. Very bad                                | 24 (0.5%)                    |
| 97. (Does not apply)                       | 347 (7.6%)                   |
| (Missing)                                  | 0 (0%)                       |
| <b>Relationship with father</b>            |                              |
| 1. Very good                               | 1,502 (33%)                  |
| 2. Somewhat good                           | 2,131 (47%)                  |
| 3. Somewhat bad                            | 384 (8.4%)                   |
| 4. Very bad                                | 44 (1.0%)                    |
| 97. (Does not apply)                       | 483 (11%)                    |
| (Missing)                                  | 1 (<0.1%)                    |
| <b>Outsider growing up</b>                 |                              |
| 1. Yes                                     | 545 (12%)                    |
| 2. No                                      | 3,927 (86%)                  |
| (Missing)                                  | 71 (1.6%)                    |

| Characteristic                                              | N = 4,544 <sup>1</sup> |
|-------------------------------------------------------------|------------------------|
| <b>Abuse</b>                                                |                        |
| 1. Yes                                                      | 241 (5.3%)             |
| 2. No                                                       | 4,301 (95%)            |
| (Missing)                                                   | 2 (<0.1%)              |
| <b>Self-rated health growing up</b>                         |                        |
| 1. Excellent                                                | 666 (15%)              |
| 2. Very good                                                | 1,748 (38%)            |
| 3. Good                                                     | 1,501 (33%)            |
| 4. Fair                                                     | 588 (13%)              |
| 5. Poor                                                     | 41 (0.9%)              |
| (Missing)                                                   | 0 (0%)                 |
| <b>Immigration status</b>                                   |                        |
| 1. Born in this country                                     | 4,531 (100%)           |
| 2. Born in another country                                  | 8 (0.2%)               |
| (Missing)                                                   | 4 (<0.1%)              |
| <b>Subjective financial status of family growing up</b>     |                        |
| 1. Lived comfortably                                        | 1,249 (27%)            |
| 2. Got by                                                   | 2,460 (54%)            |
| 3. Found it difficult                                       | 668 (15%)              |
| 4. Found it very difficult                                  | 166 (3.6%)             |
| (Missing)                                                   | 1 (<0.1%)              |
| <b>Religious affiliation</b>                                |                        |
| 1. Christianity                                             | 101 (2.2%)             |
| 10. Taoism                                                  | 93 (2.1%)              |
| 11. Confucianism                                            | 8 (0.2%)               |
| 12. Primal, Animist, or Folk religion                       | 12 (0.3%)              |
| 13. Spiritism                                               | 0 (0%)                 |
| 14. Umbanda, Candomblé, and other African-derived religions | 0 (0%)                 |
| 15. Chinese folk/traditional religion                       | 127 (2.8%)             |
| 2. Islam                                                    | 16 (0.3%)              |
| 3. Hinduism                                                 | 0 (0%)                 |
| 4. Buddhism                                                 | 608 (13%)              |
| 5. Judaism                                                  | 0 (0%)                 |
| 6. Sikhism                                                  | 0 (0%)                 |
| 7. Baha'i                                                   | 0 (0%)                 |
| 8. Jainism                                                  | 0 (0%)                 |
| 9. Shinto                                                   | 6 (0.1%)               |
| 96. Some other religion                                     | 1 (<0.1%)              |
| 97. No religion/Atheist/Agnostic                            | 3,551 (78%)            |
| (Missing)                                                   | 20 (0.4%)              |
| <b>Race/Ethnicity</b>                                       |                        |
| (Missing)                                                   | 4,544 (100%)           |

<sup>1</sup>Mean (SD); n (%)



**Table S4c. China: Proportions by demographic category**

| Variable                     | Category                                 | Proportion | 95% CI         | SE    | p-value  |
|------------------------------|------------------------------------------|------------|----------------|-------|----------|
| Age group                    | 1998-2005 (current age: 18-24 years)     | 0.870      | (0.839, 0.902) | 0.016 | < 1e-16  |
|                              | 1943 or earlier (current age: 80+ years) | 1.000      | *              | *     |          |
|                              | 1943-1953 (current age: 70-79 years)     | 0.817      | (0.732, 0.902) | 0.043 |          |
|                              | 1953-1963 (current age: 60-69 years)     | 0.830      | (0.799, 0.860) | 0.016 |          |
|                              | 1963-1973 (current age: 50-59 years)     | 0.832      | (0.802, 0.862) | 0.015 |          |
|                              | 1973-1983 (current age: 40-49 years)     | 0.812      | (0.785, 0.839) | 0.014 |          |
|                              | 1983-1993 (current age: 30-39 years)     | 0.807      | (0.778, 0.836) | 0.015 |          |
|                              | 1993-1998 (current age: 25-29 years)     | 0.820      | (0.785, 0.855) | 0.018 |          |
|                              | Male                                     | 0.795      | (0.775, 0.814) | 0.010 |          |
|                              | Female                                   | 0.857      | (0.842, 0.872) | 0.008 |          |
| Gender                       | Other                                    | *          | *              | *     | 6.38e-07 |
| Marital status               | Single/Never been married                | 0.822      | (0.797, 0.848) | 0.013 | 2.19e-01 |
|                              | Divorced                                 | 0.905      | (0.841, 0.970) | 0.032 |          |
|                              | Domestic partner                         | 0.827      | (0.758, 0.896) | 0.035 |          |
|                              | Married                                  | 0.822      | (0.807, 0.838) | 0.008 |          |
|                              | Separated                                | 0.876      | (0.748, 1.000) | 0.062 |          |
|                              | Widowed                                  | 0.836      | (0.764, 0.908) | 0.036 |          |
|                              | Employed for an employer                 | 0.813      | (0.792, 0.834) | 0.011 | 1.15e-03 |
| Employment                   | Homemaker                                | 0.814      | (0.769, 0.859) | 0.023 |          |
|                              | None of these/Other                      | 0.773      | (0.723, 0.823) | 0.025 |          |
|                              | Retired                                  | 0.843      | (0.815, 0.871) | 0.014 |          |
|                              | Self-employed                            | 0.852      | (0.828, 0.876) | 0.012 |          |
|                              | Student                                  | 0.854      | (0.804, 0.903) | 0.025 |          |
|                              | Unemployed and looking for a job         | 0.721      | (0.651, 0.790) | 0.035 |          |
| Religious service attendance | Never                                    | 0.808      | (0.793, 0.822) | 0.007 | 1.90e-12 |
|                              | A few times a year                       | 0.860      | (0.829, 0.891) | 0.016 |          |
|                              | More than once a week                    | 0.922      | (0.840, 1.000) | 0.041 |          |
|                              | Once a week                              | 0.883      | (0.818, 0.948) | 0.033 |          |
|                              | One to three times a month               | 0.933      | (0.902, 0.965) | 0.016 |          |
| Education                    | 9-15                                     | 0.835      | (0.805, 0.864) | 0.015 | 6.97e-03 |
|                              | 16+                                      | 0.865      | (0.837, 0.892) | 0.014 |          |

| Variable                 | Category                                                          | Proportion | 95% CI         | SE    | p-value  |
|--------------------------|-------------------------------------------------------------------|------------|----------------|-------|----------|
| Immigration status       | Up to 8<br>Born in this<br>country                                | 0.816      | (0.801, 0.830) | 0.007 | 6.32e-01 |
|                          | Born in another<br>country                                        | 0.825      | (0.813, 0.838) | 0.006 |          |
|                          | No<br>religion/Atheist/Ag<br>nostic                               | 0.880      | (0.571, 1.000) | 0.115 |          |
| Religious<br>affiliation | Christianity                                                      | 0.811      | (0.796, 0.825) | 0.008 | 8.03e-05 |
|                          | Combined<br>Spiritism                                             | *          | *              | *     |          |
|                          | Umbanda,<br>Candomblé, and<br>other African-<br>derived religions | *          | *              | *     |          |
|                          | Buddhism                                                          | 0.863      | (0.835, 0.892) | 0.014 |          |
|                          | Islam                                                             | *          | *              | *     |          |
|                          | Chinese<br>folk/traditional<br>religion                           | *          | *              | *     |          |
|                          | Hinduism                                                          | *          | *              | *     |          |
|                          | Judaism                                                           | *          | *              | *     |          |
|                          | Primal, Animist, or<br>Folk religion                              | *          | *              | *     |          |
|                          |                                                                   |            |                |       |          |
|                          |                                                                   |            |                |       |          |
|                          |                                                                   |            |                |       |          |
|                          |                                                                   |            |                |       |          |

**Table S4d. China: Childhood predictors regression analysis**

| Variable                                                        | Category                     | Risk-Ratio | logRR SE | RR 95% CI   | Global p-value |
|-----------------------------------------------------------------|------------------------------|------------|----------|-------------|----------------|
| Relationship with your mother growing up                        | (Ref: Very bad/somewhat bad) |            |          |             | 0.501          |
|                                                                 | Very good/somewhat good      | 1.014      | 0.024    | (0.97,1.06) |                |
| Relationship with your father growing up                        | (Ref: Very bad/somewhat bad) |            |          |             | 0.476          |
|                                                                 | Very good/somewhat good      | 1.014      | 0.021    | (0.97,1.06) |                |
| Parents married to each other when you were around 12 years old | (Ref: Parents married)       |            |          |             | 0.153          |
|                                                                 | One or both of them had died | 0.943      | 0.043    | (0.87,1.03) |                |
|                                                                 | Parents were divorced        | 0.923      | 0.042    | (0.85,1.00) |                |
|                                                                 | Parents were never married   | 0.970      | 0.082    | (0.83,1.14) |                |
|                                                                 | Unsure                       | 0.855      | 0.090    | (0.72,1.02) |                |
| Feelings about familys household income when growing up         | (Ref: Got by)                |            |          |             | 0.059          |
|                                                                 | Found it difficult           | 0.993      | 0.019    | (0.96,1.03) |                |
|                                                                 | Found it very difficult      | 0.982      | 0.034    | (0.92,1.05) |                |
|                                                                 | Lived comfortably            | 1.037      | 0.015    | (1.01,1.07) |                |
| Physically or sexually abused when growing up                   | (Ref: No)                    |            |          |             | 0.452          |
|                                                                 |                              | 1.020      | 0.027    | (0.97,1.08) |                |
| Felt like an outsider in your family when growing up            | (Ref: No)                    |            |          |             | 0.613          |
|                                                                 | Yes                          | 1.000      | 0.019    | (0.96,1.04) |                |
| Your health when growing up                                     | (Ref: Good)                  |            |          |             | 0.512          |
|                                                                 | Excellent                    | 0.978      | 0.022    | (0.94,1.02) |                |
|                                                                 | Fair                         | 1.020      | 0.021    | (0.98,1.06) |                |
|                                                                 | Poor                         | 0.941      | 0.077    | (0.81,1.09) |                |
| Born in This                                                    | Very good                    | 1.018      | 0.016    | (0.99,1.05) | 0.602          |
|                                                                 | (Ref: Born in this           |            |          |             |                |

| Variable                                                                                  | Category                                  | Risk-Ratio | logRR SE | RR 95% CI   | Global p-value |
|-------------------------------------------------------------------------------------------|-------------------------------------------|------------|----------|-------------|----------------|
| country                                                                                   | country)                                  |            |          |             |                |
|                                                                                           | Born in another country                   | 1.010      | 0.110    | (0.81,1.25) |                |
| How Often You Attended Religious Services or Worshipped When You Were Around 12 Years Old | (Ref: Never)                              |            |          |             | 0.001          |
|                                                                                           | At least once a week                      | 1.098      | 0.040    | (1.02,1.19) |                |
|                                                                                           | Less than once a month                    | 1.029      | 0.024    | (0.98,1.08) |                |
|                                                                                           | One to three times a month                | 1.113      | 0.030    | (1.05,1.18) |                |
| Year of birth (age group)                                                                 | (Ref: 1998-2005; current age: 18-24)      |            |          |             | 0.005          |
|                                                                                           | 1943 or earlier (current age: 80+ years)  | 1.278      | 0.074    | (1.11,1.48) |                |
|                                                                                           | 1943-1953 (current age: 70-79 years)      | 0.962      | 0.046    | (0.88,1.05) |                |
|                                                                                           | 1953-1963 (current age: 60-69 years)      | 0.968      | 0.023    | (0.92,1.01) |                |
|                                                                                           | 1963-1973 (current age: 50-59 years)      | 0.969      | 0.022    | (0.93,1.01) |                |
|                                                                                           | 1973-1983 (current age: 40-49 years)      | 0.946      | 0.021    | (0.91,0.99) |                |
|                                                                                           | 1983-1993 (current age: 30-39 years)      | 0.941      | 0.022    | (0.90,0.98) |                |
|                                                                                           | 1993-1998 (current age: 25-29 years)      | 0.951      | 0.024    | (0.91,1.00) |                |
| Religion when twelve years old                                                            | (Ref:)                                    |            |          |             | 0.712          |
|                                                                                           | Buddhism                                  | 1.005      | 0.026    | (0.96,1.06) |                |
|                                                                                           | Collapsed affiliations with prevalence<3% | 1.002      | 0.028    | (0.95,1.06) |                |

**Table S4e. China: Sensitivity to unmeasured confounding of childhood predictors**

| Variable                                                                                 | Category                                                                                                                 | E-value for Estimate         | E-value for 95% CI           |
|------------------------------------------------------------------------------------------|--------------------------------------------------------------------------------------------------------------------------|------------------------------|------------------------------|
| Relationship with your mother growing up                                                 | (Ref: Very bad/somewhat bad)<br>Very good/somewhat good                                                                  | 1.13                         | 1.00                         |
| Relationship with your father growing up                                                 | (Ref: Very bad/somewhat bad)<br>Very good/somewhat good                                                                  | 1.13                         | 1.00                         |
| Parents married to each other when you were around 12 years old                          | (Ref: Parents married)<br>One or both of them had died<br>Parents were divorced<br>Parents were never married<br>Unsure  | 1.31<br>1.38<br>1.21<br>1.62 | 1.00<br>1.00<br>1.00<br>1.00 |
| Feelings about family household income when growing up                                   | (Ref: Got by)<br>Found it difficult<br>Found it very difficult<br>Lived comfortably                                      | 1.09<br>1.16<br>1.23         | 1.00<br>1.00<br>1.09         |
| Physically or sexually abused when growing up                                            | (Ref: No)                                                                                                                | 1.16                         | 1.00                         |
| Felt like an outsider in your family when growing up                                     | (Ref: No)<br>Yes                                                                                                         | 1.02                         | 1.00                         |
| Your health when growing up                                                              | (Ref: Good)<br>Excellent<br>Fair<br>Poor<br>Very good                                                                    | 1.18<br>1.16<br>1.32<br>1.15 | 1.00<br>1.00<br>1.00<br>1.00 |
| Born in This country                                                                     | (Ref: Born in this country)<br>Born in another country                                                                   | 1.11                         | 1.00                         |
| How Often You Attended Religious Services or Worshiped When You Were Around 12 Years Old | (Ref: Never)<br>At least once a week<br>Less than once a month<br>One to three times a month                             | 1.43<br>1.20<br>1.47         | 1.14<br>1.00<br>1.27         |
| Year of birth (age group)                                                                | (Ref: 1998-2005; current age: 18-24)<br>1943 or earlier (current age: 80+ years)<br>1943-1953 (current age: 70-79 years) | 1.87<br>1.24                 | 1.45<br>1.00                 |

| Variable                       | Category                                  | E-value for Estimate | E-value for 95% CI |
|--------------------------------|-------------------------------------------|----------------------|--------------------|
|                                | 1953-1963 (current age: 60-69 years)      | 1.22                 | 1.00               |
|                                | 1963-1973 (current age: 50-59 years)      | 1.21                 | 1.00               |
|                                | 1973-1983 (current age: 40-49 years)      | 1.30                 | 1.13               |
|                                | 1983-1993 (current age: 30-39 years)      | 1.32                 | 1.16               |
|                                | 1993-1998 (current age: 25-29 years)      | 1.28                 | 1.06               |
| Religion when twelve years old | (Ref:)                                    |                      |                    |
|                                | Buddhism                                  | 1.07                 | 1.00               |
|                                | Collapsed affiliations with prevalence<3% | 1.05                 | 1.00               |

**Table S5a. Egypt: Demographic descriptive statistics**

| <b>Characteristic</b>                    | <b>N = 3,386<sup>1</sup></b> |
|------------------------------------------|------------------------------|
| <b>Age group</b>                         |                              |
| 1943 or earlier (current age: 80+ years) | 3 (<0.1%)                    |
| 1943-1953 (current age: 70-79 years)     | 30 (0.9%)                    |
| 1953-1963 (current age: 60-69 years)     | 274 (8.1%)                   |
| 1963-1973 (current age: 50-59 years)     | 410 (12%)                    |
| 1973-1983 (current age: 40-49 years)     | 577 (17%)                    |
| 1983-1993 (current age: 30-39 years)     | 836 (25%)                    |
| 1993-1998 (current age: 25-29 years)     | 419 (12%)                    |
| 1998-2005 (current age: 18-24 years)     | 836 (25%)                    |
| (Missing)                                | 0 (0%)                       |
| <b>Gender</b>                            |                              |
| 1. Male                                  | 1,745 (52%)                  |
| 2. Female                                | 1,641 (48%)                  |
| 3. Other                                 | 0 (0%)                       |
| (Missing)                                | 0 (<0.1%)                    |
| <b>Marital status</b>                    |                              |
| 1. Single/Never been married             | 791 (23%)                    |
| 2. Married                               | 2,316 (68%)                  |
| 3. Separated                             | 29 (0.9%)                    |
| 4. Divorced                              | 71 (2.1%)                    |
| 5. Widowed                               | 174 (5.1%)                   |
| 6. Domestic partner                      | 0 (0%)                       |
| (Missing)                                | 6 (0.2%)                     |
| <b>Employment</b>                        |                              |
| 1. Employed for an employer              | 925 (27%)                    |
| 2. Self-employed                         | 618 (18%)                    |
| 3. Retired                               | 173 (5.1%)                   |
| 4. Student                               | 281 (8.3%)                   |
| 5. Homemaker                             | 1,205 (36%)                  |
| 6. Unemployed and looking for a job      | 169 (5.0%)                   |
| 7. None of these/Other                   | 14 (0.4%)                    |
| (Missing)                                | 0 (<0.1%)                    |
| <b>Religious service attendance</b>      |                              |
| 1. More than once a week                 | 620 (18%)                    |
| 2. Once a week                           | 666 (20%)                    |
| 3. One to three times a month            | 267 (7.9%)                   |
| 4. A few times a year                    | 364 (11%)                    |
| 5. Never                                 | 1,459 (43%)                  |
| (Missing)                                | 10 (0.3%)                    |
| <b>Education</b>                         |                              |
| 1. Up to 8                               | 1,886 (56%)                  |
| 2. 9-15                                  | 1,077 (32%)                  |
| 3. 16+                                   | 423 (12%)                    |
| (Missing)                                | 1 (<0.1%)                    |
| <b>Immigration</b>                       |                              |
| 1. Born in this country                  | 3,375 (100%)                 |
| 2. Born in another country               | 10 (0.3%)                    |

| <b>Characteristic</b>                                       | <b>N = 3,386<sup>1</sup></b> |
|-------------------------------------------------------------|------------------------------|
| (Missing)                                                   | 1 (<0.1%)                    |
| <b>Religious affiliation</b>                                |                              |
| 1. Christianity                                             | 81 (2.4%)                    |
| 10. Taoism                                                  | 0 (<0.1%)                    |
| 11. Confucianism                                            | 0 (0%)                       |
| 12. Primal, Animist, or Folk religion                       | 0 (0%)                       |
| 13. Spiritism                                               | 0 (0%)                       |
| 14. Umbanda, Candomblé, and other African-derived religions | 0 (0%)                       |
| 15. Chinese folk/traditional religion                       | 0 (0%)                       |
| 2. Islam                                                    | 3,303 (98%)                  |
| 3. Hinduism                                                 | 0 (0%)                       |
| 4. Buddhism                                                 | 0 (0%)                       |
| 5. Judaism                                                  | 0 (0%)                       |
| 6. Sikhism                                                  | 0 (0%)                       |
| 7. Baha'i                                                   | 0 (0%)                       |
| 8. Jainism                                                  | 0 (0%)                       |
| 9. Shinto                                                   | 0 (0%)                       |
| 96. Some other religion                                     | 0 (0%)                       |
| 97. No religion/Atheist/Agnostic                            | 0 (0%)                       |
| (Missing)                                                   | 1 (<0.1%)                    |
| <b>RACE ETHNICITY</b>                                       |                              |
| (Missing)                                                   | 78 (2.3%)                    |
| 401. Egypt: Arab                                            | 3,282 (97%)                  |
| 402. Egypt: Turkish                                         | 4 (0.1%)                     |
| 403. Egypt: Greek                                           | 1 (<0.1%)                    |
| 405. Egypt: Bedouin Arab                                    | 4 (0.1%)                     |
| 407. Egypt: Nubian                                          | 17 (0.5%)                    |
| <sup>1</sup> n (%)                                          |                              |

**Table S5b. Egypt: Childhood descriptive statistics**

| <b>Characteristic</b>                      | <b>N = 3,386<sup>1</sup></b> |
|--------------------------------------------|------------------------------|
| <b>Age</b>                                 | 37 (14)                      |
| <b>Year of birth</b>                       |                              |
| 1943 or earlier (current age: 80+ years)   | 3 (<0.1%)                    |
| 1943-1953 (current age: 70-79 years)       | 30 (0.9%)                    |
| 1953-1963 (current age: 60-69 years)       | 274 (8.1%)                   |
| 1963-1973 (current age: 50-59 years)       | 410 (12%)                    |
| 1973-1983 (current age: 40-49 years)       | 577 (17%)                    |
| 1983-1993 (current age: 30-39 years)       | 836 (25%)                    |
| 1993-1998 (current age: 25-29 years)       | 419 (12%)                    |
| 1998-2005 (current age: 18-24 years)       | 836 (25%)                    |
| (Missing)                                  | 0 (0%)                       |
| <b>Gender</b>                              |                              |
| 1. Male                                    | 1,745 (52%)                  |
| 2. Female                                  | 1,641 (48%)                  |
| 3. Other                                   | 0 (0%)                       |
| (Missing)                                  | 0 (<0.1%)                    |
| <b>Parent marital status</b>               |                              |
| 1. Parents were married                    | 2,897 (86%)                  |
| 2. Parents were divorced                   | 107 (3.1%)                   |
| 3. Parents were never married              | 4 (0.1%)                     |
| 4. One or both of them had died            | 339 (10.0%)                  |
| 5. Unsure                                  | 28 (0.8%)                    |
| (Missing)                                  | 12 (0.3%)                    |
| <b>Age 12 religious service attendance</b> |                              |
| 1. At least once a week                    | 1,649 (49%)                  |
| 2. One to three times a month              | 435 (13%)                    |
| 3. Less than once a month                  | 446 (13%)                    |
| 4. Never                                   | 817 (24%)                    |
| (Missing)                                  | 39 (1.2%)                    |
| <b>Relationship with mother</b>            |                              |
| 1. Very good                               | 2,966 (88%)                  |
| 2. Somewhat good                           | 347 (10%)                    |
| 3. Somewhat bad                            | 14 (0.4%)                    |
| 4. Very bad                                | 6 (0.2%)                     |
| 97. (Does not apply)                       | 53 (1.6%)                    |
| (Missing)                                  | 0 (0%)                       |
| <b>Relationship with father</b>            |                              |
| 1. Very good                               | 2,648 (78%)                  |
| 2. Somewhat good                           | 492 (15%)                    |
| 3. Somewhat bad                            | 53 (1.6%)                    |
| 4. Very bad                                | 25 (0.7%)                    |
| 97. (Does not apply)                       | 157 (4.6%)                   |
| (Missing)                                  | 12 (0.3%)                    |
| <b>Outsider growing up</b>                 |                              |
| 1. Yes                                     | 182 (5.4%)                   |
| 2. No                                      | 3,193 (94%)                  |
| (Missing)                                  | 11 (0.3%)                    |

| <b>Characteristic</b>                                       | <b>N = 3,386<sup>1</sup></b> |
|-------------------------------------------------------------|------------------------------|
| <b>Abuse</b>                                                |                              |
| 1. Yes                                                      | 278 (8.2%)                   |
| 2. No                                                       | 3,092 (91%)                  |
| (Missing)                                                   | 16 (0.5%)                    |
| <b>Self-rated health growing up</b>                         |                              |
| 1. Excellent                                                | 1,885 (56%)                  |
| 2. Very good                                                | 882 (26%)                    |
| 3. Good                                                     | 343 (10%)                    |
| 4. Fair                                                     | 199 (5.9%)                   |
| 5. Poor                                                     | 76 (2.3%)                    |
| (Missing)                                                   | 1 (<0.1%)                    |
| <b>Immigration status</b>                                   |                              |
| 1. Born in this country                                     | 3,375 (100%)                 |
| 2. Born in another country                                  | 10 (0.3%)                    |
| (Missing)                                                   | 1 (<0.1%)                    |
| <b>Subjective financial status of family growing up</b>     |                              |
| 1. Lived comfortably                                        | 923 (27%)                    |
| 2. Got by                                                   | 1,650 (49%)                  |
| 3. Found it difficult                                       | 630 (19%)                    |
| 4. Found it very difficult                                  | 183 (5.4%)                   |
| (Missing)                                                   | 0 (<0.1%)                    |
| <b>Religious affiliation</b>                                |                              |
| 1. Christianity                                             | 84 (2.5%)                    |
| 10. Taoism                                                  | 0 (<0.1%)                    |
| 11. Confucianism                                            | 0 (0%)                       |
| 12. Primal, Animist, or Folk religion                       | 0 (0%)                       |
| 13. Spiritism                                               | 0 (0%)                       |
| 14. Umbanda, Candomblé, and other African-derived religions | 0 (0%)                       |
| 15. Chinese folk/traditional religion                       | 0 (0%)                       |
| 2. Islam                                                    | 3,301 (98%)                  |
| 3. Hinduism                                                 | 0 (0%)                       |
| 4. Buddhism                                                 | 0 (0%)                       |
| 5. Judaism                                                  | 0 (0%)                       |
| 6. Sikhism                                                  | 0 (0%)                       |
| 7. Baha'i                                                   | 0 (0%)                       |
| 8. Jainism                                                  | 0 (<0.1%)                    |
| 9. Shinto                                                   | 0 (0%)                       |
| 96. Some other religion                                     | 0 (0%)                       |
| 97. No religion/Atheist/Agnostic                            | 0 (0%)                       |
| (Missing)                                                   | 0 (0%)                       |
| <b>Race/Ethnicity</b>                                       |                              |
| (Missing)                                                   | 78 (2.3%)                    |
| 401. Egypt: Arab                                            | 3,282 (97%)                  |
| 402. Egypt: Turkish                                         | 4 (0.1%)                     |
| 403. Egypt: Greek                                           | 1 (<0.1%)                    |
| 405. Egypt: Bedouin Arab                                    | 4 (0.1%)                     |
| 407. Egypt: Nubian                                          | 17 (0.5%)                    |

**Characteristic**

**N = 3,386<sup>1</sup>**

<sup>1</sup>Mean (SD); n (%)

**Table S5c. Egypt: Proportions by demographic category**

| Variable                     | Category                                 | Proportion | 95% CI         | SE    | p-value  |
|------------------------------|------------------------------------------|------------|----------------|-------|----------|
| Age group                    | 1998-2005 (current age: 18-24 years)     | 0.811      | (0.770, 0.851) | 0.021 | < 1e-16  |
|                              | 1943 or earlier (current age: 80+ years) | 1.000      | *              | *     |          |
|                              | 1943-1953 (current age: 70-79 years)     | 0.726      | (0.476, 0.976) | 0.120 |          |
|                              | 1953-1963 (current age: 60-69 years)     | 0.661      | (0.568, 0.754) | 0.047 |          |
|                              | 1963-1973 (current age: 50-59 years)     | 0.727      | (0.673, 0.781) | 0.028 |          |
|                              | 1973-1983 (current age: 40-49 years)     | 0.707      | (0.662, 0.753) | 0.023 |          |
|                              | 1983-1993 (current age: 30-39 years)     | 0.718      | (0.679, 0.757) | 0.020 |          |
|                              | 1993-1998 (current age: 25-29 years)     | 0.767      | (0.714, 0.820) | 0.027 |          |
|                              | Male                                     | 0.759      | (0.730, 0.788) | 0.015 |          |
|                              | Female                                   | 0.724      | (0.697, 0.751) | 0.014 |          |
| Gender                       | Other                                    | *          | *              | *     | 5.22e-02 |
|                              | Single/Never been married                | 0.815      | (0.773, 0.857) | 0.021 |          |
|                              | Divorced                                 | 0.867      | (0.764, 0.969) | 0.051 |          |
| Marital status               | Domestic partner                         | *          | *              | *     | 1.39e-04 |
|                              | Married                                  | 0.716      | (0.690, 0.741) | 0.013 |          |
|                              | Separated                                | 0.800      | (0.602, 0.999) | 0.096 |          |
|                              | Widowed                                  | 0.698      | (0.600, 0.797) | 0.050 |          |
|                              | Employed for an employer                 | 0.743      | (0.704, 0.781) | 0.020 |          |
|                              | Homemaker                                | 0.697      | (0.662, 0.732) | 0.018 |          |
|                              | None of these/Other                      | 0.846      | (0.545, 1.000) | 0.117 |          |
| Employment                   | Retired                                  | 0.678      | (0.577, 0.779) | 0.051 | 5.41e-05 |
|                              | Self-employed                            | 0.797      | (0.754, 0.839) | 0.022 |          |
|                              | Student                                  | 0.847      | (0.787, 0.906) | 0.030 |          |
|                              | Unemployed and looking for a job         | 0.741      | (0.655, 0.827) | 0.044 |          |
|                              | Never                                    | 0.721      | (0.689, 0.752) | 0.016 |          |
|                              | A few times a year                       | 0.777      | (0.723, 0.830) | 0.027 |          |
|                              | More than once a week                    | 0.739      | (0.690, 0.787) | 0.025 |          |
| Religious service attendance | Once a week                              | 0.761      | (0.712, 0.809) | 0.025 | 3.74e-01 |
|                              | One to three times a month               | 0.771      | (0.697, 0.845) | 0.038 |          |
|                              | 9-15                                     | 0.792      | (0.764, 0.819) | 0.014 |          |
| Education                    | 16+                                      | 0.855      | (0.806, 0.904) | 0.025 | 4.80e-09 |

| Variable              | Category            | Proportion | 95% CI         | SE    | p-value  |
|-----------------------|---------------------|------------|----------------|-------|----------|
| Immigration status    | Up to 8             | 0.688      | (0.656, 0.721) | 0.016 | 5.76e-01 |
|                       | Born in this        |            |                |       |          |
|                       | country             | 0.742      | (0.720, 0.764) | 0.011 |          |
|                       | Born in another     |            |                |       |          |
| Religious affiliation | country             | 0.829      | (0.449, 1.000) | 0.154 | 3.94e-01 |
|                       | No                  |            |                |       |          |
|                       | religion/Atheist/Ag |            |                |       |          |
|                       | nostic              | *          | *              | *     |          |
|                       | Christianity        | *          | *              | *     |          |
|                       | Combined            | 0.686      | (0.550, 0.821) | 0.068 |          |
|                       | Spiritism           | *          | *              | *     |          |
|                       | Umbanda,            |            |                |       |          |
|                       | Candomblé, and      |            |                |       |          |
|                       | other African-      |            |                |       |          |
|                       | derived religions   | *          | *              | *     |          |
|                       | Buddhism            | *          | *              | *     |          |
|                       | Islam               | 0.743      | (0.722, 0.765) | 0.011 |          |
|                       | Chinese             |            |                |       |          |
|                       | folk/traditional    |            |                |       |          |
|                       | religion            | *          | *              | *     |          |
|                       | Hinduism            | *          | *              | *     |          |
|                       | Judaism             | *          | *              | *     |          |
|                       | Primal, Animist, or |            |                |       |          |
|                       | Folk religion       | *          | *              | *     |          |

**Table S5d. Egypt: Childhood predictors regression analysis**

| Variable                                                        | Category                     | Risk-Ratio | logRR SE | RR 95% CI   | Global p-value |
|-----------------------------------------------------------------|------------------------------|------------|----------|-------------|----------------|
| Relationship with your mother growing up                        | (Ref: Very bad/somewhat bad) |            |          |             | 0.535          |
|                                                                 | Very good/somewhat good      | 1.049      | 0.108    | (0.85,1.30) |                |
| Relationship with your father growing up                        | (Ref: Very bad/somewhat bad) |            |          |             | 0.048          |
|                                                                 | Very good/somewhat good      | 0.907      | 0.048    | (0.82,1.00) |                |
| Parents married to each other when you were around 12 years old | (Ref: Parents married)       |            |          |             | 0.215          |
|                                                                 | One or both of them had died | 1.029      | 0.037    | (0.96,1.11) |                |
|                                                                 | Parents were divorced        | 0.915      | 0.066    | (0.80,1.04) |                |
|                                                                 | Parents were never married   | 1.184      | 0.087    | (1.00,1.41) |                |
|                                                                 | Unsure                       | 1.050      | 0.100    | (0.86,1.28) |                |
| Feelings about familys household income when growing up         | (Ref: Got by)                |            |          |             | 0.527          |
|                                                                 | Found it difficult           | 0.981      | 0.026    | (0.93,1.03) |                |
|                                                                 | Found it very difficult      | 0.950      | 0.042    | (0.88,1.03) |                |
|                                                                 | Lived comfortably            | 0.996      | 0.023    | (0.95,1.04) |                |
| Physically or sexually abused when growing up                   | (Ref: No)                    |            |          |             | 0.249          |
|                                                                 |                              | 0.957      | 0.035    | (0.89,1.02) |                |
| Felt like an outsider in your family when growing up            | (Ref: No)                    |            |          |             | 0.596          |
|                                                                 | Yes                          | 0.995      | 0.043    | (0.91,1.08) |                |
| Your health when growing up                                     | (Ref: Good)                  |            |          |             | 0.096          |
|                                                                 | Excellent                    | 1.075      | 0.039    | (0.99,1.16) |                |
|                                                                 | Fair                         | 1.106      | 0.054    | (0.99,1.23) |                |
|                                                                 | Poor                         | 1.117      | 0.072    | (0.97,1.28) |                |
| Born in This                                                    | Very good                    | 1.076      | 0.039    | (1.00,1.16) | 0.555          |
|                                                                 | (Ref: Born in this           |            |          |             |                |

| Variable                                                                                  | Category                                  | Risk-Ratio | logRR SE | RR 95% CI   | Global p-value |
|-------------------------------------------------------------------------------------------|-------------------------------------------|------------|----------|-------------|----------------|
| country                                                                                   | country)                                  |            |          |             |                |
|                                                                                           | Born in another country                   | 1.059      | 0.162    | (0.77,1.46) |                |
| How Often You Attended Religious Services or Worshipped When You Were Around 12 Years Old | (Ref: Never)                              |            |          |             | 0.012          |
|                                                                                           | At least once a week                      | 1.072      | 0.026    | (1.02,1.13) |                |
|                                                                                           | Less than once a month                    | 1.047      | 0.037    | (0.97,1.13) |                |
|                                                                                           | One to three times a month                | 1.087      | 0.032    | (1.02,1.16) |                |
| Year of birth (age group)                                                                 | (Ref: 1998-2005; current age: 18-24)      |            |          |             | 4.44e-11       |
|                                                                                           | 1943 or earlier (current age: 80+ years)  | 1.251      | 0.032    | (1.17,1.33) |                |
|                                                                                           | 1943-1953 (current age: 70-79 years)      | 0.930      | 0.127    | (0.72,1.19) |                |
|                                                                                           | 1953-1963 (current age: 60-69 years)      | 0.868      | 0.050    | (0.79,0.96) |                |
|                                                                                           | 1963-1973 (current age: 50-59 years)      | 0.929      | 0.034    | (0.87,0.99) |                |
|                                                                                           | 1973-1983 (current age: 40-49 years)      | 0.907      | 0.029    | (0.86,0.96) |                |
|                                                                                           | 1983-1993 (current age: 30-39 years)      | 0.914      | 0.029    | (0.86,0.97) |                |
|                                                                                           | 1993-1998 (current age: 25-29 years)      | 0.953      | 0.034    | (0.89,1.02) |                |
| Religion when twelve years old                                                            | (Ref: Islam)                              |            |          |             | 0.350          |
|                                                                                           | Collapsed affiliations with prevalence<3% | 0.934      | 0.067    | (0.82,1.06) |                |
| Race plurality (prominent race/ethnic group [0] or not [1])                               | (Ref: Plurality group)                    |            |          |             | 0.494          |
|                                                                                           | Non-plurality groups                      | 0.965      | 0.059    | (0.86,1.08) |                |

**Table S5e. Egypt: Sensitivity to unmeasured confounding of childhood predictors**

| Variable                                                                                 | Category                                 | E-value for Estimate | E-value for 95% CI |
|------------------------------------------------------------------------------------------|------------------------------------------|----------------------|--------------------|
| Relationship with your mother growing up                                                 | (Ref: Very bad/somewhat bad)             |                      |                    |
|                                                                                          | Very good/somewhat good                  | 1.28                 | 1.00               |
| Relationship with your father growing up                                                 | (Ref: Very bad/somewhat bad)             |                      |                    |
|                                                                                          | Very good/somewhat good                  | 1.44                 | 1.06               |
| Parents married to each other when you were around 12 years old                          | (Ref: Parents married)                   |                      |                    |
|                                                                                          | One or both of them had died             | 1.20                 | 1.00               |
|                                                                                          | Parents were divorced                    | 1.41                 | 1.00               |
|                                                                                          | Parents were never married               | 1.65                 | 1.00               |
|                                                                                          | Unsure                                   | 1.28                 | 1.00               |
| Feelings about familys household income when growing up                                  | (Ref: Got by)                            |                      |                    |
|                                                                                          | Found it difficult                       | 1.16                 | 1.00               |
|                                                                                          | Found it very difficult                  | 1.29                 | 1.00               |
|                                                                                          | Lived comfortably                        | 1.07                 | 1.00               |
| Physically or sexually abused when growing up                                            | (Ref: No)                                |                      |                    |
|                                                                                          |                                          | 1.26                 | 1.00               |
| Felt like an outsider in your family when growing up                                     | (Ref: No)                                |                      |                    |
|                                                                                          | Yes                                      | 1.08                 | 1.00               |
| Your health when growing up                                                              | (Ref: Good)                              |                      |                    |
|                                                                                          | Excellent                                | 1.36                 | 1.00               |
|                                                                                          | Fair                                     | 1.45                 | 1.00               |
|                                                                                          | Poor                                     | 1.48                 | 1.00               |
|                                                                                          | Very good                                | 1.36                 | 1.00               |
| Born in This country                                                                     | (Ref: Born in this country)              |                      |                    |
|                                                                                          | Born in another country                  | 1.31                 | 1.00               |
| How Often You Attended Religious Services or Worshiped When You Were Around 12 Years Old | (Ref: Never)                             |                      |                    |
|                                                                                          | At least once a week                     | 1.35                 | 1.16               |
|                                                                                          | Less than once a month                   | 1.27                 | 1.00               |
|                                                                                          | One to three times a month               | 1.39                 | 1.17               |
| Year of birth (age group)                                                                | (Ref: 1998-2005; current age: 18-24)     |                      |                    |
|                                                                                          | 1943 or earlier (current age: 80+ years) | 1.81                 | 1.63               |
|                                                                                          | 1943-1953 (current age: 70-79 years)     | 1.36                 | 1.00               |

| Variable                                                    | Category                                  | E-value for Estimate | E-value for 95% CI |
|-------------------------------------------------------------|-------------------------------------------|----------------------|--------------------|
|                                                             | 1953-1963 (current age: 60-69 years)      | 1.57                 | 1.26               |
|                                                             | 1963-1973 (current age: 50-59 years)      | 1.36                 | 1.09               |
|                                                             | 1973-1983 (current age: 40-49 years)      | 1.44                 | 1.25               |
|                                                             | 1983-1993 (current age: 30-39 years)      | 1.41                 | 1.22               |
|                                                             | 1993-1998 (current age: 25-29 years)      | 1.28                 | 1.00               |
| Religion when twelve years old                              | (Ref: Islam)                              |                      |                    |
|                                                             | Collapsed affiliations with prevalence<3% | 1.34                 | 1.00               |
| Race plurality (prominent race/ethnic group [0] or not [1]) | (Ref: Plurality group)                    |                      |                    |
|                                                             | Non-plurality groups                      | 1.23                 | 1.00               |

**Table S6a. Germany: Demographic descriptive statistics**

| <b>Characteristic</b>                    | <b>N = 4,163<sup>1</sup></b> |
|------------------------------------------|------------------------------|
| <b>Age group</b>                         |                              |
| 1943 or earlier (current age: 80+ years) | 65 (1.6%)                    |
| 1943-1953 (current age: 70-79 years)     | 509 (12%)                    |
| 1953-1963 (current age: 60-69 years)     | 826 (20%)                    |
| 1963-1973 (current age: 50-59 years)     | 762 (18%)                    |
| 1973-1983 (current age: 40-49 years)     | 678 (16%)                    |
| 1983-1993 (current age: 30-39 years)     | 582 (14%)                    |
| 1993-1998 (current age: 25-29 years)     | 339 (8.1%)                   |
| 1998-2005 (current age: 18-24 years)     | 402 (9.7%)                   |
| (Missing)                                | 0 (0%)                       |
| <b>Gender</b>                            |                              |
| 1. Male                                  | 2,020 (49%)                  |
| 2. Female                                | 2,134 (51%)                  |
| 3. Other                                 | 5 (0.1%)                     |
| (Missing)                                | 5 (0.1%)                     |
| <b>Marital status</b>                    |                              |
| 1. Single/Never been married             | 1,222 (29%)                  |
| 2. Married                               | 2,123 (51%)                  |
| 3. Separated                             | 68 (1.6%)                    |
| 4. Divorced                              | 354 (8.5%)                   |
| 5. Widowed                               | 154 (3.7%)                   |
| 6. Domestic partner                      | 225 (5.4%)                   |
| (Missing)                                | 16 (0.4%)                    |
| <b>Employment</b>                        |                              |
| 1. Employed for an employer              | 2,269 (54%)                  |
| 2. Self-employed                         | 272 (6.5%)                   |
| 3. Retired                               | 987 (24%)                    |
| 4. Student                               | 297 (7.1%)                   |
| 5. Homemaker                             | 125 (3.0%)                   |
| 6. Unemployed and looking for a job      | 117 (2.8%)                   |
| 7. None of these/Other                   | 90 (2.2%)                    |
| (Missing)                                | 6 (0.1%)                     |
| <b>Religious service attendance</b>      |                              |
| 1. More than once a week                 | 79 (1.9%)                    |
| 2. Once a week                           | 190 (4.6%)                   |
| 3. One to three times a month            | 228 (5.5%)                   |
| 4. A few times a year                    | 1,068 (26%)                  |
| 5. Never                                 | 2,588 (62%)                  |
| (Missing)                                | 9 (0.2%)                     |
| <b>Education</b>                         |                              |
| 1. Up to 8                               | 61 (1.5%)                    |
| 2. 9-15                                  | 2,790 (67%)                  |
| 3. 16+                                   | 1,309 (31%)                  |
| (Missing)                                | 3 (<0.1%)                    |
| <b>Immigration</b>                       |                              |
| 1. Born in this country                  | 3,864 (93%)                  |
| 2. Born in another country               | 272 (6.5%)                   |

| <b>Characteristic</b>                                       | <b>N = 4,163<sup>1</sup></b> |
|-------------------------------------------------------------|------------------------------|
| (Missing)                                                   | 27 (0.6%)                    |
| <b>Religious affiliation</b>                                |                              |
| 1. Christianity                                             | 2,338 (56%)                  |
| 10. Taoism                                                  | 0 (<0.1%)                    |
| 11. Confucianism                                            | 2 (<0.1%)                    |
| 12. Primal, Animist, or Folk religion                       | 14 (0.3%)                    |
| 13. Spiritism                                               | 0 (0%)                       |
| 14. Umbanda, Candomblé, and other African-derived religions | 0 (0%)                       |
| 15. Chinese folk/traditional religion                       | 0 (0%)                       |
| 2. Islam                                                    | 117 (2.8%)                   |
| 3. Hinduism                                                 | 9 (0.2%)                     |
| 4. Buddhism                                                 | 23 (0.5%)                    |
| 5. Judaism                                                  | 7 (0.2%)                     |
| 6. Sikhism                                                  | 4 (0.1%)                     |
| 7. Baha'i                                                   | 2 (<0.1%)                    |
| 8. Jainism                                                  | 0 (0%)                       |
| 9. Shinto                                                   | 3 (<0.1%)                    |
| 96. Some other religion                                     | 25 (0.6%)                    |
| 97. No religion/Atheist/Agnostic                            | 1,580 (38%)                  |
| (Missing)                                                   | 39 (0.9%)                    |

<sup>1</sup>n (%)

**Table S6a. Germany: Childhood descriptive statistics**

| <b>Characteristic</b>                      | <b>N = 4,163<sup>1</sup></b> |
|--------------------------------------------|------------------------------|
| <b>Age</b>                                 | 49 (17)                      |
| <b>Year of birth</b>                       |                              |
| 1943 or earlier (current age: 80+ years)   | 65 (1.6%)                    |
| 1943-1953 (current age: 70-79 years)       | 509 (12%)                    |
| 1953-1963 (current age: 60-69 years)       | 826 (20%)                    |
| 1963-1973 (current age: 50-59 years)       | 762 (18%)                    |
| 1973-1983 (current age: 40-49 years)       | 678 (16%)                    |
| 1983-1993 (current age: 30-39 years)       | 582 (14%)                    |
| 1993-1998 (current age: 25-29 years)       | 339 (8.1%)                   |
| 1998-2005 (current age: 18-24 years)       | 402 (9.7%)                   |
| (Missing)                                  | 0 (0%)                       |
| <b>Gender</b>                              |                              |
| 1. Male                                    | 2,020 (49%)                  |
| 2. Female                                  | 2,134 (51%)                  |
| 3. Other                                   | 5 (0.1%)                     |
| (Missing)                                  | 5 (0.1%)                     |
| <b>Parent marital status</b>               |                              |
| 1. Parents were married                    | 3,412 (82%)                  |
| 2. Parents were divorced                   | 362 (8.7%)                   |
| 3. Parents were never married              | 249 (6.0%)                   |
| 4. One or both of them had died            | 95 (2.3%)                    |
| 5. Unsure                                  | 38 (0.9%)                    |
| (Missing)                                  | 7 (0.2%)                     |
| <b>Age 12 religious service attendance</b> |                              |
| 1. At least once a week                    | 847 (20%)                    |
| 2. One to three times a month              | 849 (20%)                    |
| 3. Less than once a month                  | 1,268 (30%)                  |
| 4. Never                                   | 1,185 (28%)                  |
| (Missing)                                  | 14 (0.3%)                    |
| <b>Relationship with mother</b>            |                              |
| 1. Very good                               | 2,191 (53%)                  |
| 2. Somewhat good                           | 1,447 (35%)                  |
| 3. Somewhat bad                            | 291 (7.0%)                   |
| 4. Very bad                                | 83 (2.0%)                    |
| 97. (Does not apply)                       | 137 (3.3%)                   |
| (Missing)                                  | 14 (0.3%)                    |
| <b>Relationship with father</b>            |                              |
| 1. Very good                               | 1,916 (46%)                  |
| 2. Somewhat good                           | 1,389 (33%)                  |
| 3. Somewhat bad                            | 364 (8.7%)                   |
| 4. Very bad                                | 175 (4.2%)                   |
| 97. (Does not apply)                       | 301 (7.2%)                   |
| (Missing)                                  | 18 (0.4%)                    |
| <b>Outsider growing up</b>                 |                              |
| 1. Yes                                     | 483 (12%)                    |
| 2. No                                      | 3,607 (87%)                  |
| (Missing)                                  | 72 (1.7%)                    |

| Characteristic                                              | N = 4,163 <sup>1</sup> |
|-------------------------------------------------------------|------------------------|
| <b>Abuse</b>                                                |                        |
| 1. Yes                                                      | 479 (12%)              |
| 2. No                                                       | 3,666 (88%)            |
| (Missing)                                                   | 18 (0.4%)              |
| <b>Self-rated health growing up</b>                         |                        |
| 1. Excellent                                                | 1,123 (27%)            |
| 2. Very good                                                | 1,663 (40%)            |
| 3. Good                                                     | 1,060 (25%)            |
| 4. Fair                                                     | 262 (6.3%)             |
| 5. Poor                                                     | 42 (1.0%)              |
| (Missing)                                                   | 13 (0.3%)              |
| <b>Immigration status</b>                                   |                        |
| 1. Born in this country                                     | 3,864 (93%)            |
| 2. Born in another country                                  | 272 (6.5%)             |
| (Missing)                                                   | 27 (0.6%)              |
| <b>Subjective financial status of family growing up</b>     |                        |
| 1. Lived comfortably                                        | 1,333 (32%)            |
| 2. Got by                                                   | 2,000 (48%)            |
| 3. Found it difficult                                       | 664 (16%)              |
| 4. Found it very difficult                                  | 152 (3.6%)             |
| (Missing)                                                   | 15 (0.4%)              |
| <b>Religious affiliation</b>                                |                        |
| 1. Christianity                                             | 2,835 (68%)            |
| 10. Taoism                                                  | 0 (0%)                 |
| 11. Confucianism                                            | 6 (0.1%)               |
| 12. Primal, Animist, or Folk religion                       | 15 (0.4%)              |
| 13. Spiritism                                               | 0 (0%)                 |
| 14. Umbanda, Candomblé, and other African-derived religions | 0 (0%)                 |
| 15. Chinese folk/traditional religion                       | 0 (0%)                 |
| 2. Islam                                                    | 109 (2.6%)             |
| 3. Hinduism                                                 | 9 (0.2%)               |
| 4. Buddhism                                                 | 5 (0.1%)               |
| 5. Judaism                                                  | 3 (<0.1%)              |
| 6. Sikhism                                                  | 6 (0.1%)               |
| 7. Baha'i                                                   | 1 (<0.1%)              |
| 8. Jainism                                                  | 0 (0%)                 |
| 9. Shinto                                                   | 0 (0%)                 |
| 96. Some other religion                                     | 36 (0.9%)              |
| 97. No religion/Atheist/Agnostic                            | 1,110 (27%)            |
| (Missing)                                                   | 29 (0.7%)              |

<sup>1</sup>Mean (SD); n (%)

**Table S6c. Germany: Proportions by demographic category**

| Variable                     | Category                                 | Proportion | 95% CI         | SE    | p-value  |
|------------------------------|------------------------------------------|------------|----------------|-------|----------|
| Age group                    | 1998-2005 (current age: 18-24 years)     | 0.883      | (0.837, 0.929) | 0.023 | 5.54e-02 |
|                              | 1943 or earlier (current age: 80+ years) | 0.811      | (0.669, 0.953) | 0.071 |          |
|                              | 1943-1953 (current age: 70-79 years)     | 0.841      | (0.804, 0.878) | 0.019 |          |
|                              | 1953-1963 (current age: 60-69 years)     | 0.835      | (0.807, 0.864) | 0.015 |          |
|                              | 1963-1973 (current age: 50-59 years)     | 0.803      | (0.769, 0.838) | 0.018 |          |
|                              | 1973-1983 (current age: 40-49 years)     | 0.824      | (0.785, 0.862) | 0.020 |          |
|                              | 1983-1993 (current age: 30-39 years)     | 0.830      | (0.792, 0.869) | 0.020 |          |
|                              | 1993-1998 (current age: 25-29 years)     | 0.890      | (0.846, 0.935) | 0.023 |          |
|                              | Male                                     | 0.822      | (0.802, 0.843) | 0.010 |          |
|                              | Female                                   | 0.850      | (0.830, 0.869) | 0.010 |          |
| Gender                       | Other                                    | 0.701      | *              | *     | 1.40e-01 |
| Marital status               | Single/Never been married                | 0.848      | (0.821, 0.874) | 0.013 | 8.70e-03 |
|                              | Divorced                                 | 0.820      | (0.779, 0.861) | 0.021 |          |
|                              | Domestic partner                         | 0.917      | (0.872, 0.962) | 0.023 |          |
|                              | Married                                  | 0.827      | (0.806, 0.848) | 0.011 |          |
|                              | Separated                                | 0.820      | (0.703, 0.937) | 0.059 |          |
|                              | Widowed                                  | 0.804      | (0.729, 0.878) | 0.038 |          |
|                              | Employed for an employer                 | 0.834      | (0.814, 0.854) | 0.010 | 1.20e-02 |
| Employment                   | Homemaker                                | 0.840      | (0.771, 0.909) | 0.035 |          |
|                              | None of these/Other                      | 0.803      | (0.711, 0.896) | 0.046 |          |
|                              | Retired                                  | 0.821      | (0.793, 0.848) | 0.014 |          |
|                              | Self-employed                            | 0.886      | (0.832, 0.940) | 0.027 |          |
|                              | Student                                  | 0.902      | (0.851, 0.953) | 0.026 |          |
|                              | Unemployed and looking for a job         | 0.750      | (0.672, 0.829) | 0.040 |          |
| Religious service attendance | Never                                    | 0.812      | (0.793, 0.830) | 0.009 | 3.43e-09 |
|                              | A few times a year                       | 0.883      | (0.859, 0.907) | 0.012 |          |
|                              | More than once a week                    | 0.959      | (0.912, 1.000) | 0.023 |          |
|                              | Once a week                              | 0.850      | (0.774, 0.925) | 0.038 |          |
|                              | One to three times                       | 0.843      | (0.776, 0.910) | 0.034 |          |

| Variable              | Category                                                | Proportion | 95% CI         | SE    | p-value  |
|-----------------------|---------------------------------------------------------|------------|----------------|-------|----------|
| Education             | a month                                                 |            |                |       |          |
|                       | 9-15                                                    | 0.814      | (0.795, 0.832) | 0.009 | 4.54e-08 |
|                       | 16+                                                     | 0.891      | (0.869, 0.912) | 0.011 |          |
| Immigration status    | Up to 8                                                 | 0.709      | (0.584, 0.833) | 0.062 |          |
|                       | Born in this country                                    | 0.836      | (0.821, 0.850) | 0.007 | 7.82e-01 |
|                       | Born in another country                                 | 0.844      | (0.786, 0.902) | 0.029 |          |
| Religious affiliation | No religion/Atheist/Agnostic                            | 0.839      | (0.817, 0.862) | 0.012 | 9.32e-01 |
|                       | Christianity                                            | 0.834      | (0.816, 0.852) | 0.009 |          |
|                       | Combined                                                | 0.838      | (0.761, 0.916) | 0.039 |          |
|                       | Spiritism                                               | *          | *              | *     |          |
|                       | Umbanda, Candomblé, and other African-derived religions | *          | *              | *     |          |
|                       | Buddhism                                                | *          | *              | *     |          |
|                       | Islam                                                   | *          | *              | *     |          |
|                       | Chinese folk/traditional religion                       | *          | *              | *     |          |
|                       | Hinduism                                                | *          | *              | *     |          |
|                       | Judaism                                                 | *          | *              | *     |          |
|                       | Primal, Animist, or Folk religion                       | *          | *              | *     |          |

**Table S6d. Germany: Childhood predictors regression analysis**

| Variable                                                        | Category                                                                                                                | Risk-Ratio                       | logRR SE                         | RR 95% CI                                                | Global p-value |
|-----------------------------------------------------------------|-------------------------------------------------------------------------------------------------------------------------|----------------------------------|----------------------------------|----------------------------------------------------------|----------------|
| Relationship with your mother growing up                        | (Ref: Very bad/somewhat bad)<br>Very good/somewhat good                                                                 | 0.997                            | 0.025                            | (0.95,1.05)                                              | 0.594          |
| Relationship with your father growing up                        | (Ref: Very bad/somewhat bad)<br>Very good/somewhat good                                                                 | 1.021                            | 0.023                            | (0.98,1.07)                                              | 0.399          |
| Parents married to each other when you were around 12 years old | (Ref: Parents married)<br>One or both of them had died<br>Parents were divorced<br>Parents were never married<br>Unsure | 1.104<br>0.997<br>1.003<br>1.016 | 0.035<br>0.029<br>0.031<br>0.079 | (1.03,1.18)<br>(0.94,1.06)<br>(0.94,1.07)<br>(0.87,1.19) | 0.021          |
| Feelings about familys household income when growing up         | (Ref: Got by)<br>Found it difficult<br>Found it very difficult<br>Lived comfortably                                     | 0.993<br>0.988<br>1.044          | 0.022<br>0.042<br>0.017          | (0.95,1.04)<br>(0.91,1.07)<br>(1.01,1.08)                | 0.031          |
| Physically or sexually abused when growing up                   | (Ref: No)                                                                                                               | 1.017                            | 0.024                            | (0.97,1.07)                                              | 0.466          |
| Felt like an outsider in your family when growing up            | (Ref: No)<br>Yes                                                                                                        | 0.988                            | 0.023                            | (0.95,1.03)                                              | 0.519          |
| Your health when growing up                                     | (Ref: Good)<br>Excellent<br>Fair                                                                                        | 1.058<br>1.023                   | 0.021<br>0.030                   | (1.02,1.10)<br>(0.96,1.08)                               | 0.016          |

| Variable                                                                                  | Category                                  | Risk-Ratio | logRR SE | RR 95% CI   | Global p-value |
|-------------------------------------------------------------------------------------------|-------------------------------------------|------------|----------|-------------|----------------|
| Born in This country                                                                      | Poor                                      | 0.973      | 0.073    | (0.84,1.12) | 0.505          |
|                                                                                           | Very good                                 | 1.054      | 0.020    | (1.01,1.10) |                |
|                                                                                           | (Ref: Born in this country)               |            |          |             |                |
| How Often You Attended Religious Services or Worshipped When You Were Around 12 Years Old | Born in another country                   | 1.017      | 0.031    | (0.96,1.08) | 2.04e-04       |
|                                                                                           | (Ref: Never)                              |            |          |             |                |
|                                                                                           | At least once a week                      | 1.092      | 0.022    | (1.05,1.14) |                |
| Year of birth (age group)                                                                 | Less than once a month                    | 1.070      | 0.021    | (1.03,1.11) | 0.233          |
|                                                                                           | One to three times a month                | 1.049      | 0.025    | (1.00,1.10) |                |
|                                                                                           | (Ref: 1998-2005; current age: 18-24)      |            |          |             |                |
|                                                                                           | 1943 or earlier (current age: 80+ years)  | 0.935      | 0.076    | (0.81,1.08) |                |
|                                                                                           | 1943-1953 (current age: 70-79 years)      | 0.969      | 0.032    | (0.91,1.03) |                |
|                                                                                           | 1953-1963 (current age: 60-69 years)      | 0.967      | 0.029    | (0.91,1.02) |                |
|                                                                                           | 1963-1973 (current age: 50-59 years)      | 0.939      | 0.031    | (0.88,1.00) |                |
|                                                                                           | 1973-1983 (current age: 40-49 years)      | 0.954      | 0.031    | (0.90,1.01) |                |
|                                                                                           | 1983-1993 (current age: 30-39 years)      | 0.956      | 0.031    | (0.90,1.01) |                |
|                                                                                           | 1993-1998 (current age: 25-29 years)      | 1.009      | 0.033    | (0.95,1.08) |                |
|                                                                                           | (Ref: No religion/Atheist/Agnostic)       |            |          |             |                |
|                                                                                           | Christianity                              | 0.974      | 0.020    | (0.94,1.01) |                |
|                                                                                           | Collapsed affiliations with prevalence<3% | 0.949      | 0.048    | (0.86,1.04) |                |
|                                                                                           |                                           |            |          |             |                |
|                                                                                           |                                           |            |          |             |                |
| Religion when twelve years old                                                            |                                           |            |          |             | 0.318          |

**Table S6e. Germany: Sensitivity to unmeasured confounding of childhood predictors**

| Variable                                                                                 | Category                                 | E-value for Estimate | E-value for 95% CI |
|------------------------------------------------------------------------------------------|------------------------------------------|----------------------|--------------------|
| Relationship with your mother growing up                                                 | (Ref: Very bad/somewhat bad)             |                      |                    |
|                                                                                          | Very good/somewhat good                  | 1.06                 | 1.00               |
| Relationship with your father growing up                                                 | (Ref: Very bad/somewhat bad)             |                      |                    |
|                                                                                          | Very good/somewhat good                  | 1.17                 | 1.00               |
| Parents married to each other when you were around 12 years old                          | (Ref: Parents married)                   |                      |                    |
|                                                                                          | One or both of them had died             | 1.44                 | 1.21               |
|                                                                                          | Parents were divorced                    | 1.05                 | 1.00               |
|                                                                                          | Parents were never married               | 1.06                 | 1.00               |
|                                                                                          | Unsure                                   | 1.14                 | 1.00               |
| Feelings about familys household income when growing up                                  | (Ref: Got by)                            |                      |                    |
|                                                                                          | Found it difficult                       | 1.09                 | 1.00               |
|                                                                                          | Found it very difficult                  | 1.12                 | 1.00               |
|                                                                                          | Lived comfortably                        | 1.26                 | 1.11               |
| Physically or sexually abused when growing up                                            | (Ref: No)                                |                      |                    |
|                                                                                          |                                          | 1.15                 | 1.00               |
| Felt like an outsider in your family when growing up                                     | (Ref: No)                                |                      |                    |
|                                                                                          | Yes                                      | 1.12                 | 1.00               |
| Your health when growing up                                                              | (Ref: Good)                              |                      |                    |
|                                                                                          | Excellent                                | 1.31                 | 1.14               |
|                                                                                          | Fair                                     | 1.18                 | 1.00               |
|                                                                                          | Poor                                     | 1.20                 | 1.00               |
|                                                                                          | Very good                                | 1.29                 | 1.13               |
| Born in This country                                                                     | (Ref: Born in this country)              |                      |                    |
|                                                                                          | Born in another country                  | 1.15                 | 1.00               |
| How Often You Attended Religious Services or Worshiped When You Were Around 12 Years Old | (Ref: Never)                             |                      |                    |
|                                                                                          | At least once a week                     | 1.41                 | 1.26               |
|                                                                                          | Less than once a month                   | 1.34                 | 1.20               |
|                                                                                          | One to three times a month               | 1.28                 | 1.00               |
| Year of birth (age group)                                                                | (Ref: 1998-2005; current age: 18-24)     |                      |                    |
|                                                                                          | 1943 or earlier (current age: 80+ years) | 1.34                 | 1.00               |
|                                                                                          | 1943-1953 (current age: 70-79 years)     | 1.21                 | 1.00               |

| Variable                       | Category                                  | E-value for Estimate | E-value for 95% CI |
|--------------------------------|-------------------------------------------|----------------------|--------------------|
|                                | 1953-1963 (current age: 60-69 years)      | 1.22                 | 1.00               |
|                                | 1963-1973 (current age: 50-59 years)      | 1.33                 | 1.06               |
|                                | 1973-1983 (current age: 40-49 years)      | 1.27                 | 1.00               |
|                                | 1983-1993 (current age: 30-39 years)      | 1.27                 | 1.00               |
|                                | 1993-1998 (current age: 25-29 years)      | 1.10                 | 1.00               |
| Religion when twelve years old | (Ref: No religion/Atheist/Agnostic)       |                      |                    |
|                                | Christianity                              | 1.19                 | 1.00               |
|                                | Collapsed affiliations with prevalence<3% | 1.29                 | 1.00               |

**Table S7a. Hong Kong: Demographic descriptive statistics**

| Characteristic                           | N = 706 <sup>1</sup> |
|------------------------------------------|----------------------|
| <b>Age group</b>                         |                      |
| 1943 or earlier (current age: 80+ years) | 0 (0%)               |
| 1943-1953 (current age: 70-79 years)     | 48 (6.8%)            |
| 1953-1963 (current age: 60-69 years)     | 135 (19%)            |
| 1963-1973 (current age: 50-59 years)     | 141 (20%)            |
| 1973-1983 (current age: 40-49 years)     | 156 (22%)            |
| 1983-1993 (current age: 30-39 years)     | 150 (21%)            |
| 1993-1998 (current age: 25-29 years)     | 33 (4.6%)            |
| 1998-2005 (current age: 18-24 years)     | 44 (6.2%)            |
| (Missing)                                | 0 (0%)               |
| <b>Gender</b>                            |                      |
| 1. Male                                  | 311 (44%)            |
| 2. Female                                | 395 (56%)            |
| 3. Other                                 | 0 (0%)               |
| (Missing)                                | 0 (0%)               |
| <b>Marital status</b>                    |                      |
| 1. Single/Never been married             | 234 (33%)            |
| 2. Married                               | 424 (60%)            |
| 3. Separated                             | 3 (0.4%)             |
| 4. Divorced                              | 21 (3.0%)            |
| 5. Widowed                               | 16 (2.3%)            |
| 6. Domestic partner                      | 8 (1.2%)             |
| (Missing)                                | 0 (0%)               |
| <b>Employment</b>                        |                      |
| 1. Employed for an employer              | 499 (71%)            |
| 2. Self-employed                         | 24 (3.4%)            |
| 3. Retired                               | 95 (13%)             |
| 4. Student                               | 10 (1.4%)            |
| 5. Homemaker                             | 42 (5.9%)            |
| 6. Unemployed and looking for a job      | 23 (3.3%)            |
| 7. None of these/Other                   | 10 (1.5%)            |
| (Missing)                                | 3 (0.4%)             |
| <b>Religious service attendance</b>      |                      |
| 1. More than once a week                 | 12 (1.8%)            |
| 2. Once a week                           | 56 (8.0%)            |
| 3. One to three times a month            | 60 (8.5%)            |
| 4. A few times a year                    | 147 (21%)            |
| 5. Never                                 | 430 (61%)            |
| (Missing)                                | 0 (0%)               |
| <b>Education</b>                         |                      |
| 1. Up to 8                               | 49 (6.9%)            |
| 2. 9-15                                  | 505 (72%)            |
| 3. 16+                                   | 152 (22%)            |
| (Missing)                                | 0 (0%)               |

| Characteristic                                                    | N = 706 <sup>1</sup> |
|-------------------------------------------------------------------|----------------------|
| <b>Immigration</b>                                                |                      |
| 1. Born in this country                                           | 624 (88%)            |
| 2. Born in another country                                        | 62 (8.8%)            |
| (Missing)                                                         | 20 (2.8%)            |
| <b>Religious affiliation</b>                                      |                      |
| 1. Christianity                                                   | 144 (20%)            |
| 10. Taoism                                                        | 25 (3.5%)            |
| 11. Confucianism                                                  | 1 (<0.1%)            |
| 12. Primal, Animist, or Folk religion                             | 5 (0.7%)             |
| 13. Spiritism                                                     | 0 (0%)               |
| 14. Umbanda, Candomblé, and other African-derived religions       | 0 (0%)               |
| 15. Chinese folk/traditional religion                             | 30 (4.2%)            |
| 2. Islam                                                          | 3 (0.5%)             |
| 3. Hinduism                                                       | 1 (0.2%)             |
| 4. Buddhism                                                       | 54 (7.7%)            |
| 5. Judaism                                                        | 0 (0%)               |
| 6. Sikhism                                                        | 0 (0%)               |
| 7. Baha'i                                                         | 0 (0%)               |
| 8. Jainism                                                        | 0 (0%)               |
| 9. Shinto                                                         | 1 (<0.1%)            |
| 96. Some other religion                                           | 0 (0%)               |
| 97. No religion/Atheist/Agnostic                                  | 440 (62%)            |
| (Missing)                                                         | 2 (0.3%)             |
| <b>RACE ETHNICITY</b>                                             |                      |
| 2401. Hong Kong: Chinese (Cantonese)                              | 494 (70%)            |
| 2402. Hong Kong: Chinese (Chaoshan)                               | 47 (6.7%)            |
| 2403. Hong Kong: Chinese (Fujianese)                              | 15 (2.2%)            |
| 2404. Hong Kong: Chinese (Hakka)                                  | 22 (3.0%)            |
| 2405. Hong Kong: Chinese (Shanghainese)                           | 24 (3.4%)            |
| 2406. Hong Kong: Chinese (Other ethnicity)                        | 56 (8.0%)            |
| 2407. Hong Kong: East Asian (Korean, Japanese)                    | 1 (0.1%)             |
| 2408. Hong Kong: Southeast Asian (Filipino, Indonesian, Thailand) | 1 (<0.1%)            |
| 2409. Hong Kong: South Asian (Indian, Nepalese, Pakistani)        | 3 (0.4%)             |
| 2410. Hong Kong: Taiwanese                                        | 1 (0.1%)             |
| 2411. Hong Kong: White                                            | 2 (0.4%)             |
| 9995. Prefer not to answer                                        | 36 (5.1%)            |
| 9996. Other                                                       | 3 (0.4%)             |

<sup>1</sup>n (%)

**Table S7b. Hong Kong: Childhood descriptive statistics**

| <b>Characteristic</b>                      | <b>N = 706<sup>1</sup></b> |
|--------------------------------------------|----------------------------|
| <b>Age</b>                                 | 48 (15)                    |
| <b>Year of birth</b>                       |                            |
| 1943 or earlier (current age: 80+ years)   | 0 (0%)                     |
| 1943-1953 (current age: 70-79 years)       | 48 (6.8%)                  |
| 1953-1963 (current age: 60-69 years)       | 135 (19%)                  |
| 1963-1973 (current age: 50-59 years)       | 141 (20%)                  |
| 1973-1983 (current age: 40-49 years)       | 156 (22%)                  |
| 1983-1993 (current age: 30-39 years)       | 150 (21%)                  |
| 1993-1998 (current age: 25-29 years)       | 33 (4.6%)                  |
| 1998-2005 (current age: 18-24 years)       | 44 (6.2%)                  |
| (Missing)                                  | 0 (0%)                     |
| <b>Gender</b>                              |                            |
| 1. Male                                    | 311 (44%)                  |
| 2. Female                                  | 395 (56%)                  |
| 3. Other                                   | 0 (0%)                     |
| (Missing)                                  | 0 (0%)                     |
| <b>Parent marital status</b>               |                            |
| 1. Parents were married                    | 644 (91%)                  |
| 2. Parents were divorced                   | 20 (2.9%)                  |
| 3. Parents were never married              | 13 (1.9%)                  |
| 4. One or both of them had died            | 18 (2.6%)                  |
| 5. Unsure                                  | 10 (1.4%)                  |
| (Missing)                                  | 0 (0%)                     |
| <b>Age 12 religious service attendance</b> |                            |
| 1. At least once a week                    | 58 (8.2%)                  |
| 2. One to three times a month              | 51 (7.2%)                  |
| 3. Less than once a month                  | 206 (29%)                  |
| 4. Never                                   | 392 (55%)                  |
| (Missing)                                  | 0 (0%)                     |
| <b>Relationship with mother</b>            |                            |
| 1. Very good                               | 208 (29%)                  |
| 2. Somewhat good                           | 282 (40%)                  |
| 3. Somewhat bad                            | 101 (14%)                  |
| 4. Very bad                                | 23 (3.3%)                  |
| 97. (Does not apply)                       | 91 (13%)                   |
| (Missing)                                  | 0 (<0.1%)                  |
| <b>Relationship with father</b>            |                            |
| 1. Very good                               | 155 (22%)                  |
| 2. Somewhat good                           | 271 (38%)                  |
| 3. Somewhat bad                            | 110 (16%)                  |
| 4. Very bad                                | 43 (6.0%)                  |
| 97. (Does not apply)                       | 127 (18%)                  |
| (Missing)                                  | 0 (0%)                     |
| <b>Outsider growing up</b>                 |                            |
| 1. Yes                                     | 102 (14%)                  |
| 2. No                                      | 590 (84%)                  |
| (Missing)                                  | 14 (2.0%)                  |

| Characteristic                                              | N = 706 <sup>1</sup> |
|-------------------------------------------------------------|----------------------|
| <b>Abuse</b>                                                |                      |
| 1. Yes                                                      | 58 (8.3%)            |
| 2. No                                                       | 648 (92%)            |
| (Missing)                                                   | 0 (0%)               |
| <b>Self-rated health growing up</b>                         |                      |
| 1. Excellent                                                | 49 (6.9%)            |
| 2. Very good                                                | 212 (30%)            |
| 3. Good                                                     | 263 (37%)            |
| 4. Fair                                                     | 150 (21%)            |
| 5. Poor                                                     | 30 (4.3%)            |
| (Missing)                                                   | 1 (0.2%)             |
| <b>Immigration status</b>                                   |                      |
| 1. Born in this country                                     | 624 (88%)            |
| 2. Born in another country                                  | 62 (8.8%)            |
| (Missing)                                                   | 20 (2.8%)            |
| <b>Subjective financial status of family growing up</b>     |                      |
| 1. Lived comfortably                                        | 91 (13%)             |
| 2. Got by                                                   | 400 (57%)            |
| 3. Found it difficult                                       | 180 (25%)            |
| 4. Found it very difficult                                  | 32 (4.5%)            |
| (Missing)                                                   | 3 (0.4%)             |
| <b>Religious affiliation</b>                                |                      |
| 1. Christianity                                             | 125 (18%)            |
| 10. Taoism                                                  | 20 (2.8%)            |
| 11. Confucianism                                            | 0 (0%)               |
| 12. Primal, Animist, or Folk religion                       | 3 (0.4%)             |
| 13. Spiritism                                               | 0 (0%)               |
| 14. Umbanda, Candomblé, and other African-derived religions | 0 (0%)               |
| 15. Chinese folk/traditional religion                       | 26 (3.7%)            |
| 2. Islam                                                    | 3 (0.5%)             |
| 3. Hinduism                                                 | 1 (0.2%)             |
| 4. Buddhism                                                 | 51 (7.2%)            |
| 5. Judaism                                                  | 1 (<0.1%)            |
| 6. Sikhism                                                  | 0 (0%)               |
| 7. Baha'i                                                   | 0 (0%)               |
| 8. Jainism                                                  | 0 (<0.1%)            |
| 9. Shinto                                                   | 0 (0%)               |
| 96. Some other religion                                     | 4 (0.6%)             |
| 97. No religion/Atheist/Agnostic                            | 471 (67%)            |
| (Missing)                                                   | 0 (0%)               |
| <b>Race/Ethnicity</b>                                       |                      |
| 2401. Hong Kong: Chinese (Cantonese)                        | 494 (70%)            |
| 2402. Hong Kong: Chinese (Chaoshan)                         | 47 (6.7%)            |
| 2403. Hong Kong: Chinese (Fujianese)                        | 15 (2.2%)            |
| 2404. Hong Kong: Chinese (Hakka)                            | 22 (3.0%)            |
| 2405. Hong Kong: Chinese (Shanghainese)                     | 24 (3.4%)            |
| 2406. Hong Kong: Chinese (Other ethnicity)                  | 56 (8.0%)            |

| <b>Characteristic</b>                                             | <b>N = 706<sup>1</sup></b> |
|-------------------------------------------------------------------|----------------------------|
| 2407. Hong Kong: East Asian (Korean, Japanese)                    | 1 (0.1%)                   |
| 2408. Hong Kong: Southeast Asian (Filipino, Indonesian, Thailand) | 1 (<0.1%)                  |
| 2409. Hong Kong: South Asian (Indian, Nepalese, Pakistani)        | 3 (0.4%)                   |
| 2410. Hong Kong: Taiwanese                                        | 1 (0.1%)                   |
| 2411. Hong Kong: White                                            | 2 (0.4%)                   |
| 9995. Prefer not to answer                                        | 36 (5.1%)                  |
| 9996. Other                                                       | 3 (0.4%)                   |

<sup>1</sup>Mean (SD); n (%)

**Table S7c. Hong Kong: Proportions by demographic category**

| Variable                         | Category                                 | Proportion                | 95% CI         | SE             | p-value  |          |          |
|----------------------------------|------------------------------------------|---------------------------|----------------|----------------|----------|----------|----------|
| Age group                        | 1998-2005 (current age: 18-24 years)     | 0.634                     | (0.374, 0.895) | 0.128          | 7.68e-01 |          |          |
|                                  | 1943 or earlier (current age: 80+ years) | *                         | *              | *              |          |          |          |
|                                  | 1943-1953 (current age: 70-79 years)     | 0.561                     | (0.277, 0.845) | 0.140          |          |          |          |
|                                  | 1953-1963 (current age: 60-69 years)     | 0.428                     | (0.276, 0.580) | 0.077          |          |          |          |
|                                  | 1963-1973 (current age: 50-59 years)     | 0.475                     | (0.378, 0.573) | 0.049          |          |          |          |
|                                  | 1973-1983 (current age: 40-49 years)     | 0.473                     | (0.396, 0.550) | 0.039          |          |          |          |
|                                  | 1983-1993 (current age: 30-39 years)     | 0.425                     | (0.325, 0.525) | 0.051          |          |          |          |
|                                  | 1993-1998 (current age: 25-29 years)     | 0.428                     | (0.196, 0.660) | 0.112          |          |          |          |
|                                  | Gender                                   | Male                      | 0.492          | (0.410, 0.574) |          | 0.042    | 4.21e-01 |
|                                  |                                          | Female                    | 0.450          | (0.383, 0.516) |          | 0.034    |          |
| Other                            |                                          | *                         | *              | *              |          |          |          |
| Marital status                   |                                          | Single/Never been married | 0.451          | (0.360, 0.543) | 0.046    | < 1e-16  |          |
|                                  | Divorced                                 | 0.284                     | (0.041, 0.527) | 0.112          |          |          |          |
|                                  | Domestic partner                         | 0.514                     | (0.000, 1.000) | 0.138          |          |          |          |
|                                  | Married                                  | 0.487                     | (0.420, 0.553) | 0.034          |          |          |          |
|                                  | Separated                                | 1.000                     | *              | *              |          |          |          |
|                                  | Widowed                                  | 0.364                     | (0.000, 0.809) | 0.192          |          |          |          |
|                                  | Employment                               | Employed for an employer  | 0.472          | (0.417, 0.527) | 0.028    |          | 9.54e-03 |
| Homemaker                        |                                          | 0.413                     | (0.141, 0.684) | 0.132          |          |          |          |
| None of these/Other              |                                          | 0.224                     | (0.000, 0.935) | 0.144          |          |          |          |
| Retired                          |                                          | 0.484                     | (0.293, 0.675) | 0.096          |          |          |          |
| Self-employed                    |                                          | 0.409                     | (0.121, 0.697) | 0.135          |          |          |          |
| Student                          |                                          | 0.861                     | (0.000, 1.000) | 0.106          |          |          |          |
| Unemployed and looking for a job |                                          | 0.444                     | (0.102, 0.786) | 0.159          |          |          |          |
| Religious service attendance     |                                          | Never                     | 0.426          | (0.360, 0.492) | 0.034    | 5.70e-09 |          |
|                                  | A few times a year                       | 0.459                     | (0.344, 0.574) | 0.058          |          |          |          |
|                                  | More than once a week                    | 0.931                     | (0.756, 1.000) | 0.069          |          |          |          |
|                                  | Once a week                              | 0.586                     | (0.429, 0.743) | 0.078          |          |          |          |
|                                  | One to three times                       | 0.590                     | (0.386, 0.794) | 0.101          |          |          |          |

| Variable              | Category            | Proportion     | 95% CI         | SE    | p-value  |
|-----------------------|---------------------|----------------|----------------|-------|----------|
| Education             | a month             |                |                |       |          |
|                       | 9-15                | 0.464          | (0.402, 0.525) | 0.031 | 6.79e-01 |
|                       | 16+                 | 0.502          | (0.415, 0.589) | 0.044 |          |
| Up to 8               | 0.414               | (0.107, 0.722) | 0.152          |       |          |
| Immigration status    | Born in this        |                |                |       |          |
|                       | country             | 0.450          | (0.397, 0.504) | 0.027 | 1.28e-02 |
|                       | Born in another     |                |                |       |          |
| country               | 0.649               | (0.469, 0.829) | 0.089          |       |          |
| Religious affiliation | No                  |                |                |       |          |
|                       | religion/Atheist/Ag |                |                |       |          |
|                       | nostic              | 0.425          | (0.362, 0.488) | 0.032 | 1.36e-01 |
|                       | Christianity        | 0.542          | (0.435, 0.650) | 0.055 |          |
|                       | Combined            | 0.585          | (0.336, 0.834) | 0.121 |          |
|                       | Spiritism           | *              | *              | *     |          |
|                       | Umbanda,            |                |                |       |          |
|                       | Candomblé, and      |                |                |       |          |
|                       | other African-      |                |                |       |          |
|                       | derived religions   | *              | *              | *     |          |
|                       | Buddhism            | 0.440          | (0.228, 0.651) | 0.105 |          |
|                       | Islam               | *              | *              | *     |          |
|                       | Chinese             |                |                |       |          |
|                       | folk/traditional    |                |                |       |          |
|                       | religion            | 0.669          | (0.329, 1.000) | 0.161 |          |
| Hinduism              | *                   | *              | *              |       |          |
| Judaism               | *                   | *              | *              |       |          |
| Primal, Animist, or   |                     |                |                |       |          |
|                       | Folk religion       | *              | *              | *     |          |

**Table S7d. Hong Kong: Childhood predictors regression analysis**

| Variable                                                        | Category                     | Risk-Ratio | logRR SE | RR 95% CI   | Global p-value |
|-----------------------------------------------------------------|------------------------------|------------|----------|-------------|----------------|
| Relationship with your mother growing up                        | (Ref: Very bad/somewhat bad) |            |          |             | 0.610          |
|                                                                 | Very good/somewhat good      | 1.002      | 0.071    | (0.87,1.15) |                |
| Relationship with your father growing up                        | (Ref: Very bad/somewhat bad) |            |          |             | 0.423          |
|                                                                 | Very good/somewhat good      | 1.054      | 0.064    | (0.93,1.19) |                |
| Parents married to each other when you were around 12 years old | (Ref: Parents married)       |            |          |             | 0.715          |
|                                                                 | One or both of them had died | 0.867      | 0.165    | (0.63,1.20) |                |
|                                                                 | Parents were divorced        | 1.005      | 0.148    | (0.75,1.34) |                |
|                                                                 | Parents were never married   | 1.117      | 0.137    | (0.85,1.46) |                |
|                                                                 | Unsure                       | 1.041      | 0.196    | (0.71,1.53) |                |
| Feelings about familys household income when growing up         | (Ref: Got by)                |            |          |             | 0.674          |
|                                                                 | Found it difficult           | 1.002      | 0.063    | (0.89,1.13) |                |
|                                                                 | Found it very difficult      | 1.139      | 0.138    | (0.87,1.49) |                |
|                                                                 | Lived comfortably            | 1.024      | 0.075    | (0.88,1.19) |                |
| Physically or sexually abused when growing up                   | (Ref: No)                    |            |          |             | 0.475          |
|                                                                 |                              | 1.064      | 0.093    | (0.89,1.28) |                |
| Felt like an outsider in your family when growing up            | (Ref: No)                    |            |          |             | 0.401          |
|                                                                 | Yes                          | 0.941      | 0.069    | (0.82,1.08) |                |
| Your health when growing up                                     | (Ref: Good)                  |            |          |             | 0.286          |
|                                                                 | Excellent                    | 1.132      | 0.105    | (0.92,1.39) |                |
|                                                                 | Fair                         | 0.933      | 0.072    | (0.81,1.07) |                |
|                                                                 | Poor                         | 0.955      | 0.141    | (0.72,1.26) |                |
| Born in This                                                    | Very good                    | 1.118      | 0.062    | (0.99,1.26) | 0.017          |
|                                                                 | (Ref: Born in this           |            |          |             |                |

| Variable                                                                                  | Category                                  | Risk-Ratio | logRR SE | RR 95% CI   | Global p-value |
|-------------------------------------------------------------------------------------------|-------------------------------------------|------------|----------|-------------|----------------|
| country                                                                                   | country)                                  |            |          |             |                |
|                                                                                           | Born in another country                   | 1.248      | 0.091    | (1.04,1.49) |                |
| How Often You Attended Religious Services or Worshipped When You Were Around 12 Years Old | (Ref: Never)                              |            |          |             | 0.621          |
|                                                                                           | At least once a week                      | 1.106      | 0.111    | (0.89,1.37) |                |
|                                                                                           | Less than once a month                    | 1.013      | 0.060    | (0.90,1.14) |                |
|                                                                                           | One to three times a month                | 1.076      | 0.097    | (0.89,1.30) |                |
| Year of birth (age group)                                                                 | (Ref: 1998-2005; current age: 18-24)      |            |          |             | 0.225          |
|                                                                                           | 1943-1953 (current age: 70-79 years)      | 0.874      | 0.176    | (0.62,1.23) |                |
|                                                                                           | 1953-1963 (current age: 60-69 years)      | 0.801      | 0.138    | (0.61,1.05) |                |
|                                                                                           | 1963-1973 (current age: 50-59 years)      | 0.847      | 0.122    | (0.67,1.08) |                |
|                                                                                           | 1973-1983 (current age: 40-49 years)      | 0.846      | 0.118    | (0.67,1.07) |                |
|                                                                                           | 1983-1993 (current age: 30-39 years)      | 0.801      | 0.121    | (0.63,1.02) |                |
|                                                                                           | 1993-1998 (current age: 25-29 years)      | 0.833      | 0.147    | (0.62,1.11) |                |
| Religion when twelve years old                                                            | (Ref: No religion/Atheist/Agnostic)       |            |          |             | 0.766          |
|                                                                                           | Buddhism                                  | 1.055      | 0.127    | (0.82,1.35) |                |
|                                                                                           | Chinese folk/traditional religion         | 1.052      | 0.133    | (0.81,1.37) |                |
|                                                                                           | Christianity                              | 1.002      | 0.078    | (0.86,1.17) |                |
|                                                                                           | Collapsed affiliations with prevalence<3% | 1.111      | 0.145    | (0.84,1.48) |                |

**Table S7e. Hong Kong: Sensitivity to unmeasured confounding of childhood predictors**

| Variable                                                                                 | Category                             | E-value for Estimate | E-value for 95% CI |
|------------------------------------------------------------------------------------------|--------------------------------------|----------------------|--------------------|
| Relationship with your mother growing up                                                 | (Ref: Very bad/somewhat bad)         |                      |                    |
|                                                                                          | Very good/somewhat good              | 1.05                 | 1.00               |
| Relationship with your father growing up                                                 | (Ref: Very bad/somewhat bad)         |                      |                    |
|                                                                                          | Very good/somewhat good              | 1.29                 | 1.00               |
| Parents married to each other when you were around 12 years old                          | (Ref: Parents married)               |                      |                    |
|                                                                                          | One or both of them had died         | 1.57                 | 1.00               |
|                                                                                          | Parents were divorced                | 1.08                 | 1.00               |
|                                                                                          | Parents were never married           | 1.48                 | 1.00               |
|                                                                                          | Unsure                               | 1.25                 | 1.00               |
| Feelings about family household income when growing up                                   | (Ref: Got by)                        |                      |                    |
|                                                                                          | Found it difficult                   | 1.04                 | 1.00               |
|                                                                                          | Found it very difficult              | 1.54                 | 1.00               |
|                                                                                          | Lived comfortably                    | 1.18                 | 1.00               |
| Physically or sexually abused when growing up                                            | (Ref: No)                            |                      |                    |
|                                                                                          |                                      | 1.32                 | 1.00               |
| Felt like an outsider in your family when growing up                                     | (Ref: No)                            |                      |                    |
|                                                                                          | Yes                                  | 1.32                 | 1.00               |
| Your health when growing up                                                              | (Ref: Good)                          |                      |                    |
|                                                                                          | Excellent                            | 1.52                 | 1.00               |
|                                                                                          | Fair                                 | 1.35                 | 1.00               |
|                                                                                          | Poor                                 | 1.27                 | 1.00               |
|                                                                                          | Very good                            | 1.48                 | 1.00               |
| Born in This country                                                                     | (Ref: Born in this country)          |                      |                    |
|                                                                                          | Born in another country              | 1.80                 | 1.25               |
| How Often You Attended Religious Services or Worshiped When You Were Around 12 Years Old | (Ref: Never)                         |                      |                    |
|                                                                                          | At least once a week                 | 1.45                 | 1.00               |
|                                                                                          | Less than once a month               | 1.13                 | 1.00               |
|                                                                                          | One to three times a month           | 1.36                 | 1.00               |
| Year of birth (age group)                                                                | (Ref: 1998-2005; current age: 18-24) |                      |                    |
|                                                                                          | 1943-1953 (current age: 70-79 years) | 1.55                 | 1.00               |
|                                                                                          | 1953-1963 (current age: 60-69 years) | 1.81                 | 1.00               |

| Variable                       | Category                                  | E-value for Estimate | E-value for 95% CI |
|--------------------------------|-------------------------------------------|----------------------|--------------------|
| Religion when twelve years old | 1963-1973 (current age: 50-59 years)      | 1.64                 | 1.00               |
|                                | 1973-1983 (current age: 40-49 years)      | 1.65                 | 1.00               |
|                                | 1983-1993 (current age: 30-39 years)      | 1.81                 | 1.00               |
|                                | 1993-1998 (current age: 25-29 years)      | 1.69                 | 1.00               |
|                                | (Ref: No religion/Atheist/Agnostic)       |                      |                    |
|                                | Buddhism                                  | 1.30                 | 1.00               |
|                                | Chinese folk/traditional religion         | 1.29                 | 1.00               |
|                                | Christianity                              | 1.05                 | 1.00               |
|                                | Collapsed affiliations with prevalence<3% | 1.46                 | 1.00               |

**Table S8a. India: Demographic descriptive statistics**

| <b>Characteristic</b>                    | <b>N = 8,206<sup>1</sup></b> |
|------------------------------------------|------------------------------|
| <b>Age group</b>                         |                              |
| 1943 or earlier (current age: 80+ years) | 39 (0.5%)                    |
| 1943-1953 (current age: 70-79 years)     | 208 (2.5%)                   |
| 1953-1963 (current age: 60-69 years)     | 800 (9.8%)                   |
| 1963-1973 (current age: 50-59 years)     | 936 (11%)                    |
| 1973-1983 (current age: 40-49 years)     | 1,406 (17%)                  |
| 1983-1993 (current age: 30-39 years)     | 1,919 (23%)                  |
| 1993-1998 (current age: 25-29 years)     | 982 (12%)                    |
| 1998-2005 (current age: 18-24 years)     | 1,915 (23%)                  |
| (Missing)                                | 0 (0%)                       |
| <b>Gender</b>                            |                              |
| 1. Male                                  | 4,207 (51%)                  |
| 2. Female                                | 3,999 (49%)                  |
| 3. Other                                 | 0 (0%)                       |
| (Missing)                                | 0 (0%)                       |
| <b>Marital status</b>                    |                              |
| 1. Single/Never been married             | 1,450 (18%)                  |
| 2. Married                               | 6,216 (76%)                  |
| 3. Separated                             | 32 (0.4%)                    |
| 4. Divorced                              | 14 (0.2%)                    |
| 5. Widowed                               | 274 (3.3%)                   |
| 6. Domestic partner                      | 181 (2.2%)                   |
| (Missing)                                | 39 (0.5%)                    |
| <b>Employment</b>                        |                              |
| 1. Employed for an employer              | 1,690 (21%)                  |
| 2. Self-employed                         | 2,185 (27%)                  |
| 3. Retired                               | 164 (2.0%)                   |
| 4. Student                               | 362 (4.4%)                   |
| 5. Homemaker                             | 2,688 (33%)                  |
| 6. Unemployed and looking for a job      | 610 (7.4%)                   |
| 7. None of these/Other                   | 476 (5.8%)                   |
| (Missing)                                | 30 (0.4%)                    |
| <b>Religious service attendance</b>      |                              |
| 1. More than once a week                 | 1,947 (24%)                  |
| 2. Once a week                           | 1,997 (24%)                  |
| 3. One to three times a month            | 1,803 (22%)                  |
| 4. A few times a year                    | 1,277 (16%)                  |
| 5. Never                                 | 1,137 (14%)                  |
| (Missing)                                | 44 (0.5%)                    |
| <b>Education</b>                         |                              |
| 1. Up to 8                               | 5,952 (73%)                  |
| 2. 9-15                                  | 1,842 (22%)                  |
| 3. 16+                                   | 410 (5.0%)                   |
| (Missing)                                | 2 (<0.1%)                    |
| <b>Immigration</b>                       |                              |
| 1. Born in this country                  | 8,118 (99%)                  |
| 2. Born in another country               | 77 (0.9%)                    |

| <b>Characteristic</b>                                       | <b>N = 8,206<sup>1</sup></b> |
|-------------------------------------------------------------|------------------------------|
| (Missing)                                                   | 11 (0.1%)                    |
| <b>Religious affiliation</b>                                |                              |
| 1. Christianity                                             | 191 (2.3%)                   |
| 10. Taoism                                                  | 0 (0%)                       |
| 11. Confucianism                                            | 0 (0%)                       |
| 12. Primal, Animist, or Folk religion                       | 19 (0.2%)                    |
| 13. Spiritism                                               | 0 (0%)                       |
| 14. Umbanda, Candomblé, and other African-derived religions | 0 (0%)                       |
| 15. Chinese folk/traditional religion                       | 0 (0%)                       |
| 2. Islam                                                    | 1,027 (13%)                  |
| 3. Hinduism                                                 | 6,640 (81%)                  |
| 4. Buddhism                                                 | 138 (1.7%)                   |
| 5. Judaism                                                  | 0 (0%)                       |
| 6. Sikhism                                                  | 86 (1.0%)                    |
| 7. Baha'i                                                   | 0 (0%)                       |
| 8. Jainism                                                  | 8 (<0.1%)                    |
| 9. Shinto                                                   | 2 (<0.1%)                    |
| 96. Some other religion                                     | 45 (0.5%)                    |
| 97. No religion/Atheist/Agnostic                            | 13 (0.2%)                    |
| (Missing)                                                   | 37 (0.4%)                    |
| <b>RACE ETHNICITY</b>                                       |                              |
| (Missing)                                                   | 163 (2.0%)                   |
| 601. India: General                                         | 2,239 (27%)                  |
| 602. India: Other backward caste                            | 2,744 (33%)                  |
| 603. India: Schedule caste                                  | 2,330 (28%)                  |
| 604. India: Schedule tribe                                  | 730 (8.9%)                   |

<sup>1</sup>n (%)

**Table S8b. India: Childhood descriptive statistics**

| <b>Characteristic</b>                      | <b>N = 8,206<sup>1</sup></b> |
|--------------------------------------------|------------------------------|
| <b>Age</b>                                 | 38 (15)                      |
| <b>Year of birth</b>                       |                              |
| 1943 or earlier (current age: 80+ years)   | 39 (0.5%)                    |
| 1943-1953 (current age: 70-79 years)       | 208 (2.5%)                   |
| 1953-1963 (current age: 60-69 years)       | 800 (9.8%)                   |
| 1963-1973 (current age: 50-59 years)       | 936 (11%)                    |
| 1973-1983 (current age: 40-49 years)       | 1,406 (17%)                  |
| 1983-1993 (current age: 30-39 years)       | 1,919 (23%)                  |
| 1993-1998 (current age: 25-29 years)       | 982 (12%)                    |
| 1998-2005 (current age: 18-24 years)       | 1,915 (23%)                  |
| (Missing)                                  | 0 (0%)                       |
| <b>Gender</b>                              |                              |
| 1. Male                                    | 4,207 (51%)                  |
| 2. Female                                  | 3,999 (49%)                  |
| 3. Other                                   | 0 (0%)                       |
| (Missing)                                  | 0 (0%)                       |
| <b>Parent marital status</b>               |                              |
| 1. Parents were married                    | 3,564 (43%)                  |
| 2. Parents were divorced                   | 151 (1.8%)                   |
| 3. Parents were never married              | 708 (8.6%)                   |
| 4. One or both of them had died            | 600 (7.3%)                   |
| 5. Unsure                                  | 24 (0.3%)                    |
| (Missing)                                  | 3,159 (38%)                  |
| <b>Age 12 religious service attendance</b> |                              |
| 1. At least once a week                    | 3,451 (42%)                  |
| 2. One to three times a month              | 1,881 (23%)                  |
| 3. Less than once a month                  | 1,731 (21%)                  |
| 4. Never                                   | 933 (11%)                    |
| (Missing)                                  | 210 (2.6%)                   |
| <b>Relationship with mother</b>            |                              |
| 1. Very good                               | 7,369 (90%)                  |
| 2. Somewhat good                           | 488 (5.9%)                   |
| 3. Somewhat bad                            | 56 (0.7%)                    |
| 4. Very bad                                | 44 (0.5%)                    |
| 97. (Does not apply)                       | 206 (2.5%)                   |
| (Missing)                                  | 44 (0.5%)                    |
| <b>Relationship with father</b>            |                              |
| 1. Very good                               | 7,025 (86%)                  |
| 2. Somewhat good                           | 628 (7.7%)                   |
| 3. Somewhat bad                            | 80 (1.0%)                    |
| 4. Very bad                                | 59 (0.7%)                    |
| 97. (Does not apply)                       | 333 (4.1%)                   |
| (Missing)                                  | 81 (1.0%)                    |
| <b>Outsider growing up</b>                 |                              |
| 1. Yes                                     | 1,275 (16%)                  |
| 2. No                                      | 6,892 (84%)                  |
| (Missing)                                  | 38 (0.5%)                    |

| Characteristic                                              | N = 8,206 <sup>1</sup> |
|-------------------------------------------------------------|------------------------|
| <b>Abuse</b>                                                |                        |
| 1. Yes                                                      | 980 (12%)              |
| 2. No                                                       | 6,712 (82%)            |
| (Missing)                                                   | 515 (6.3%)             |
| <b>Self-rated health growing up</b>                         |                        |
| 1. Excellent                                                | 1,420 (17%)            |
| 2. Very good                                                | 2,439 (30%)            |
| 3. Good                                                     | 2,553 (31%)            |
| 4. Fair                                                     | 1,472 (18%)            |
| 5. Poor                                                     | 294 (3.6%)             |
| (Missing)                                                   | 28 (0.3%)              |
| <b>Immigration status</b>                                   |                        |
| 1. Born in this country                                     | 8,118 (99%)            |
| 2. Born in another country                                  | 77 (0.9%)              |
| (Missing)                                                   | 11 (0.1%)              |
| <b>Subjective financial status of family growing up</b>     |                        |
| 1. Lived comfortably                                        | 3,057 (37%)            |
| 2. Got by                                                   | 1,985 (24%)            |
| 3. Found it difficult                                       | 1,736 (21%)            |
| 4. Found it very difficult                                  | 1,383 (17%)            |
| (Missing)                                                   | 45 (0.5%)              |
| <b>Religious affiliation</b>                                |                        |
| 1. Christianity                                             | 152 (1.8%)             |
| 10. Taoism                                                  | 0 (0%)                 |
| 11. Confucianism                                            | 0 (0%)                 |
| 12. Primal, Animist, or Folk religion                       | 17 (0.2%)              |
| 13. Spiritism                                               | 0 (0%)                 |
| 14. Umbanda, Candomblé, and other African-derived religions | 0 (0%)                 |
| 15. Chinese folk/traditional religion                       | 0 (0%)                 |
| 2. Islam                                                    | 1,025 (12%)            |
| 3. Hinduism                                                 | 6,687 (81%)            |
| 4. Buddhism                                                 | 110 (1.3%)             |
| 5. Judaism                                                  | 0 (0%)                 |
| 6. Sikhism                                                  | 82 (1.0%)              |
| 7. Baha'i                                                   | 0 (0%)                 |
| 8. Jainism                                                  | 7 (<0.1%)              |
| 9. Shinto                                                   | 2 (<0.1%)              |
| 96. Some other religion                                     | 37 (0.5%)              |
| 97. No religion/Atheist/Agnostic                            | 8 (<0.1%)              |
| (Missing)                                                   | 80 (1.0%)              |
| <b>Race/Ethnicity</b>                                       |                        |
| (Missing)                                                   | 163 (2.0%)             |
| 601. India: General                                         | 2,239 (27%)            |
| 602. India: Other backward caste                            | 2,744 (33%)            |
| 603. India: Schedule caste                                  | 2,330 (28%)            |
| 604. India: Schedule tribe                                  | 730 (8.9%)             |

<sup>1</sup>Mean (SD); n (%)

**Table S8c. Proportions by demographic category for India**

| Variable                     | Category                                 | Proportion | 95% CI         | SE    | p-value  |
|------------------------------|------------------------------------------|------------|----------------|-------|----------|
| Age group                    | 1998-2005 (current age: 18-24 years)     | 0.681      | (0.644, 0.718) | 0.019 | 1.67e-06 |
|                              | 1943 or earlier (current age: 80+ years) | 0.549      | (0.303, 0.795) | 0.120 |          |
|                              | 1943-1953 (current age: 70-79 years)     | 0.501      | (0.403, 0.598) | 0.049 |          |
|                              | 1953-1963 (current age: 60-69 years)     | 0.507      | (0.450, 0.564) | 0.029 |          |
|                              | 1963-1973 (current age: 50-59 years)     | 0.586      | (0.541, 0.630) | 0.023 |          |
|                              | 1973-1983 (current age: 40-49 years)     | 0.641      | (0.610, 0.671) | 0.016 |          |
|                              | 1983-1993 (current age: 30-39 years)     | 0.627      | (0.600, 0.654) | 0.014 |          |
|                              | 1993-1998 (current age: 25-29 years)     | 0.624      | (0.588, 0.660) | 0.018 |          |
|                              | Male                                     | 0.668      | (0.647, 0.689) | 0.011 |          |
|                              | Female                                   | 0.573      | (0.549, 0.596) | 0.012 |          |
| Gender                       | Other                                    | *          | *              | *     | 5.08e-10 |
| Marital status               | Single/Never been married                | 0.698      | (0.659, 0.738) | 0.020 | 1.57e-09 |
|                              | Divorced                                 | 0.871      | (0.665, 1.000) | 0.083 |          |
|                              | Domestic partner                         | 0.452      | (0.351, 0.553) | 0.051 |          |
|                              | Married                                  | 0.617      | (0.599, 0.635) | 0.009 |          |
|                              | Separated                                | 0.461      | (0.186, 0.736) | 0.133 |          |
|                              | Widowed                                  | 0.436      | (0.345, 0.527) | 0.046 |          |
|                              | Employed for an employer                 | 0.630      | (0.596, 0.664) | 0.017 | 3.09e-06 |
| Employment                   | Homemaker                                | 0.575      | (0.547, 0.604) | 0.014 |          |
|                              | None of these/Other                      | 0.645      | (0.574, 0.716) | 0.036 |          |
|                              | Retired                                  | 0.510      | (0.407, 0.614) | 0.052 |          |
|                              | Self-employed                            | 0.643      | (0.613, 0.672) | 0.015 |          |
|                              | Student                                  | 0.728      | (0.669, 0.787) | 0.030 |          |
|                              | Unemployed and looking for a job         | 0.675      | (0.621, 0.729) | 0.028 |          |
| Religious service attendance | Never                                    | 0.551      | (0.509, 0.594) | 0.022 | 2.70e-03 |
|                              | A few times a year                       | 0.654      | (0.617, 0.692) | 0.019 |          |
|                              | More than once a week                    | 0.654      | (0.622, 0.687) | 0.017 |          |
|                              | Once a week                              | 0.613      | (0.580, 0.645) | 0.017 |          |
|                              | One to three times a month               | 0.617      | (0.583, 0.651) | 0.017 |          |
| Education                    | 9-15                                     | 0.704      | (0.680, 0.728) | 0.012 | 6.66e-16 |
|                              | 16+                                      | 0.729      | (0.685, 0.773) | 0.022 |          |

| Variable                 | Category                                                          | Proportion | 95% CI         | SE    | p-value  |
|--------------------------|-------------------------------------------------------------------|------------|----------------|-------|----------|
| Immigration status       | Up to 8<br>Born in this<br>country                                | 0.588      | (0.568, 0.609) | 0.010 | 5.42e-01 |
|                          | Born in another<br>country                                        | 0.622      | (0.605, 0.639) | 0.009 |          |
|                          | No<br>religion/Atheist/Ag<br>nostic                               | 0.577      | (0.428, 0.725) | 0.074 |          |
| Religious<br>affiliation | Christianity                                                      | *          | *              | *     | 5.40e-05 |
|                          | Combined                                                          | *          | *              | *     |          |
|                          | Spiritism                                                         | 0.571      | (0.517, 0.624) | 0.027 |          |
|                          | Umbanda,<br>Candomblé, and<br>other African-<br>derived religions | *          | *              | *     |          |
|                          | Buddhism                                                          | *          | *              | *     |          |
|                          | Islam                                                             | 0.535      | (0.486, 0.584) | 0.025 |          |
|                          | Chinese<br>folk/traditional<br>religion                           | *          | *              | *     |          |
|                          | Hinduism                                                          | 0.639      | (0.621, 0.657) | 0.009 |          |
|                          | Judaism                                                           | *          | *              | *     |          |
|                          | Primal, Animist, or<br>Folk religion                              | *          | *              | *     |          |

**Table S8d. India: Childhood predictors regression analysis**

| Variable                                                        | Category                                                                                                                | Risk-Ratio                       | logRR SE                         | RR 95% CI                                                | Global p-value |
|-----------------------------------------------------------------|-------------------------------------------------------------------------------------------------------------------------|----------------------------------|----------------------------------|----------------------------------------------------------|----------------|
| Relationship with your mother growing up                        | (Ref: Very bad/somewhat bad)<br>Very good/somewhat good                                                                 | 0.923                            | 0.048                            | (0.84,1.01)                                              | 0.114          |
| Relationship with your father growing up                        | (Ref: Very bad/somewhat bad)<br>Very good/somewhat good                                                                 | 0.981                            | 0.047                            | (0.89,1.08)                                              | 0.546          |
| Parents married to each other when you were around 12 years old | (Ref: Parents married)<br>One or both of them had died<br>Parents were divorced<br>Parents were never married<br>Unsure | 0.987<br>1.073<br>0.996<br>1.078 | 0.029<br>0.044<br>0.028<br>0.086 | (0.93,1.04)<br>(0.98,1.17)<br>(0.94,1.05)<br>(0.91,1.28) | 0.457          |
| Feelings about familys household income when growing up         | (Ref: Got by)<br>Found it difficult<br>Found it very difficult<br>Lived comfortably                                     | 1.002<br>0.952<br>1.045          | 0.022<br>0.026<br>0.019          | (0.96,1.05)<br>(0.90,1.00)<br>(1.01,1.08)                | 0.054          |
| Physically or sexually abused when growing up                   | (Ref: No)                                                                                                               | 1.048                            | 0.024                            | (1.00,1.10)                                              | 0.058          |
| Felt like an outsider in your family when growing up            | (Ref: No)<br>Yes                                                                                                        | 1.049                            | 0.022                            | (1.01,1.09)                                              | 0.031          |
| Your health when growing up                                     | (Ref: Good)<br>Excellent<br>Fair<br>Poor<br>Very good                                                                   | 1.050<br>1.016<br>1.025<br>1.046 | 0.024<br>0.023<br>0.042<br>0.020 | (1.00,1.10)<br>(0.97,1.06)<br>(0.95,1.11)<br>(1.01,1.09) | 0.073          |
| Born in This                                                    | (Ref: Born in this                                                                                                      |                                  |                                  |                                                          | 0.582          |

| Variable                                                                                  | Category                                  | Risk-Ratio | logRR SE | RR 95% CI   | Global p-value |
|-------------------------------------------------------------------------------------------|-------------------------------------------|------------|----------|-------------|----------------|
| country                                                                                   | country)                                  |            |          |             |                |
|                                                                                           | Born in another country                   | 0.985      | 0.073    | (0.85,1.14) |                |
| How Often You Attended Religious Services or Worshipped When You Were Around 12 Years Old | (Ref: Never)                              |            |          |             | 0.494          |
|                                                                                           | At least once a week                      | 1.028      | 0.025    | (0.98,1.08) |                |
|                                                                                           | Less than once a month                    | 1.016      | 0.027    | (0.96,1.07) |                |
|                                                                                           | One to three times a month                | 1.027      | 0.027    | (0.97,1.08) |                |
| Year of birth (age group)                                                                 | (Ref: 1998-2005; current age: 18-24)      |            |          |             | 4.65e-05       |
|                                                                                           | 1943 or earlier (current age: 80+ years)  | 0.874      | 0.118    | (0.69,1.10) |                |
|                                                                                           | 1943-1953 (current age: 70-79 years)      | 0.847      | 0.052    | (0.76,0.94) |                |
|                                                                                           | 1953-1963 (current age: 60-69 years)      | 0.860      | 0.034    | (0.81,0.92) |                |
|                                                                                           | 1963-1973 (current age: 50-59 years)      | 0.918      | 0.029    | (0.87,0.97) |                |
|                                                                                           | 1973-1983 (current age: 40-49 years)      | 0.967      | 0.024    | (0.92,1.01) |                |
|                                                                                           | 1983-1993 (current age: 30-39 years)      | 0.957      | 0.023    | (0.91,1.00) |                |
|                                                                                           | 1993-1998 (current age: 25-29 years)      | 0.943      | 0.025    | (0.90,0.99) |                |
| Religion when twelve years old                                                            | (Ref: Hinduism)                           |            |          |             | 2.68e-05       |
|                                                                                           | Collapsed affiliations with prevalence<3% | 0.947      | 0.031    | (0.89,1.01) |                |
|                                                                                           | Islam                                     | 0.898      | 0.025    | (0.86,0.94) |                |
| Race plurality (prominent race/ethnic group [0] or not [1])                               | (Ref: Plurality group)                    |            |          |             | 0.326          |
|                                                                                           | Non-plurality groups                      | 0.982      | 0.017    | (0.95,1.02) |                |

**Table S8e. India: Sensitivity to unmeasured confounding of childhood predictors**

| Variable                                                                                  | Category                                                                                                                 | E-value for Estimate         | E-value for 95% CI           |
|-------------------------------------------------------------------------------------------|--------------------------------------------------------------------------------------------------------------------------|------------------------------|------------------------------|
| Relationship with your mother growing up                                                  | (Ref: Very bad/somewhat bad)<br>Very good/somewhat good                                                                  | 1.38                         | 1.00                         |
| Relationship with your father growing up                                                  | (Ref: Very bad/somewhat bad)<br>Very good/somewhat good                                                                  | 1.16                         | 1.00                         |
| Parents married to each other when you were around 12 years old                           | (Ref: Parents married)<br>One or both of them had died<br>Parents were divorced<br>Parents were never married<br>Unsure  | 1.13<br>1.35<br>1.07<br>1.37 | 1.00<br>1.00<br>1.00<br>1.00 |
| Feelings about familys household income when growing up                                   | (Ref: Got by)<br>Found it difficult<br>Found it very difficult<br>Lived comfortably                                      | 1.05<br>1.28<br>1.26         | 1.00<br>1.00<br>1.09         |
| Physically or sexually abused when growing up                                             | (Ref: No)                                                                                                                | 1.27                         | 1.00                         |
| Felt like an outsider in your family when growing up                                      | (Ref: No)<br>Yes                                                                                                         | 1.28                         | 1.08                         |
| Your health when growing up                                                               | (Ref: Good)<br>Excellent<br>Fair<br>Poor<br>Very good                                                                    | 1.28<br>1.15<br>1.19<br>1.27 | 1.04<br>1.00<br>1.00<br>1.09 |
| Born in This country                                                                      | (Ref: Born in this country)<br>Born in another country                                                                   | 1.14                         | 1.00                         |
| How Often You Attended Religious Services or Worshipped When You Were Around 12 Years Old | (Ref: Never)<br>At least once a week<br>Less than once a month<br>One to three times a month<br>(Ref: 1998-2005; current | 1.20<br>1.14<br>1.20         | 1.00<br>1.00<br>1.00         |
| Year of birth (age group)                                                                 | age: 18-24)<br>1943 or earlier (current age:                                                                             | 1.55                         | 1.00                         |

| Variable                                                    | Category                                  | E-value for Estimate | E-value for 95% CI |
|-------------------------------------------------------------|-------------------------------------------|----------------------|--------------------|
|                                                             | 80+ years)                                |                      |                    |
|                                                             | 1943-1953 (current age: 70-79 years)      | 1.64                 | 1.33               |
|                                                             | 1953-1963 (current age: 60-69 years)      | 1.60                 | 1.40               |
|                                                             | 1963-1973 (current age: 50-59 years)      | 1.40                 | 1.20               |
|                                                             | 1973-1983 (current age: 40-49 years)      | 1.22                 | 1.00               |
|                                                             | 1983-1993 (current age: 30-39 years)      | 1.26                 | 1.00               |
|                                                             | 1993-1998 (current age: 25-29 years)      | 1.31                 | 1.11               |
| Religion when twelve years old                              | (Ref: Hinduism)                           |                      |                    |
|                                                             | Collapsed affiliations with prevalence<3% | 1.30                 | 1.00               |
|                                                             | Islam                                     | 1.47                 | 1.31               |
| Race plurality (prominent race/ethnic group [0] or not [1]) | (Ref: Plurality group)                    |                      |                    |
|                                                             | Non-plurality groups                      | 1.16                 | 1.00               |

**Table S9a. Indonesia: Demographic descriptive statistics**

| <b>Characteristic</b>                    | <b>N = 2,675<sup>1</sup></b> |
|------------------------------------------|------------------------------|
| <b>Age group</b>                         |                              |
| 1943 or earlier (current age: 80+ years) | 11 (0.4%)                    |
| 1943-1953 (current age: 70-79 years)     | 34 (1.3%)                    |
| 1953-1963 (current age: 60-69 years)     | 196 (7.3%)                   |
| 1963-1973 (current age: 50-59 years)     | 444 (17%)                    |
| 1973-1983 (current age: 40-49 years)     | 546 (20%)                    |
| 1983-1993 (current age: 30-39 years)     | 598 (22%)                    |
| 1993-1998 (current age: 25-29 years)     | 322 (12%)                    |
| 1998-2005 (current age: 18-24 years)     | 523 (20%)                    |
| (Missing)                                | 0 (0%)                       |
| <b>Gender</b>                            |                              |
| 1. Male                                  | 1,342 (50%)                  |
| 2. Female                                | 1,329 (50%)                  |
| 3. Other                                 | 1 (<0.1%)                    |
| (Missing)                                | 3 (0.1%)                     |
| <b>Marital status</b>                    |                              |
| 1. Single/Never been married             | 592 (22%)                    |
| 2. Married                               | 1,794 (67%)                  |
| 3. Separated                             | 19 (0.7%)                    |
| 4. Divorced                              | 70 (2.6%)                    |
| 5. Widowed                               | 185 (6.9%)                   |
| 6. Domestic partner                      | 6 (0.2%)                     |
| (Missing)                                | 8 (0.3%)                     |
| <b>Employment</b>                        |                              |
| 1. Employed for an employer              | 453 (17%)                    |
| 2. Self-employed                         | 932 (35%)                    |
| 3. Retired                               | 25 (0.9%)                    |
| 4. Student                               | 129 (4.8%)                   |
| 5. Homemaker                             | 773 (29%)                    |
| 6. Unemployed and looking for a job      | 203 (7.6%)                   |
| 7. None of these/Other                   | 155 (5.8%)                   |
| (Missing)                                | 4 (0.2%)                     |
| <b>Religious service attendance</b>      |                              |
| 1. More than once a week                 | 981 (37%)                    |
| 2. Once a week                           | 1,015 (38%)                  |
| 3. One to three times a month            | 313 (12%)                    |
| 4. A few times a year                    | 246 (9.2%)                   |
| 5. Never                                 | 113 (4.2%)                   |
| (Missing)                                | 6 (0.2%)                     |
| <b>Education</b>                         |                              |
| 1. Up to 8                               | 1,390 (52%)                  |
| 2. 9-15                                  | 1,169 (44%)                  |
| 3. 16+                                   | 115 (4.3%)                   |
| (Missing)                                | 1 (<0.1%)                    |
| <b>Immigration</b>                       |                              |
| 1. Born in this country                  | 2,664 (100%)                 |
| 2. Born in another country               | 11 (0.4%)                    |

| <b>Characteristic</b>                                       | <b>N = 2,675<sup>1</sup></b> |
|-------------------------------------------------------------|------------------------------|
| (Missing)                                                   | 0 (0%)                       |
| <b>Religious affiliation</b>                                |                              |
| 1. Christianity                                             | 205 (7.6%)                   |
| 10. Taoism                                                  | 1 (<0.1%)                    |
| 11. Confucianism                                            | 0 (0%)                       |
| 12. Primal, Animist, or Folk religion                       | 0 (0%)                       |
| 13. Spiritism                                               | 0 (0%)                       |
| 14. Umbanda, Candomblé, and other African-derived religions | 0 (0%)                       |
| 15. Chinese folk/traditional religion                       | 0 (0%)                       |
| 2. Islam                                                    | 2,434 (91%)                  |
| 3. Hinduism                                                 | 31 (1.2%)                    |
| 4. Buddhism                                                 | 1 (<0.1%)                    |
| 5. Judaism                                                  | 0 (0%)                       |
| 6. Sikhism                                                  | 0 (0%)                       |
| 7. Baha'i                                                   | 0 (0%)                       |
| 8. Jainism                                                  | 0 (0%)                       |
| 9. Shinto                                                   | 0 (0%)                       |
| 96. Some other religion                                     | 3 (<0.1%)                    |
| 97. No religion/Atheist/Agnostic                            | 0 (0%)                       |
| (Missing)                                                   | 0 (0%)                       |
| <b>RACE ETHNICITY</b>                                       |                              |
| (Missing)                                                   | 16 (0.6%)                    |
| 701. Indonesia: Banjar/Melayu Banjar                        | 138 (5.2%)                   |
| 702. Indonesia: Betawi                                      | 67 (2.5%)                    |
| 703. Indonesia: Bugis                                       | 93 (3.5%)                    |
| 704. Indonesia: Jawa                                        | 1,043 (39%)                  |
| 705. Indonesia: Madura                                      | 109 (4.1%)                   |
| 706. Indonesia: Minangkabau                                 | 117 (4.4%)                   |
| 707. Indonesia: Sunda/Parahyangan                           | 493 (18%)                    |
| 708. Indonesia: Bali                                        | 30 (1.1%)                    |
| 709. Indonesia: Batak                                       | 55 (2.0%)                    |
| 710. Indonesia: Makasar                                     | 31 (1.2%)                    |
| 9996. Other                                                 | 483 (18%)                    |

<sup>1</sup>n (%)

**Table S9b. Indonesia: Childhood descriptive statistics**

| <b>Characteristic</b>                      | <b>N = 2,675<sup>1</sup></b> |
|--------------------------------------------|------------------------------|
| <b>Age</b>                                 | 39 (14)                      |
| <b>Year of birth</b>                       |                              |
| 1943 or earlier (current age: 80+ years)   | 11 (0.4%)                    |
| 1943-1953 (current age: 70-79 years)       | 34 (1.3%)                    |
| 1953-1963 (current age: 60-69 years)       | 196 (7.3%)                   |
| 1963-1973 (current age: 50-59 years)       | 444 (17%)                    |
| 1973-1983 (current age: 40-49 years)       | 546 (20%)                    |
| 1983-1993 (current age: 30-39 years)       | 598 (22%)                    |
| 1993-1998 (current age: 25-29 years)       | 322 (12%)                    |
| 1998-2005 (current age: 18-24 years)       | 523 (20%)                    |
| (Missing)                                  | 0 (0%)                       |
| <b>Gender</b>                              |                              |
| 1. Male                                    | 1,342 (50%)                  |
| 2. Female                                  | 1,329 (50%)                  |
| 3. Other                                   | 1 (<0.1%)                    |
| (Missing)                                  | 3 (0.1%)                     |
| <b>Parent marital status</b>               |                              |
| 1. Parents were married                    | 2,032 (76%)                  |
| 2. Parents were divorced                   | 219 (8.2%)                   |
| 3. Parents were never married              | 18 (0.7%)                    |
| 4. One or both of them had died            | 352 (13%)                    |
| 5. Unsure                                  | 30 (1.1%)                    |
| (Missing)                                  | 24 (0.9%)                    |
| <b>Age 12 religious service attendance</b> |                              |
| 1. At least once a week                    | 2,042 (76%)                  |
| 2. One to three times a month              | 390 (15%)                    |
| 3. Less than once a month                  | 115 (4.3%)                   |
| 4. Never                                   | 111 (4.1%)                   |
| (Missing)                                  | 17 (0.6%)                    |
| <b>Relationship with mother</b>            |                              |
| 1. Very good                               | 2,363 (88%)                  |
| 2. Somewhat good                           | 245 (9.2%)                   |
| 3. Somewhat bad                            | 20 (0.8%)                    |
| 4. Very bad                                | 12 (0.4%)                    |
| 97. (Does not apply)                       | 19 (0.7%)                    |
| (Missing)                                  | 16 (0.6%)                    |
| <b>Relationship with father</b>            |                              |
| 1. Very good                               | 2,290 (86%)                  |
| 2. Somewhat good                           | 283 (11%)                    |
| 3. Somewhat bad                            | 26 (1.0%)                    |
| 4. Very bad                                | 16 (0.6%)                    |
| 97. (Does not apply)                       | 35 (1.3%)                    |
| (Missing)                                  | 25 (0.9%)                    |
| <b>Outsider growing up</b>                 |                              |
| 1. Yes                                     | 145 (5.4%)                   |
| 2. No                                      | 2,525 (94%)                  |
| (Missing)                                  | 4 (0.2%)                     |

| Characteristic                                              | N = 2,675 <sup>1</sup> |
|-------------------------------------------------------------|------------------------|
| <b>Abuse</b>                                                |                        |
| 1. Yes                                                      | 221 (8.3%)             |
| 2. No                                                       | 2,442 (91%)            |
| (Missing)                                                   | 11 (0.4%)              |
| <b>Self-rated health growing up</b>                         |                        |
| 1. Excellent                                                | 441 (16%)              |
| 2. Very good                                                | 725 (27%)              |
| 3. Good                                                     | 967 (36%)              |
| 4. Fair                                                     | 524 (20%)              |
| 5. Poor                                                     | 18 (0.7%)              |
| (Missing)                                                   | 0 (0%)                 |
| <b>Immigration status</b>                                   |                        |
| 1. Born in this country                                     | 2,664 (100%)           |
| 2. Born in another country                                  | 11 (0.4%)              |
| (Missing)                                                   | 0 (0%)                 |
| <b>Subjective financial status of family growing up</b>     |                        |
| 1. Lived comfortably                                        | 1,161 (43%)            |
| 2. Got by                                                   | 1,217 (45%)            |
| 3. Found it difficult                                       | 191 (7.1%)             |
| 4. Found it very difficult                                  | 104 (3.9%)             |
| (Missing)                                                   | 2 (<0.1%)              |
| <b>Religious affiliation</b>                                |                        |
| 1. Christianity                                             | 210 (7.9%)             |
| 10. Taoism                                                  | 0 (0%)                 |
| 11. Confucianism                                            | 0 (0%)                 |
| 12. Primal, Animist, or Folk religion                       | 0 (<0.1%)              |
| 13. Spiritism                                               | 0 (0%)                 |
| 14. Umbanda, Candomblé, and other African-derived religions | 0 (0%)                 |
| 15. Chinese folk/traditional religion                       | 0 (0%)                 |
| 2. Islam                                                    | 2,426 (91%)            |
| 3. Hinduism                                                 | 31 (1.2%)              |
| 4. Buddhism                                                 | 5 (0.2%)               |
| 5. Judaism                                                  | 0 (0%)                 |
| 6. Sikhism                                                  | 0 (0%)                 |
| 7. Baha'i                                                   | 0 (0%)                 |
| 8. Jainism                                                  | 0 (0%)                 |
| 9. Shinto                                                   | 0 (0%)                 |
| 96. Some other religion                                     | 0 (0%)                 |
| 97. No religion/Atheist/Agnostic                            | 2 (<0.1%)              |
| (Missing)                                                   | 0 (<0.1%)              |
| <b>Race/Ethnicity</b>                                       |                        |
| (Missing)                                                   | 16 (0.6%)              |
| 701. Indonesia: Banjar/Melayu Banjar                        | 138 (5.2%)             |
| 702. Indonesia: Betawi                                      | 67 (2.5%)              |
| 703. Indonesia: Bugis                                       | 93 (3.5%)              |
| 704. Indonesia: Jawa                                        | 1,043 (39%)            |
| 705. Indonesia: Madura                                      | 109 (4.1%)             |

| Characteristic                    | N = 2,675 <sup>1</sup> |
|-----------------------------------|------------------------|
| 706. Indonesia: Minangkabau       | 117 (4.4%)             |
| 707. Indonesia: Sunda/Parahyangan | 493 (18%)              |
| 708. Indonesia: Bali              | 30 (1.1%)              |
| 709. Indonesia: Batak             | 55 (2.0%)              |
| 710. Indonesia: Makasar           | 31 (1.2%)              |
| 9996. Other                       | 483 (18%)              |

<sup>1</sup>Mean (SD); n (%)

**Table S9c. Indonesia: Proportions by demographic category**

| Variable                     | Category                                 | Proportion | 95% CI         | SE    | p-value  |
|------------------------------|------------------------------------------|------------|----------------|-------|----------|
| Age group                    | 1998-2005 (current age: 18-24 years)     | 0.895      | (0.851, 0.940) | 0.023 | 6.76e-09 |
|                              | 1943 or earlier (current age: 80+ years) | 0.695      | (0.000, 1.000) | 0.246 |          |
|                              | 1943-1953 (current age: 70-79 years)     | 0.540      | (0.246, 0.835) | 0.143 |          |
|                              | 1953-1963 (current age: 60-69 years)     | 0.628      | (0.504, 0.751) | 0.062 |          |
|                              | 1963-1973 (current age: 50-59 years)     | 0.687      | (0.613, 0.761) | 0.038 |          |
|                              | 1973-1983 (current age: 40-49 years)     | 0.746      | (0.692, 0.801) | 0.028 |          |
|                              | 1983-1993 (current age: 30-39 years)     | 0.819      | (0.780, 0.859) | 0.020 |          |
|                              | 1993-1998 (current age: 25-29 years)     | 0.889      | (0.843, 0.934) | 0.023 |          |
|                              | Male                                     | 0.800      | (0.767, 0.834) | 0.017 |          |
|                              | Female                                   | 0.775      | (0.743, 0.806) | 0.016 |          |
| Gender                       | Other                                    | 1.000      | *              | *     | < 1e-16  |
| Marital status               | Single/Never been married                | 0.907      | (0.873, 0.941) | 0.017 |          |
|                              | Divorced                                 | 0.781      | (0.651, 0.912) | 0.065 |          |
|                              | Domestic partner                         | 0.740      | *              | *     |          |
|                              | Married                                  | 0.764      | (0.734, 0.793) | 0.015 |          |
|                              | Separated                                | 0.733      | (0.495, 0.971) | 0.108 |          |
|                              | Widowed                                  | 0.644      | (0.522, 0.767) | 0.062 |          |
|                              | Employed for an employer                 | 0.788      | (0.728, 0.848) | 0.031 |          |
| Employment                   | Homemaker                                | 0.755      | (0.712, 0.799) | 0.022 | 1.15e-12 |
|                              | None of these/Other                      | 0.680      | (0.558, 0.802) | 0.062 |          |
|                              | Retired                                  | 0.737      | (0.549, 0.925) | 0.088 |          |
|                              | Self-employed                            | 0.795      | (0.755, 0.834) | 0.020 |          |
|                              | Student                                  | 0.959      | (0.918, 1.000) | 0.021 |          |
|                              | Unemployed and looking for a job         | 0.857      | (0.789, 0.925) | 0.035 |          |
|                              | Religious service attendance             |            |                |       |          |
| Religious service attendance | Never                                    | 0.795      | (0.681, 0.909) | 0.057 | 5.14e-01 |
|                              | A few times a year                       | 0.820      | (0.756, 0.883) | 0.032 |          |
|                              | More than once a week                    | 0.794      | (0.755, 0.834) | 0.020 |          |
|                              | Once a week                              | 0.765      | (0.728, 0.802) | 0.019 |          |
|                              | One to three times a month               | 0.813      | (0.748, 0.878) | 0.033 |          |
| Education                    | 9-15                                     | 0.882      | (0.864, 0.901) | 0.009 | < 1e-16  |
|                              | 16+                                      | 0.925      | (0.886, 0.963) | 0.019 |          |

| Variable                 | Category                                                          | Proportion | 95% CI         | SE    | p-value  |
|--------------------------|-------------------------------------------------------------------|------------|----------------|-------|----------|
| Immigration status       | Up to 8<br>Born in this<br>country                                | 0.696      | (0.657, 0.736) | 0.020 | 4.26e-01 |
|                          | Born in another<br>country                                        | 0.787      | (0.764, 0.810) | 0.012 |          |
|                          | No<br>religion/Atheist/Ag<br>nostic                               | 0.877      | (0.613, 1.000) | 0.112 |          |
| Religious<br>affiliation | Christianity                                                      | *          | *              | *     | 9.05e-01 |
|                          | Combined                                                          | 0.801      | (0.724, 0.879) | 0.039 |          |
|                          | Spiritism                                                         | 0.806      | (0.619, 0.993) | 0.092 |          |
|                          | Umbanda,<br>Candomblé, and<br>other African-<br>derived religions | *          | *              | *     |          |
|                          | Buddhism                                                          | *          | *              | *     |          |
|                          | Islam                                                             | 0.786      | (0.762, 0.811) | 0.012 |          |
|                          | Chinese<br>folk/traditional<br>religion                           | *          | *              | *     |          |
|                          | Hinduism                                                          | *          | *              | *     |          |
|                          | Judaism                                                           | *          | *              | *     |          |
|                          | Primal, Animist, or<br>Folk religion                              | *          | *              | *     |          |

**Table S9d. Indonesia: Childhood predictors regression analysis**

| Variable                                                        | Category                                                                                                                | Risk-Ratio                       | logRR SE                         | RR 95% CI                                                | Global p-value |
|-----------------------------------------------------------------|-------------------------------------------------------------------------------------------------------------------------|----------------------------------|----------------------------------|----------------------------------------------------------|----------------|
| Relationship with your mother growing up                        | (Ref: Very bad/somewhat bad)<br>Very good/somewhat good                                                                 | 0.969                            | 0.089                            | (0.81,1.15)                                              | 0.556          |
| Relationship with your father growing up                        | (Ref: Very bad/somewhat bad)<br>Very good/somewhat good                                                                 | 1.007                            | 0.063                            | (0.89,1.14)                                              | 0.598          |
| Parents married to each other when you were around 12 years old | (Ref: Parents married)<br>One or both of them had died<br>Parents were divorced<br>Parents were never married<br>Unsure | 0.994<br>1.002<br>1.182<br>0.959 | 0.040<br>0.039<br>0.127<br>0.125 | (0.92,1.08)<br>(0.93,1.08)<br>(0.92,1.52)<br>(0.75,1.23) | 0.645          |
| Feelings about familys household income when growing up         | (Ref: Got by)<br>Found it difficult<br>Found it very difficult<br>Lived comfortably                                     | 1.040<br>1.084<br>1.024          | 0.049<br>0.068<br>0.022          | (0.95,1.14)<br>(0.95,1.24)<br>(0.98,1.07)                | 0.435          |
| Physically or sexually abused when growing up                   | (Ref: No)                                                                                                               | 0.997                            | 0.046                            | (0.91,1.09)                                              | 0.606          |
| Felt like an outsider in your family when growing up            | (Ref: No)<br>Yes                                                                                                        | 1.022                            | 0.053                            | (0.92,1.13)                                              | 0.544          |
| Your health when growing up                                     | (Ref: Good)<br>Excellent<br>Fair<br>Poor<br>Very good                                                                   | 1.030<br>1.036<br>1.024<br>1.013 | 0.033<br>0.033<br>0.140<br>0.030 | (0.97,1.10)<br>(0.97,1.10)<br>(0.78,1.35)<br>(0.96,1.07) | 0.644          |
| Born in This                                                    | (Ref: Born in this                                                                                                      |                                  |                                  |                                                          | 0.538          |

| Variable                                                                                  | Category                                  | Risk-Ratio | logRR SE | RR 95% CI   | Global p-value |
|-------------------------------------------------------------------------------------------|-------------------------------------------|------------|----------|-------------|----------------|
| country                                                                                   | country)                                  |            |          |             |                |
|                                                                                           | Born in another country                   | 1.056      | 0.128    | (0.82,1.36) |                |
| How Often You Attended Religious Services or Worshipped When You Were Around 12 Years Old | (Ref: Never)                              |            |          |             | 0.439          |
|                                                                                           | At least once a week                      | 1.008      | 0.061    | (0.89,1.14) |                |
|                                                                                           | Less than once a month                    | 1.087      | 0.070    | (0.95,1.25) |                |
|                                                                                           | One to three times a month                | 0.915      | 0.071    | (0.80,1.05) |                |
| Year of birth (age group)                                                                 | (Ref: 1998-2005; current age: 18-24)      |            |          |             | 1.32e-05       |
|                                                                                           | 1943 or earlier (current age: 80+ years)  | 0.773      | 0.252    | (0.47,1.27) |                |
|                                                                                           | 1943-1953 (current age: 70-79 years)      | 0.680      | 0.141    | (0.52,0.90) |                |
|                                                                                           | 1953-1963 (current age: 60-69 years)      | 0.758      | 0.067    | (0.66,0.87) |                |
|                                                                                           | 1963-1973 (current age: 50-59 years)      | 0.806      | 0.045    | (0.74,0.88) |                |
|                                                                                           | 1973-1983 (current age: 40-49 years)      | 0.860      | 0.035    | (0.80,0.92) |                |
|                                                                                           | 1983-1993 (current age: 30-39 years)      | 0.927      | 0.029    | (0.88,0.98) |                |
|                                                                                           | 1993-1998 (current age: 25-29 years)      | 0.995      | 0.030    | (0.94,1.06) |                |
| Religion when twelve years old                                                            | (Ref: Islam)                              |            |          |             | 0.448          |
|                                                                                           | Christianity                              | 1.054      | 0.047    | (0.96,1.16) |                |
|                                                                                           | Collapsed affiliations with prevalence<3% | 1.069      | 0.100    | (0.88,1.30) |                |
| Race plurality (prominent race/ethnic group [0] or not [1])                               | (Ref: Plurality group)                    |            |          |             | 0.001          |
|                                                                                           | Non-plurality groups                      | 0.932      | 0.022    | (0.89,0.97) |                |

**Table S9e. Indonesia: Sensitivity to unmeasured confounding of childhood predictors**

| Variable                                                                                 | Category                                                                                                                 | E-value for Estimate         | E-value for 95% CI           |
|------------------------------------------------------------------------------------------|--------------------------------------------------------------------------------------------------------------------------|------------------------------|------------------------------|
| Relationship with your mother growing up                                                 | (Ref: Very bad/somewhat bad)<br>Very good/somewhat good                                                                  | 1.21                         | 1.00                         |
| Relationship with your father growing up                                                 | (Ref: Very bad/somewhat bad)<br>Very good/somewhat good                                                                  | 1.09                         | 1.00                         |
| Parents married to each other when you were around 12 years old                          | (Ref: Parents married)<br>One or both of them had died<br>Parents were divorced<br>Parents were never married<br>Unsure  | 1.08<br>1.04<br>1.65<br>1.25 | 1.00<br>1.00<br>1.00<br>1.00 |
| Feelings about familys household income when growing up                                  | (Ref: Got by)<br>Found it difficult<br>Found it very difficult<br>Lived comfortably                                      | 1.24<br>1.38<br>1.18         | 1.00<br>1.00<br>1.00         |
| Physically or sexually abused when growing up                                            | (Ref: No)                                                                                                                | 1.06                         | 1.00                         |
| Felt like an outsider in your family when growing up                                     | (Ref: No)<br>Yes                                                                                                         | 1.17                         | 1.00                         |
| Your health when growing up                                                              | (Ref: Good)<br>Excellent<br>Fair<br>Poor<br>Very good                                                                    | 1.21<br>1.23<br>1.18<br>1.13 | 1.00<br>1.00<br>1.00<br>1.00 |
| Born in This country                                                                     | (Ref: Born in this country)<br>Born in another country                                                                   | 1.30                         | 1.00                         |
| How Often You Attended Religious Services or Worshiped When You Were Around 12 Years Old | (Ref: Never)<br>At least once a week<br>Less than once a month<br>One to three times a month                             | 1.10<br>1.39<br>1.41         | 1.00<br>1.00<br>1.00         |
| Year of birth (age group)                                                                | (Ref: 1998-2005; current age: 18-24)<br>1943 or earlier (current age: 80+ years)<br>1943-1953 (current age: 70-79 years) | 1.91<br>2.30                 | 1.00<br>1.48                 |

| Variable                                                    | Category                                  | E-value for Estimate | E-value for 95% CI |
|-------------------------------------------------------------|-------------------------------------------|----------------------|--------------------|
|                                                             | 1953-1963 (current age: 60-69 years)      | 1.97                 | 1.58               |
|                                                             | 1963-1973 (current age: 50-59 years)      | 1.79                 | 1.53               |
|                                                             | 1973-1983 (current age: 40-49 years)      | 1.60                 | 1.39               |
|                                                             | 1983-1993 (current age: 30-39 years)      | 1.37                 | 1.16               |
|                                                             | 1993-1998 (current age: 25-29 years)      | 1.07                 | 1.00               |
| Religion when twelve years old                              | (Ref: Islam)                              |                      |                    |
|                                                             | Christianity                              | 1.29                 | 1.00               |
|                                                             | Collapsed affiliations with prevalence<3% | 1.34                 | 1.00               |
| Race plurality (prominent race/ethnic group [0] or not [1]) | (Ref: Plurality group)                    |                      |                    |
|                                                             | Non-plurality groups                      | 1.35                 | 1.20               |

**Table S10a. Israel: Demographic descriptive statistics**

| <b>Characteristic</b>                    | <b>N = 2,476<sup>1</sup></b> |
|------------------------------------------|------------------------------|
| <b>Age group</b>                         |                              |
| 1943 or earlier (current age: 80+ years) | 59 (2.4%)                    |
| 1943-1953 (current age: 70-79 years)     | 233 (9.4%)                   |
| 1953-1963 (current age: 60-69 years)     | 310 (13%)                    |
| 1963-1973 (current age: 50-59 years)     | 331 (13%)                    |
| 1973-1983 (current age: 40-49 years)     | 415 (17%)                    |
| 1983-1993 (current age: 30-39 years)     | 442 (18%)                    |
| 1993-1998 (current age: 25-29 years)     | 271 (11%)                    |
| 1998-2005 (current age: 18-24 years)     | 415 (17%)                    |
| (Missing)                                | 0 (0%)                       |
| <b>Gender</b>                            |                              |
| 1. Male                                  | 1,205 (49%)                  |
| 2. Female                                | 1,270 (51%)                  |
| 3. Other                                 | 0 (0%)                       |
| (Missing)                                | 0 (<0.1%)                    |
| <b>Marital status</b>                    |                              |
| 1. Single/Never been married             | 606 (24%)                    |
| 2. Married                               | 1,331 (54%)                  |
| 3. Separated                             | 24 (1.0%)                    |
| 4. Divorced                              | 194 (7.8%)                   |
| 5. Widowed                               | 153 (6.2%)                   |
| 6. Domestic partner                      | 123 (5.0%)                   |
| (Missing)                                | 45 (1.8%)                    |
| <b>Employment</b>                        |                              |
| 1. Employed for an employer              | 1,186 (48%)                  |
| 2. Self-employed                         | 262 (11%)                    |
| 3. Retired                               | 406 (16%)                    |
| 4. Student                               | 275 (11%)                    |
| 5. Homemaker                             | 166 (6.7%)                   |
| 6. Unemployed and looking for a job      | 98 (3.9%)                    |
| 7. None of these/Other                   | 77 (3.1%)                    |
| (Missing)                                | 6 (0.3%)                     |
| <b>Religious service attendance</b>      |                              |
| 1. More than once a week                 | 490 (20%)                    |
| 2. Once a week                           | 349 (14%)                    |
| 3. One to three times a month            | 250 (10%)                    |
| 4. A few times a year                    | 614 (25%)                    |
| 5. Never                                 | 768 (31%)                    |
| (Missing)                                | 6 (0.2%)                     |
| <b>Education</b>                         |                              |
| 1. Up to 8                               | 161 (6.5%)                   |
| 2. 9-15                                  | 1,072 (43%)                  |
| 3. 16+                                   | 1,241 (50%)                  |
| (Missing)                                | 2 (<0.1%)                    |
| <b>Immigration</b>                       |                              |
| 1. Born in this country                  | 1,915 (77%)                  |
| 2. Born in another country               | 556 (22%)                    |

| <b>Characteristic</b>                                       | <b>N = 2,476<sup>1</sup></b> |
|-------------------------------------------------------------|------------------------------|
| (Missing)                                                   | 5 (0.2%)                     |
| <b>Religious affiliation</b>                                |                              |
| 1. Christianity                                             | 29 (1.2%)                    |
| 10. Taoism                                                  | 0 (0%)                       |
| 11. Confucianism                                            | 0 (0%)                       |
| 12. Primal, Animist, or Folk religion                       | 0 (0%)                       |
| 13. Spiritism                                               | 0 (0%)                       |
| 14. Umbanda, Candomblé, and other African-derived religions | 0 (0%)                       |
| 15. Chinese folk/traditional religion                       | 0 (0%)                       |
| 2. Islam                                                    | 451 (18%)                    |
| 3. Hinduism                                                 | 0 (0%)                       |
| 4. Buddhism                                                 | 0 (0%)                       |
| 5. Judaism                                                  | 1,946 (79%)                  |
| 6. Sikhism                                                  | 0 (0%)                       |
| 7. Baha'i                                                   | 2 (<0.1%)                    |
| 8. Jainism                                                  | 0 (0%)                       |
| 9. Shinto                                                   | 0 (0%)                       |
| 96. Some other religion                                     | 3 (0.1%)                     |
| 97. No religion/Atheist/Agnostic                            | 43 (1.7%)                    |
| (Missing)                                                   | 3 (0.1%)                     |
| <b>RACE ETHNICITY</b>                                       |                              |
| (Missing)                                                   | 17 (0.7%)                    |
| 801. Israel: Jewish                                         | 1,961 (79%)                  |
| 802. Israel: Arab                                           | 475 (19%)                    |
| 9996. Other                                                 | 22 (0.9%)                    |

<sup>1</sup>n (%)

**Table S10b. Israel: Childhood descriptive statistics**

| <b>Characteristic</b>                      | <b>N = 2,476<sup>1</sup></b> |
|--------------------------------------------|------------------------------|
| <b>Age</b>                                 | 44 (18)                      |
| <b>Year of birth</b>                       |                              |
| 1943 or earlier (current age: 80+ years)   | 59 (2.4%)                    |
| 1943-1953 (current age: 70-79 years)       | 233 (9.4%)                   |
| 1953-1963 (current age: 60-69 years)       | 310 (13%)                    |
| 1963-1973 (current age: 50-59 years)       | 331 (13%)                    |
| 1973-1983 (current age: 40-49 years)       | 415 (17%)                    |
| 1983-1993 (current age: 30-39 years)       | 442 (18%)                    |
| 1993-1998 (current age: 25-29 years)       | 271 (11%)                    |
| 1998-2005 (current age: 18-24 years)       | 415 (17%)                    |
| (Missing)                                  | 0 (0%)                       |
| <b>Gender</b>                              |                              |
| 1. Male                                    | 1,205 (49%)                  |
| 2. Female                                  | 1,270 (51%)                  |
| 3. Other                                   | 0 (0%)                       |
| (Missing)                                  | 0 (<0.1%)                    |
| <b>Parent marital status</b>               |                              |
| 1. Parents were married                    | 2,166 (87%)                  |
| 2. Parents were divorced                   | 186 (7.5%)                   |
| 3. Parents were never married              | 18 (0.7%)                    |
| 4. One or both of them had died            | 77 (3.1%)                    |
| 5. Unsure                                  | 9 (0.4%)                     |
| (Missing)                                  | 19 (0.8%)                    |
| <b>Age 12 religious service attendance</b> |                              |
| 1. At least once a week                    | 588 (24%)                    |
| 2. One to three times a month              | 293 (12%)                    |
| 3. Less than once a month                  | 552 (22%)                    |
| 4. Never                                   | 1,031 (42%)                  |
| (Missing)                                  | 11 (0.5%)                    |
| <b>Relationship with mother</b>            |                              |
| 1. Very good                               | 1,835 (74%)                  |
| 2. Somewhat good                           | 512 (21%)                    |
| 3. Somewhat bad                            | 75 (3.0%)                    |
| 4. Very bad                                | 10 (0.4%)                    |
| 97. (Does not apply)                       | 33 (1.4%)                    |
| (Missing)                                  | 12 (0.5%)                    |
| <b>Relationship with father</b>            |                              |
| 1. Very good                               | 1,571 (63%)                  |
| 2. Somewhat good                           | 578 (23%)                    |
| 3. Somewhat bad                            | 172 (6.9%)                   |
| 4. Very bad                                | 19 (0.7%)                    |
| 97. (Does not apply)                       | 122 (4.9%)                   |
| (Missing)                                  | 14 (0.6%)                    |
| <b>Outsider growing up</b>                 |                              |
| 1. Yes                                     | 226 (9.1%)                   |
| 2. No                                      | 2,205 (89%)                  |
| (Missing)                                  | 45 (1.8%)                    |

| Characteristic                                              | N = 2,476 <sup>1</sup> |
|-------------------------------------------------------------|------------------------|
| <b>Abuse</b>                                                |                        |
| 1. Yes                                                      | 0 (0%)                 |
| 2. No                                                       | 0 (0%)                 |
| (Missing)                                                   | 2,476 (100%)           |
| <b>Self-rated health growing up</b>                         |                        |
| 1. Excellent                                                | 1,193 (48%)            |
| 2. Very good                                                | 884 (36%)              |
| 3. Good                                                     | 323 (13%)              |
| 4. Fair                                                     | 72 (2.9%)              |
| 5. Poor                                                     | 1 (<0.1%)              |
| (Missing)                                                   | 3 (0.1%)               |
| <b>Immigration status</b>                                   |                        |
| 1. Born in this country                                     | 1,915 (77%)            |
| 2. Born in another country                                  | 556 (22%)              |
| (Missing)                                                   | 5 (0.2%)               |
| <b>Subjective financial status of family growing up</b>     |                        |
| 1. Lived comfortably                                        | 599 (24%)              |
| 2. Got by                                                   | 1,255 (51%)            |
| 3. Found it difficult                                       | 454 (18%)              |
| 4. Found it very difficult                                  | 159 (6.4%)             |
| (Missing)                                                   | 9 (0.4%)               |
| <b>Religious affiliation</b>                                |                        |
| 1. Christianity                                             | 44 (1.8%)              |
| 10. Taoism                                                  | 0 (0%)                 |
| 11. Confucianism                                            | 0 (0%)                 |
| 12. Primal, Animist, or Folk religion                       | 0 (0%)                 |
| 13. Spiritism                                               | 0 (0%)                 |
| 14. Umbanda, Candomblé, and other African-derived religions | 0 (0%)                 |
| 15. Chinese folk/traditional religion                       | 0 (0%)                 |
| 2. Islam                                                    | 445 (18%)              |
| 3. Hinduism                                                 | 0 (0%)                 |
| 4. Buddhism                                                 | 0 (0%)                 |
| 5. Judaism                                                  | 1,933 (78%)            |
| 6. Sikhism                                                  | 0 (0%)                 |
| 7. Baha'i                                                   | 1 (<0.1%)              |
| 8. Jainism                                                  | 0 (0%)                 |
| 9. Shinto                                                   | 0 (0%)                 |
| 96. Some other religion                                     | 3 (0.1%)               |
| 97. No religion/Atheist/Agnostic                            | 45 (1.8%)              |
| (Missing)                                                   | 5 (0.2%)               |
| <b>Race/Ethnicity</b>                                       |                        |
| (Missing)                                                   | 17 (0.7%)              |
| 801. Israel: Jewish                                         | 1,961 (79%)            |
| 802. Israel: Arab                                           | 475 (19%)              |
| 9996. Other                                                 | 22 (0.9%)              |

<sup>1</sup>Mean (SD); n (%)

**Table S10c. Israel: Proportions by demographic category**

| Variable                     | Category                                 | Proportion | 95% CI         | SE    | p-value  |
|------------------------------|------------------------------------------|------------|----------------|-------|----------|
| Age group                    | 1998-2005 (current age: 18-24 years)     | 0.899      | (0.849, 0.950) | 0.026 | 1.02e-01 |
|                              | 1943 or earlier (current age: 80+ years) | 0.801      | (0.670, 0.932) | 0.065 |          |
|                              | 1943-1953 (current age: 70-79 years)     | 0.775      | (0.698, 0.852) | 0.039 |          |
|                              | 1953-1963 (current age: 60-69 years)     | 0.812      | (0.741, 0.882) | 0.036 |          |
|                              | 1963-1973 (current age: 50-59 years)     | 0.859      | (0.806, 0.912) | 0.027 |          |
|                              | 1973-1983 (current age: 40-49 years)     | 0.847      | (0.805, 0.889) | 0.021 |          |
|                              | 1983-1993 (current age: 30-39 years)     | 0.837      | (0.792, 0.883) | 0.023 |          |
|                              | 1993-1998 (current age: 25-29 years)     | 0.889      | (0.832, 0.945) | 0.029 |          |
|                              | Male                                     | 0.827      | (0.794, 0.860) | 0.017 |          |
|                              | Female                                   | 0.868      | (0.832, 0.904) | 0.018 |          |
| Gender                       | Other                                    | *          | *              | *     | 3.80e-02 |
| Marital status               | Single/Never been married                | 0.896      | (0.856, 0.937) | 0.021 | 2.85e-03 |
|                              | Divorced                                 | 0.886      | (0.827, 0.944) | 0.030 |          |
|                              | Domestic partner                         | 0.880      | (0.785, 0.975) | 0.048 |          |
|                              | Married                                  | 0.828      | (0.792, 0.864) | 0.018 |          |
|                              | Separated                                | 0.828      | (0.662, 0.994) | 0.077 |          |
|                              | Widowed                                  | 0.763      | (0.658, 0.868) | 0.053 |          |
|                              | Employed for an employer                 | 0.867      | (0.837, 0.897) | 0.015 | 8.04e-05 |
| Employment                   | Homemaker                                | 0.709      | (0.569, 0.850) | 0.071 |          |
|                              | None of these/Other                      | 0.762      | (0.626, 0.897) | 0.068 |          |
|                              | Retired                                  | 0.823      | (0.763, 0.884) | 0.031 |          |
|                              | Self-employed                            | 0.841      | (0.778, 0.903) | 0.032 |          |
|                              | Student                                  | 0.948      | (0.914, 0.982) | 0.017 |          |
|                              | Unemployed and looking for a job         | 0.760      | (0.605, 0.915) | 0.078 |          |
| Religious service attendance | Never                                    | 0.818      | (0.780, 0.856) | 0.019 | 4.47e-03 |
|                              | A few times a year                       | 0.871      | (0.830, 0.913) | 0.021 |          |
|                              | More than once a week                    | 0.889      | (0.852, 0.926) | 0.019 |          |
|                              | Once a week                              | 0.818      | (0.750, 0.885) | 0.034 |          |
|                              | One to three times                       | 0.845      | (0.784, 0.905) | 0.031 |          |

| Variable              | Category            | Proportion     | 95% CI         | SE    | p-value  |
|-----------------------|---------------------|----------------|----------------|-------|----------|
| Education             | a month             |                |                |       |          |
|                       | 9-15                | 0.822          | (0.781, 0.864) | 0.021 | 2.49e-04 |
|                       | 16+                 | 0.896          | (0.872, 0.920) | 0.012 |          |
| Immigration status    | Up to 8             | 0.650          | (0.484, 0.816) | 0.084 |          |
|                       | Born in this        |                |                |       |          |
|                       | country             | 0.853          | (0.821, 0.886) | 0.017 | 3.63e-01 |
|                       | Born in another     |                |                |       |          |
| Religious affiliation | country             | 0.830          | (0.783, 0.877) | 0.024 |          |
|                       | No                  |                |                |       |          |
|                       | religion/Atheist/Ag |                |                |       |          |
|                       | nostic              | *              | *              | *     | 1.16e-04 |
|                       | Christianity        | *              | *              | *     |          |
|                       | Combined            | 0.799          | (0.659, 0.939) | 0.070 |          |
|                       | Spiritism           | *              | *              | *     |          |
|                       | Umbanda,            |                |                |       |          |
|                       | Candomblé, and      |                |                |       |          |
|                       | other African-      |                |                |       |          |
|                       | derived religions   | *              | *              | *     |          |
|                       | Buddhism            | *              | *              | *     |          |
|                       | Islam               | 0.672          | (0.575, 0.769) | 0.049 |          |
|                       | Chinese             |                |                |       |          |
|                       | folk/traditional    |                |                |       |          |
|                       | religion            | *              | *              | *     |          |
| Hinduism              | *                   | *              | *              |       |          |
| Judaism               | 0.891               | (0.865, 0.916) | 0.013          |       |          |
| Primal, Animist, or   |                     |                |                |       |          |
| Folk religion         | *                   | *              | *              |       |          |

**Table S10d. Israel: Childhood predictors regression analysis**

| Variable                                                        | Category                     | Risk-Ratio | logRR SE | RR 95% CI   | Global p-value |
|-----------------------------------------------------------------|------------------------------|------------|----------|-------------|----------------|
| Relationship with your mother growing up                        | (Ref: Very bad/somewhat bad) |            |          |             | 0.591          |
|                                                                 | Very good/somewhat good      | 0.993      | 0.043    | (0.91,1.08) |                |
| Relationship with your father growing up                        | (Ref: Very bad/somewhat bad) |            |          |             | 0.550          |
|                                                                 | Very good/somewhat good      | 1.016      | 0.042    | (0.94,1.10) |                |
| Parents married to each other when you were around 12 years old | (Ref: Parents married)       |            |          |             | 0.197          |
|                                                                 | One or both of them had died | 1.070      | 0.053    | (0.96,1.19) |                |
|                                                                 | Parents were divorced        | 0.993      | 0.045    | (0.91,1.09) |                |
|                                                                 | Parents were never married   | 0.832      | 0.118    | (0.66,1.05) |                |
|                                                                 | Unsure                       | 0.692      | 0.196    | (0.47,1.02) |                |
| Feelings about familys household income when growing up         | (Ref: Got by)                |            |          |             | 0.158          |
|                                                                 | Found it difficult           | 0.997      | 0.027    | (0.95,1.05) |                |
|                                                                 | Found it very difficult      | 0.914      | 0.044    | (0.84,1.00) |                |
|                                                                 | Lived comfortably            | 1.005      | 0.019    | (0.97,1.04) |                |
| Felt like an outsider in your family when growing up            | (Ref: No)                    |            |          |             | 0.439          |
|                                                                 | Yes                          | 1.025      | 0.031    | (0.96,1.09) |                |
| Your health when growing up                                     | (Ref: Good)                  |            |          |             | 0.291          |
|                                                                 | Excellent                    | 0.975      | 0.028    | (0.92,1.03) |                |
|                                                                 | Fair                         | 0.964      | 0.045    | (0.88,1.05) |                |
|                                                                 | Poor                         | 1.078      | 0.054    | (0.97,1.20) |                |
|                                                                 | Very good                    | 0.957      | 0.026    | (0.91,1.01) |                |
| Born in This country                                            | (Ref: Born in this country)  |            |          |             | 0.518          |
|                                                                 | Born in another country      | 0.986      | 0.028    | (0.93,1.04) |                |
| How Often You                                                   | (Ref: Never)                 |            |          |             | 0.501          |

| Variable                                                                   | Category                                  | Risk-Ratio | logRR SE | RR 95% CI   | Global p-value |
|----------------------------------------------------------------------------|-------------------------------------------|------------|----------|-------------|----------------|
| Attended Religious Services or Worshiped When You Were Around 12 Years Old | At least once a week                      | 1.031      | 0.028    | (0.98,1.09) | 0.026          |
|                                                                            | Less than once a month                    | 1.027      | 0.024    | (0.98,1.08) |                |
|                                                                            | One to three times a month                | 0.991      | 0.037    | (0.92,1.07) |                |
|                                                                            | (Ref: 1998-2005; current age: 18-24)      |            |          |             |                |
| Year of birth (age group)                                                  | 1943 or earlier (current age: 80+ years)  | 0.912      | 0.082    | (0.78,1.07) |                |
|                                                                            | 1943-1953 (current age: 70-79 years)      | 0.869      | 0.049    | (0.79,0.96) |                |
|                                                                            | 1953-1963 (current age: 60-69 years)      | 0.912      | 0.042    | (0.84,0.99) |                |
|                                                                            | 1963-1973 (current age: 50-59 years)      | 0.951      | 0.040    | (0.88,1.03) |                |
|                                                                            | 1973-1983 (current age: 40-49 years)      | 0.951      | 0.032    | (0.89,1.01) |                |
|                                                                            | 1983-1993 (current age: 30-39 years)      | 0.948      | 0.035    | (0.88,1.02) |                |
|                                                                            | 1993-1998 (current age: 25-29 years)      | 0.989      | 0.039    | (0.92,1.07) |                |
|                                                                            | (Ref: Judaism)                            |            |          |             |                |
| Religion when twelve years old                                             | Collapsed affiliations with prevalence<3% | 1.083      | 0.046    | (0.99,1.18) | 0.197          |
|                                                                            | Islam                                     | 0.970      | 0.068    | (0.85,1.11) |                |
| Race plurality (prominent race/ethnic group [0] or not [1])                | (Ref: Plurality group)                    |            |          |             | 1.42e-04       |
|                                                                            | Non-plurality groups                      | 0.825      | 0.051    | (0.75,0.91) |                |

**Table S10e. Israel: Sensitivity to unmeasured confounding of childhood predictors**

| Variable                                                                                 | Category                                                                                                                                                                                        | E-value for Estimate         | E-value for 95% CI           |
|------------------------------------------------------------------------------------------|-------------------------------------------------------------------------------------------------------------------------------------------------------------------------------------------------|------------------------------|------------------------------|
| Relationship with your mother growing up                                                 | (Ref: Very bad/somewhat bad)<br>Very good/somewhat good                                                                                                                                         | 1.09                         | 1.00                         |
| Relationship with your father growing up                                                 | (Ref: Very bad/somewhat bad)<br>Very good/somewhat good                                                                                                                                         | 1.14                         | 1.00                         |
| Parents married to each other when you were around 12 years old                          | (Ref: Parents married)<br>One or both of them had died<br>Parents were divorced<br>Parents were never married<br>Unsure                                                                         | 1.34<br>1.09<br>1.69<br>2.25 | 1.00<br>1.00<br>1.00<br>1.00 |
| Feelings about family household income when growing up                                   | (Ref: Got by)<br>Found it difficult<br>Found it very difficult<br>Lived comfortably                                                                                                             | 1.06<br>1.41<br>1.07         | 1.00<br>1.06<br>1.00         |
| Felt like an outsider in your family when growing up                                     | (Ref: No)<br>Yes                                                                                                                                                                                | 1.18                         | 1.00                         |
| Your health when growing up                                                              | (Ref: Good)<br>Excellent<br>Fair<br>Poor<br>Very good                                                                                                                                           | 1.19<br>1.23<br>1.37<br>1.26 | 1.00<br>1.00<br>1.00<br>1.00 |
| Born in This country                                                                     | (Ref: Born in this country)<br>Born in another country                                                                                                                                          | 1.14                         | 1.00                         |
| How Often You Attended Religious Services or Worshiped When You Were Around 12 Years Old | (Ref: Never)<br>At least once a week<br>Less than once a month<br>One to three times a month                                                                                                    | 1.21<br>1.19<br>1.10         | 1.00<br>1.00<br>1.00         |
| Year of birth (age group)                                                                | (Ref: 1998-2005; current age: 18-24)<br>1943 or earlier (current age: 80+ years)<br>1943-1953 (current age: 70-79 years)<br>1953-1963 (current age: 60-69 years)<br>1963-1973 (current age: 50- | 1.42<br>1.57<br>1.42<br>1.28 | 1.00<br>1.26<br>1.11<br>1.00 |

| Variable                                                    | Category                                  | E-value for Estimate | E-value for 95% CI |
|-------------------------------------------------------------|-------------------------------------------|----------------------|--------------------|
|                                                             | 59 years)                                 |                      |                    |
|                                                             | 1973-1983 (current age: 40-49 years)      | 1.28                 | 1.00               |
|                                                             | 1983-1993 (current age: 30-39 years)      | 1.30                 | 1.00               |
|                                                             | 1993-1998 (current age: 25-29 years)      | 1.12                 | 1.00               |
| Religion when twelve years old                              | (Ref: Judaism)                            |                      |                    |
|                                                             | Collapsed affiliations with prevalence<3% | 1.38                 | 1.00               |
|                                                             | Islam                                     | 1.21                 | 1.00               |
| Race plurality (prominent race/ethnic group [0] or not [1]) | (Ref: Plurality group)                    |                      |                    |
|                                                             | Non-plurality groups                      | 1.72                 | 1.43               |

**Table S11a. Japan: Demographic descriptive statistics**

| <b>Characteristic</b>                    | <b>N = 13,886<sup>1</sup></b> |
|------------------------------------------|-------------------------------|
| <b>Age group</b>                         |                               |
| 1943 or earlier (current age: 80+ years) | 302 (2.2%)                    |
| 1943-1953 (current age: 70-79 years)     | 2,394 (17%)                   |
| 1953-1963 (current age: 60-69 years)     | 2,734 (20%)                   |
| 1963-1973 (current age: 50-59 years)     | 2,513 (18%)                   |
| 1973-1983 (current age: 40-49 years)     | 2,363 (17%)                   |
| 1983-1993 (current age: 30-39 years)     | 1,959 (14%)                   |
| 1993-1998 (current age: 25-29 years)     | 527 (3.8%)                    |
| 1998-2005 (current age: 18-24 years)     | 1,094 (7.9%)                  |
| (Missing)                                | 0 (0%)                        |
| <b>Gender</b>                            |                               |
| 1. Male                                  | 6,536 (47%)                   |
| 2. Female                                | 7,301 (53%)                   |
| 3. Other                                 | 16 (0.1%)                     |
| (Missing)                                | 33 (0.2%)                     |
| <b>Marital status</b>                    |                               |
| 1. Single/Never been married             | 3,324 (24%)                   |
| 2. Married                               | 8,079 (58%)                   |
| 3. Separated                             | 114 (0.8%)                    |
| 4. Divorced                              | 1,475 (11%)                   |
| 5. Widowed                               | 770 (5.5%)                    |
| 6. Domestic partner                      | 79 (0.6%)                     |
| (Missing)                                | 44 (0.3%)                     |
| <b>Employment</b>                        |                               |
| 1. Employed for an employer              | 7,478 (54%)                   |
| 2. Self-employed                         | 1,165 (8.4%)                  |
| 3. Retired                               | 1,718 (12%)                   |
| 4. Student                               | 351 (2.5%)                    |
| 5. Homemaker                             | 803 (5.8%)                    |
| 6. Unemployed and looking for a job      | 408 (2.9%)                    |
| 7. None of these/Other                   | 1,945 (14%)                   |
| (Missing)                                | 19 (0.1%)                     |
| <b>Religious service attendance</b>      |                               |
| 1. More than once a week                 | 201 (1.4%)                    |
| 2. Once a week                           | 199 (1.4%)                    |
| 3. One to three times a month            | 513 (3.7%)                    |
| 4. A few times a year                    | 2,083 (15%)                   |
| 5. Never                                 | 10,813 (78%)                  |
| (Missing)                                | 77 (0.6%)                     |
| <b>Education</b>                         |                               |
| 1. Up to 8                               | 371 (2.7%)                    |
| 2. 9-15                                  | 10,167 (73%)                  |
| 3. 16+                                   | 3,347 (24%)                   |
| (Missing)                                | 0 (0%)                        |
| <b>Immigration</b>                       |                               |
| 1. Born in this country                  | 13,317 (96%)                  |
| 2. Born in another country               | 89 (0.6%)                     |

| <b>Characteristic</b>                                       | <b>N = 13,886<sup>1</sup></b> |
|-------------------------------------------------------------|-------------------------------|
| (Missing)                                                   | 481 (3.5%)                    |
| <b>Religious affiliation</b>                                |                               |
| 1. Christianity                                             | 248 (1.8%)                    |
| 10. Taoism                                                  | 4 (<0.1%)                     |
| 11. Confucianism                                            | 10 (<0.1%)                    |
| 12. Primal, Animist, or Folk religion                       | 8 (<0.1%)                     |
| 13. Spiritism                                               | 0 (0%)                        |
| 14. Umbanda, Candomblé, and other African-derived religions | 0 (0%)                        |
| 15. Chinese folk/traditional religion                       | 0 (0%)                        |
| 2. Islam                                                    | 2 (<0.1%)                     |
| 3. Hinduism                                                 | 3 (<0.1%)                     |
| 4. Buddhism                                                 | 4,530 (33%)                   |
| 5. Judaism                                                  | 0 (<0.1%)                     |
| 6. Sikhism                                                  | 5 (<0.1%)                     |
| 7. Baha'i                                                   | 0 (0%)                        |
| 8. Jainism                                                  | 3 (<0.1%)                     |
| 9. Shinto                                                   | 298 (2.1%)                    |
| 96. Some other religion                                     | 29 (0.2%)                     |
| 97. No religion/Atheist/Agnostic                            | 8,496 (61%)                   |
| (Missing)                                                   | 251 (1.8%)                    |

<sup>1</sup>n (%)

**Table S11b. Japan: Childhood descriptive statistics**

| <b>Characteristic</b>                      | <b>N = 13,886<sup>1</sup></b> |
|--------------------------------------------|-------------------------------|
| <b>Age</b>                                 | 52 (17)                       |
| <b>Year of birth</b>                       |                               |
| 1943 or earlier (current age: 80+ years)   | 302 (2.2%)                    |
| 1943-1953 (current age: 70-79 years)       | 2,394 (17%)                   |
| 1953-1963 (current age: 60-69 years)       | 2,734 (20%)                   |
| 1963-1973 (current age: 50-59 years)       | 2,513 (18%)                   |
| 1973-1983 (current age: 40-49 years)       | 2,363 (17%)                   |
| 1983-1993 (current age: 30-39 years)       | 1,959 (14%)                   |
| 1993-1998 (current age: 25-29 years)       | 527 (3.8%)                    |
| 1998-2005 (current age: 18-24 years)       | 1,094 (7.9%)                  |
| (Missing)                                  | 0 (0%)                        |
| <b>Gender</b>                              |                               |
| 1. Male                                    | 6,536 (47%)                   |
| 2. Female                                  | 7,301 (53%)                   |
| 3. Other                                   | 16 (0.1%)                     |
| (Missing)                                  | 33 (0.2%)                     |
| <b>Parent marital status</b>               |                               |
| 1. Parents were married                    | 12,053 (87%)                  |
| 2. Parents were divorced                   | 752 (5.4%)                    |
| 3. Parents were never married              | 385 (2.8%)                    |
| 4. One or both of them had died            | 484 (3.5%)                    |
| 5. Unsure                                  | 189 (1.4%)                    |
| (Missing)                                  | 23 (0.2%)                     |
| <b>Age 12 religious service attendance</b> |                               |
| 1. At least once a week                    | 263 (1.9%)                    |
| 2. One to three times a month              | 550 (4.0%)                    |
| 3. Less than once a month                  | 3,367 (24%)                   |
| 4. Never                                   | 9,640 (69%)                   |
| (Missing)                                  | 66 (0.5%)                     |
| <b>Relationship with mother</b>            |                               |
| 1. Very good                               | 3,809 (27%)                   |
| 2. Somewhat good                           | 6,437 (46%)                   |
| 3. Somewhat bad                            | 1,819 (13%)                   |
| 4. Very bad                                | 535 (3.9%)                    |
| 97. (Does not apply)                       | 1,246 (9.0%)                  |
| (Missing)                                  | 41 (0.3%)                     |
| <b>Relationship with father</b>            |                               |
| 1. Very good                               | 2,797 (20%)                   |
| 2. Somewhat good                           | 6,157 (44%)                   |
| 3. Somewhat bad                            | 2,313 (17%)                   |
| 4. Very bad                                | 875 (6.3%)                    |
| 97. (Does not apply)                       | 1,705 (12%)                   |
| (Missing)                                  | 39 (0.3%)                     |
| <b>Outsider growing up</b>                 |                               |
| 1. Yes                                     | 1,294 (9.3%)                  |
| 2. No                                      | 11,635 (84%)                  |
| (Missing)                                  | 957 (6.9%)                    |

| Characteristic                                              | N = 13,886 <sup>1</sup> |
|-------------------------------------------------------------|-------------------------|
| <b>Abuse</b>                                                |                         |
| 1. Yes                                                      | 974 (7.0%)              |
| 2. No                                                       | 12,852 (93%)            |
| (Missing)                                                   | 60 (0.4%)               |
| <b>Self-rated health growing up</b>                         |                         |
| 1. Excellent                                                | 1,810 (13%)             |
| 2. Very good                                                | 4,817 (35%)             |
| 3. Good                                                     | 4,552 (33%)             |
| 4. Fair                                                     | 2,162 (16%)             |
| 5. Poor                                                     | 493 (3.6%)              |
| (Missing)                                                   | 52 (0.4%)               |
| <b>Immigration status</b>                                   |                         |
| 1. Born in this country                                     | 13,317 (96%)            |
| 2. Born in another country                                  | 89 (0.6%)               |
| (Missing)                                                   | 481 (3.5%)              |
| <b>Subjective financial status of family growing up</b>     |                         |
| 1. Lived comfortably                                        | 5,548 (40%)             |
| 2. Got by                                                   | 5,978 (43%)             |
| 3. Found it difficult                                       | 1,638 (12%)             |
| 4. Found it very difficult                                  | 684 (4.9%)              |
| (Missing)                                                   | 37 (0.3%)               |
| <b>Religious affiliation</b>                                |                         |
| 1. Christianity                                             | 221 (1.6%)              |
| 10. Taoism                                                  | 6 (<0.1%)               |
| 11. Confucianism                                            | 16 (0.1%)               |
| 12. Primal, Animist, or Folk religion                       | 4 (<0.1%)               |
| 13. Spiritism                                               | 0 (0%)                  |
| 14. Umbanda, Candomblé, and other African-derived religions | 0 (0%)                  |
| 15. Chinese folk/traditional religion                       | 0 (0%)                  |
| 2. Islam                                                    | 0 (0%)                  |
| 3. Hinduism                                                 | 5 (<0.1%)               |
| 4. Buddhism                                                 | 4,421 (32%)             |
| 5. Judaism                                                  | 0 (0%)                  |
| 6. Sikhism                                                  | 0 (0%)                  |
| 7. Baha'i                                                   | 4 (<0.1%)               |
| 8. Jainism                                                  | 1 (<0.1%)               |
| 9. Shinto                                                   | 238 (1.7%)              |
| 96. Some other religion                                     | 28 (0.2%)               |
| 97. No religion/Atheist/Agnostic                            | 8,817 (63%)             |
| (Missing)                                                   | 126 (0.9%)              |

<sup>1</sup>Mean (SD); n (%)

**Table S11c. Japan: Proportions by demographic category**

| Variable       | Category                                 | Proportion | 95% CI         | SE    | p-value  |
|----------------|------------------------------------------|------------|----------------|-------|----------|
| Age group      | 1998-2005 (current age: 18-24 years)     | 0.440      | (0.392, 0.489) | 0.025 | < 1e-16  |
|                | 1943 or earlier (current age: 80+ years) | 0.636      | (0.576, 0.695) | 0.030 |          |
|                | 1943-1953 (current age: 70-79 years)     | 0.586      | (0.564, 0.607) | 0.011 |          |
|                | 1953-1963 (current age: 60-69 years)     | 0.498      | (0.477, 0.519) | 0.011 |          |
|                | 1963-1973 (current age: 50-59 years)     | 0.405      | (0.384, 0.427) | 0.011 |          |
|                | 1973-1983 (current age: 40-49 years)     | 0.379      | (0.354, 0.404) | 0.013 |          |
|                | 1983-1993 (current age: 30-39 years)     | 0.334      | (0.304, 0.363) | 0.015 |          |
|                | 1993-1998 (current age: 25-29 years)     | 0.317      | (0.261, 0.373) | 0.028 |          |
|                | Male                                     | 0.378      | (0.364, 0.392) | 0.007 |          |
|                | Female                                   | 0.505      | (0.490, 0.519) | 0.007 |          |
| Gender         | Other                                    | 0.365      | (0.046, 0.683) | 0.144 | 2.68e-10 |
| Marital status | Single/Never been married                | 0.409      | (0.388, 0.429) | 0.010 |          |
|                | Divorced                                 | 0.466      | (0.431, 0.501) | 0.018 |          |
|                | Domestic partner                         | 0.545      | (0.393, 0.697) | 0.076 |          |
|                | Married                                  | 0.440      | (0.427, 0.453) | 0.007 |          |
|                | Separated                                | 0.464      | (0.341, 0.587) | 0.062 |          |
|                | Widowed                                  | 0.593      | (0.545, 0.641) | 0.024 |          |
|                | Employed for an employer                 | 0.388      | (0.373, 0.403) | 0.008 |          |
| Employment     | Homemaker                                | 0.541      | (0.507, 0.575) | 0.017 |          |
|                | None of these/Other                      | 0.510      | (0.486, 0.533) | 0.012 |          |
|                | Retired                                  | 0.531      | (0.506, 0.556) | 0.013 |          |
|                | Self-employed                            | 0.531      | (0.496, 0.566) | 0.018 |          |
|                | Student                                  | 0.499      | (0.414, 0.584) | 0.043 |          |
|                | Unemployed and looking for a job         | 0.325      | (0.279, 0.370) | 0.023 |          |
|                | Religious service attendance             |            |                |       |          |
|                | Never                                    | 0.416      | (0.405, 0.428) | 0.006 | < 1e-16  |
|                | A few times a year                       | 0.540      | (0.513, 0.567) | 0.014 |          |
|                | More than once a week                    | 0.688      | (0.616, 0.761) | 0.037 |          |
|                | Once a week                              | 0.699      | (0.615, 0.783) | 0.043 |          |
|                | One to three times a month               | 0.458      | (0.403, 0.513) | 0.028 |          |
| Education      | 9-15                                     | 0.416      | (0.405, 0.428) | 0.006 | < 1e-16  |
|                | 16+                                      | 0.544      | (0.522, 0.566) | 0.011 |          |

| Variable                 | Category                                                          | Proportion | 95% CI         | SE    | p-value  |
|--------------------------|-------------------------------------------------------------------|------------|----------------|-------|----------|
| Immigration status       | Up to 8<br>Born in this<br>country                                | 0.327      | (0.265, 0.388) | 0.031 | 6.94e-01 |
|                          | Born in another<br>country                                        | 0.445      | (0.434, 0.455) | 0.005 |          |
|                          | No<br>religion/Atheist/Ag<br>nostic                               | 0.421      | (0.274, 0.567) | 0.073 |          |
| Religious<br>affiliation | Christianity                                                      | 0.396      | (0.383, 0.409) | 0.007 | < 1e-16  |
|                          | Combined<br>Spiritism                                             | *          | *              | *     |          |
|                          | Umbanda,<br>Candomblé, and<br>other African-<br>derived religions | *          | *              | *     |          |
|                          | Buddhism                                                          | 0.509      | (0.492, 0.527) | 0.009 |          |
|                          | Islam                                                             | *          | *              | *     |          |
|                          | Chinese<br>folk/traditional<br>religion                           | *          | *              | *     |          |
|                          | Hinduism                                                          | *          | *              | *     |          |
|                          | Judaism                                                           | *          | *              | *     |          |
|                          | Primal, Animist, or<br>Folk religion                              | *          | *              | *     |          |
|                          |                                                                   |            |                |       |          |
|                          |                                                                   |            |                |       |          |
|                          |                                                                   |            |                |       |          |

**Table S11d. Japan: Childhood predictors regression analysis**

| Variable                                                        | Category                                                                                                                | Risk-Ratio                       | logRR SE                         | RR 95% CI                                                | Global p-value |
|-----------------------------------------------------------------|-------------------------------------------------------------------------------------------------------------------------|----------------------------------|----------------------------------|----------------------------------------------------------|----------------|
| Relationship with your mother growing up                        | (Ref: Very bad/somewhat bad)<br>Very good/somewhat good                                                                 | 1.057                            | 0.015                            | (1.03,1.09)                                              | 2.40e-04       |
| Relationship with your father growing up                        | (Ref: Very bad/somewhat bad)<br>Very good/somewhat good                                                                 | 1.018                            | 0.014                            | (0.99,1.05)                                              | 0.251          |
| Parents married to each other when you were around 12 years old | (Ref: Parents married)<br>One or both of them had died<br>Parents were divorced<br>Parents were never married<br>Unsure | 1.025<br>1.084<br>0.958<br>0.962 | 0.028<br>0.024<br>0.031<br>0.041 | (0.97,1.08)<br>(1.03,1.14)<br>(0.90,1.02)<br>(0.89,1.04) | 0.003          |
| Feelings about familys household income when growing up         | (Ref: Got by)<br>Found it difficult<br>Found it very difficult<br>Lived comfortably                                     | 0.954<br>0.948<br>1.072          | 0.016<br>0.025<br>0.012          | (0.92,0.98)<br>(0.90,1.00)<br>(1.05,1.10)                | 4.35e-09       |
| Physically or sexually abused when growing up                   | (Ref: No)                                                                                                               | 1.119                            | 0.022                            | (1.07,1.17)                                              | 2.45e-07       |
| Felt like an outsider in your family when growing up            | (Ref: No)<br>Yes                                                                                                        | 1.016                            | 0.019                            | (0.98,1.06)                                              | 0.429          |
| Your health when growing up                                     | (Ref: Good)<br>Excellent<br>Fair<br>Poor<br>Very good                                                                   | 1.048<br>1.020<br>1.000<br>1.038 | 0.018<br>0.015<br>0.027<br>0.012 | (1.01,1.09)<br>(0.99,1.05)<br>(0.95,1.05)<br>(1.01,1.06) | 0.009          |
| Born in This                                                    | (Ref: Born in this                                                                                                      |                                  |                                  |                                                          | 0.575          |

| Variable                                                                                  | Category                                  | Risk-Ratio | logRR SE | RR 95% CI   | Global p-value |
|-------------------------------------------------------------------------------------------|-------------------------------------------|------------|----------|-------------|----------------|
| country                                                                                   | country)                                  |            |          |             |                |
|                                                                                           | Born in another country                   | 0.983      | 0.069    | (0.86,1.13) |                |
| How Often You Attended Religious Services or Worshipped When You Were Around 12 Years Old | (Ref: Never)                              |            |          |             | 6.66e-16       |
|                                                                                           | At least once a week                      | 1.287      | 0.035    | (1.20,1.38) |                |
|                                                                                           | Less than once a month                    | 1.151      | 0.012    | (1.12,1.18) |                |
|                                                                                           | One to three times a month                | 1.203      | 0.027    | (1.14,1.27) |                |
| Year of birth (age group)                                                                 | (Ref: 1998-2005; current age: 18-24)      |            |          |             | 1.77e-06       |
|                                                                                           | 1943 or earlier (current age: 80+ years)  | 1.201      | 0.040    | (1.11,1.30) |                |
|                                                                                           | 1943-1953 (current age: 70-79 years)      | 1.148      | 0.027    | (1.09,1.21) |                |
|                                                                                           | 1953-1963 (current age: 60-69 years)      | 1.058      | 0.026    | (1.00,1.11) |                |
|                                                                                           | 1963-1973 (current age: 50-59 years)      | 0.974      | 0.027    | (0.92,1.03) |                |
|                                                                                           | 1973-1983 (current age: 40-49 years)      | 0.938      | 0.027    | (0.89,0.99) |                |
|                                                                                           | 1983-1993 (current age: 30-39 years)      | 0.908      | 0.028    | (0.86,0.96) |                |
|                                                                                           | 1993-1998 (current age: 25-29 years)      | 0.894      | 0.036    | (0.83,0.96) |                |
| Religion when twelve years old                                                            | (Ref: No religion/Atheist/Agnostic)       |            |          |             | 0.003          |
|                                                                                           | Buddhism                                  | 1.033      | 0.012    | (1.01,1.06) |                |
|                                                                                           | Collapsed affiliations with prevalence<3% | 1.092      | 0.029    | (1.03,1.16) |                |

**Table S11e. Japan: Sensitivity to unmeasured confounding of childhood predictors**

| Variable                                                                                  | Category                                                                                                                 | E-value for Estimate         | E-value for 95% CI           |
|-------------------------------------------------------------------------------------------|--------------------------------------------------------------------------------------------------------------------------|------------------------------|------------------------------|
| Relationship with your mother growing up                                                  | (Ref: Very bad/somewhat bad)<br>Very good/somewhat good                                                                  | 1.30                         | 1.19                         |
| Relationship with your father growing up                                                  | (Ref: Very bad/somewhat bad)<br>Very good/somewhat good                                                                  | 1.15                         | 1.00                         |
| Parents married to each other when you were around 12 years old                           | (Ref: Parents married)<br>One or both of them had died<br>Parents were divorced<br>Parents were never married<br>Unsure  | 1.19<br>1.38<br>1.26<br>1.24 | 1.00<br>1.22<br>1.00<br>1.00 |
| Feelings about family household income when growing up                                    | (Ref: Got by)<br>Found it difficult<br>Found it very difficult<br>Lived comfortably                                      | 1.27<br>1.29<br>1.35         | 1.14<br>1.07<br>1.27         |
| Physically or sexually abused when growing up                                             | (Ref: No)                                                                                                                | 1.48                         | 1.35                         |
| Felt like an outsider in your family when growing up                                      | (Ref: No)<br>Yes                                                                                                         | 1.14                         | 1.00                         |
| Your health when growing up                                                               | (Ref: Good)<br>Excellent<br>Fair<br>Poor<br>Very good                                                                    | 1.27<br>1.16<br>1.02<br>1.24 | 1.13<br>1.00<br>1.00<br>1.13 |
| Born in This country                                                                      | (Ref: Born in this country)<br>Born in another country                                                                   | 1.15                         | 1.00                         |
| How Often You Attended Religious Services or Worshipped When You Were Around 12 Years Old | (Ref: Never)<br>At least once a week<br>Less than once a month<br>One to three times a month                             | 1.89<br>1.57<br>1.70         | 1.69<br>1.49<br>1.54         |
| Year of birth (age group)                                                                 | (Ref: 1998-2005; current age: 18-24)<br>1943 or earlier (current age: 80+ years)<br>1943-1953 (current age: 70-79 years) | 1.69<br>1.56                 | 1.46<br>1.40                 |

| Variable                       | Category                                  | E-value for Estimate | E-value for 95% CI |
|--------------------------------|-------------------------------------------|----------------------|--------------------|
| Religion when twelve years old | 1953-1963 (current age: 60-69 years)      | 1.31                 | 1.07               |
|                                | 1963-1973 (current age: 50-59 years)      | 1.19                 | 1.00               |
|                                | 1973-1983 (current age: 40-49 years)      | 1.33                 | 1.12               |
|                                | 1983-1993 (current age: 30-39 years)      | 1.44                 | 1.26               |
|                                | 1993-1998 (current age: 25-29 years)      | 1.48                 | 1.26               |
|                                | (Ref: No religion/Atheist/Agnostic)       |                      |                    |
|                                | Buddhism                                  | 1.22                 | 1.11               |
|                                | Collapsed affiliations with prevalence<3% | 1.41                 | 1.21               |

**Table S12a. Kenya: Demographic descriptive statistics**

| <b>Characteristic</b>                    | <b>N = 9,115<sup>1</sup></b> |
|------------------------------------------|------------------------------|
| <b>Age group</b>                         |                              |
| 1943 or earlier (current age: 80+ years) | 42 (0.5%)                    |
| 1943-1953 (current age: 70-79 years)     | 253 (2.8%)                   |
| 1953-1963 (current age: 60-69 years)     | 564 (6.2%)                   |
| 1963-1973 (current age: 50-59 years)     | 820 (9.0%)                   |
| 1973-1983 (current age: 40-49 years)     | 1,313 (14%)                  |
| 1983-1993 (current age: 30-39 years)     | 1,908 (21%)                  |
| 1993-1998 (current age: 25-29 years)     | 1,503 (16%)                  |
| 1998-2005 (current age: 18-24 years)     | 2,709 (30%)                  |
| (Missing)                                | 5 (<0.1%)                    |
| <b>Gender</b>                            |                              |
| 1. Male                                  | 4,437 (49%)                  |
| 2. Female                                | 4,672 (51%)                  |
| 3. Other                                 | 0 (<0.1%)                    |
| (Missing)                                | 5 (<0.1%)                    |
| <b>Marital status</b>                    |                              |
| 1. Single/Never been married             | 3,034 (33%)                  |
| 2. Married                               | 5,150 (57%)                  |
| 3. Separated                             | 363 (4.0%)                   |
| 4. Divorced                              | 72 (0.8%)                    |
| 5. Widowed                               | 350 (3.8%)                   |
| 6. Domestic partner                      | 119 (1.3%)                   |
| (Missing)                                | 27 (0.3%)                    |
| <b>Employment</b>                        |                              |
| 1. Employed for an employer              | 1,093 (12%)                  |
| 2. Self-employed                         | 2,805 (31%)                  |
| 3. Retired                               | 223 (2.4%)                   |
| 4. Student                               | 1,072 (12%)                  |
| 5. Homemaker                             | 1,219 (13%)                  |
| 6. Unemployed and looking for a job      | 2,592 (28%)                  |
| 7. None of these/Other                   | 105 (1.2%)                   |
| (Missing)                                | 6 (<0.1%)                    |
| <b>Religious service attendance</b>      |                              |
| 1. More than once a week                 | 2,191 (24%)                  |
| 2. Once a week                           | 4,896 (54%)                  |
| 3. One to three times a month            | 999 (11%)                    |
| 4. A few times a year                    | 673 (7.4%)                   |
| 5. Never                                 | 345 (3.8%)                   |
| (Missing)                                | 11 (0.1%)                    |
| <b>Education</b>                         |                              |
| 1. Up to 8                               | 3,824 (42%)                  |
| 2. 9-15                                  | 4,700 (52%)                  |
| 3. 16+                                   | 585 (6.4%)                   |
| (Missing)                                | 5 (<0.1%)                    |
| <b>Immigration</b>                       |                              |
| 1. Born in this country                  | 9,025 (99%)                  |
| 2. Born in another country               | 88 (1.0%)                    |

| <b>Characteristic</b>                                       | <b>N = 9,115<sup>1</sup></b> |
|-------------------------------------------------------------|------------------------------|
| (Missing)                                                   | 2 (<0.1%)                    |
| <b>Religious affiliation</b>                                |                              |
| 1. Christianity                                             | 8,284 (91%)                  |
| 10. Taoism                                                  | 0 (0%)                       |
| 11. Confucianism                                            | 0 (0%)                       |
| 12. Primal, Animist, or Folk religion                       | 6 (<0.1%)                    |
| 13. Spiritism                                               | 0 (0%)                       |
| 14. Umbanda, Candomblé, and other African-derived religions | 0 (0%)                       |
| 15. Chinese folk/traditional religion                       | 0 (0%)                       |
| 2. Islam                                                    | 725 (8.0%)                   |
| 3. Hinduism                                                 | 0 (0%)                       |
| 4. Buddhism                                                 | 1 (<0.1%)                    |
| 5. Judaism                                                  | 4 (<0.1%)                    |
| 6. Sikhism                                                  | 0 (0%)                       |
| 7. Baha'i                                                   | 1 (<0.1%)                    |
| 8. Jainism                                                  | 0 (0%)                       |
| 9. Shinto                                                   | 0 (0%)                       |
| 96. Some other religion                                     | 5 (<0.1%)                    |
| 97. No religion/Atheist/Agnostic                            | 83 (0.9%)                    |
| (Missing)                                                   | 8 (<0.1%)                    |
| <b>RACE ETHNICITY</b>                                       |                              |
| (Missing)                                                   | 21 (0.2%)                    |
| 1001. Kenya: Luhya                                          | 1,535 (17%)                  |
| 1002. Kenya: Luo                                            | 935 (10%)                    |
| 1003. Kenya: Kalenjin                                       | 1,093 (12%)                  |
| 1004. Kenya: Kamba                                          | 1,027 (11%)                  |
| 1005. Kenya: Kikuyu                                         | 1,657 (18%)                  |
| 1006. Kenya: Kisii                                          | 604 (6.6%)                   |
| 1007. Kenya: Maasai                                         | 175 (1.9%)                   |
| 1008. Kenya: Meru                                           | 541 (5.9%)                   |
| 1009. Kenya: Kenyan Somali/Somali                           | 304 (3.3%)                   |
| 1010. Kenya: Miji Kenda tribes                              | 581 (6.4%)                   |
| 1011. Kenya: Embu                                           | 166 (1.8%)                   |
| 9996. Other                                                 | 476 (5.2%)                   |

<sup>1</sup>n (%)

**Table S12b. Kenya: Childhood descriptive statistics**

| <b>Characteristic</b>                      | <b>N = 9,115<sup>1</sup></b> |
|--------------------------------------------|------------------------------|
| <b>Age</b>                                 | 35 (15)                      |
| Unknown                                    | 5                            |
| <b>Year of birth</b>                       |                              |
| 1943 or earlier (current age: 80+ years)   | 42 (0.5%)                    |
| 1943-1953 (current age: 70-79 years)       | 253 (2.8%)                   |
| 1953-1963 (current age: 60-69 years)       | 564 (6.2%)                   |
| 1963-1973 (current age: 50-59 years)       | 820 (9.0%)                   |
| 1973-1983 (current age: 40-49 years)       | 1,313 (14%)                  |
| 1983-1993 (current age: 30-39 years)       | 1,908 (21%)                  |
| 1993-1998 (current age: 25-29 years)       | 1,503 (16%)                  |
| 1998-2005 (current age: 18-24 years)       | 2,709 (30%)                  |
| (Missing)                                  | 5 (<0.1%)                    |
| <b>Gender</b>                              |                              |
| 1. Male                                    | 4,437 (49%)                  |
| 2. Female                                  | 4,672 (51%)                  |
| 3. Other                                   | 0 (<0.1%)                    |
| (Missing)                                  | 5 (<0.1%)                    |
| <b>Parent marital status</b>               |                              |
| 1. Parents were married                    | 7,394 (81%)                  |
| 2. Parents were divorced                   | 567 (6.2%)                   |
| 3. Parents were never married              | 546 (6.0%)                   |
| 4. One or both of them had died            | 384 (4.2%)                   |
| 5. Unsure                                  | 74 (0.8%)                    |
| (Missing)                                  | 151 (1.7%)                   |
| <b>Age 12 religious service attendance</b> |                              |
| 1. At least once a week                    | 7,340 (81%)                  |
| 2. One to three times a month              | 1,324 (15%)                  |
| 3. Less than once a month                  | 215 (2.4%)                   |
| 4. Never                                   | 169 (1.9%)                   |
| (Missing)                                  | 68 (0.7%)                    |
| <b>Relationship with mother</b>            |                              |
| 1. Very good                               | 7,559 (83%)                  |
| 2. Somewhat good                           | 1,131 (12%)                  |
| 3. Somewhat bad                            | 110 (1.2%)                   |
| 4. Very bad                                | 90 (1.0%)                    |
| 97. (Does not apply)                       | 177 (1.9%)                   |
| (Missing)                                  | 49 (0.5%)                    |
| <b>Relationship with father</b>            |                              |
| 1. Very good                               | 6,370 (70%)                  |
| 2. Somewhat good                           | 1,525 (17%)                  |
| 3. Somewhat bad                            | 179 (2.0%)                   |
| 4. Very bad                                | 165 (1.8%)                   |
| 97. (Does not apply)                       | 765 (8.4%)                   |
| (Missing)                                  | 112 (1.2%)                   |
| <b>Outsider growing up</b>                 |                              |
| 1. Yes                                     | 972 (11%)                    |
| 2. No                                      | 8,100 (89%)                  |

| <b>Characteristic</b>                                       | <b>N = 9,115<sup>1</sup></b> |
|-------------------------------------------------------------|------------------------------|
| (Missing)                                                   | 43 (0.5%)                    |
| <b>Abuse</b>                                                |                              |
| 1. Yes                                                      | 1,028 (11%)                  |
| 2. No                                                       | 8,052 (88%)                  |
| (Missing)                                                   | 35 (0.4%)                    |
| <b>Self-rated health growing up</b>                         |                              |
| 1. Excellent                                                | 3,559 (39%)                  |
| 2. Very good                                                | 2,086 (23%)                  |
| 3. Good                                                     | 2,033 (22%)                  |
| 4. Fair                                                     | 1,119 (12%)                  |
| 5. Poor                                                     | 302 (3.3%)                   |
| (Missing)                                                   | 17 (0.2%)                    |
| <b>Immigration status</b>                                   |                              |
| 1. Born in this country                                     | 9,025 (99%)                  |
| 2. Born in another country                                  | 88 (1.0%)                    |
| (Missing)                                                   | 2 (<0.1%)                    |
| <b>Subjective financial status of family growing up</b>     |                              |
| 1. Lived comfortably                                        | 2,385 (26%)                  |
| 2. Got by                                                   | 2,619 (29%)                  |
| 3. Found it difficult                                       | 3,310 (36%)                  |
| 4. Found it very difficult                                  | 788 (8.6%)                   |
| (Missing)                                                   | 13 (0.1%)                    |
| <b>Religious affiliation</b>                                |                              |
| 1. Christianity                                             | 8,301 (91%)                  |
| 10. Taoism                                                  | 0 (0%)                       |
| 11. Confucianism                                            | 0 (0%)                       |
| 12. Primal, Animist, or Folk religion                       | 11 (0.1%)                    |
| 13. Spiritism                                               | 0 (0%)                       |
| 14. Umbanda, Candomblé, and other African-derived religions | 0 (0%)                       |
| 15. Chinese folk/traditional religion                       | 0 (0%)                       |
| 2. Islam                                                    | 730 (8.0%)                   |
| 3. Hinduism                                                 | 0 (0%)                       |
| 4. Buddhism                                                 | 5 (<0.1%)                    |
| 5. Judaism                                                  | 5 (<0.1%)                    |
| 6. Sikhism                                                  | 0 (<0.1%)                    |
| 7. Baha'i                                                   | 4 (<0.1%)                    |
| 8. Jainism                                                  | 0 (0%)                       |
| 9. Shinto                                                   | 0 (0%)                       |
| 96. Some other religion                                     | 1 (<0.1%)                    |
| 97. No religion/Atheist/Agnostic                            | 50 (0.6%)                    |
| (Missing)                                                   | 8 (<0.1%)                    |
| <b>Race/Ethnicity</b>                                       |                              |
| (Missing)                                                   | 21 (0.2%)                    |
| 1001. Kenya: Luhya                                          | 1,535 (17%)                  |
| 1002. Kenya: Luo                                            | 935 (10%)                    |
| 1003. Kenya: Kalenjin                                       | 1,093 (12%)                  |
| 1004. Kenya: Kamba                                          | 1,027 (11%)                  |

| <b>Characteristic</b>             | <b>N = 9,115<sup>1</sup></b> |
|-----------------------------------|------------------------------|
| 1005. Kenya: Kikuyu               | 1,657 (18%)                  |
| 1006. Kenya: Kisii                | 604 (6.6%)                   |
| 1007. Kenya: Maasai               | 175 (1.9%)                   |
| 1008. Kenya: Meru                 | 541 (5.9%)                   |
| 1009. Kenya: Kenyan Somali/Somali | 304 (3.3%)                   |
| 1010. Kenya: Miji Kenda tribes    | 581 (6.4%)                   |
| 1011. Kenya: Embu                 | 166 (1.8%)                   |
| 9996. Other                       | 476 (5.2%)                   |

<sup>1</sup>Mean (SD); n (%)

**Table S12c. Kenya: Proportions by demographic category**

| Variable                     | Category                                 | Proportion | 95% CI         | SE    | p-value  |
|------------------------------|------------------------------------------|------------|----------------|-------|----------|
| Age group                    | 1998-2005 (current age: 18-24 years)     | 0.813      | (0.793, 0.832) | 0.010 | 5.22e-11 |
|                              | 1943 or earlier (current age: 80+ years) | 0.459      | (0.212, 0.707) | 0.121 |          |
|                              | 1943-1953 (current age: 70-79 years)     | 0.686      | (0.593, 0.779) | 0.047 |          |
|                              | 1953-1963 (current age: 60-69 years)     | 0.658      | (0.596, 0.721) | 0.032 |          |
|                              | 1963-1973 (current age: 50-59 years)     | 0.668      | (0.615, 0.720) | 0.027 |          |
|                              | 1973-1983 (current age: 40-49 years)     | 0.707      | (0.672, 0.743) | 0.018 |          |
|                              | 1983-1993 (current age: 30-39 years)     | 0.753      | (0.728, 0.779) | 0.013 |          |
|                              | 1993-1998 (current age: 25-29 years)     | 0.788      | (0.764, 0.811) | 0.012 |          |
|                              | Male                                     | 0.785      | (0.765, 0.805) | 0.010 |          |
|                              | Female                                   | 0.723      | (0.703, 0.744) | 0.010 |          |
| Gender                       | Other                                    | 1.000      | *              | *     | < 1e-16  |
| Marital status               | Single/Never been married                | 0.813      | (0.794, 0.831) | 0.009 |          |
|                              | Divorced                                 | 0.719      | (0.599, 0.838) | 0.060 |          |
|                              | Domestic partner                         | 0.768      | (0.660, 0.877) | 0.055 |          |
|                              | Married                                  | 0.728      | (0.706, 0.750) | 0.011 |          |
|                              | Separated                                | 0.722      | (0.667, 0.777) | 0.028 |          |
|                              | Widowed                                  | 0.646      | (0.564, 0.728) | 0.042 |          |
|                              | Employed for an employer                 | 0.802      | (0.772, 0.831) | 0.015 |          |
| Employment                   | Homemaker                                | 0.646      | (0.605, 0.687) | 0.021 | 2.22e-16 |
|                              | None of these/Other                      | 0.730      | (0.620, 0.840) | 0.056 |          |
|                              | Retired                                  | 0.657      | (0.565, 0.750) | 0.047 |          |
|                              | Self-employed                            | 0.740      | (0.715, 0.766) | 0.013 |          |
|                              | Student                                  | 0.858      | (0.833, 0.884) | 0.013 |          |
|                              | Unemployed and looking for a job         | 0.763      | (0.741, 0.785) | 0.011 |          |
|                              | Religious service attendance             |            |                |       |          |
| Religious service attendance | Never                                    | 0.728      | (0.665, 0.791) | 0.032 | 4.20e-01 |
|                              | A few times a year                       | 0.777      | (0.736, 0.817) | 0.021 |          |
|                              | More than once a week                    | 0.734      | (0.701, 0.766) | 0.016 |          |
|                              | Once a week                              | 0.759      | (0.739, 0.780) | 0.010 |          |
|                              | One to three times a month               | 0.760      | (0.724, 0.796) | 0.018 |          |
| Education                    | 9-15                                     | 0.802      | (0.784, 0.819) | 0.009 | < 1e-16  |
|                              | 16+                                      | 0.879      | (0.848, 0.909) | 0.016 |          |

| Variable                 | Category                                                          | Proportion | 95% CI         | SE    | p-value  |
|--------------------------|-------------------------------------------------------------------|------------|----------------|-------|----------|
| Immigration status       | Up to 8<br>Born in this<br>country                                | 0.675      | (0.647, 0.703) | 0.014 | 8.31e-01 |
|                          | Born in another<br>country                                        | 0.753      | (0.736, 0.771) | 0.009 |          |
|                          | No<br>religion/Atheist/Ag<br>nostic                               | 0.742      | (0.634, 0.850) | 0.054 |          |
| Religious<br>affiliation | Christianity                                                      | *          | *              | *     | 1.75e-01 |
|                          | Combined                                                          | 0.758      | (0.740, 0.776) | 0.009 |          |
|                          | Spiritism                                                         | 0.755      | (0.667, 0.843) | 0.044 |          |
|                          | Umbanda,<br>Candomblé, and<br>other African-<br>derived religions | *          | *              | *     |          |
|                          | Buddhism                                                          | *          | *              | *     |          |
|                          | Islam                                                             | 0.698      | (0.637, 0.759) | 0.031 |          |
|                          | Chinese<br>folk/traditional<br>religion                           | *          | *              | *     |          |
|                          | Hinduism                                                          | *          | *              | *     |          |
|                          | Judaism                                                           | *          | *              | *     |          |
|                          | Primal, Animist, or<br>Folk religion                              | *          | *              | *     |          |

**Table S12d. Kenya: Childhood predictors regression analysis**

| Variable                                                        | Category                                                                                                                | Risk-Ratio                       | logRR SE                         | RR 95% CI                                                | Global p-value |
|-----------------------------------------------------------------|-------------------------------------------------------------------------------------------------------------------------|----------------------------------|----------------------------------|----------------------------------------------------------|----------------|
| Relationship with your mother growing up                        | (Ref: Very bad/somewhat bad)<br>Very good/somewhat good                                                                 | 1.071                            | 0.041                            | (0.99,1.16)                                              | 0.117          |
| Relationship with your father growing up                        | (Ref: Very bad/somewhat bad)<br>Very good/somewhat good                                                                 | 0.949                            | 0.025                            | (0.90,1.00)                                              | 0.045          |
| Parents married to each other when you were around 12 years old | (Ref: Parents married)<br>One or both of them had died<br>Parents were divorced<br>Parents were never married<br>Unsure | 1.046<br>1.004<br>1.004<br>1.117 | 0.028<br>0.023<br>0.019<br>0.042 | (0.99,1.10)<br>(0.96,1.05)<br>(0.97,1.04)<br>(1.03,1.21) | 0.038          |
| Feelings about familys household income when growing up         | (Ref: Got by)<br>Found it difficult<br>Found it very difficult<br>Lived comfortably                                     | 0.962<br>0.931<br>1.004          | 0.015<br>0.023<br>0.014          | (0.94,0.99)<br>(0.89,0.97)<br>(0.98,1.03)                | 0.004          |
| Physically or sexually abused when growing up                   | (Ref: No)                                                                                                               | 1.000                            | 0.019                            | (0.96,1.04)                                              | 0.613          |
| Felt like an outsider in your family when growing up            | (Ref: No)<br>Yes                                                                                                        | 0.971                            | 0.020                            | (0.93,1.01)                                              | 0.176          |
| Your health when growing up                                     | (Ref: Good)<br>Excellent<br>Fair<br>Poor<br>Very good                                                                   | 1.012<br>1.021<br>0.966<br>1.003 | 0.016<br>0.019<br>0.038<br>0.018 | (0.98,1.04)<br>(0.98,1.06)<br>(0.90,1.04)<br>(0.97,1.04) | 0.605          |
| Born in This                                                    | (Ref: Born in this                                                                                                      |                                  |                                  |                                                          | 0.570          |

| Variable                                                                                  | Category                                  | Risk-Ratio | logRR SE | RR 95% CI   | Global p-value |
|-------------------------------------------------------------------------------------------|-------------------------------------------|------------|----------|-------------|----------------|
| country                                                                                   | country)                                  |            |          |             |                |
|                                                                                           | Born in another country                   | 0.985      | 0.054    | (0.89,1.10) |                |
| How Often You Attended Religious Services or Worshipped When You Were Around 12 Years Old | (Ref: Never)                              |            |          |             | 0.644          |
|                                                                                           | At least once a week                      | 1.045      | 0.053    | (0.94,1.16) |                |
|                                                                                           | Less than once a month                    | 0.991      | 0.066    | (0.87,1.13) |                |
|                                                                                           | One to three times a month                | 1.041      | 0.055    | (0.94,1.16) |                |
| Year of birth (age group)                                                                 | (Ref: 1998-2005; current age: 18-24)      |            |          |             | 2.21e-06       |
|                                                                                           | 1943 or earlier (current age: 80+ years)  | 0.703      | 0.116    | (0.56,0.88) |                |
|                                                                                           | 1943-1953 (current age: 70-79 years)      | 0.886      | 0.048    | (0.81,0.97) |                |
|                                                                                           | 1953-1963 (current age: 60-69 years)      | 0.863      | 0.032    | (0.81,0.92) |                |
|                                                                                           | 1963-1973 (current age: 50-59 years)      | 0.874      | 0.027    | (0.83,0.92) |                |
|                                                                                           | 1973-1983 (current age: 40-49 years)      | 0.910      | 0.019    | (0.88,0.94) |                |
|                                                                                           | 1983-1993 (current age: 30-39 years)      | 0.948      | 0.014    | (0.92,0.97) |                |
|                                                                                           | 1993-1998 (current age: 25-29 years)      | 0.978      | 0.014    | (0.95,1.01) |                |
| Religion when twelve years old                                                            | (Ref: Christianity)                       |            |          |             | 0.029          |
|                                                                                           | Collapsed affiliations with prevalence<3% | 1.017      | 0.064    | (0.90,1.15) |                |
|                                                                                           | Islam                                     | 0.925      | 0.031    | (0.87,0.98) |                |
| Race plurality (prominent race/ethnic group [0] or not [1])                               | (Ref: Plurality group)                    |            |          |             | 0.612          |
|                                                                                           | Non-plurality groups                      | 1.000      | 0.023    | (0.95,1.05) |                |

**Table S12e. Kenya: Sensitivity to unmeasured confounding of childhood predictors**

| Variable                                                                                 | Category                                                                                                                 | E-value for Estimate         | E-value for 95% CI           |
|------------------------------------------------------------------------------------------|--------------------------------------------------------------------------------------------------------------------------|------------------------------|------------------------------|
| Relationship with your mother growing up                                                 | (Ref: Very bad/somewhat bad)<br>Very good/somewhat good                                                                  | 1.35                         | 1.00                         |
| Relationship with your father growing up                                                 | (Ref: Very bad/somewhat bad)<br>Very good/somewhat good                                                                  | 1.29                         | 1.05                         |
| Parents married to each other when you were around 12 years old                          | (Ref: Parents married)<br>One or both of them had died<br>Parents were divorced<br>Parents were never married<br>Unsure  | 1.26<br>1.06<br>1.06<br>1.48 | 1.00<br>1.00<br>1.00<br>1.20 |
| Feelings about family household income when growing up                                   | (Ref: Got by)<br>Found it difficult<br>Found it very difficult<br>Lived comfortably                                      | 1.24<br>1.36<br>1.06         | 1.11<br>1.19<br>1.00         |
| Physically or sexually abused when growing up                                            | (Ref: No)                                                                                                                | 1.01                         | 1.00                         |
| Felt like an outsider in your family when growing up                                     | (Ref: No)<br>Yes                                                                                                         | 1.21                         | 1.00                         |
| Your health when growing up                                                              | (Ref: Good)<br>Excellent<br>Fair<br>Poor<br>Very good                                                                    | 1.12<br>1.17<br>1.23<br>1.06 | 1.00<br>1.00<br>1.00<br>1.00 |
| Born in This country                                                                     | (Ref: Born in this country)<br>Born in another country                                                                   | 1.14                         | 1.00                         |
| How Often You Attended Religious Services or Worshiped When You Were Around 12 Years Old | (Ref: Never)<br>At least once a week<br>Less than once a month<br>One to three times a month                             | 1.26<br>1.10<br>1.25         | 1.00<br>1.00<br>1.00         |
| Year of birth (age group)                                                                | (Ref: 1998-2005; current age: 18-24)<br>1943 or earlier (current age: 80+ years)<br>1943-1953 (current age: 70-79 years) | 2.20<br>1.51                 | 1.52<br>1.19                 |

| Variable                                                    | Category                                  | E-value for Estimate | E-value for 95% CI |
|-------------------------------------------------------------|-------------------------------------------|----------------------|--------------------|
|                                                             | 1953-1963 (current age: 60-69 years)      | 1.59                 | 1.40               |
|                                                             | 1963-1973 (current age: 50-59 years)      | 1.55                 | 1.39               |
|                                                             | 1973-1983 (current age: 40-49 years)      | 1.43                 | 1.31               |
|                                                             | 1983-1993 (current age: 30-39 years)      | 1.29                 | 1.19               |
|                                                             | 1993-1998 (current age: 25-29 years)      | 1.18                 | 1.00               |
| Religion when twelve years old                              | (Ref: Christianity)                       |                      |                    |
|                                                             | Collapsed affiliations with prevalence<3% | 1.15                 | 1.00               |
|                                                             | Islam                                     | 1.38                 | 1.15               |
| Race plurality (prominent race/ethnic group [0] or not [1]) | (Ref: Plurality group)                    |                      |                    |
|                                                             | Non-plurality groups                      | 1.02                 | 1.00               |

**Table S13a. Mexico: Demographic descriptive statistics**

| <b>Characteristic</b>                    | <b>N = 2,126<sup>1</sup></b> |
|------------------------------------------|------------------------------|
| <b>Age group</b>                         |                              |
| 1943 or earlier (current age: 80+ years) | 26 (1.2%)                    |
| 1943-1953 (current age: 70-79 years)     | 98 (4.6%)                    |
| 1953-1963 (current age: 60-69 years)     | 214 (10%)                    |
| 1963-1973 (current age: 50-59 years)     | 325 (15%)                    |
| 1973-1983 (current age: 40-49 years)     | 351 (17%)                    |
| 1983-1993 (current age: 30-39 years)     | 483 (23%)                    |
| 1993-1998 (current age: 25-29 years)     | 219 (10%)                    |
| 1998-2005 (current age: 18-24 years)     | 410 (19%)                    |
| (Missing)                                | 0 (0%)                       |
| <b>Gender</b>                            |                              |
| 1. Male                                  | 1,004 (47%)                  |
| 2. Female                                | 1,117 (53%)                  |
| 3. Other                                 | 1 (<0.1%)                    |
| (Missing)                                | 4 (0.2%)                     |
| <b>Marital status</b>                    |                              |
| 1. Single/Never been married             | 556 (26%)                    |
| 2. Married                               | 744 (35%)                    |
| 3. Separated                             | 139 (6.5%)                   |
| 4. Divorced                              | 91 (4.3%)                    |
| 5. Widowed                               | 121 (5.7%)                   |
| 6. Domestic partner                      | 452 (21%)                    |
| (Missing)                                | 23 (1.1%)                    |
| <b>Employment</b>                        |                              |
| 1. Employed for an employer              | 684 (32%)                    |
| 2. Self-employed                         | 399 (19%)                    |
| 3. Retired                               | 128 (6.0%)                   |
| 4. Student                               | 115 (5.4%)                   |
| 5. Homemaker                             | 538 (25%)                    |
| 6. Unemployed and looking for a job      | 178 (8.4%)                   |
| 7. None of these/Other                   | 60 (2.8%)                    |
| (Missing)                                | 24 (1.1%)                    |
| <b>Religious service attendance</b>      |                              |
| 1. More than once a week                 | 220 (10%)                    |
| 2. Once a week                           | 451 (21%)                    |
| 3. One to three times a month            | 234 (11%)                    |
| 4. A few times a year                    | 774 (36%)                    |
| 5. Never                                 | 434 (20%)                    |
| (Missing)                                | 14 (0.6%)                    |
| <b>Education</b>                         |                              |
| 1. Up to 8                               | 487 (23%)                    |
| 2. 9-15                                  | 1,204 (57%)                  |
| 3. 16+                                   | 435 (20%)                    |
| (Missing)                                | 0 (0%)                       |
| <b>Immigration</b>                       |                              |
| 1. Born in this country                  | 2,068 (97%)                  |
| 2. Born in another country               | 37 (1.7%)                    |

| <b>Characteristic</b>                                       | <b>N = 2,126<sup>1</sup></b> |
|-------------------------------------------------------------|------------------------------|
| (Missing)                                                   | 21 (1.0%)                    |
| <b>Religious affiliation</b>                                |                              |
| 1. Christianity                                             | 1,784 (84%)                  |
| 10. Taoism                                                  | 0 (<0.1%)                    |
| 11. Confucianism                                            | 0 (0%)                       |
| 12. Primal, Animist, or Folk religion                       | 10 (0.5%)                    |
| 13. Spiritism                                               | 0 (0%)                       |
| 14. Umbanda, Candomblé, and other African-derived religions | 0 (0%)                       |
| 15. Chinese folk/traditional religion                       | 0 (0%)                       |
| 2. Islam                                                    | 0 (0%)                       |
| 3. Hinduism                                                 | 1 (<0.1%)                    |
| 4. Buddhism                                                 | 2 (<0.1%)                    |
| 5. Judaism                                                  | 2 (<0.1%)                    |
| 6. Sikhism                                                  | 0 (0%)                       |
| 7. Baha'i                                                   | 0 (0%)                       |
| 8. Jainism                                                  | 0 (0%)                       |
| 9. Shinto                                                   | 0 (<0.1%)                    |
| 96. Some other religion                                     | 16 (0.8%)                    |
| 97. No religion/Atheist/Agnostic                            | 285 (13%)                    |
| (Missing)                                                   | 26 (1.2%)                    |
| <b>RACE ETHNICITY</b>                                       |                              |
| (Missing)                                                   | 121 (5.7%)                   |
| 1101. Mexico: White                                         | 414 (19%)                    |
| 1102. Mexico: Mestizo                                       | 1,070 (50%)                  |
| 1103. Mexico: Indigenous                                    | 214 (10%)                    |
| 1104. Mexico: Black                                         | 27 (1.3%)                    |
| 1105. Mexico: Mulatto                                       | 28 (1.3%)                    |
| 9995. Prefer not to answer                                  | 116 (5.5%)                   |
| 9996. Other                                                 | 137 (6.5%)                   |

<sup>1</sup>n (%)

**Table S13b. Mexico: Childhood descriptive statistics**

| <b>Characteristic</b>                      | <b>N = 2,126<sup>1</sup></b> |
|--------------------------------------------|------------------------------|
| <b>Age</b>                                 | 41 (16)                      |
| <b>Year of birth</b>                       |                              |
| 1943 or earlier (current age: 80+ years)   | 26 (1.2%)                    |
| 1943-1953 (current age: 70-79 years)       | 98 (4.6%)                    |
| 1953-1963 (current age: 60-69 years)       | 214 (10%)                    |
| 1963-1973 (current age: 50-59 years)       | 325 (15%)                    |
| 1973-1983 (current age: 40-49 years)       | 351 (17%)                    |
| 1983-1993 (current age: 30-39 years)       | 483 (23%)                    |
| 1993-1998 (current age: 25-29 years)       | 219 (10%)                    |
| 1998-2005 (current age: 18-24 years)       | 410 (19%)                    |
| (Missing)                                  | 0 (0%)                       |
| <b>Gender</b>                              |                              |
| 1. Male                                    | 1,004 (47%)                  |
| 2. Female                                  | 1,117 (53%)                  |
| 3. Other                                   | 1 (<0.1%)                    |
| (Missing)                                  | 4 (0.2%)                     |
| <b>Parent marital status</b>               |                              |
| 1. Parents were married                    | 1,509 (71%)                  |
| 2. Parents were divorced                   | 97 (4.5%)                    |
| 3. Parents were never married              | 344 (16%)                    |
| 4. One or both of them had died            | 75 (3.5%)                    |
| 5. Unsure                                  | 42 (2.0%)                    |
| (Missing)                                  | 59 (2.8%)                    |
| <b>Age 12 religious service attendance</b> |                              |
| 1. At least once a week                    | 929 (44%)                    |
| 2. One to three times a month              | 409 (19%)                    |
| 3. Less than once a month                  | 407 (19%)                    |
| 4. Never                                   | 355 (17%)                    |
| (Missing)                                  | 26 (1.2%)                    |
| <b>Relationship with mother</b>            |                              |
| 1. Very good                               | 1,422 (67%)                  |
| 2. Somewhat good                           | 503 (24%)                    |
| 3. Somewhat bad                            | 71 (3.3%)                    |
| 4. Very bad                                | 42 (2.0%)                    |
| 97. (Does not apply)                       | 61 (2.9%)                    |
| (Missing)                                  | 27 (1.3%)                    |
| <b>Relationship with father</b>            |                              |
| 1. Very good                               | 1,119 (53%)                  |
| 2. Somewhat good                           | 558 (26%)                    |
| 3. Somewhat bad                            | 143 (6.7%)                   |
| 4. Very bad                                | 116 (5.5%)                   |
| 97. (Does not apply)                       | 174 (8.2%)                   |
| (Missing)                                  | 15 (0.7%)                    |
| <b>Outsider growing up</b>                 |                              |
| 1. Yes                                     | 295 (14%)                    |
| 2. No                                      | 1,796 (84%)                  |
| (Missing)                                  | 35 (1.7%)                    |

| Characteristic                                              | N = 2,126 <sup>1</sup> |
|-------------------------------------------------------------|------------------------|
| <b>Abuse</b>                                                |                        |
| 1. Yes                                                      | 385 (18%)              |
| 2. No                                                       | 1,699 (80%)            |
| (Missing)                                                   | 42 (2.0%)              |
| <b>Self-rated health growing up</b>                         |                        |
| 1. Excellent                                                | 662 (31%)              |
| 2. Very good                                                | 505 (24%)              |
| 3. Good                                                     | 618 (29%)              |
| 4. Fair                                                     | 290 (14%)              |
| 5. Poor                                                     | 45 (2.1%)              |
| (Missing)                                                   | 6 (0.3%)               |
| <b>Immigration status</b>                                   |                        |
| 1. Born in this country                                     | 2,068 (97%)            |
| 2. Born in another country                                  | 37 (1.7%)              |
| (Missing)                                                   | 21 (1.0%)              |
| <b>Subjective financial status of family growing up</b>     |                        |
| 1. Lived comfortably                                        | 650 (31%)              |
| 2. Got by                                                   | 663 (31%)              |
| 3. Found it difficult                                       | 651 (31%)              |
| 4. Found it very difficult                                  | 144 (6.8%)             |
| (Missing)                                                   | 17 (0.8%)              |
| <b>Religious affiliation</b>                                |                        |
| 1. Christianity                                             | 1,981 (93%)            |
| 10. Taoism                                                  | 0 (0%)                 |
| 11. Confucianism                                            | 0 (0%)                 |
| 12. Primal, Animist, or Folk religion                       | 1 (<0.1%)              |
| 13. Spiritism                                               | 0 (0%)                 |
| 14. Umbanda, Candomblé, and other African-derived religions | 0 (0%)                 |
| 15. Chinese folk/traditional religion                       | 0 (0%)                 |
| 2. Islam                                                    | 1 (<0.1%)              |
| 3. Hinduism                                                 | 1 (<0.1%)              |
| 4. Buddhism                                                 | 0 (0%)                 |
| 5. Judaism                                                  | 6 (0.3%)               |
| 6. Sikhism                                                  | 1 (<0.1%)              |
| 7. Baha'i                                                   | 0 (0%)                 |
| 8. Jainism                                                  | 0 (0%)                 |
| 9. Shinto                                                   | 0 (0%)                 |
| 96. Some other religion                                     | 4 (0.2%)               |
| 97. No religion/Atheist/Agnostic                            | 106 (5.0%)             |
| (Missing)                                                   | 26 (1.2%)              |
| <b>Race/Ethnicity</b>                                       |                        |
| (Missing)                                                   | 121 (5.7%)             |
| 1101. Mexico: White                                         | 414 (19%)              |
| 1102. Mexico: Mestizo                                       | 1,070 (50%)            |
| 1103. Mexico: Indigenous                                    | 214 (10%)              |
| 1104. Mexico: Black                                         | 27 (1.3%)              |
| 1105. Mexico: Mulatto                                       | 28 (1.3%)              |

| Characteristic             | N = 2,126 <sup>1</sup> |
|----------------------------|------------------------|
| 9995. Prefer not to answer | 116 (5.5%)             |
| 9996. Other                | 137 (6.5%)             |

<sup>1</sup>Mean (SD); n (%)

**Table S13c. Mexico: Proportions by demographic category**

| Variable                     | Category                                 | Proportion | 95% CI         | SE    | p-value  |
|------------------------------|------------------------------------------|------------|----------------|-------|----------|
| Age group                    | 1998-2005 (current age: 18-24 years)     | 0.862      | (0.809, 0.916) | 0.027 | 5.60e-01 |
|                              | 1943 or earlier (current age: 80+ years) | 0.669      | (0.454, 0.884) | 0.101 |          |
|                              | 1943-1953 (current age: 70-79 years)     | 0.794      | (0.698, 0.890) | 0.048 |          |
|                              | 1953-1963 (current age: 60-69 years)     | 0.825      | (0.763, 0.886) | 0.031 |          |
|                              | 1963-1973 (current age: 50-59 years)     | 0.814      | (0.767, 0.862) | 0.024 |          |
|                              | 1973-1983 (current age: 40-49 years)     | 0.811      | (0.762, 0.860) | 0.025 |          |
|                              | 1983-1993 (current age: 30-39 years)     | 0.795      | (0.744, 0.846) | 0.026 |          |
|                              | 1993-1998 (current age: 25-29 years)     | 0.825      | (0.754, 0.896) | 0.036 |          |
|                              | Male                                     | 0.835      | (0.802, 0.868) | 0.017 |          |
|                              | Female                                   | 0.803      | (0.774, 0.832) | 0.015 |          |
| Gender                       | Other                                    | 1.000      | *              | *     | < 1e-16  |
| Marital status               | Single/Never been married                | 0.822      | (0.775, 0.869) | 0.024 |          |
|                              | Divorced                                 | 0.868      | (0.791, 0.946) | 0.039 |          |
|                              | Domestic partner                         | 0.784      | (0.730, 0.838) | 0.027 |          |
|                              | Married                                  | 0.843      | (0.809, 0.876) | 0.017 |          |
|                              | Separated                                | 0.785      | (0.703, 0.866) | 0.041 |          |
|                              | Widowed                                  | 0.778      | (0.681, 0.876) | 0.049 |          |
|                              | Employed for an employer                 | 0.835      | (0.798, 0.871) | 0.019 |          |
| Employment                   | Homemaker                                | 0.770      | (0.724, 0.817) | 0.024 | 2.51e-01 |
|                              | None of these/Other                      | 0.816      | (0.685, 0.947) | 0.065 |          |
|                              | Retired                                  | 0.790      | (0.704, 0.877) | 0.043 |          |
|                              | Self-employed                            | 0.841      | (0.792, 0.891) | 0.025 |          |
|                              | Student                                  | 0.881      | (0.788, 0.974) | 0.047 |          |
|                              | Unemployed and looking for a job         | 0.827      | (0.744, 0.910) | 0.042 |          |
|                              | Religious service attendance             |            |                |       |          |
| Religious service attendance | Never                                    | 0.778      | (0.727, 0.829) | 0.026 | 1.09e-01 |
|                              | A few times a year                       | 0.828      | (0.793, 0.863) | 0.018 |          |
|                              | More than once a week                    | 0.872      | (0.818, 0.926) | 0.028 |          |
|                              | Once a week                              | 0.805      | (0.751, 0.858) | 0.027 |          |
|                              | One to three times a month               | 0.836      | (0.770, 0.902) | 0.033 |          |
| Education                    | 9-15                                     | 0.822      | (0.792, 0.852) | 0.015 | 4.44e-04 |
|                              | 16+                                      | 0.879      | (0.843, 0.916) | 0.019 |          |

| Variable                 | Category                                                          | Proportion | 95% CI         | SE    | p-value  |
|--------------------------|-------------------------------------------------------------------|------------|----------------|-------|----------|
| Immigration status       | Up to 8<br>Born in this<br>country                                | 0.755      | (0.705, 0.805) | 0.025 | 2.04e-09 |
|                          | Born in another<br>country                                        | 0.815      | (0.793, 0.838) | 0.011 |          |
|                          | No<br>religion/Atheist/Ag<br>nostic                               | 0.969      | (0.920, 1.000) | 0.024 |          |
| Religious<br>affiliation | Christianity                                                      | 0.773      | (0.704, 0.842) | 0.035 | < 1e-16  |
|                          | Combined                                                          | 0.822      | (0.799, 0.846) | 0.012 |          |
|                          | Spiritism                                                         | 0.988      | (0.957, 1.000) | 0.015 |          |
|                          | Umbanda,<br>Candomblé, and<br>other African-<br>derived religions | *          | *              | *     |          |
|                          | Buddhism                                                          | *          | *              | *     |          |
|                          | Islam                                                             | *          | *              | *     |          |
|                          | Chinese<br>folk/traditional<br>religion                           | *          | *              | *     |          |
|                          | Hinduism                                                          | *          | *              | *     |          |
|                          | Judaism                                                           | *          | *              | *     |          |
|                          | Primal, Animist, or<br>Folk religion                              | *          | *              | *     |          |

**Table S13d. Mexico: Childhood predictors regression analysis**

| Variable                                                        | Category                                                                                                                | Risk-Ratio                       | logRR SE                         | RR 95% CI                                                | Global p-value |
|-----------------------------------------------------------------|-------------------------------------------------------------------------------------------------------------------------|----------------------------------|----------------------------------|----------------------------------------------------------|----------------|
| Relationship with your mother growing up                        | (Ref: Very bad/somewhat bad)<br>Very good/somewhat good                                                                 | 1.053                            | 0.048                            | (0.96,1.16)                                              | 0.326          |
| Relationship with your father growing up                        | (Ref: Very bad/somewhat bad)<br>Very good/somewhat good                                                                 | 0.965                            | 0.040                            | (0.89,1.04)                                              | 0.392          |
| Parents married to each other when you were around 12 years old | (Ref: Parents married)<br>One or both of them had died<br>Parents were divorced<br>Parents were never married<br>Unsure | 0.960<br>0.868<br>0.974<br>0.951 | 0.067<br>0.061<br>0.035<br>0.085 | (0.84,1.10)<br>(0.77,0.98)<br>(0.91,1.04)<br>(0.80,1.12) | 0.099          |
| Feelings about familys household income when growing up         | (Ref: Got by)<br>Found it difficult<br>Found it very difficult<br>Lived comfortably                                     | 0.978<br>1.002<br>1.037          | 0.029<br>0.043<br>0.027          | (0.92,1.03)<br>(0.92,1.09)<br>(0.98,1.09)                | 0.488          |
| Physically or sexually abused when growing up                   | (Ref: No)                                                                                                               | 1.062                            | 0.026                            | (1.01,1.12)                                              | 0.024          |
| Felt like an outsider in your family when growing up            | (Ref: No)<br>Yes                                                                                                        | 1.019                            | 0.031                            | (0.96,1.08)                                              | 0.497          |
| Your health when growing up                                     | (Ref: Good)<br>Excellent<br>Fair<br>Poor<br>Very good                                                                   | 0.994<br>0.987<br>0.993<br>1.004 | 0.028<br>0.037<br>0.088<br>0.029 | (0.94,1.05)<br>(0.92,1.06)<br>(0.83,1.18)<br>(0.95,1.06) | 0.823          |
| Born in This                                                    | (Ref: Born in this                                                                                                      |                                  |                                  |                                                          | 1.15e-06       |

| Variable                                                                                  | Category                                  | Risk-Ratio | logRR SE | RR 95% CI   | Global p-value |
|-------------------------------------------------------------------------------------------|-------------------------------------------|------------|----------|-------------|----------------|
| country                                                                                   | country)                                  |            |          |             |                |
|                                                                                           | Born in another country                   | 1.169      | 0.032    | (1.10,1.25) |                |
| How Often You Attended Religious Services or Worshipped When You Were Around 12 Years Old | (Ref: Never)                              |            |          |             | 0.051          |
|                                                                                           | At least once a week                      | 1.083      | 0.033    | (1.02,1.15) |                |
|                                                                                           | Less than once a month                    | 1.037      | 0.038    | (0.96,1.12) |                |
|                                                                                           | One to three times a month                | 0.988      | 0.041    | (0.91,1.07) |                |
| Year of birth (age group)                                                                 | (Ref: 1998-2005; current age: 18-24)      |            |          |             | 0.290          |
|                                                                                           | 1943 or earlier (current age: 80+ years)  | 0.829      | 0.107    | (0.67,1.02) |                |
|                                                                                           | 1943-1953 (current age: 70-79 years)      | 0.947      | 0.054    | (0.85,1.05) |                |
|                                                                                           | 1953-1963 (current age: 60-69 years)      | 0.975      | 0.042    | (0.90,1.06) |                |
|                                                                                           | 1963-1973 (current age: 50-59 years)      | 0.955      | 0.034    | (0.89,1.02) |                |
|                                                                                           | 1973-1983 (current age: 40-49 years)      | 0.952      | 0.036    | (0.89,1.02) |                |
|                                                                                           | 1983-1993 (current age: 30-39 years)      | 0.941      | 0.036    | (0.88,1.01) |                |
|                                                                                           | 1993-1998 (current age: 25-29 years)      | 0.960      | 0.044    | (0.88,1.05) |                |
| Religion when twelve years old                                                            | (Ref: No religion/Atheist/Agnostic)       |            |          |             | 0.199          |
|                                                                                           | Christianity                              | 0.930      | 0.043    | (0.85,1.01) |                |
|                                                                                           | Collapsed affiliations with prevalence<3% | 0.798      | 0.238    | (0.50,1.27) |                |
| Race plurality (prominent race/ethnic group [0] or not [1])                               | (Ref: Plurality group)                    |            |          |             | 0.188          |
|                                                                                           | Non-plurality groups                      | 0.969      | 0.022    | (0.93,1.01) |                |

**Table S13e. Mexico: Sensitivity to unmeasured confounding of childhood predictors**

| Variable                                                                                 | Category                                 | E-value for Estimate | E-value for 95% CI |
|------------------------------------------------------------------------------------------|------------------------------------------|----------------------|--------------------|
| Relationship with your mother growing up                                                 | (Ref: Very bad/somewhat bad)             |                      |                    |
|                                                                                          | Very good/somewhat good                  | 1.29                 | 1.00               |
| Relationship with your father growing up                                                 | (Ref: Very bad/somewhat bad)             |                      |                    |
|                                                                                          | Very good/somewhat good                  | 1.23                 | 1.00               |
| Parents married to each other when you were around 12 years old                          | (Ref: Parents married)                   |                      |                    |
|                                                                                          | One or both of them had died             | 1.25                 | 1.00               |
|                                                                                          | Parents were divorced                    | 1.57                 | 1.17               |
|                                                                                          | Parents were never married               | 1.19                 | 1.00               |
|                                                                                          | Unsure                                   | 1.28                 | 1.00               |
| Feelings about familys household income when growing up                                  | (Ref: Got by)                            |                      |                    |
|                                                                                          | Found it difficult                       | 1.17                 | 1.00               |
|                                                                                          | Found it very difficult                  | 1.05                 | 1.00               |
|                                                                                          | Lived comfortably                        | 1.23                 | 1.00               |
| Physically or sexually abused when growing up                                            | (Ref: No)                                |                      |                    |
|                                                                                          |                                          | 1.32                 | 1.10               |
| Felt like an outsider in your family when growing up                                     | (Ref: No)                                |                      |                    |
|                                                                                          | Yes                                      | 1.16                 | 1.00               |
| Your health when growing up                                                              | (Ref: Good)                              |                      |                    |
|                                                                                          | Excellent                                | 1.08                 | 1.00               |
|                                                                                          | Fair                                     | 1.13                 | 1.00               |
|                                                                                          | Poor                                     | 1.09                 | 1.00               |
|                                                                                          | Very good                                | 1.07                 | 1.00               |
| Born in This country                                                                     | (Ref: Born in this country)              |                      |                    |
|                                                                                          | Born in another country                  | 1.61                 | 1.43               |
| How Often You Attended Religious Services or Worshiped When You Were Around 12 Years Old | (Ref: Never)                             |                      |                    |
|                                                                                          | At least once a week                     | 1.38                 | 1.14               |
|                                                                                          | Less than once a month                   | 1.23                 | 1.00               |
|                                                                                          | One to three times a month               | 1.12                 | 1.00               |
| Year of birth (age group)                                                                | (Ref: 1998-2005; current age: 18-24)     |                      |                    |
|                                                                                          | 1943 or earlier (current age: 80+ years) | 1.71                 | 1.00               |
|                                                                                          | 1943-1953 (current age: 70-79 years)     | 1.30                 | 1.00               |

| Variable                                                    | Category                                  | E-value for Estimate | E-value for 95% CI |
|-------------------------------------------------------------|-------------------------------------------|----------------------|--------------------|
|                                                             | 1953-1963 (current age: 60-69 years)      | 1.19                 | 1.00               |
|                                                             | 1963-1973 (current age: 50-59 years)      | 1.27                 | 1.00               |
|                                                             | 1973-1983 (current age: 40-49 years)      | 1.28                 | 1.00               |
|                                                             | 1983-1993 (current age: 30-39 years)      | 1.32                 | 1.00               |
|                                                             | 1993-1998 (current age: 25-29 years)      | 1.25                 | 1.00               |
| Religion when twelve years old                              | (Ref: No religion/Atheist/Agnostic)       |                      |                    |
|                                                             | Christianity                              | 1.36                 | 1.00               |
|                                                             | Collapsed affiliations with prevalence<3% | 1.82                 | 1.00               |
| Race plurality (prominent race/ethnic group [0] or not [1]) | (Ref: Plurality group)                    |                      |                    |
|                                                             | Non-plurality groups                      | 1.21                 | 1.00               |

**Table S14a. Nigeria: Demographic descriptive statistics**

| <b>Characteristic</b>                    | <b>N = 4,943<sup>1</sup></b> |
|------------------------------------------|------------------------------|
| <b>Age group</b>                         |                              |
| 1943 or earlier (current age: 80+ years) | 36 (0.7%)                    |
| 1943-1953 (current age: 70-79 years)     | 93 (1.9%)                    |
| 1953-1963 (current age: 60-69 years)     | 195 (3.9%)                   |
| 1963-1973 (current age: 50-59 years)     | 412 (8.3%)                   |
| 1973-1983 (current age: 40-49 years)     | 703 (14%)                    |
| 1983-1993 (current age: 30-39 years)     | 1,379 (28%)                  |
| 1993-1998 (current age: 25-29 years)     | 899 (18%)                    |
| 1998-2005 (current age: 18-24 years)     | 1,227 (25%)                  |
| (Missing)                                | 0 (0%)                       |
| <b>Gender</b>                            |                              |
| 1. Male                                  | 2,471 (50%)                  |
| 2. Female                                | 2,472 (50%)                  |
| 3. Other                                 | 0 (<0.1%)                    |
| (Missing)                                | 0 (0%)                       |
| <b>Marital status</b>                    |                              |
| 1. Single/Never been married             | 1,757 (36%)                  |
| 2. Married                               | 2,858 (58%)                  |
| 3. Separated                             | 89 (1.8%)                    |
| 4. Divorced                              | 51 (1.0%)                    |
| 5. Widowed                               | 155 (3.1%)                   |
| 6. Domestic partner                      | 7 (0.2%)                     |
| (Missing)                                | 26 (0.5%)                    |
| <b>Employment</b>                        |                              |
| 1. Employed for an employer              | 496 (10%)                    |
| 2. Self-employed                         | 2,770 (56%)                  |
| 3. Retired                               | 112 (2.3%)                   |
| 4. Student                               | 512 (10%)                    |
| 5. Homemaker                             | 370 (7.5%)                   |
| 6. Unemployed and looking for a job      | 504 (10%)                    |
| 7. None of these/Other                   | 173 (3.5%)                   |
| (Missing)                                | 6 (0.1%)                     |
| <b>Religious service attendance</b>      |                              |
| 1. More than once a week                 | 2,967 (60%)                  |
| 2. Once a week                           | 1,344 (27%)                  |
| 3. One to three times a month            | 378 (7.6%)                   |
| 4. A few times a year                    | 178 (3.6%)                   |
| 5. Never                                 | 64 (1.3%)                    |
| (Missing)                                | 12 (0.3%)                    |
| <b>Education</b>                         |                              |
| 1. Up to 8                               | 1,858 (38%)                  |
| 2. 9-15                                  | 2,998 (61%)                  |
| 3. 16+                                   | 86 (1.7%)                    |
| (Missing)                                | 2 (<0.1%)                    |
| <b>Immigration</b>                       |                              |
| 1. Born in this country                  | 4,909 (99%)                  |
| 2. Born in another country               | 33 (0.7%)                    |

| <b>Characteristic</b>                                       | <b>N = 4,943<sup>1</sup></b> |
|-------------------------------------------------------------|------------------------------|
| (Missing)                                                   | 0 (<0.1%)                    |
| <b>Religious affiliation</b>                                |                              |
| 1. Christianity                                             | 2,476 (50%)                  |
| 10. Taoism                                                  | 0 (0%)                       |
| 11. Confucianism                                            | 0 (<0.1%)                    |
| 12. Primal, Animist, or Folk religion                       | 23 (0.5%)                    |
| 13. Spiritism                                               | 0 (0%)                       |
| 14. Umbanda, Candomblé, and other African-derived religions | 0 (0%)                       |
| 15. Chinese folk/traditional religion                       | 0 (0%)                       |
| 2. Islam                                                    | 2,425 (49%)                  |
| 3. Hinduism                                                 | 0 (0%)                       |
| 4. Buddhism                                                 | 0 (0%)                       |
| 5. Judaism                                                  | 0 (0%)                       |
| 6. Sikhism                                                  | 0 (0%)                       |
| 7. Baha'i                                                   | 0 (0%)                       |
| 8. Jainism                                                  | 0 (0%)                       |
| 9. Shinto                                                   | 1 (<0.1%)                    |
| 96. Some other religion                                     | 0 (0%)                       |
| 97. No religion/Atheist/Agnostic                            | 12 (0.2%)                    |
| (Missing)                                                   | 7 (0.1%)                     |
| <b>RACE ETHNICITY</b>                                       |                              |
| (Missing)                                                   | 2 (<0.1%)                    |
| 1201. Nigeria: Hausa                                        | 1,730 (35%)                  |
| 1202. Nigeria: Yoruba                                       | 874 (18%)                    |
| 1203. Nigeria: Igbo (Ibo)                                   | 774 (16%)                    |
| 1204. Nigeria: Edo                                          | 75 (1.5%)                    |
| 1205. Nigeria: Urhobo                                       | 34 (0.7%)                    |
| 1206. Nigeria: Fulani                                       | 188 (3.8%)                   |
| 1207. Nigeria: Kanuri                                       | 27 (0.5%)                    |
| 1208. Nigeria: Tiv                                          | 140 (2.8%)                   |
| 1209. Nigeria: Efik                                         | 37 (0.7%)                    |
| 1210. Nigeria: Ijaw                                         | 79 (1.6%)                    |
| 1211. Nigeria: Igala                                        | 62 (1.3%)                    |
| 1212. Nigeria: Ibibio                                       | 135 (2.7%)                   |
| 1213. Nigeria: Idoma                                        | 46 (0.9%)                    |
| 9996. Other                                                 | 739 (15%)                    |

<sup>1</sup>n (%)

**Table S14b. Nigeria: Childhood descriptive statistics**

| <b>Characteristic</b>                      | <b>N = 4,943<sup>1</sup></b> |
|--------------------------------------------|------------------------------|
| <b>Age</b>                                 | 35 (14)                      |
| <b>Year of birth</b>                       |                              |
| 1943 or earlier (current age: 80+ years)   | 36 (0.7%)                    |
| 1943-1953 (current age: 70-79 years)       | 93 (1.9%)                    |
| 1953-1963 (current age: 60-69 years)       | 195 (3.9%)                   |
| 1963-1973 (current age: 50-59 years)       | 412 (8.3%)                   |
| 1973-1983 (current age: 40-49 years)       | 703 (14%)                    |
| 1983-1993 (current age: 30-39 years)       | 1,379 (28%)                  |
| 1993-1998 (current age: 25-29 years)       | 899 (18%)                    |
| 1998-2005 (current age: 18-24 years)       | 1,227 (25%)                  |
| (Missing)                                  | 0 (0%)                       |
| <b>Gender</b>                              |                              |
| 1. Male                                    | 2,471 (50%)                  |
| 2. Female                                  | 2,472 (50%)                  |
| 3. Other                                   | 0 (<0.1%)                    |
| (Missing)                                  | 0 (0%)                       |
| <b>Parent marital status</b>               |                              |
| 1. Parents were married                    | 4,061 (82%)                  |
| 2. Parents were divorced                   | 212 (4.3%)                   |
| 3. Parents were never married              | 251 (5.1%)                   |
| 4. One or both of them had died            | 326 (6.6%)                   |
| 5. Unsure                                  | 39 (0.8%)                    |
| (Missing)                                  | 54 (1.1%)                    |
| <b>Age 12 religious service attendance</b> |                              |
| 1. At least once a week                    | 4,301 (87%)                  |
| 2. One to three times a month              | 423 (8.6%)                   |
| 3. Less than once a month                  | 88 (1.8%)                    |
| 4. Never                                   | 95 (1.9%)                    |
| (Missing)                                  | 36 (0.7%)                    |
| <b>Relationship with mother</b>            |                              |
| 1. Very good                               | 4,315 (87%)                  |
| 2. Somewhat good                           | 483 (9.8%)                   |
| 3. Somewhat bad                            | 47 (1.0%)                    |
| 4. Very bad                                | 13 (0.3%)                    |
| 97. (Does not apply)                       | 74 (1.5%)                    |
| (Missing)                                  | 9 (0.2%)                     |
| <b>Relationship with father</b>            |                              |
| 1. Very good                               | 4,020 (81%)                  |
| 2. Somewhat good                           | 679 (14%)                    |
| 3. Somewhat bad                            | 60 (1.2%)                    |
| 4. Very bad                                | 30 (0.6%)                    |
| 97. (Does not apply)                       | 136 (2.7%)                   |
| (Missing)                                  | 19 (0.4%)                    |
| <b>Outsider growing up</b>                 |                              |
| 1. Yes                                     | 503 (10%)                    |
| 2. No                                      | 4,369 (88%)                  |
| (Missing)                                  | 71 (1.4%)                    |

| Characteristic                                              | N = 4,943 <sup>1</sup> |
|-------------------------------------------------------------|------------------------|
| <b>Abuse</b>                                                |                        |
| 1. Yes                                                      | 631 (13%)              |
| 2. No                                                       | 4,251 (86%)            |
| (Missing)                                                   | 62 (1.2%)              |
| <b>Self-rated health growing up</b>                         |                        |
| 1. Excellent                                                | 1,926 (39%)            |
| 2. Very good                                                | 1,890 (38%)            |
| 3. Good                                                     | 842 (17%)              |
| 4. Fair                                                     | 193 (3.9%)             |
| 5. Poor                                                     | 83 (1.7%)              |
| (Missing)                                                   | 10 (0.2%)              |
| <b>Immigration status</b>                                   |                        |
| 1. Born in this country                                     | 4,909 (99%)            |
| 2. Born in another country                                  | 33 (0.7%)              |
| (Missing)                                                   | 0 (<0.1%)              |
| <b>Subjective financial status of family growing up</b>     |                        |
| 1. Lived comfortably                                        | 1,622 (33%)            |
| 2. Got by                                                   | 1,724 (35%)            |
| 3. Found it difficult                                       | 1,168 (24%)            |
| 4. Found it very difficult                                  | 405 (8.2%)             |
| (Missing)                                                   | 24 (0.5%)              |
| <b>Religious affiliation</b>                                |                        |
| 1. Christianity                                             | 2,476 (50%)            |
| 10. Taoism                                                  | 0 (0%)                 |
| 11. Confucianism                                            | 1 (<0.1%)              |
| 12. Primal, Animist, or Folk religion                       | 8 (0.2%)               |
| 13. Spiritism                                               | 0 (0%)                 |
| 14. Umbanda, Candomblé, and other African-derived religions | 0 (0%)                 |
| 15. Chinese folk/traditional religion                       | 0 (0%)                 |
| 2. Islam                                                    | 2,436 (49%)            |
| 3. Hinduism                                                 | 0 (0%)                 |
| 4. Buddhism                                                 | 0 (0%)                 |
| 5. Judaism                                                  | 0 (0%)                 |
| 6. Sikhism                                                  | 0 (0%)                 |
| 7. Baha'i                                                   | 0 (0%)                 |
| 8. Jainism                                                  | 0 (0%)                 |
| 9. Shinto                                                   | 0 (0%)                 |
| 96. Some other religion                                     | 0 (0%)                 |
| 97. No religion/Atheist/Agnostic                            | 15 (0.3%)              |
| (Missing)                                                   | 8 (0.2%)               |
| <b>Race/Ethnicity</b>                                       |                        |
| (Missing)                                                   | 2 (<0.1%)              |
| 1201. Nigeria: Hausa                                        | 1,730 (35%)            |
| 1202. Nigeria: Yoruba                                       | 874 (18%)              |
| 1203. Nigeria: Igbo (Ibo)                                   | 774 (16%)              |
| 1204. Nigeria: Edo                                          | 75 (1.5%)              |
| 1205. Nigeria: Urhobo                                       | 34 (0.7%)              |

| <b>Characteristic</b> | <b>N = 4,943<sup>1</sup></b> |
|-----------------------|------------------------------|
| 1206. Nigeria: Fulani | 188 (3.8%)                   |
| 1207. Nigeria: Kanuri | 27 (0.5%)                    |
| 1208. Nigeria: Tiv    | 140 (2.8%)                   |
| 1209. Nigeria: Efik   | 37 (0.7%)                    |
| 1210. Nigeria: Ijaw   | 79 (1.6%)                    |
| 1211. Nigeria: Igala  | 62 (1.3%)                    |
| 1212. Nigeria: Ibibio | 135 (2.7%)                   |
| 1213. Nigeria: Idoma  | 46 (0.9%)                    |
| 9996. Other           | 739 (15%)                    |

<sup>1</sup>Mean (SD); n (%)

**Table S14c. Nigeria: Proportions by demographic category**

| Variable                     | Category                                 | Proportion | 95% CI         | SE    | p-value  |
|------------------------------|------------------------------------------|------------|----------------|-------|----------|
| Age group                    | 1998-2005 (current age: 18-24 years)     | 0.904      | (0.875, 0.932) | 0.015 | 1.34e-01 |
|                              | 1943 or earlier (current age: 80+ years) | 0.972      | (0.909, 1.000) | 0.030 |          |
|                              | 1943-1953 (current age: 70-79 years)     | 0.871      | (0.760, 0.983) | 0.056 |          |
|                              | 1953-1963 (current age: 60-69 years)     | 0.793      | (0.692, 0.894) | 0.051 |          |
|                              | 1963-1973 (current age: 50-59 years)     | 0.908      | (0.855, 0.961) | 0.027 |          |
|                              | 1973-1983 (current age: 40-49 years)     | 0.906      | (0.873, 0.940) | 0.017 |          |
|                              | 1983-1993 (current age: 30-39 years)     | 0.899      | (0.878, 0.920) | 0.010 |          |
|                              | 1993-1998 (current age: 25-29 years)     | 0.903      | (0.874, 0.931) | 0.015 |          |
|                              | Male                                     | 0.903      | (0.883, 0.924) | 0.011 |          |
|                              | Female                                   | 0.893      | (0.873, 0.914) | 0.010 |          |
| Gender                       | Other                                    | 1.000      | *              | *     | < 1e-16  |
| Marital status               | Single/Never been married                | 0.909      | (0.890, 0.929) | 0.010 | < 1e-16  |
|                              | Divorced                                 | 0.889      | (0.781, 0.996) | 0.053 |          |
|                              | Domestic partner                         | 0.952      | *              | *     |          |
|                              | Married                                  | 0.893      | (0.872, 0.915) | 0.011 |          |
|                              | Separated                                | 0.943      | (0.879, 1.000) | 0.032 |          |
|                              | Widowed                                  | 0.844      | (0.759, 0.929) | 0.043 |          |
|                              | Employed for an employer                 | 0.943      | (0.920, 0.967) | 0.012 | 4.18e-02 |
| Employment                   | Homemaker                                | 0.905      | (0.854, 0.957) | 0.026 |          |
|                              | None of these/Other                      | 0.857      | (0.762, 0.951) | 0.048 |          |
|                              | Retired                                  | 0.875      | (0.770, 0.980) | 0.053 |          |
|                              | Self-employed                            | 0.893      | (0.873, 0.914) | 0.010 |          |
|                              | Student                                  | 0.894      | (0.851, 0.936) | 0.022 |          |
|                              | Unemployed and looking for a job         | 0.901      | (0.863, 0.939) | 0.019 |          |
| Religious service attendance | Never                                    | 0.899      | (0.785, 1.000) | 0.057 | 9.12e-01 |
|                              | A few times a year                       | 0.885      | (0.818, 0.952) | 0.034 |          |
|                              | More than once a week                    | 0.902      | (0.881, 0.923) | 0.011 |          |
|                              | Once a week                              | 0.891      | (0.868, 0.915) | 0.012 |          |
|                              | One to three times a month               | 0.903      | (0.858, 0.947) | 0.023 |          |
| Education                    | 9-15                                     | 0.910      | (0.896, 0.924) | 0.007 | 5.98e-03 |
|                              | 16+                                      | 0.949      | (0.918, 0.980) | 0.016 |          |

| Variable                 | Category                                                          | Proportion | 95% CI         | SE    | p-value  |
|--------------------------|-------------------------------------------------------------------|------------|----------------|-------|----------|
| Immigration status       | Up to 8<br>Born in this<br>country                                | 0.878      | (0.846, 0.909) | 0.016 | 1.89e-01 |
|                          | Born in another<br>country                                        | 0.898      | (0.882, 0.914) | 0.008 |          |
|                          | No<br>religion/Atheist/Ag<br>nostic                               | 0.941      | (0.878, 1.000) | 0.031 |          |
| Religious<br>affiliation | Christianity                                                      | *          | *              | *     | 3.61e-02 |
|                          | Combined                                                          | 0.917      | (0.902, 0.932) | 0.008 |          |
|                          | Spiritism                                                         | 0.947      | (0.879, 1.000) | 0.033 |          |
|                          | Umbanda,<br>Candomblé, and<br>other African-<br>derived religions | *          | *              | *     |          |
|                          | Buddhism                                                          | *          | *              | *     |          |
|                          | Islam                                                             | 0.879      | (0.851, 0.907) | 0.014 |          |
|                          | Chinese<br>folk/traditional<br>religion                           | *          | *              | *     |          |
|                          | Hinduism                                                          | *          | *              | *     |          |
|                          | Judaism                                                           | *          | *              | *     |          |
|                          | Primal, Animist, or<br>Folk religion                              | *          | *              | *     |          |

**Table S14d. Nigeria: Childhood predictors regression analysis**

| Variable                                                        | Category                                                                                                                | Risk-Ratio                       | logRR SE                         | RR 95% CI                                                | Global p-value |
|-----------------------------------------------------------------|-------------------------------------------------------------------------------------------------------------------------|----------------------------------|----------------------------------|----------------------------------------------------------|----------------|
| Relationship with your mother growing up                        | (Ref: Very bad/somewhat bad)<br>Very good/somewhat good                                                                 | 0.987                            | 0.030                            | (0.93,1.05)                                              | 0.533          |
| Relationship with your father growing up                        | (Ref: Very bad/somewhat bad)<br>Very good/somewhat good                                                                 | 0.942                            | 0.026                            | (0.90,0.99)                                              | 0.024          |
| Parents married to each other when you were around 12 years old | (Ref: Parents married)<br>One or both of them had died<br>Parents were divorced<br>Parents were never married<br>Unsure | 1.019<br>1.023<br>1.006<br>1.010 | 0.024<br>0.025<br>0.025<br>0.036 | (0.97,1.07)<br>(0.97,1.07)<br>(0.96,1.06)<br>(0.94,1.08) | 0.701          |
| Feelings about familys household income when growing up         | (Ref: Got by)<br>Found it difficult<br>Found it very difficult<br>Lived comfortably                                     | 0.989<br>1.008<br>0.990          | 0.015<br>0.024<br>0.015          | (0.96,1.02)<br>(0.96,1.06)<br>(0.96,1.02)                | 0.648          |
| Physically or sexually abused when growing up                   | (Ref: No)                                                                                                               | 1.024                            | 0.015                            | (1.00,1.05)                                              | 0.127          |
| Felt like an outsider in your family when growing up            | (Ref: No)<br>Yes                                                                                                        | 0.985                            | 0.023                            | (0.94,1.03)                                              | 0.486          |
| Your health when growing up                                     | (Ref: Good)<br>Excellent<br>Fair<br>Poor<br>Very good                                                                   | 1.020<br>0.987<br>1.007<br>1.004 | 0.019<br>0.037<br>0.060<br>0.019 | (0.98,1.06)<br>(0.92,1.06)<br>(0.90,1.13)<br>(0.97,1.04) | 0.726          |
| Born in This                                                    | (Ref: Born in this                                                                                                      |                                  |                                  |                                                          | 0.267          |

| Variable                                                                                  | Category                                  | Risk-Ratio | logRR SE | RR 95% CI   | Global p-value |
|-------------------------------------------------------------------------------------------|-------------------------------------------|------------|----------|-------------|----------------|
| country                                                                                   | country)                                  |            |          |             |                |
|                                                                                           | Born in another country                   | 1.053      | 0.042    | (0.97,1.14) |                |
| How Often You Attended Religious Services or Worshipped When You Were Around 12 Years Old | (Ref: Never)                              |            |          |             | 0.472          |
|                                                                                           | At least once a week                      | 0.976      | 0.044    | (0.90,1.06) |                |
|                                                                                           | Less than once a month                    | 0.929      | 0.064    | (0.82,1.05) |                |
|                                                                                           | One to three times a month                | 0.944      | 0.053    | (0.85,1.05) |                |
| Year of birth (age group)                                                                 | (Ref: 1998-2005; current age: 18-24)      |            |          |             | 0.141          |
|                                                                                           | 1943 or earlier (current age: 80+ years)  | 1.041      | 0.034    | (0.97,1.11) |                |
|                                                                                           | 1943-1953 (current age: 70-79 years)      | 0.952      | 0.055    | (0.85,1.06) |                |
|                                                                                           | 1953-1963 (current age: 60-69 years)      | 0.884      | 0.051    | (0.80,0.98) |                |
|                                                                                           | 1963-1973 (current age: 50-59 years)      | 0.994      | 0.029    | (0.94,1.05) |                |
|                                                                                           | 1973-1983 (current age: 40-49 years)      | 0.995      | 0.020    | (0.96,1.03) |                |
|                                                                                           | 1983-1993 (current age: 30-39 years)      | 0.993      | 0.017    | (0.96,1.03) |                |
|                                                                                           | 1993-1998 (current age: 25-29 years)      | 1.000      | 0.019    | (0.96,1.04) |                |
| Religion when twelve years old                                                            | (Ref: Christianity)                       |            |          |             | 0.355          |
|                                                                                           | Collapsed affiliations with prevalence<3% | 1.042      | 0.031    | (0.98,1.11) |                |
|                                                                                           | Islam                                     | 0.984      | 0.020    | (0.95,1.02) |                |
| Race plurality (prominent race/ethnic group [0] or not [1])                               | (Ref: Plurality group)                    |            |          |             | 0.166          |
|                                                                                           | Non-plurality groups                      | 1.034      | 0.022    | (0.99,1.08) |                |

**Table S14e. Nigeria: Sensitivity to unmeasured confounding of childhood predictors**

| Variable                                                                                 | Category                                                                                                                 | E-value for Estimate         | E-value for 95% CI           |
|------------------------------------------------------------------------------------------|--------------------------------------------------------------------------------------------------------------------------|------------------------------|------------------------------|
| Relationship with your mother growing up                                                 | (Ref: Very bad/somewhat bad)<br>Very good/somewhat good                                                                  | 1.13                         | 1.00                         |
| Relationship with your father growing up                                                 | (Ref: Very bad/somewhat bad)<br>Very good/somewhat good                                                                  | 1.32                         | 1.10                         |
| Parents married to each other when you were around 12 years old                          | (Ref: Parents married)<br>One or both of them had died<br>Parents were divorced<br>Parents were never married<br>Unsure  | 1.16<br>1.18<br>1.09<br>1.11 | 1.00<br>1.00<br>1.00<br>1.00 |
| Feelings about family's household income when growing up                                 | (Ref: Got by)<br>Found it difficult<br>Found it very difficult<br>Lived comfortably                                      | 1.12<br>1.10<br>1.11         | 1.00<br>1.00<br>1.00         |
| Physically or sexually abused when growing up                                            | (Ref: No)                                                                                                                | 1.18                         | 1.00                         |
| Felt like an outsider in your family when growing up                                     | (Ref: No)<br>Yes                                                                                                         | 1.14                         | 1.00                         |
| Your health when growing up                                                              | (Ref: Good)<br>Excellent<br>Fair<br>Poor<br>Very good                                                                    | 1.16<br>1.13<br>1.09<br>1.07 | 1.00<br>1.00<br>1.00<br>1.00 |
| Born in This country                                                                     | (Ref: Born in this country)<br>Born in another country                                                                   | 1.29                         | 1.00                         |
| How Often You Attended Religious Services or Worshiped When You Were Around 12 Years Old | (Ref: Never)<br>At least once a week<br>Less than once a month<br>One to three times a month                             | 1.18<br>1.36<br>1.31         | 1.00<br>1.00<br>1.00         |
| Year of birth (age group)                                                                | (Ref: 1998-2005; current age: 18-24)<br>1943 or earlier (current age: 80+ years)<br>1943-1953 (current age: 70-79 years) | 1.25<br>1.28                 | 1.00<br>1.00                 |

| Variable                                                    | Category                                  | E-value for Estimate | E-value for 95% CI |
|-------------------------------------------------------------|-------------------------------------------|----------------------|--------------------|
|                                                             | 1953-1963 (current age: 60-69 years)      | 1.52                 | 1.18               |
|                                                             | 1963-1973 (current age: 50-59 years)      | 1.08                 | 1.00               |
|                                                             | 1973-1983 (current age: 40-49 years)      | 1.07                 | 1.00               |
|                                                             | 1983-1993 (current age: 30-39 years)      | 1.09                 | 1.00               |
|                                                             | 1993-1998 (current age: 25-29 years)      | 1.02                 | 1.00               |
| Religion when twelve years old                              | (Ref: Christianity)                       |                      |                    |
|                                                             | Collapsed affiliations with prevalence<3% | 1.25                 | 1.00               |
|                                                             | Islam                                     | 1.14                 | 1.00               |
| Race plurality (prominent race/ethnic group [0] or not [1]) | (Ref: Plurality group)                    |                      |                    |
|                                                             | Non-plurality groups                      | 1.22                 | 1.00               |

**Table S15a. Philippines: Demographic descriptive statistics**  
**Characteristic**

**N = 3,448<sup>1</sup>**

|                                          |              |
|------------------------------------------|--------------|
| <b>Age group</b>                         |              |
| 1943 or earlier (current age: 80+ years) | 14 (0.4%)    |
| 1943-1953 (current age: 70-79 years)     | 87 (2.5%)    |
| 1953-1963 (current age: 60-69 years)     | 309 (9.0%)   |
| 1963-1973 (current age: 50-59 years)     | 454 (13%)    |
| 1973-1983 (current age: 40-49 years)     | 618 (18%)    |
| 1983-1993 (current age: 30-39 years)     | 773 (22%)    |
| 1993-1998 (current age: 25-29 years)     | 424 (12%)    |
| 1998-2005 (current age: 18-24 years)     | 770 (22%)    |
| (Missing)                                | 0 (0%)       |
| <b>Gender</b>                            |              |
| 1. Male                                  | 1,651 (48%)  |
| 2. Female                                | 1,786 (52%)  |
| 3. Other                                 | 8 (0.2%)     |
| (Missing)                                | 3 (<0.1%)    |
| <b>Marital status</b>                    |              |
| 1. Single/Never been married             | 827 (24%)    |
| 2. Married                               | 1,526 (44%)  |
| 3. Separated                             | 165 (4.8%)   |
| 4. Divorced                              | 7 (0.2%)     |
| 5. Widowed                               | 166 (4.8%)   |
| 6. Domestic partner                      | 747 (22%)    |
| (Missing)                                | 10 (0.3%)    |
| <b>Employment</b>                        |              |
| 1. Employed for an employer              | 877 (25%)    |
| 2. Self-employed                         | 842 (24%)    |
| 3. Retired                               | 100 (2.9%)   |
| 4. Student                               | 415 (12%)    |
| 5. Homemaker                             | 714 (21%)    |
| 6. Unemployed and looking for a job      | 428 (12%)    |
| 7. None of these/Other                   | 72 (2.1%)    |
| (Missing)                                | 0 (0%)       |
| <b>Religious service attendance</b>      |              |
| 1. More than once a week                 | 550 (16%)    |
| 2. Once a week                           | 1,270 (37%)  |
| 3. One to three times a month            | 881 (26%)    |
| 4. A few times a year                    | 609 (18%)    |
| 5. Never                                 | 137 (4.0%)   |
| (Missing)                                | 0 (0%)       |
| <b>Education</b>                         |              |
| 1. Up to 8                               | 824 (24%)    |
| 2. 9-15                                  | 2,404 (70%)  |
| 3. 16+                                   | 219 (6.4%)   |
| (Missing)                                | 0 (0%)       |
| <b>Immigration</b>                       |              |
| 1. Born in this country                  | 3,445 (100%) |
| 2. Born in another country               | 3 (<0.1%)    |

| <b>Characteristic</b>                                       | <b>N = 3,448<sup>1</sup></b> |
|-------------------------------------------------------------|------------------------------|
| (Missing)                                                   | 0 (0%)                       |
| <b>Religious affiliation</b>                                |                              |
| 1. Christianity                                             | 3,170 (92%)                  |
| 10. Taoism                                                  | 0 (0%)                       |
| 11. Confucianism                                            | 0 (0%)                       |
| 12. Primal, Animist, or Folk religion                       | 1 (<0.1%)                    |
| 13. Spiritism                                               | 0 (0%)                       |
| 14. Umbanda, Candomblé, and other African-derived religions | 0 (0%)                       |
| 15. Chinese folk/traditional religion                       | 0 (0%)                       |
| 2. Islam                                                    | 224 (6.5%)                   |
| 3. Hinduism                                                 | 0 (0%)                       |
| 4. Buddhism                                                 | 3 (<0.1%)                    |
| 5. Judaism                                                  | 4 (0.1%)                     |
| 6. Sikhism                                                  | 0 (0%)                       |
| 7. Baha'i                                                   | 1 (<0.1%)                    |
| 8. Jainism                                                  | 0 (0%)                       |
| 9. Shinto                                                   | 0 (0%)                       |
| 96. Some other religion                                     | 19 (0.5%)                    |
| 97. No religion/Atheist/Agnostic                            | 19 (0.5%)                    |
| (Missing)                                                   | 6 (0.2%)                     |
| <b>RACE ETHNICITY</b>                                       |                              |
| (Missing)                                                   | 1 (<0.1%)                    |
| 1301. Philippines: Tagalog                                  | 1,111 (32%)                  |
| 1302. Philippines: Cebuano                                  | 413 (12%)                    |
| 1303. Philippines: Ilocano/Ilokano                          | 299 (8.7%)                   |
| 1304. Philippines: Visayan/Bisaya                           | 430 (12%)                    |
| 1305. Philippines: Ilonggo/Hiligaynon                       | 289 (8.4%)                   |
| 1306. Philippines: Bicolano/Bikolano                        | 191 (5.5%)                   |
| 1307. Philippines: Waray                                    | 151 (4.4%)                   |
| 1308. Philippines: Tausug                                   | 69 (2.0%)                    |
| 1309. Philippines: Maranao                                  | 34 (1.0%)                    |
| 1310. Philippines: Maguindanaoan                            | 65 (1.9%)                    |
| 1311. Philippines: Chinese-Filipino                         | 4 (0.1%)                     |
| 1312. Philippines: Kapampangan                              | 70 (2.0%)                    |
| 1313. Philippines: Pangasinense                             | 69 (2.0%)                    |
| 1314. Philippines: Zamboangueno                             | 30 (0.9%)                    |
| 1316. Philippines: Masbateno                                | 32 (0.9%)                    |
| 1317. Philippines: Aeta                                     | 0 (<0.1%)                    |
| 1318. Philippines: Igorot                                   | 29 (0.8%)                    |
| 1320. Philippines: Badjao                                   | 1 (<0.1%)                    |
| 9996. Other                                                 | 160 (4.6%)                   |

<sup>1</sup>n (%)

**Table S15b. Philippines: Childhood descriptive statistics**

| <b>Characteristic</b>                      | <b>N = 3,448<sup>1</sup></b> |
|--------------------------------------------|------------------------------|
| <b>Age</b>                                 | 39 (15)                      |
| <b>Year of birth</b>                       |                              |
| 1943 or earlier (current age: 80+ years)   | 14 (0.4%)                    |
| 1943-1953 (current age: 70-79 years)       | 87 (2.5%)                    |
| 1953-1963 (current age: 60-69 years)       | 309 (9.0%)                   |
| 1963-1973 (current age: 50-59 years)       | 454 (13%)                    |
| 1973-1983 (current age: 40-49 years)       | 618 (18%)                    |
| 1983-1993 (current age: 30-39 years)       | 773 (22%)                    |
| 1993-1998 (current age: 25-29 years)       | 424 (12%)                    |
| 1998-2005 (current age: 18-24 years)       | 770 (22%)                    |
| (Missing)                                  | 0 (0%)                       |
| <b>Gender</b>                              |                              |
| 1. Male                                    | 1,651 (48%)                  |
| 2. Female                                  | 1,786 (52%)                  |
| 3. Other                                   | 8 (0.2%)                     |
| (Missing)                                  | 3 (<0.1%)                    |
| <b>Parent marital status</b>               |                              |
| 1. Parents were married                    | 2,999 (87%)                  |
| 2. Parents were divorced                   | 37 (1.1%)                    |
| 3. Parents were never married              | 336 (9.7%)                   |
| 4. One or both of them had died            | 35 (1.0%)                    |
| 5. Unsure                                  | 25 (0.7%)                    |
| (Missing)                                  | 17 (0.5%)                    |
| <b>Age 12 religious service attendance</b> |                              |
| 1. At least once a week                    | 1,602 (46%)                  |
| 2. One to three times a month              | 1,101 (32%)                  |
| 3. Less than once a month                  | 572 (17%)                    |
| 4. Never                                   | 137 (4.0%)                   |
| (Missing)                                  | 37 (1.1%)                    |
| <b>Relationship with mother</b>            |                              |
| 1. Very good                               | 2,166 (63%)                  |
| 2. Somewhat good                           | 1,114 (32%)                  |
| 3. Somewhat bad                            | 86 (2.5%)                    |
| 4. Very bad                                | 25 (0.7%)                    |
| 97. (Does not apply)                       | 36 (1.0%)                    |
| (Missing)                                  | 21 (0.6%)                    |
| <b>Relationship with father</b>            |                              |
| 1. Very good                               | 2,234 (65%)                  |
| 2. Somewhat good                           | 916 (27%)                    |
| 3. Somewhat bad                            | 111 (3.2%)                   |
| 4. Very bad                                | 39 (1.1%)                    |
| 97. (Does not apply)                       | 77 (2.2%)                    |
| (Missing)                                  | 70 (2.0%)                    |
| <b>Outsider growing up</b>                 |                              |
| 1. Yes                                     | 262 (7.6%)                   |
| 2. No                                      | 3,177 (92%)                  |
| (Missing)                                  | 9 (0.3%)                     |

| Characteristic                                              | N = 3,448 <sup>1</sup> |
|-------------------------------------------------------------|------------------------|
| <b>Abuse</b>                                                |                        |
| 1. Yes                                                      | 284 (8.2%)             |
| 2. No                                                       | 3,163 (92%)            |
| (Missing)                                                   | 0 (<0.1%)              |
| <b>Self-rated health growing up</b>                         |                        |
| 1. Excellent                                                | 644 (19%)              |
| 2. Very good                                                | 359 (10%)              |
| 3. Good                                                     | 1,448 (42%)            |
| 4. Fair                                                     | 817 (24%)              |
| 5. Poor                                                     | 179 (5.2%)             |
| (Missing)                                                   | 0 (0%)                 |
| <b>Immigration status</b>                                   |                        |
| 1. Born in this country                                     | 3,445 (100%)           |
| 2. Born in another country                                  | 3 (<0.1%)              |
| (Missing)                                                   | 0 (0%)                 |
| <b>Subjective financial status of family growing up</b>     |                        |
| 1. Lived comfortably                                        | 601 (17%)              |
| 2. Got by                                                   | 1,929 (56%)            |
| 3. Found it difficult                                       | 711 (21%)              |
| 4. Found it very difficult                                  | 206 (6.0%)             |
| (Missing)                                                   | 1 (<0.1%)              |
| <b>Religious affiliation</b>                                |                        |
| 1. Christianity                                             | 3,211 (93%)            |
| 10. Taoism                                                  | 0 (0%)                 |
| 11. Confucianism                                            | 0 (0%)                 |
| 12. Primal, Animist, or Folk religion                       | 3 (<0.1%)              |
| 13. Spiritism                                               | 0 (0%)                 |
| 14. Umbanda, Candomblé, and other African-derived religions | 0 (0%)                 |
| 15. Chinese folk/traditional religion                       | 0 (0%)                 |
| 2. Islam                                                    | 206 (6.0%)             |
| 3. Hinduism                                                 | 0 (0%)                 |
| 4. Buddhism                                                 | 1 (<0.1%)              |
| 5. Judaism                                                  | 0 (0%)                 |
| 6. Sikhism                                                  | 4 (0.1%)               |
| 7. Baha'i                                                   | 1 (<0.1%)              |
| 8. Jainism                                                  | 0 (0%)                 |
| 9. Shinto                                                   | 0 (0%)                 |
| 96. Some other religion                                     | 6 (0.2%)               |
| 97. No religion/Atheist/Agnostic                            | 6 (0.2%)               |
| (Missing)                                                   | 10 (0.3%)              |
| <b>Race/Ethnicity</b>                                       |                        |
| (Missing)                                                   | 1 (<0.1%)              |
| 1301. Philippines: Tagalog                                  | 1,111 (32%)            |
| 1302. Philippines: Cebuano                                  | 413 (12%)              |
| 1303. Philippines: Ilocano/Ilokano                          | 299 (8.7%)             |
| 1304. Philippines: Visayan/Bisaya                           | 430 (12%)              |
| 1305. Philippines: Ilonggo/Hiligaynon                       | 289 (8.4%)             |

| <b>Characteristic</b>                | <b>N = 3,448<sup>1</sup></b> |
|--------------------------------------|------------------------------|
| 1306. Philippines: Bicolano/Bikolano | 191 (5.5%)                   |
| 1307. Philippines: Waray             | 151 (4.4%)                   |
| 1308. Philippines: Tausug            | 69 (2.0%)                    |
| 1309. Philippines: Maranao           | 34 (1.0%)                    |
| 1310. Philippines: Maguindanaoan     | 65 (1.9%)                    |
| 1311. Philippines: Chinese-Filipino  | 4 (0.1%)                     |
| 1312. Philippines: Kapampangan       | 70 (2.0%)                    |
| 1313. Philippines: Pangasinense      | 69 (2.0%)                    |
| 1314. Philippines: Zamboangueno      | 30 (0.9%)                    |
| 1316. Philippines: Masbateno         | 32 (0.9%)                    |
| 1317. Philippines: Aeta              | 0 (<0.1%)                    |
| 1318. Philippines: Igorot            | 29 (0.8%)                    |
| 1320. Philippines: Badjao            | 1 (<0.1%)                    |
| 9996. Other                          | 160 (4.6%)                   |

<sup>1</sup>Mean (SD); n (%)

**Table S15c. Philippines: Proportions by demographic category**

| Variable                     | Category                                 | Proportion | 95% CI         | SE    | p-value  |
|------------------------------|------------------------------------------|------------|----------------|-------|----------|
| Age group                    | 1998-2005 (current age: 18-24 years)     | 0.903      | (0.874, 0.932) | 0.015 | 4.26e-07 |
|                              | 1943 or earlier (current age: 80+ years) | 0.525      | (0.157, 0.894) | 0.136 |          |
|                              | 1943-1953 (current age: 70-79 years)     | 0.807      | (0.713, 0.900) | 0.047 |          |
|                              | 1953-1963 (current age: 60-69 years)     | 0.816      | (0.762, 0.870) | 0.028 |          |
|                              | 1963-1973 (current age: 50-59 years)     | 0.770      | (0.728, 0.812) | 0.021 |          |
|                              | 1973-1983 (current age: 40-49 years)     | 0.840      | (0.808, 0.872) | 0.016 |          |
|                              | 1983-1993 (current age: 30-39 years)     | 0.859      | (0.833, 0.885) | 0.013 |          |
|                              | 1993-1998 (current age: 25-29 years)     | 0.898      | (0.859, 0.938) | 0.020 |          |
|                              | Male                                     | 0.842      | (0.821, 0.863) | 0.011 |          |
|                              | Female                                   | 0.861      | (0.845, 0.878) | 0.009 |          |
| Gender                       | Other                                    | 0.836      | (0.469, 1.000) | 0.116 | 4.00e-01 |
|                              | Single/Never been married                | 0.881      | (0.850, 0.912) | 0.016 |          |
|                              | Divorced                                 | 1.000      | *              | *     |          |
| Marital status               | Domestic partner                         | 0.894      | (0.871, 0.917) | 0.012 | < 1e-16  |
|                              | Married                                  | 0.828      | (0.806, 0.849) | 0.011 |          |
|                              | Separated                                | 0.771      | (0.698, 0.844) | 0.037 |          |
|                              | Widowed                                  | 0.817      | (0.758, 0.877) | 0.030 |          |
|                              | Employed for an employer                 | 0.849      | (0.822, 0.876) | 0.014 |          |
|                              | Homemaker                                | 0.831      | (0.803, 0.859) | 0.014 |          |
|                              | None of these/Other                      | 0.808      | (0.695, 0.920) | 0.056 |          |
| Employment                   | Retired                                  | 0.832      | (0.736, 0.927) | 0.048 | 5.68e-03 |
|                              | Self-employed                            | 0.857      | (0.829, 0.884) | 0.014 |          |
|                              | Student                                  | 0.920      | (0.886, 0.955) | 0.017 |          |
|                              | Unemployed and looking for a job         | 0.830      | (0.782, 0.879) | 0.025 |          |
|                              | Never                                    | 0.850      | (0.773, 0.927) | 0.039 |          |
|                              | A few times a year                       | 0.838      | (0.803, 0.873) | 0.018 |          |
|                              | More than once a week                    | 0.833      | (0.798, 0.868) | 0.018 |          |
| Religious service attendance | Once a week                              | 0.862      | (0.841, 0.884) | 0.011 | 5.93e-01 |
|                              | One to three times a month               | 0.859      | (0.832, 0.886) | 0.014 |          |
|                              | 9-15                                     | 0.869      | (0.853, 0.884) | 0.008 |          |
|                              | 16+                                      | 0.895      | (0.851, 0.938) | 0.022 |          |
| Education                    |                                          |            |                |       | 5.69e-05 |

| Variable                 | Category                                                          | Proportion | 95% CI         | SE    | p-value  |
|--------------------------|-------------------------------------------------------------------|------------|----------------|-------|----------|
| Immigration status       | Up to 8<br>Born in this<br>country                                | 0.792      | (0.760, 0.824) | 0.016 | 6.19e-01 |
|                          | Born in another<br>country                                        | 0.852      | (0.839, 0.865) | 0.007 |          |
|                          | No<br>religion/Atheist/Ag<br>nostic                               | 0.726      | *              | *     |          |
| Religious<br>affiliation | Christianity                                                      | *          | *              | *     | 3.28e-03 |
|                          | Combined                                                          | 0.851      | (0.837, 0.865) | 0.007 |          |
|                          | Spiritism                                                         | 0.952      | (0.894, 1.000) | 0.029 |          |
|                          | Umbanda,<br>Candomblé, and<br>other African-<br>derived religions | *          | *              | *     |          |
|                          | Buddhism                                                          | *          | *              | *     |          |
|                          | Islam                                                             | 0.849      | (0.804, 0.893) | 0.023 |          |
|                          | Chinese<br>folk/traditional<br>religion                           | *          | *              | *     |          |
|                          | Hinduism                                                          | *          | *              | *     |          |
|                          | Judaism                                                           | *          | *              | *     |          |
|                          | Primal, Animist, or<br>Folk religion                              | *          | *              | *     |          |

**Table S15d. Philippines: Childhood predictors regression analysis**

| Variable                                                        | Category                     | Risk-Ratio | logRR SE | RR 95% CI   | Global p-value |
|-----------------------------------------------------------------|------------------------------|------------|----------|-------------|----------------|
| Relationship with your mother growing up                        | (Ref: Very bad/somewhat bad) |            |          |             | 0.378          |
|                                                                 | Very good/somewhat good      | 1.038      | 0.039    | (0.96,1.12) |                |
| Relationship with your father growing up                        | (Ref: Very bad/somewhat bad) |            |          |             | 0.187          |
|                                                                 | Very good/somewhat good      | 1.047      | 0.032    | (0.98,1.11) |                |
| Parents married to each other when you were around 12 years old | (Ref: Parents married)       |            |          |             | 6.25e-06       |
|                                                                 | One or both of them had died | 0.928      | 0.073    | (0.80,1.07) |                |
|                                                                 | Parents were divorced        | 0.927      | 0.082    | (0.79,1.09) |                |
|                                                                 | Parents were never married   | 1.030      | 0.021    | (0.99,1.07) |                |
|                                                                 | Unsure                       | 1.117      | 0.023    | (1.07,1.17) |                |
| Feelings about familys household income when growing up         | (Ref: Got by)                |            |          |             | 0.325          |
|                                                                 | Found it difficult           | 0.965      | 0.022    | (0.93,1.01) |                |
|                                                                 | Found it very difficult      | 0.971      | 0.033    | (0.91,1.04) |                |
|                                                                 | Lived comfortably            | 1.011      | 0.019    | (0.98,1.05) |                |
| Physically or sexually abused when growing up                   | (Ref: No)                    |            |          |             | 0.380          |
|                                                                 |                              | 0.972      | 0.031    | (0.92,1.03) |                |
| Felt like an outsider in your family when growing up            | (Ref: No)                    |            |          |             | 0.043          |
|                                                                 | Yes                          | 1.048      | 0.022    | (1.00,1.09) |                |
| Your health when growing up                                     | (Ref: Good)                  |            |          |             | 0.076          |
|                                                                 | Excellent                    | 1.020      | 0.018    | (0.98,1.06) |                |
|                                                                 | Fair                         | 0.964      | 0.020    | (0.93,1.00) |                |
|                                                                 | Poor                         | 0.911      | 0.041    | (0.84,0.99) |                |
| Born in This                                                    | Very good                    | 1.022      | 0.022    | (0.98,1.07) | 0.446          |
|                                                                 | (Ref: Born in this           |            |          |             |                |

| Variable                                                                                  | Category                                  | Risk-Ratio | logRR SE | RR 95% CI   | Global p-value |
|-------------------------------------------------------------------------------------------|-------------------------------------------|------------|----------|-------------|----------------|
| country                                                                                   | country)                                  |            |          |             |                |
|                                                                                           | Born in another country                   | 0.824      | 0.256    | (0.50,1.36) |                |
| How Often You Attended Religious Services or Worshipped When You Were Around 12 Years Old | (Ref: Never)                              |            |          |             | 0.324          |
|                                                                                           | At least once a week                      | 0.981      | 0.035    | (0.92,1.05) |                |
|                                                                                           | Less than once a month                    | 0.939      | 0.038    | (0.87,1.01) |                |
|                                                                                           | One to three times a month                | 0.976      | 0.034    | (0.91,1.04) |                |
| Year of birth (age group)                                                                 | (Ref: 1998-2005; current age: 18-24)      |            |          |             | 3.27e-04       |
|                                                                                           | 1943 or earlier (current age: 80+ years)  | 0.707      | 0.132    | (0.55,0.92) |                |
|                                                                                           | 1943-1953 (current age: 70-79 years)      | 0.920      | 0.048    | (0.84,1.01) |                |
|                                                                                           | 1953-1963 (current age: 60-69 years)      | 0.935      | 0.030    | (0.88,0.99) |                |
|                                                                                           | 1963-1973 (current age: 50-59 years)      | 0.894      | 0.027    | (0.85,0.94) |                |
|                                                                                           | 1973-1983 (current age: 40-49 years)      | 0.953      | 0.023    | (0.91,1.00) |                |
|                                                                                           | 1983-1993 (current age: 30-39 years)      | 0.966      | 0.021    | (0.93,1.01) |                |
|                                                                                           | 1993-1998 (current age: 25-29 years)      | 0.996      | 0.025    | (0.95,1.04) |                |
| Religion when twelve years old                                                            | (Ref: Christianity)                       |            |          |             | 7.55e-15       |
|                                                                                           | Collapsed affiliations with prevalence<3% | 1.185      | 0.021    | (1.14,1.24) |                |
|                                                                                           | Islam                                     | 1.001      | 0.025    | (0.95,1.05) |                |
| Race plurality (prominent race/ethnic group [0] or not [1])                               | (Ref: Plurality group)                    |            |          |             | 0.139          |
|                                                                                           | Non-plurality groups                      | 0.975      | 0.016    | (0.95,1.01) |                |

**Table S15e. Philippines: Sensitivity to unmeasured confounding of childhood predictors**

| Variable                                                                                  | Category                                 | E-value for Estimate | E-value for 95% CI |
|-------------------------------------------------------------------------------------------|------------------------------------------|----------------------|--------------------|
| Relationship with your mother growing up                                                  | (Ref: Very bad/somewhat bad)             |                      |                    |
|                                                                                           | Very good/somewhat good                  | 1.24                 | 1.00               |
| Relationship with your father growing up                                                  | (Ref: Very bad/somewhat bad)             |                      |                    |
|                                                                                           | Very good/somewhat good                  | 1.27                 | 1.00               |
| Parents married to each other when you were around 12 years old                           | (Ref: Parents married)                   |                      |                    |
|                                                                                           | One or both of them had died             | 1.37                 | 1.00               |
|                                                                                           | Parents were divorced                    | 1.37                 | 1.00               |
|                                                                                           | Parents were never married               | 1.21                 | 1.00               |
|                                                                                           | Unsure                                   | 1.48                 | 1.34               |
| Feelings about family household income when growing up                                    | (Ref: Got by)                            |                      |                    |
|                                                                                           | Found it difficult                       | 1.23                 | 1.00               |
|                                                                                           | Found it very difficult                  | 1.20                 | 1.00               |
|                                                                                           | Lived comfortably                        | 1.12                 | 1.00               |
| Physically or sexually abused when growing up                                             | (Ref: No)                                |                      |                    |
|                                                                                           |                                          | 1.20                 | 1.00               |
| Felt like an outsider in your family when growing up                                      | (Ref: No)                                |                      |                    |
|                                                                                           | Yes                                      | 1.27                 | 1.05               |
| Your health when growing up                                                               | (Ref: Good)                              |                      |                    |
|                                                                                           | Excellent                                | 1.16                 | 1.00               |
|                                                                                           | Fair                                     | 1.24                 | 1.00               |
|                                                                                           | Poor                                     | 1.43                 | 1.13               |
|                                                                                           | Very good                                | 1.17                 | 1.00               |
| Born in This country                                                                      | (Ref: Born in this country)              |                      |                    |
|                                                                                           | Born in another country                  | 1.72                 | 1.00               |
| How Often You Attended Religious Services or Worshipped When You Were Around 12 Years Old | (Ref: Never)                             |                      |                    |
|                                                                                           | At least once a week                     | 1.16                 | 1.00               |
|                                                                                           | Less than once a month                   | 1.33                 | 1.00               |
|                                                                                           | One to three times a month               | 1.18                 | 1.00               |
| Year of birth (age group)                                                                 | (Ref: 1998-2005; current age: 18-24)     |                      |                    |
|                                                                                           | 1943 or earlier (current age: 80+ years) | 2.18                 | 1.41               |
|                                                                                           | 1943-1953 (current age: 70-79 years)     | 1.39                 | 1.00               |

| Variable                                                    | Category                                  | E-value for Estimate | E-value for 95% CI |
|-------------------------------------------------------------|-------------------------------------------|----------------------|--------------------|
|                                                             | 1953-1963 (current age: 60-69 years)      | 1.34                 | 1.10               |
|                                                             | 1963-1973 (current age: 50-59 years)      | 1.48                 | 1.31               |
|                                                             | 1973-1983 (current age: 40-49 years)      | 1.28                 | 1.06               |
|                                                             | 1983-1993 (current age: 30-39 years)      | 1.22                 | 1.00               |
|                                                             | 1993-1998 (current age: 25-29 years)      | 1.07                 | 1.00               |
| Religion when twelve years old                              | (Ref: Christianity)                       |                      |                    |
|                                                             | Collapsed affiliations with prevalence<3% | 1.65                 | 1.53               |
|                                                             | Islam                                     | 1.03                 | 1.00               |
| Race plurality (prominent race/ethnic group [0] or not [1]) | (Ref: Plurality group)                    |                      |                    |
|                                                             | Non-plurality groups                      | 1.19                 | 1.00               |

**Table S16a. Poland: Demographic descriptive statistics**

| <b>Characteristic</b>                    | <b>N = 4,316<sup>1</sup></b> |
|------------------------------------------|------------------------------|
| <b>Age group</b>                         |                              |
| 1943 or earlier (current age: 80+ years) | 44 (1.0%)                    |
| 1943-1953 (current age: 70-79 years)     | 319 (7.4%)                   |
| 1953-1963 (current age: 60-69 years)     | 859 (20%)                    |
| 1963-1973 (current age: 50-59 years)     | 654 (15%)                    |
| 1973-1983 (current age: 40-49 years)     | 792 (18%)                    |
| 1983-1993 (current age: 30-39 years)     | 862 (20%)                    |
| 1993-1998 (current age: 25-29 years)     | 330 (7.7%)                   |
| 1998-2005 (current age: 18-24 years)     | 455 (11%)                    |
| (Missing)                                | 0 (<0.1%)                    |
| <b>Gender</b>                            |                              |
| 1. Male                                  | 2,024 (47%)                  |
| 2. Female                                | 2,276 (53%)                  |
| 3. Other                                 | 4 (<0.1%)                    |
| (Missing)                                | 11 (0.3%)                    |
| <b>Marital status</b>                    |                              |
| 1. Single/Never been married             | 849 (20%)                    |
| 2. Married                               | 2,572 (60%)                  |
| 3. Separated                             | 32 (0.7%)                    |
| 4. Divorced                              | 205 (4.7%)                   |
| 5. Widowed                               | 400 (9.3%)                   |
| 6. Domestic partner                      | 204 (4.7%)                   |
| (Missing)                                | 55 (1.3%)                    |
| <b>Employment</b>                        |                              |
| 1. Employed for an employer              | 2,397 (56%)                  |
| 2. Self-employed                         | 232 (5.4%)                   |
| 3. Retired                               | 1,074 (25%)                  |
| 4. Student                               | 244 (5.7%)                   |
| 5. Homemaker                             | 165 (3.8%)                   |
| 6. Unemployed and looking for a job      | 144 (3.3%)                   |
| 7. None of these/Other                   | 48 (1.1%)                    |
| (Missing)                                | 12 (0.3%)                    |
| <b>Religious service attendance</b>      |                              |
| 1. More than once a week                 | 122 (2.8%)                   |
| 2. Once a week                           | 1,578 (37%)                  |
| 3. One to three times a month            | 895 (21%)                    |
| 4. A few times a year                    | 1,079 (25%)                  |
| 5. Never                                 | 622 (14%)                    |
| (Missing)                                | 20 (0.5%)                    |
| <b>Education</b>                         |                              |
| 1. Up to 8                               | 328 (7.6%)                   |
| 2. 9-15                                  | 2,777 (64%)                  |
| 3. 16+                                   | 1,211 (28%)                  |
| (Missing)                                | 0 (0%)                       |
| <b>Immigration</b>                       |                              |
| 1. Born in this country                  | 4,287 (99%)                  |
| 2. Born in another country               | 27 (0.6%)                    |

| <b>Characteristic</b>                                       | <b>N = 4,316<sup>1</sup></b> |
|-------------------------------------------------------------|------------------------------|
| (Missing)                                                   | 1 (<0.1%)                    |
| <b>Religious affiliation</b>                                |                              |
| 1. Christianity                                             | 3,867 (90%)                  |
| 10. Taoism                                                  | 0 (0%)                       |
| 11. Confucianism                                            | 0 (0%)                       |
| 12. Primal, Animist, or Folk religion                       | 2 (<0.1%)                    |
| 13. Spiritism                                               | 0 (0%)                       |
| 14. Umbanda, Candomblé, and other African-derived religions | 0 (0%)                       |
| 15. Chinese folk/traditional religion                       | 0 (0%)                       |
| 2. Islam                                                    | 1 (<0.1%)                    |
| 3. Hinduism                                                 | 0 (0%)                       |
| 4. Buddhism                                                 | 1 (<0.1%)                    |
| 5. Judaism                                                  | 0 (0%)                       |
| 6. Sikhism                                                  | 1 (<0.1%)                    |
| 7. Baha'i                                                   | 0 (0%)                       |
| 8. Jainism                                                  | 0 (0%)                       |
| 9. Shinto                                                   | 0 (0%)                       |
| 96. Some other religion                                     | 0 (0%)                       |
| 97. No religion/Atheist/Agnostic                            | 426 (9.9%)                   |
| (Missing)                                                   | 17 (0.4%)                    |
| <b>RACE ETHNICITY</b>                                       |                              |
| (Missing)                                                   | 2 (<0.1%)                    |
| 1401. Poland: Polish                                        | 4,295 (100%)                 |
| 1402. Poland: German                                        | 1 (<0.1%)                    |
| 1403. Poland: Belarussian                                   | 2 (<0.1%)                    |
| 1404. Poland: Ukrainian                                     | 7 (0.2%)                     |
| 1409. Poland: Silesia                                       | 7 (0.2%)                     |
| 9996. Other                                                 | 1 (<0.1%)                    |

<sup>1</sup>n (%)

**Table S16b. Poland: Childhood descriptive statistics**

| <b>Characteristic</b>                      | <b>N = 4,316<sup>1</sup></b> |
|--------------------------------------------|------------------------------|
| <b>Age</b>                                 | 47 (17)                      |
| <b>Year of birth</b>                       |                              |
| 1943 or earlier (current age: 80+ years)   | 44 (1.0%)                    |
| 1943-1953 (current age: 70-79 years)       | 319 (7.4%)                   |
| 1953-1963 (current age: 60-69 years)       | 859 (20%)                    |
| 1963-1973 (current age: 50-59 years)       | 654 (15%)                    |
| 1973-1983 (current age: 40-49 years)       | 792 (18%)                    |
| 1983-1993 (current age: 30-39 years)       | 862 (20%)                    |
| 1993-1998 (current age: 25-29 years)       | 330 (7.7%)                   |
| 1998-2005 (current age: 18-24 years)       | 455 (11%)                    |
| (Missing)                                  | 0 (<0.1%)                    |
| <b>Gender</b>                              |                              |
| 1. Male                                    | 2,024 (47%)                  |
| 2. Female                                  | 2,276 (53%)                  |
| 3. Other                                   | 4 (<0.1%)                    |
| (Missing)                                  | 11 (0.3%)                    |
| <b>Parent marital status</b>               |                              |
| 1. Parents were married                    | 3,915 (91%)                  |
| 2. Parents were divorced                   | 219 (5.1%)                   |
| 3. Parents were never married              | 54 (1.3%)                    |
| 4. One or both of them had died            | 86 (2.0%)                    |
| 5. Unsure                                  | 35 (0.8%)                    |
| (Missing)                                  | 7 (0.2%)                     |
| <b>Age 12 religious service attendance</b> |                              |
| 1. At least once a week                    | 2,108 (49%)                  |
| 2. One to three times a month              | 1,106 (26%)                  |
| 3. Less than once a month                  | 796 (18%)                    |
| 4. Never                                   | 123 (2.9%)                   |
| (Missing)                                  | 183 (4.2%)                   |
| <b>Relationship with mother</b>            |                              |
| 1. Very good                               | 2,205 (51%)                  |
| 2. Somewhat good                           | 1,962 (45%)                  |
| 3. Somewhat bad                            | 92 (2.1%)                    |
| 4. Very bad                                | 15 (0.4%)                    |
| 97. (Does not apply)                       | 14 (0.3%)                    |
| (Missing)                                  | 28 (0.6%)                    |
| <b>Relationship with father</b>            |                              |
| 1. Very good                               | 1,879 (44%)                  |
| 2. Somewhat good                           | 2,029 (47%)                  |
| 3. Somewhat bad                            | 181 (4.2%)                   |
| 4. Very bad                                | 30 (0.7%)                    |
| 97. (Does not apply)                       | 144 (3.3%)                   |
| (Missing)                                  | 53 (1.2%)                    |
| <b>Outsider growing up</b>                 |                              |
| 1. Yes                                     | 186 (4.3%)                   |
| 2. No                                      | 4,067 (94%)                  |
| (Missing)                                  | 63 (1.5%)                    |

| Characteristic                                              | N = 4,316 <sup>1</sup> |
|-------------------------------------------------------------|------------------------|
| <b>Abuse</b>                                                |                        |
| 1. Yes                                                      | 130 (3.0%)             |
| 2. No                                                       | 4,171 (97%)            |
| (Missing)                                                   | 14 (0.3%)              |
| <b>Self-rated health growing up</b>                         |                        |
| 1. Excellent                                                | 1,392 (32%)            |
| 2. Very good                                                | 2,116 (49%)            |
| 3. Good                                                     | 614 (14%)              |
| 4. Fair                                                     | 139 (3.2%)             |
| 5. Poor                                                     | 50 (1.2%)              |
| (Missing)                                                   | 5 (0.1%)               |
| <b>Immigration status</b>                                   |                        |
| 1. Born in this country                                     | 4,287 (99%)            |
| 2. Born in another country                                  | 27 (0.6%)              |
| (Missing)                                                   | 1 (<0.1%)              |
| <b>Subjective financial status of family growing up</b>     |                        |
| 1. Lived comfortably                                        | 596 (14%)              |
| 2. Got by                                                   | 2,598 (60%)            |
| 3. Found it difficult                                       | 906 (21%)              |
| 4. Found it very difficult                                  | 199 (4.6%)             |
| (Missing)                                                   | 17 (0.4%)              |
| <b>Religious affiliation</b>                                |                        |
| 1. Christianity                                             | 4,111 (95%)            |
| 10. Taoism                                                  | 0 (0%)                 |
| 11. Confucianism                                            | 0 (0%)                 |
| 12. Primal, Animist, or Folk religion                       | 0 (0%)                 |
| 13. Spiritism                                               | 0 (0%)                 |
| 14. Umbanda, Candomblé, and other African-derived religions | 0 (0%)                 |
| 15. Chinese folk/traditional religion                       | 0 (0%)                 |
| 2. Islam                                                    | 0 (0%)                 |
| 3. Hinduism                                                 | 0 (0%)                 |
| 4. Buddhism                                                 | 0 (0%)                 |
| 5. Judaism                                                  | 0 (0%)                 |
| 6. Sikhism                                                  | 1 (<0.1%)              |
| 7. Baha'i                                                   | 0 (0%)                 |
| 8. Jainism                                                  | 0 (0%)                 |
| 9. Shinto                                                   | 0 (0%)                 |
| 96. Some other religion                                     | 0 (0%)                 |
| 97. No religion/Atheist/Agnostic                            | 197 (4.6%)             |
| (Missing)                                                   | 7 (0.2%)               |
| <b>Race/Ethnicity</b>                                       |                        |
| (Missing)                                                   | 2 (<0.1%)              |
| 1401. Poland: Polish                                        | 4,295 (100%)           |
| 1402. Poland: German                                        | 1 (<0.1%)              |
| 1403. Poland: Belarussian                                   | 2 (<0.1%)              |
| 1404. Poland: Ukrainian                                     | 7 (0.2%)               |
| 1409. Poland: Silesia                                       | 7 (0.2%)               |

| Characteristic                | N = 4,316 <sup>1</sup> |
|-------------------------------|------------------------|
| 9996. Other                   | 1 (<0.1%)              |
| <sup>1</sup> Mean (SD); n (%) |                        |

**Table S16c. Poland: Proportions by demographic category**

| Variable                     | Category                                 | Proportion | 95% CI         | SE    | p-value  |
|------------------------------|------------------------------------------|------------|----------------|-------|----------|
| Age group                    | 1998-2005 (current age: 18-24 years)     | 0.737      | (0.660, 0.814) | 0.039 | 3.01e-01 |
|                              | 1943 or earlier (current age: 80+ years) | 0.651      | (0.433, 0.868) | 0.107 |          |
|                              | 1943-1953 (current age: 70-79 years)     | 0.675      | (0.588, 0.761) | 0.044 |          |
|                              | 1953-1963 (current age: 60-69 years)     | 0.633      | (0.580, 0.686) | 0.027 |          |
|                              | 1963-1973 (current age: 50-59 years)     | 0.685      | (0.636, 0.733) | 0.025 |          |
|                              | 1973-1983 (current age: 40-49 years)     | 0.691      | (0.640, 0.742) | 0.026 |          |
|                              | 1983-1993 (current age: 30-39 years)     | 0.712      | (0.666, 0.758) | 0.023 |          |
|                              | 1993-1998 (current age: 25-29 years)     | 0.718      | (0.647, 0.790) | 0.036 |          |
|                              | Male                                     | 0.675      | (0.634, 0.715) | 0.021 |          |
|                              | Female                                   | 0.699      | (0.660, 0.738) | 0.020 |          |
| Gender                       | Other                                    | 1.000      | *              | *     | < 1e-16  |
| Marital status               | Single/Never been married                | 0.713      | (0.651, 0.775) | 0.032 |          |
|                              | Divorced                                 | 0.651      | (0.547, 0.754) | 0.052 |          |
|                              | Domestic partner                         | 0.647      | (0.539, 0.756) | 0.055 |          |
|                              | Married                                  | 0.685      | (0.650, 0.720) | 0.018 |          |
|                              | Separated                                | 0.666      | (0.474, 0.857) | 0.092 |          |
|                              | Widowed                                  | 0.697      | (0.623, 0.771) | 0.038 |          |
|                              | Employed for an employer                 | 0.709      | (0.673, 0.745) | 0.018 |          |
| Employment                   | Homemaker                                | 0.710      | (0.592, 0.828) | 0.060 | 1.82e-01 |
|                              | None of these/Other                      | 0.688      | (0.499, 0.877) | 0.093 |          |
|                              | Retired                                  | 0.641      | (0.587, 0.695) | 0.027 |          |
|                              | Self-employed                            | 0.686      | (0.615, 0.757) | 0.036 |          |
|                              | Student                                  | 0.726      | (0.628, 0.823) | 0.050 |          |
|                              | Unemployed and looking for a job         | 0.605      | (0.444, 0.765) | 0.081 |          |
|                              | Religious service attendance             |            |                |       |          |
| Religious service attendance | Never                                    | 0.675      | (0.597, 0.754) | 0.040 | 5.38e-01 |
|                              | A few times a year                       | 0.667      | (0.612, 0.722) | 0.028 |          |
|                              | More than once a week                    | 0.773      | (0.654, 0.891) | 0.060 |          |
|                              | Once a week                              | 0.709      | (0.656, 0.762) | 0.027 |          |
|                              | One to three times a month               | 0.674      | (0.629, 0.719) | 0.023 |          |
| Education                    | 9-15                                     | 0.666      | (0.629, 0.703) | 0.019 | 2.76e-03 |
|                              | 16+                                      | 0.737      | (0.697, 0.777) | 0.020 |          |

| Variable                 | Category                                                          | Proportion | 95% CI         | SE    | p-value  |
|--------------------------|-------------------------------------------------------------------|------------|----------------|-------|----------|
| Immigration status       | Up to 8<br>Born in this<br>country                                | 0.696      | (0.572, 0.820) | 0.063 | 8.66e-01 |
|                          | Born in another<br>country                                        | 0.688      | (0.654, 0.722) | 0.017 |          |
|                          | No                                                                | 0.705      | (0.484, 0.925) | 0.107 |          |
|                          | religion/Atheist/Ag<br>nostic                                     | 0.768      | (0.712, 0.823) | 0.028 |          |
| Religious<br>affiliation | Christianity                                                      | 0.679      | (0.643, 0.715) | 0.018 | 1.12e-02 |
|                          | Combined                                                          | 0.768      | (0.000, 1.000) | 0.164 |          |
|                          | Spiritism                                                         | *          | *              | *     |          |
|                          | Umbanda,<br>Candomblé, and<br>other African-<br>derived religions | *          | *              | *     |          |
|                          | Buddhism                                                          | *          | *              | *     |          |
|                          | Islam                                                             | *          | *              | *     |          |
|                          | Chinese<br>folk/traditional<br>religion                           | *          | *              | *     |          |
|                          | Hinduism                                                          | *          | *              | *     |          |
|                          | Judaism                                                           | *          | *              | *     |          |
|                          | Primal, Animist, or<br>Folk religion                              | *          | *              | *     |          |

**Table S16d. Poland: Childhood predictors regression analysis**

| Variable                                                        | Category                                                                                                                | Risk-Ratio                       | logRR SE                         | RR 95% CI                                                | Global p-value |
|-----------------------------------------------------------------|-------------------------------------------------------------------------------------------------------------------------|----------------------------------|----------------------------------|----------------------------------------------------------|----------------|
| Relationship with your mother growing up                        | (Ref: Very bad/somewhat bad)<br>Very good/somewhat good                                                                 | 0.916                            | 0.051                            | (0.83,1.01)                                              | 0.104          |
| Relationship with your father growing up                        | (Ref: Very bad/somewhat bad)<br>Very good/somewhat good                                                                 | 0.938                            | 0.043                            | (0.86,1.02)                                              | 0.168          |
| Parents married to each other when you were around 12 years old | (Ref: Parents married)<br>One or both of them had died<br>Parents were divorced<br>Parents were never married<br>Unsure | 0.952<br>0.930<br>0.947<br>0.979 | 0.076<br>0.041<br>0.097<br>0.097 | (0.82,1.11)<br>(0.86,1.01)<br>(0.78,1.14)<br>(0.81,1.18) | 0.348          |
| Feelings about familys household income when growing up         | (Ref: Got by)<br>Found it difficult<br>Found it very difficult<br>Lived comfortably                                     | 0.914<br>1.001<br>0.994          | 0.028<br>0.057<br>0.029          | (0.87,0.97)<br>(0.90,1.12)<br>(0.94,1.05)                | 0.004          |
| Physically or sexually abused when growing up                   | (Ref: No)                                                                                                               | 0.962                            | 0.059                            | (0.86,1.08)                                              | 0.477          |
| Felt like an outsider in your family when growing up            | (Ref: No)<br>Yes                                                                                                        | 0.955                            | 0.050                            | (0.87,1.05)                                              | 0.392          |
| Your health when growing up                                     | (Ref: Good)<br>Excellent<br>Fair<br>Poor<br>Very good                                                                   | 0.999<br>0.995<br>1.092<br>0.983 | 0.033<br>0.060<br>0.098<br>0.030 | (0.94,1.07)<br>(0.88,1.12)<br>(0.90,1.32)<br>(0.93,1.04) | 0.745          |
| Born in This                                                    | (Ref: Born in this                                                                                                      |                                  |                                  |                                                          | 0.580          |

| Variable                                                                                  | Category                                  | Risk-Ratio | logRR SE | RR 95% CI   | Global p-value |
|-------------------------------------------------------------------------------------------|-------------------------------------------|------------|----------|-------------|----------------|
| country                                                                                   | country)                                  |            |          |             |                |
|                                                                                           | Born in another country                   | 1.027      | 0.118    | (0.81,1.29) |                |
| How Often You Attended Religious Services or Worshipped When You Were Around 12 Years Old | (Ref: Never)                              |            |          |             | 0.404          |
|                                                                                           | At least once a week                      | 1.086      | 0.067    | (0.95,1.24) |                |
|                                                                                           | Less than once a month                    | 0.976      | 0.063    | (0.86,1.10) |                |
|                                                                                           | One to three times a month                | 1.086      | 0.063    | (0.96,1.23) |                |
| Year of birth (age group)                                                                 | (Ref: 1998-2005; current age: 18-24)      |            |          |             | 0.061          |
|                                                                                           | 1943 or earlier (current age: 80+ years)  | 0.924      | 0.108    | (0.75,1.14) |                |
|                                                                                           | 1943-1953 (current age: 70-79 years)      | 0.919      | 0.055    | (0.83,1.02) |                |
|                                                                                           | 1953-1963 (current age: 60-69 years)      | 0.895      | 0.042    | (0.82,0.97) |                |
|                                                                                           | 1963-1973 (current age: 50-59 years)      | 0.941      | 0.042    | (0.87,1.02) |                |
|                                                                                           | 1973-1983 (current age: 40-49 years)      | 0.947      | 0.038    | (0.88,1.02) |                |
|                                                                                           | 1983-1993 (current age: 30-39 years)      | 0.968      | 0.037    | (0.90,1.04) |                |
|                                                                                           | 1993-1998 (current age: 25-29 years)      | 0.969      | 0.042    | (0.89,1.05) |                |
| Religion when twelve years old                                                            | (Ref: No religion/Atheist/Agnostic)       |            |          |             | 1.76e-06       |
|                                                                                           | Christianity                              | 0.931      | 0.047    | (0.85,1.02) |                |
|                                                                                           | Collapsed affiliations with prevalence<3% | 0.528      | 0.119    | (0.42,0.67) |                |
| Race plurality (prominent race/ethnic group [0] or not [1])                               | (Ref: Plurality group)                    |            |          |             | 0.605          |
|                                                                                           | Non-plurality groups                      | 1.014      | 0.207    | (0.68,1.52) |                |

**Table S16e. Poland: Sensitivity to unmeasured confounding of childhood predictors**

| Variable                                                                                 | Category                                 | E-value for Estimate | E-value for 95% CI |
|------------------------------------------------------------------------------------------|------------------------------------------|----------------------|--------------------|
| Relationship with your mother growing up                                                 | (Ref: Very bad/somewhat bad)             |                      |                    |
|                                                                                          | Very good/somewhat good                  | 1.41                 | 1.00               |
| Relationship with your father growing up                                                 | (Ref: Very bad/somewhat bad)             |                      |                    |
|                                                                                          | Very good/somewhat good                  | 1.33                 | 1.00               |
| Parents married to each other when you were around 12 years old                          | (Ref: Parents married)                   |                      |                    |
|                                                                                          | One or both of them had died             | 1.28                 | 1.00               |
|                                                                                          | Parents were divorced                    | 1.36                 | 1.00               |
|                                                                                          | Parents were never married               | 1.30                 | 1.00               |
|                                                                                          | Unsure                                   | 1.17                 | 1.00               |
| Feelings about familys household income when growing up                                  | (Ref: Got by)                            |                      |                    |
|                                                                                          | Found it difficult                       | 1.41                 | 1.23               |
|                                                                                          | Found it very difficult                  | 1.03                 | 1.00               |
|                                                                                          | Lived comfortably                        | 1.08                 | 1.00               |
| Physically or sexually abused when growing up                                            | (Ref: No)                                |                      |                    |
|                                                                                          |                                          | 1.24                 | 1.00               |
| Felt like an outsider in your family when growing up                                     | (Ref: No)                                |                      |                    |
|                                                                                          | Yes                                      | 1.27                 | 1.00               |
| Your health when growing up                                                              | (Ref: Good)                              |                      |                    |
|                                                                                          | Excellent                                | 1.03                 | 1.00               |
|                                                                                          | Fair                                     | 1.08                 | 1.00               |
|                                                                                          | Poor                                     | 1.41                 | 1.00               |
|                                                                                          | Very good                                | 1.15                 | 1.00               |
| Born in This country                                                                     | (Ref: Born in this country)              |                      |                    |
|                                                                                          | Born in another country                  | 1.19                 | 1.00               |
| How Often You Attended Religious Services or Worshiped When You Were Around 12 Years Old | (Ref: Never)                             |                      |                    |
|                                                                                          | At least once a week                     | 1.39                 | 1.00               |
|                                                                                          | Less than once a month                   | 1.18                 | 1.00               |
|                                                                                          | One to three times a month               | 1.39                 | 1.00               |
| Year of birth (age group)                                                                | (Ref: 1998-2005; current age: 18-24)     |                      |                    |
|                                                                                          | 1943 or earlier (current age: 80+ years) | 1.38                 | 1.00               |
|                                                                                          | 1943-1953 (current age: 70-79 years)     | 1.40                 | 1.00               |

| Variable                                                    | Category                                  | E-value for Estimate | E-value for 95% CI |
|-------------------------------------------------------------|-------------------------------------------|----------------------|--------------------|
|                                                             | 1953-1963 (current age: 60-69 years)      | 1.48                 | 1.20               |
|                                                             | 1963-1973 (current age: 50-59 years)      | 1.32                 | 1.00               |
|                                                             | 1973-1983 (current age: 40-49 years)      | 1.30                 | 1.00               |
|                                                             | 1983-1993 (current age: 30-39 years)      | 1.22                 | 1.00               |
|                                                             | 1993-1998 (current age: 25-29 years)      | 1.22                 | 1.00               |
| Religion when twelve years old                              | (Ref: No religion/Atheist/Agnostic)       |                      |                    |
|                                                             | Christianity                              | 1.36                 | 1.00               |
|                                                             | Collapsed affiliations with prevalence<3% | 3.19                 | 2.35               |
| Race plurality (prominent race/ethnic group [0] or not [1]) | (Ref: Plurality group)                    |                      |                    |
|                                                             | Non-plurality groups                      | 1.13                 | 1.00               |

**Table S17a. South Africa: Demographic descriptive statistics**

| <b>Characteristic</b>                    | <b>N = 1,625<sup>1</sup></b> |
|------------------------------------------|------------------------------|
| <b>Age group</b>                         |                              |
| 1943 or earlier (current age: 80+ years) | 12 (0.7%)                    |
| 1943-1953 (current age: 70-79 years)     | 65 (4.0%)                    |
| 1953-1963 (current age: 60-69 years)     | 105 (6.5%)                   |
| 1963-1973 (current age: 50-59 years)     | 212 (13%)                    |
| 1973-1983 (current age: 40-49 years)     | 283 (17%)                    |
| 1983-1993 (current age: 30-39 years)     | 406 (25%)                    |
| 1993-1998 (current age: 25-29 years)     | 223 (14%)                    |
| 1998-2005 (current age: 18-24 years)     | 316 (19%)                    |
| (Missing)                                | 3 (0.2%)                     |
| <b>Gender</b>                            |                              |
| 1. Male                                  | 777 (48%)                    |
| 2. Female                                | 846 (52%)                    |
| 3. Other                                 | 0 (0%)                       |
| (Missing)                                | 2 (0.1%)                     |
| <b>Marital status</b>                    |                              |
| 1. Single/Never been married             | 984 (61%)                    |
| 2. Married                               | 331 (20%)                    |
| 3. Separated                             | 31 (1.9%)                    |
| 4. Divorced                              | 21 (1.3%)                    |
| 5. Widowed                               | 85 (5.2%)                    |
| 6. Domestic partner                      | 164 (10%)                    |
| (Missing)                                | 9 (0.6%)                     |
| <b>Employment</b>                        |                              |
| 1. Employed for an employer              | 329 (20%)                    |
| 2. Self-employed                         | 239 (15%)                    |
| 3. Retired                               | 123 (7.6%)                   |
| 4. Student                               | 123 (7.5%)                   |
| 5. Homemaker                             | 99 (6.1%)                    |
| 6. Unemployed and looking for a job      | 665 (41%)                    |
| 7. None of these/Other                   | 45 (2.8%)                    |
| (Missing)                                | 2 (0.1%)                     |
| <b>Religious service attendance</b>      |                              |
| 1. More than once a week                 | 280 (17%)                    |
| 2. Once a week                           | 551 (34%)                    |
| 3. One to three times a month            | 338 (21%)                    |
| 4. A few times a year                    | 244 (15%)                    |
| 5. Never                                 | 209 (13%)                    |
| (Missing)                                | 4 (0.2%)                     |
| <b>Education</b>                         |                              |
| 1. Up to 8                               | 419 (26%)                    |
| 2. 9-15                                  | 1,106 (68%)                  |
| 3. 16+                                   | 98 (6.0%)                    |
| (Missing)                                | 2 (0.1%)                     |
| <b>Immigration</b>                       |                              |
| 1. Born in this country                  | 1,536 (95%)                  |
| 2. Born in another country               | 89 (5.5%)                    |

| <b>Characteristic</b>                                       | <b>N = 1,625<sup>1</sup></b> |
|-------------------------------------------------------------|------------------------------|
| (Missing)                                                   | 0 (0%)                       |
| <b>Religious affiliation</b>                                |                              |
| 1. Christianity                                             | 1,337 (82%)                  |
| 10. Taoism                                                  | 1 (<0.1%)                    |
| 11. Confucianism                                            | 0 (0%)                       |
| 12. Primal, Animist, or Folk religion                       | 73 (4.5%)                    |
| 13. Spiritism                                               | 0 (0%)                       |
| 14. Umbanda, Candomblé, and other African-derived religions | 0 (0%)                       |
| 15. Chinese folk/traditional religion                       | 0 (0%)                       |
| 2. Islam                                                    | 33 (2.0%)                    |
| 3. Hinduism                                                 | 0 (0%)                       |
| 4. Buddhism                                                 | 9 (0.6%)                     |
| 5. Judaism                                                  | 0 (0%)                       |
| 6. Sikhism                                                  | 0 (0%)                       |
| 7. Baha'i                                                   | 0 (0%)                       |
| 8. Jainism                                                  | 3 (0.2%)                     |
| 9. Shinto                                                   | 2 (0.1%)                     |
| 96. Some other religion                                     | 1 (<0.1%)                    |
| 97. No religion/Atheist/Agnostic                            | 154 (9.5%)                   |
| (Missing)                                                   | 12 (0.7%)                    |
| <b>RACE ETHNICITY</b>                                       |                              |
| (Missing)                                                   | 3 (0.2%)                     |
| 1601. South Africa: Black                                   | 1,484 (91%)                  |
| 1602. South Africa: Asian/Indian                            | 2 (0.1%)                     |
| 1603. South Africa: Colored                                 | 127 (7.8%)                   |
| 1604. South Africa: White                                   | 8 (0.5%)                     |
| 9996. Other                                                 | 1 (<0.1%)                    |
| <sup>1</sup> n (%)                                          |                              |

**Table S17b. South Africa: Demographic descriptive statistics**

| <b>Characteristic</b>                      | <b>N = 1,625<sup>1</sup></b> |
|--------------------------------------------|------------------------------|
| <b>Age</b>                                 | 39 (15)                      |
| Unknown                                    | 3                            |
| <b>Year of birth</b>                       |                              |
| 1943 or earlier (current age: 80+ years)   | 12 (0.7%)                    |
| 1943-1953 (current age: 70-79 years)       | 65 (4.0%)                    |
| 1953-1963 (current age: 60-69 years)       | 105 (6.5%)                   |
| 1963-1973 (current age: 50-59 years)       | 212 (13%)                    |
| 1973-1983 (current age: 40-49 years)       | 283 (17%)                    |
| 1983-1993 (current age: 30-39 years)       | 406 (25%)                    |
| 1993-1998 (current age: 25-29 years)       | 223 (14%)                    |
| 1998-2005 (current age: 18-24 years)       | 316 (19%)                    |
| (Missing)                                  | 3 (0.2%)                     |
| <b>Gender</b>                              |                              |
| 1. Male                                    | 777 (48%)                    |
| 2. Female                                  | 846 (52%)                    |
| 3. Other                                   | 0 (0%)                       |
| (Missing)                                  | 2 (0.1%)                     |
| <b>Parent marital status</b>               |                              |
| 1. Parents were married                    | 806 (50%)                    |
| 2. Parents were divorced                   | 79 (4.9%)                    |
| 3. Parents were never married              | 566 (35%)                    |
| 4. One or both of them had died            | 89 (5.5%)                    |
| 5. Unsure                                  | 11 (0.7%)                    |
| (Missing)                                  | 73 (4.5%)                    |
| <b>Age 12 religious service attendance</b> |                              |
| 1. At least once a week                    | 1,026 (63%)                  |
| 2. One to three times a month              | 338 (21%)                    |
| 3. Less than once a month                  | 112 (6.9%)                   |
| 4. Never                                   | 132 (8.1%)                   |
| (Missing)                                  | 17 (1.0%)                    |
| <b>Relationship with mother</b>            |                              |
| 1. Very good                               | 1,335 (82%)                  |
| 2. Somewhat good                           | 161 (9.9%)                   |
| 3. Somewhat bad                            | 23 (1.4%)                    |
| 4. Very bad                                | 19 (1.2%)                    |
| 97. (Does not apply)                       | 72 (4.4%)                    |
| (Missing)                                  | 16 (1.0%)                    |
| <b>Relationship with father</b>            |                              |
| 1. Very good                               | 968 (60%)                    |
| 2. Somewhat good                           | 210 (13%)                    |
| 3. Somewhat bad                            | 54 (3.3%)                    |
| 4. Very bad                                | 104 (6.4%)                   |
| 97. (Does not apply)                       | 225 (14%)                    |
| (Missing)                                  | 63 (3.9%)                    |
| <b>Outsider growing up</b>                 |                              |
| 1. Yes                                     | 254 (16%)                    |
| 2. No                                      | 1,368 (84%)                  |

| <b>Characteristic</b>                                       | <b>N = 1,625<sup>1</sup></b> |
|-------------------------------------------------------------|------------------------------|
| (Missing)                                                   | 4 (0.2%)                     |
| <b>Abuse</b>                                                |                              |
| 1. Yes                                                      | 301 (19%)                    |
| 2. No                                                       | 1,298 (80%)                  |
| (Missing)                                                   | 26 (1.6%)                    |
| <b>Self-rated health growing up</b>                         |                              |
| 1. Excellent                                                | 764 (47%)                    |
| 2. Very good                                                | 358 (22%)                    |
| 3. Good                                                     | 197 (12%)                    |
| 4. Fair                                                     | 161 (9.9%)                   |
| 5. Poor                                                     | 132 (8.2%)                   |
| (Missing)                                                   | 12 (0.8%)                    |
| <b>Immigration status</b>                                   |                              |
| 1. Born in this country                                     | 1,536 (95%)                  |
| 2. Born in another country                                  | 89 (5.5%)                    |
| (Missing)                                                   | 0 (0%)                       |
| <b>Subjective financial status of family growing up</b>     |                              |
| 1. Lived comfortably                                        | 640 (39%)                    |
| 2. Got by                                                   | 516 (32%)                    |
| 3. Found it difficult                                       | 265 (16%)                    |
| 4. Found it very difficult                                  | 201 (12%)                    |
| (Missing)                                                   | 3 (0.2%)                     |
| <b>Religious affiliation</b>                                |                              |
| 1. Christianity                                             | 1,450 (89%)                  |
| 10. Taoism                                                  | 1 (<0.1%)                    |
| 11. Confucianism                                            | 0 (0%)                       |
| 12. Primal, Animist, or Folk religion                       | 56 (3.5%)                    |
| 13. Spiritism                                               | 0 (0%)                       |
| 14. Umbanda, Candomblé, and other African-derived religions | 0 (0%)                       |
| 15. Chinese folk/traditional religion                       | 0 (0%)                       |
| 2. Islam                                                    | 26 (1.6%)                    |
| 3. Hinduism                                                 | 1 (<0.1%)                    |
| 4. Buddhism                                                 | 10 (0.6%)                    |
| 5. Judaism                                                  | 0 (0%)                       |
| 6. Sikhism                                                  | 0 (0%)                       |
| 7. Baha'i                                                   | 0 (0%)                       |
| 8. Jainism                                                  | 0 (0%)                       |
| 9. Shinto                                                   | 2 (0.1%)                     |
| 96. Some other religion                                     | 4 (0.2%)                     |
| 97. No religion/Atheist/Agnostic                            | 60 (3.7%)                    |
| (Missing)                                                   | 14 (0.9%)                    |
| <b>Race/Ethnicity</b>                                       |                              |
| (Missing)                                                   | 3 (0.2%)                     |
| 1601. South Africa: Black                                   | 1,484 (91%)                  |
| 1602. South Africa: Asian/Indian                            | 2 (0.1%)                     |
| 1603. South Africa: Colored                                 | 127 (7.8%)                   |
| 1604. South Africa: White                                   | 8 (0.5%)                     |

| Characteristic                | N = 1,625 <sup>1</sup> |
|-------------------------------|------------------------|
| 9996. Other                   | 1 (<0.1%)              |
| <sup>1</sup> Mean (SD); n (%) |                        |

**Table S17c. South Africa: Proportions by demographic category**

| Variable                     | Category                                 | Proportion | 95% CI         | SE    | p-value  |
|------------------------------|------------------------------------------|------------|----------------|-------|----------|
| Age group                    | 1998-2005 (current age: 18-24 years)     | 0.904      | (0.854, 0.953) | 0.025 | 6.71e-01 |
|                              | 1943 or earlier (current age: 80+ years) | 0.765      | (0.000, 1.000) | 0.202 |          |
|                              | 1943-1953 (current age: 70-79 years)     | 0.929      | (0.839, 1.000) | 0.045 |          |
|                              | 1953-1963 (current age: 60-69 years)     | 0.934      | (0.883, 0.985) | 0.026 |          |
|                              | 1963-1973 (current age: 50-59 years)     | 0.900      | (0.836, 0.964) | 0.032 |          |
|                              | 1973-1983 (current age: 40-49 years)     | 0.869      | (0.813, 0.926) | 0.029 |          |
|                              | 1983-1993 (current age: 30-39 years)     | 0.909      | (0.876, 0.943) | 0.017 |          |
|                              | 1993-1998 (current age: 25-29 years)     | 0.913      | (0.866, 0.960) | 0.024 |          |
|                              | Male                                     | 0.905      | (0.872, 0.938) | 0.017 |          |
|                              | Female                                   | 0.899      | (0.875, 0.924) | 0.012 |          |
| Gender                       | Other                                    | *          | *              | *     | 7.71e-01 |
| Marital status               | Single/Never been married                | 0.898      | (0.870, 0.926) | 0.014 |          |
|                              | Divorced                                 | 0.979      | (0.932, 1.000) | 0.022 |          |
|                              | Domestic partner                         | 0.935      | (0.877, 0.992) | 0.029 |          |
|                              | Married                                  | 0.903      | (0.851, 0.954) | 0.026 |          |
|                              | Separated                                | 0.829      | (0.662, 0.996) | 0.081 |          |
|                              | Widowed                                  | 0.887      | (0.801, 0.972) | 0.043 |          |
|                              | Employed for an employer                 | 0.893      | (0.843, 0.943) | 0.025 |          |
| Employment                   | Homemaker                                | 0.892      | (0.814, 0.970) | 0.039 | 9.04e-01 |
|                              | None of these/Other                      | 0.922      | (0.830, 1.000) | 0.045 |          |
|                              | Retired                                  | 0.908      | (0.824, 0.992) | 0.042 |          |
|                              | Self-employed                            | 0.914      | (0.871, 0.956) | 0.022 |          |
|                              | Student                                  | 0.851      | (0.752, 0.949) | 0.050 |          |
|                              | Unemployed and looking for a job         | 0.911      | (0.879, 0.942) | 0.016 |          |
|                              | Religious service attendance             |            |                |       |          |
| Religious service attendance | Never                                    | 0.852      | (0.776, 0.927) | 0.038 | 7.18e-02 |
|                              | A few times a year                       | 0.893      | (0.838, 0.947) | 0.028 |          |
|                              | More than once a week                    | 0.900      | (0.848, 0.953) | 0.027 |          |
|                              | Once a week                              | 0.903      | (0.864, 0.942) | 0.020 |          |
|                              | One to three times a month               | 0.939      | (0.910, 0.969) | 0.015 |          |
| Education                    | 9-15                                     | 0.910      | (0.888, 0.931) | 0.011 | 2.96e-02 |
|                              | 16+                                      | 0.959      | (0.917, 1.000) | 0.021 |          |

| Variable                 | Category                                                          | Proportion | 95% CI         | SE    | p-value  |
|--------------------------|-------------------------------------------------------------------|------------|----------------|-------|----------|
| Immigration status       | Up to 8<br>Born in this<br>country                                | 0.868      | (0.810, 0.926) | 0.029 | 5.07e-01 |
|                          | Born in another<br>country                                        | 0.904      | (0.883, 0.926) | 0.011 |          |
|                          | No<br>religion/Atheist/Ag<br>nostic                               | 0.861      | (0.732, 0.991) | 0.065 |          |
|                          | Christianity                                                      | 0.887      | (0.811, 0.963) | 0.038 |          |
| Religious<br>affiliation | Combined                                                          | 0.904      | (0.882, 0.926) | 0.011 | 6.32e-01 |
|                          | Spiritism                                                         | 0.943      | (0.859, 1.000) | 0.042 |          |
|                          | Umbanda,<br>Candomblé, and<br>other African-<br>derived religions | *          | *              | *     |          |
|                          | Buddhism                                                          | *          | *              | *     |          |
|                          | Islam                                                             | *          | *              | *     |          |
|                          | Chinese<br>folk/traditional<br>religion                           | *          | *              | *     |          |
|                          | Hinduism                                                          | *          | *              | *     |          |
|                          | Judaism                                                           | *          | *              | *     |          |
|                          | Primal, Animist, or<br>Folk religion                              | 0.870      | (0.759, 0.981) | 0.056 |          |
|                          |                                                                   |            |                |       |          |
|                          |                                                                   |            |                |       |          |
|                          |                                                                   |            |                |       |          |
|                          |                                                                   |            |                |       |          |

**Table S17d. South Africa: Childhood predictors regression analysis**

| Variable                                                        | Category                                                                                                                | Risk-Ratio                       | logRR SE                         | RR 95% CI                                                | Global p-value |
|-----------------------------------------------------------------|-------------------------------------------------------------------------------------------------------------------------|----------------------------------|----------------------------------|----------------------------------------------------------|----------------|
| Relationship with your mother growing up                        | (Ref: Very bad/somewhat bad)<br>Very good/somewhat good                                                                 | 1.065                            | 0.050                            | (0.96,1.18)                                              | 0.257          |
| Relationship with your father growing up                        | (Ref: Very bad/somewhat bad)<br>Very good/somewhat good                                                                 | 1.004                            | 0.032                            | (0.94,1.07)                                              | 0.597          |
| Parents married to each other when you were around 12 years old | (Ref: Parents married)<br>One or both of them had died<br>Parents were divorced<br>Parents were never married<br>Unsure | 1.000<br>1.031<br>1.002<br>0.771 | 0.055<br>0.046<br>0.022<br>0.191 | (0.90,1.11)<br>(0.94,1.13)<br>(0.96,1.05)<br>(0.53,1.12) | 0.605          |
| Feelings about familys household income when growing up         | (Ref: Got by)<br>Found it difficult<br>Found it very difficult<br>Lived comfortably                                     | 0.959<br>0.976<br>0.988          | 0.033<br>0.041<br>0.024          | (0.90,1.02)<br>(0.90,1.06)<br>(0.94,1.04)                | 0.521          |
| Physically or sexually abused when growing up                   | (Ref: No)                                                                                                               | 0.985                            | 0.031                            | (0.93,1.05)                                              | 0.527          |
| Felt like an outsider in your family when growing up            | (Ref: No)<br>Yes                                                                                                        | 1.046                            | 0.023                            | (1.00,1.09)                                              | 0.060          |
| Your health when growing up                                     | (Ref: Good)<br>Excellent<br>Fair<br>Poor<br>Very good                                                                   | 0.989<br>0.989<br>1.046<br>0.962 | 0.031<br>0.045<br>0.038<br>0.035 | (0.93,1.05)<br>(0.90,1.08)<br>(0.97,1.13)<br>(0.90,1.03) | 0.571          |
| Born in This                                                    | (Ref: Born in this                                                                                                      |                                  |                                  |                                                          | 0.477          |

| Variable                                                                                  | Category                                  | Risk-Ratio | logRR SE | RR 95% CI   | Global p-value |
|-------------------------------------------------------------------------------------------|-------------------------------------------|------------|----------|-------------|----------------|
| country                                                                                   | country)                                  |            |          |             |                |
|                                                                                           | Born in another country                   | 0.960      | 0.062    | (0.85,1.08) |                |
| How Often You Attended Religious Services or Worshipped When You Were Around 12 Years Old | (Ref: Never)                              |            |          |             | 0.762          |
|                                                                                           | At least once a week                      | 0.999      | 0.058    | (0.89,1.12) |                |
|                                                                                           | Less than once a month                    | 0.963      | 0.072    | (0.84,1.11) |                |
|                                                                                           | One to three times a month                | 0.994      | 0.062    | (0.88,1.12) |                |
| Year of birth (age group)                                                                 | (Ref: 1998-2005; current age: 18-24)      |            |          |             | 0.831          |
|                                                                                           | 1943 or earlier (current age: 80+ years)  | 0.872      | 0.208    | (0.58,1.31) |                |
|                                                                                           | 1943-1953 (current age: 70-79 years)      | 1.019      | 0.053    | (0.92,1.13) |                |
|                                                                                           | 1953-1963 (current age: 60-69 years)      | 1.028      | 0.039    | (0.95,1.11) |                |
|                                                                                           | 1963-1973 (current age: 50-59 years)      | 0.992      | 0.042    | (0.91,1.08) |                |
|                                                                                           | 1973-1983 (current age: 40-49 years)      | 0.967      | 0.035    | (0.90,1.04) |                |
|                                                                                           | 1983-1993 (current age: 30-39 years)      | 1.004      | 0.030    | (0.95,1.06) |                |
|                                                                                           | 1993-1998 (current age: 25-29 years)      | 1.010      | 0.034    | (0.94,1.08) |                |
| Religion when twelve years old                                                            | (Ref: No religion/Atheist/Agnostic)       |            |          |             | 0.662          |
|                                                                                           | Christianity                              | 1.001      | 0.060    | (0.89,1.13) |                |
|                                                                                           | Collapsed affiliations with prevalence<3% | 1.066      | 0.070    | (0.93,1.22) |                |
|                                                                                           | Primal, Animist, or Folk religion         | 0.961      | 0.077    | (0.83,1.12) |                |
| Race plurality (prominent race/ethnic group [0] or not [1])                               | (Ref: Plurality group)                    |            |          |             | 0.608          |
|                                                                                           | Non-plurality groups                      | 1.002      | 0.036    | (0.93,1.08) |                |

**Table S17e. South Africa: Sensitivity to unmeasured confounding of childhood predictors**

| Variable                                                                                 | Category                                 | E-value for Estimate | E-value for 95% CI |
|------------------------------------------------------------------------------------------|------------------------------------------|----------------------|--------------------|
| Relationship with your mother growing up                                                 | (Ref: Very bad/somewhat bad)             |                      |                    |
|                                                                                          | Very good/somewhat good                  | 1.33                 | 1.00               |
| Relationship with your father growing up                                                 | (Ref: Very bad/somewhat bad)             |                      |                    |
|                                                                                          | Very good/somewhat good                  | 1.07                 | 1.00               |
| Parents married to each other when you were around 12 years old                          | (Ref: Parents married)                   |                      |                    |
|                                                                                          | One or both of them had died             | 1.00                 | 1.00               |
|                                                                                          | Parents were divorced                    | 1.21                 | 1.00               |
|                                                                                          | Parents were never married               | 1.04                 | 1.00               |
|                                                                                          | Unsure                                   | 1.92                 | 1.00               |
| Feelings about family household income when growing up                                   | (Ref: Got by)                            |                      |                    |
|                                                                                          | Found it difficult                       | 1.25                 | 1.00               |
|                                                                                          | Found it very difficult                  | 1.18                 | 1.00               |
|                                                                                          | Lived comfortably                        | 1.12                 | 1.00               |
| Physically or sexually abused when growing up                                            | (Ref: No)                                |                      |                    |
|                                                                                          |                                          | 1.14                 | 1.00               |
| Felt like an outsider in your family when growing up                                     | (Ref: No)                                |                      |                    |
|                                                                                          | Yes                                      | 1.27                 | 1.00               |
| Your health when growing up                                                              | (Ref: Good)                              |                      |                    |
|                                                                                          | Excellent                                | 1.12                 | 1.00               |
|                                                                                          | Fair                                     | 1.12                 | 1.00               |
|                                                                                          | Poor                                     | 1.26                 | 1.00               |
|                                                                                          | Very good                                | 1.24                 | 1.00               |
| Born in This country                                                                     | (Ref: Born in this country)              |                      |                    |
|                                                                                          | Born in another country                  | 1.25                 | 1.00               |
| How Often You Attended Religious Services or Worshiped When You Were Around 12 Years Old | (Ref: Never)                             |                      |                    |
|                                                                                          | At least once a week                     | 1.04                 | 1.00               |
|                                                                                          | Less than once a month                   | 1.24                 | 1.00               |
|                                                                                          | One to three times a month               | 1.08                 | 1.00               |
| Year of birth (age group)                                                                | (Ref: 1998-2005; current age: 18-24)     |                      |                    |
|                                                                                          | 1943 or earlier (current age: 80+ years) | 1.56                 | 1.00               |
|                                                                                          | 1943-1953 (current age: 70-79 years)     | 1.16                 | 1.00               |

| Variable                                                    | Category                                  | E-value for Estimate | E-value for 95% CI |
|-------------------------------------------------------------|-------------------------------------------|----------------------|--------------------|
|                                                             | 1953-1963 (current age: 60-69 years)      | 1.20                 | 1.00               |
|                                                             | 1963-1973 (current age: 50-59 years)      | 1.10                 | 1.00               |
|                                                             | 1973-1983 (current age: 40-49 years)      | 1.22                 | 1.00               |
|                                                             | 1983-1993 (current age: 30-39 years)      | 1.07                 | 1.00               |
|                                                             | 1993-1998 (current age: 25-29 years)      | 1.11                 | 1.00               |
| Religion when twelve years old                              | (Ref: No religion/Atheist/Agnostic)       |                      |                    |
|                                                             | Christianity                              | 1.03                 | 1.00               |
|                                                             | Collapsed affiliations with prevalence<3% | 1.33                 | 1.00               |
|                                                             | Primal, Animist, or Folk religion         | 1.25                 | 1.00               |
| Race plurality (prominent race/ethnic group [0] or not [1]) | (Ref: Plurality group)                    |                      |                    |
|                                                             | Non-plurality groups                      | 1.04                 | 1.00               |

**Table S18a. Spain: Demographic descriptive statistics**

| <b>Characteristic</b>                    | <b>N = 2,215<sup>1</sup></b> |
|------------------------------------------|------------------------------|
| <b>Age group</b>                         |                              |
| 1943 or earlier (current age: 80+ years) | 10 (0.4%)                    |
| 1943-1953 (current age: 70-79 years)     | 133 (6.0%)                   |
| 1953-1963 (current age: 60-69 years)     | 362 (16%)                    |
| 1963-1973 (current age: 50-59 years)     | 451 (20%)                    |
| 1973-1983 (current age: 40-49 years)     | 524 (24%)                    |
| 1983-1993 (current age: 30-39 years)     | 380 (17%)                    |
| 1993-1998 (current age: 25-29 years)     | 152 (6.9%)                   |
| 1998-2005 (current age: 18-24 years)     | 203 (9.2%)                   |
| (Missing)                                | 0 (0%)                       |
| <b>Gender</b>                            |                              |
| 1. Male                                  | 1,105 (50%)                  |
| 2. Female                                | 1,102 (50%)                  |
| 3. Other                                 | 0 (<0.1%)                    |
| (Missing)                                | 8 (0.4%)                     |
| <b>Marital status</b>                    |                              |
| 1. Single/Never been married             | 622 (28%)                    |
| 2. Married                               | 1,060 (48%)                  |
| 3. Separated                             | 56 (2.5%)                    |
| 4. Divorced                              | 188 (8.5%)                   |
| 5. Widowed                               | 64 (2.9%)                    |
| 6. Domestic partner                      | 214 (9.7%)                   |
| (Missing)                                | 10 (0.4%)                    |
| <b>Employment</b>                        |                              |
| 1. Employed for an employer              | 1,103 (50%)                  |
| 2. Self-employed                         | 158 (7.1%)                   |
| 3. Retired                               | 393 (18%)                    |
| 4. Student                               | 155 (7.0%)                   |
| 5. Homemaker                             | 140 (6.3%)                   |
| 6. Unemployed and looking for a job      | 227 (10%)                    |
| 7. None of these/Other                   | 34 (1.5%)                    |
| (Missing)                                | 5 (0.2%)                     |
| <b>Religious service attendance</b>      |                              |
| 1. More than once a week                 | 86 (3.9%)                    |
| 2. Once a week                           | 231 (10%)                    |
| 3. One to three times a month            | 125 (5.7%)                   |
| 4. A few times a year                    | 696 (31%)                    |
| 5. Never                                 | 1,069 (48%)                  |
| (Missing)                                | 7 (0.3%)                     |
| <b>Education</b>                         |                              |
| 1. Up to 8                               | 268 (12%)                    |
| 2. 9-15                                  | 1,443 (65%)                  |
| 3. 16+                                   | 504 (23%)                    |
| (Missing)                                | 0 (0%)                       |
| <b>Immigration</b>                       |                              |
| 1. Born in this country                  | 1,948 (88%)                  |
| 2. Born in another country               | 258 (12%)                    |

| <b>Characteristic</b>                                       | <b>N = 2,215<sup>1</sup></b> |
|-------------------------------------------------------------|------------------------------|
| (Missing)                                                   | 9 (0.4%)                     |
| <b>Religious affiliation</b>                                |                              |
| 1. Christianity                                             | 1,350 (61%)                  |
| 10. Taoism                                                  | 0 (0%)                       |
| 11. Confucianism                                            | 1 (<0.1%)                    |
| 12. Primal, Animist, or Folk religion                       | 2 (<0.1%)                    |
| 13. Spiritism                                               | 0 (0%)                       |
| 14. Umbanda, Candomblé, and other African-derived religions | 0 (0%)                       |
| 15. Chinese folk/traditional religion                       | 0 (0%)                       |
| 2. Islam                                                    | 39 (1.8%)                    |
| 3. Hinduism                                                 | 1 (<0.1%)                    |
| 4. Buddhism                                                 | 9 (0.4%)                     |
| 5. Judaism                                                  | 0 (<0.1%)                    |
| 6. Sikhism                                                  | 0 (<0.1%)                    |
| 7. Baha'i                                                   | 1 (<0.1%)                    |
| 8. Jainism                                                  | 0 (0%)                       |
| 9. Shinto                                                   | 0 (0%)                       |
| 96. Some other religion                                     | 13 (0.6%)                    |
| 97. No religion/Atheist/Agnostic                            | 778 (35%)                    |
| (Missing)                                                   | 21 (0.9%)                    |

<sup>1</sup>n (%)

**Table S18b. Spain: Childhood descriptive statistics**

| <b>Characteristic</b>                      | <b>N = 2,215<sup>1</sup></b> |
|--------------------------------------------|------------------------------|
| <b>Age</b>                                 | 47 (15)                      |
| <b>Year of birth</b>                       |                              |
| 1943 or earlier (current age: 80+ years)   | 10 (0.4%)                    |
| 1943-1953 (current age: 70-79 years)       | 133 (6.0%)                   |
| 1953-1963 (current age: 60-69 years)       | 362 (16%)                    |
| 1963-1973 (current age: 50-59 years)       | 451 (20%)                    |
| 1973-1983 (current age: 40-49 years)       | 524 (24%)                    |
| 1983-1993 (current age: 30-39 years)       | 380 (17%)                    |
| 1993-1998 (current age: 25-29 years)       | 152 (6.9%)                   |
| 1998-2005 (current age: 18-24 years)       | 203 (9.2%)                   |
| (Missing)                                  | 0 (0%)                       |
| <b>Gender</b>                              |                              |
| 1. Male                                    | 1,105 (50%)                  |
| 2. Female                                  | 1,102 (50%)                  |
| 3. Other                                   | 0 (<0.1%)                    |
| (Missing)                                  | 8 (0.4%)                     |
| <b>Parent marital status</b>               |                              |
| 1. Parents were married                    | 1,941 (88%)                  |
| 2. Parents were divorced                   | 122 (5.5%)                   |
| 3. Parents were never married              | 87 (3.9%)                    |
| 4. One or both of them had died            | 37 (1.7%)                    |
| 5. Unsure                                  | 18 (0.8%)                    |
| (Missing)                                  | 10 (0.4%)                    |
| <b>Age 12 religious service attendance</b> |                              |
| 1. At least once a week                    | 800 (36%)                    |
| 2. One to three times a month              | 393 (18%)                    |
| 3. Less than once a month                  | 466 (21%)                    |
| 4. Never                                   | 537 (24%)                    |
| (Missing)                                  | 18 (0.8%)                    |
| <b>Relationship with mother</b>            |                              |
| 1. Very good                               | 1,571 (71%)                  |
| 2. Somewhat good                           | 447 (20%)                    |
| 3. Somewhat bad                            | 94 (4.2%)                    |
| 4. Very bad                                | 28 (1.3%)                    |
| 97. (Does not apply)                       | 66 (3.0%)                    |
| (Missing)                                  | 10 (0.4%)                    |
| <b>Relationship with father</b>            |                              |
| 1. Very good                               | 1,408 (64%)                  |
| 2. Somewhat good                           | 515 (23%)                    |
| 3. Somewhat bad                            | 116 (5.2%)                   |
| 4. Very bad                                | 69 (3.1%)                    |
| 97. (Does not apply)                       | 94 (4.3%)                    |
| (Missing)                                  | 13 (0.6%)                    |
| <b>Outsider growing up</b>                 |                              |
| 1. Yes                                     | 223 (10%)                    |
| 2. No                                      | 1,967 (89%)                  |
| (Missing)                                  | 25 (1.1%)                    |

| Characteristic                                              | N = 2,215 <sup>1</sup> |
|-------------------------------------------------------------|------------------------|
| <b>Abuse</b>                                                |                        |
| 1. Yes                                                      | 240 (11%)              |
| 2. No                                                       | 1,967 (89%)            |
| (Missing)                                                   | 8 (0.4%)               |
| <b>Self-rated health growing up</b>                         |                        |
| 1. Excellent                                                | 869 (39%)              |
| 2. Very good                                                | 789 (36%)              |
| 3. Good                                                     | 434 (20%)              |
| 4. Fair                                                     | 82 (3.7%)              |
| 5. Poor                                                     | 31 (1.4%)              |
| (Missing)                                                   | 10 (0.4%)              |
| <b>Immigration status</b>                                   |                        |
| 1. Born in this country                                     | 1,948 (88%)            |
| 2. Born in another country                                  | 258 (12%)              |
| (Missing)                                                   | 9 (0.4%)               |
| <b>Subjective financial status of family growing up</b>     |                        |
| 1. Lived comfortably                                        | 694 (31%)              |
| 2. Got by                                                   | 1,015 (46%)            |
| 3. Found it difficult                                       | 455 (21%)              |
| 4. Found it very difficult                                  | 44 (2.0%)              |
| (Missing)                                                   | 7 (0.3%)               |
| <b>Religious affiliation</b>                                |                        |
| 1. Christianity                                             | 1,851 (84%)            |
| 10. Taoism                                                  | 0 (0%)                 |
| 11. Confucianism                                            | 1 (<0.1%)              |
| 12. Primal, Animist, or Folk religion                       | 0 (<0.1%)              |
| 13. Spiritism                                               | 0 (0%)                 |
| 14. Umbanda, Candomblé, and other African-derived religions | 0 (0%)                 |
| 15. Chinese folk/traditional religion                       | 0 (0%)                 |
| 2. Islam                                                    | 31 (1.4%)              |
| 3. Hinduism                                                 | 0 (<0.1%)              |
| 4. Buddhism                                                 | 1 (<0.1%)              |
| 5. Judaism                                                  | 0 (<0.1%)              |
| 6. Sikhism                                                  | 0 (0%)                 |
| 7. Baha'i                                                   | 0 (0%)                 |
| 8. Jainism                                                  | 0 (0%)                 |
| 9. Shinto                                                   | 0 (0%)                 |
| 96. Some other religion                                     | 6 (0.3%)               |
| 97. No religion/Atheist/Agnostic                            | 311 (14%)              |
| (Missing)                                                   | 13 (0.6%)              |

<sup>1</sup>Mean (SD); n (%)

**Table S18c. Spain: Proportions by demographic category**

| Variable                     | Category                                 | Proportion | 95% CI         | SE    | p-value  |
|------------------------------|------------------------------------------|------------|----------------|-------|----------|
| Age group                    | 1998-2005 (current age: 18-24 years)     | 0.840      | (0.745, 0.935) | 0.048 | 6.76e-01 |
|                              | 1943 or earlier (current age: 80+ years) | 0.917      | *              | *     |          |
|                              | 1943-1953 (current age: 70-79 years)     | 0.775      | (0.639, 0.912) | 0.069 |          |
|                              | 1953-1963 (current age: 60-69 years)     | 0.793      | (0.723, 0.863) | 0.036 |          |
|                              | 1963-1973 (current age: 50-59 years)     | 0.787      | (0.744, 0.831) | 0.022 |          |
|                              | 1973-1983 (current age: 40-49 years)     | 0.822      | (0.784, 0.861) | 0.020 |          |
|                              | 1983-1993 (current age: 30-39 years)     | 0.793      | (0.741, 0.845) | 0.026 |          |
|                              | 1993-1998 (current age: 25-29 years)     | 0.774      | (0.669, 0.879) | 0.053 |          |
|                              | Male                                     | 0.795      | (0.759, 0.832) | 0.018 |          |
|                              | Female                                   | 0.808      | (0.776, 0.839) | 0.016 |          |
| Gender                       | Other                                    | 0.037      | *              | *     | < 1e-16  |
| Marital status               | Single/Never been married                | 0.825      | (0.780, 0.870) | 0.023 |          |
|                              | Divorced                                 | 0.711      | (0.601, 0.821) | 0.056 |          |
|                              | Domestic partner                         | 0.832      | (0.773, 0.891) | 0.030 |          |
|                              | Married                                  | 0.802      | (0.770, 0.834) | 0.017 |          |
|                              | Separated                                | 0.730      | (0.548, 0.912) | 0.091 |          |
|                              | Widowed                                  | 0.781      | (0.630, 0.932) | 0.075 |          |
|                              | Employed for an employer                 | 0.815      | (0.787, 0.844) | 0.015 |          |
| Employment                   | Homemaker                                | 0.817      | (0.729, 0.906) | 0.045 | 1.65e-01 |
|                              | None of these/Other                      | 0.825      | (0.534, 1.000) | 0.135 |          |
|                              | Retired                                  | 0.768      | (0.697, 0.838) | 0.036 |          |
|                              | Self-employed                            | 0.838      | (0.763, 0.912) | 0.038 |          |
|                              | Student                                  | 0.842      | (0.730, 0.954) | 0.057 |          |
|                              | Unemployed and looking for a job         | 0.724      | (0.645, 0.802) | 0.040 |          |
|                              | Religious service attendance             |            |                |       |          |
| Religious service attendance | Never                                    | 0.792      | (0.757, 0.826) | 0.018 | 6.31e-01 |
|                              | A few times a year                       | 0.797      | (0.755, 0.838) | 0.021 |          |
|                              | More than once a week                    | 0.854      | (0.757, 0.951) | 0.049 |          |
|                              | Once a week                              | 0.822      | (0.735, 0.909) | 0.044 |          |
|                              | One to three times a month               | 0.834      | (0.752, 0.917) | 0.041 |          |
| Education                    | 9-15                                     | 0.785      | (0.757, 0.814) | 0.014 | 4.07e-06 |
|                              | 16+                                      | 0.889      | (0.854, 0.923) | 0.018 |          |

| Variable                 | Category                                                          | Proportion | 95% CI         | SE    | p-value  |
|--------------------------|-------------------------------------------------------------------|------------|----------------|-------|----------|
| Immigration status       | Up to 8<br>Born in this<br>country                                | 0.723      | (0.616, 0.830) | 0.054 | 8.45e-01 |
|                          | Born in another<br>country                                        | 0.802      | (0.777, 0.828) | 0.013 |          |
|                          | No<br>religion/Atheist/Ag<br>nostic                               | 0.795      | (0.724, 0.866) | 0.036 |          |
| Religious<br>affiliation | Christianity                                                      | 0.795      | (0.753, 0.838) | 0.022 | 5.07e-01 |
|                          | Combined                                                          | 0.809      | (0.779, 0.838) | 0.015 |          |
|                          | Spiritism                                                         | 0.722      | (0.561, 0.882) | 0.080 |          |
|                          | Umbanda,<br>Candomblé, and<br>other African-<br>derived religions | *          | *              | *     |          |
|                          | Buddhism                                                          | *          | *              | *     |          |
|                          | Islam                                                             | *          | *              | *     |          |
|                          | Chinese<br>folk/traditional<br>religion                           | *          | *              | *     |          |
|                          | Hinduism                                                          | *          | *              | *     |          |
|                          | Judaism                                                           | *          | *              | *     |          |
|                          | Primal, Animist, or<br>Folk religion                              | *          | *              | *     |          |

**Table S18d. Spain: Childhood predictors regression analysis**

| Variable                                                        | Category                     | Risk-Ratio | logRR SE | RR 95% CI   | Global p-value |
|-----------------------------------------------------------------|------------------------------|------------|----------|-------------|----------------|
| Relationship with your mother growing up                        | (Ref: Very bad/somewhat bad) |            |          |             | 0.461          |
|                                                                 | Very good/somewhat good      | 1.038      | 0.053    | (0.94,1.15) |                |
| Relationship with your father growing up                        | (Ref: Very bad/somewhat bad) |            |          |             | 0.319          |
|                                                                 | Very good/somewhat good      | 1.052      | 0.046    | (0.96,1.15) |                |
| Parents married to each other when you were around 12 years old | (Ref: Parents married)       |            |          |             | 3.91e-05       |
|                                                                 | One or both of them had died | 1.213      | 0.044    | (1.11,1.32) |                |
|                                                                 | Parents were divorced        | 1.060      | 0.059    | (0.95,1.19) |                |
|                                                                 | Parents were never married   | 1.037      | 0.057    | (0.93,1.16) |                |
|                                                                 | Unsure                       | 0.850      | 0.200    | (0.57,1.26) |                |
| Feelings about familys household income when growing up         | (Ref: Got by)                |            |          |             | 0.354          |
|                                                                 | Found it difficult           | 1.005      | 0.033    | (0.94,1.07) |                |
|                                                                 | Found it very difficult      | 0.874      | 0.098    | (0.72,1.06) |                |
|                                                                 | Lived comfortably            | 1.036      | 0.026    | (0.98,1.09) |                |
| Physically or sexually abused when growing up                   | (Ref: No)                    |            |          |             | 0.276          |
|                                                                 |                              | 1.049      | 0.040    | (0.97,1.13) |                |
| Felt like an outsider in your family when growing up            | (Ref: No)                    |            |          |             | 0.277          |
|                                                                 | Yes                          | 0.941      | 0.050    | (0.85,1.04) |                |
| Your health when growing up                                     | (Ref: Good)                  |            |          |             | 0.273          |
|                                                                 | Excellent                    | 1.067      | 0.034    | (1.00,1.14) |                |
|                                                                 | Fair                         | 1.017      | 0.073    | (0.88,1.17) |                |
|                                                                 | Poor                         | 1.009      | 0.106    | (0.82,1.24) |                |
| Born in This                                                    | Very good                    | 1.035      | 0.035    | (0.97,1.11) | 0.496          |
|                                                                 | (Ref: Born in this           |            |          |             |                |

| Variable                                                                                  | Category                                  | Risk-Ratio | logRR SE | RR 95% CI   | Global p-value |
|-------------------------------------------------------------------------------------------|-------------------------------------------|------------|----------|-------------|----------------|
| country                                                                                   | country)                                  |            |          |             |                |
|                                                                                           | Born in another country                   | 0.977      | 0.039    | (0.91,1.05) |                |
| How Often You Attended Religious Services or Worshipped When You Were Around 12 Years Old | (Ref: Never)                              |            |          |             | 0.093          |
|                                                                                           | At least once a week                      | 1.074      | 0.034    | (1.00,1.15) |                |
|                                                                                           | Less than once a month                    | 0.986      | 0.038    | (0.92,1.06) |                |
|                                                                                           | One to three times a month                | 1.066      | 0.036    | (0.99,1.14) |                |
| Year of birth (age group)                                                                 | (Ref: 1998-2005; current age: 18-24)      |            |          |             | 0.539          |
|                                                                                           | 1943 or earlier (current age: 80+ years)  | 1.034      | 0.095    | (0.86,1.24) |                |
|                                                                                           | 1943-1953 (current age: 70-79 years)      | 0.903      | 0.081    | (0.77,1.06) |                |
|                                                                                           | 1953-1963 (current age: 60-69 years)      | 0.934      | 0.058    | (0.83,1.05) |                |
|                                                                                           | 1963-1973 (current age: 50-59 years)      | 0.934      | 0.052    | (0.84,1.03) |                |
|                                                                                           | 1973-1983 (current age: 40-49 years)      | 0.974      | 0.051    | (0.88,1.08) |                |
|                                                                                           | 1983-1993 (current age: 30-39 years)      | 0.943      | 0.054    | (0.85,1.05) |                |
|                                                                                           | 1993-1998 (current age: 25-29 years)      | 0.931      | 0.073    | (0.81,1.08) |                |
| Religion when twelve years old                                                            | (Ref: No religion/Atheist/Agnostic)       |            |          |             | 0.383          |
|                                                                                           | Christianity                              | 1.003      | 0.038    | (0.93,1.08) |                |
|                                                                                           | Collapsed affiliations with prevalence<3% | 0.851      | 0.117    | (0.68,1.07) |                |

**Table S18e. Spain: Sensitivity to unmeasured confounding of childhood predictors**

| Variable                                                                                 | Category                                 | E-value for Estimate | E-value for 95% CI |
|------------------------------------------------------------------------------------------|------------------------------------------|----------------------|--------------------|
| Relationship with your mother growing up                                                 | (Ref: Very bad/somewhat bad)             |                      |                    |
|                                                                                          | Very good/somewhat good                  | 1.24                 | 1.00               |
| Relationship with your father growing up                                                 | (Ref: Very bad/somewhat bad)             |                      |                    |
|                                                                                          | Very good/somewhat good                  | 1.29                 | 1.00               |
| Parents married to each other when you were around 12 years old                          | (Ref: Parents married)                   |                      |                    |
|                                                                                          | One or both of them had died             | 1.72                 | 1.47               |
|                                                                                          | Parents were divorced                    | 1.31                 | 1.00               |
|                                                                                          | Parents were never married               | 1.23                 | 1.00               |
|                                                                                          | Unsure                                   | 1.63                 | 1.00               |
| Feelings about family household income when growing up                                   | (Ref: Got by)                            |                      |                    |
|                                                                                          | Found it difficult                       | 1.08                 | 1.00               |
|                                                                                          | Found it very difficult                  | 1.55                 | 1.00               |
|                                                                                          | Lived comfortably                        | 1.23                 | 1.00               |
| Physically or sexually abused when growing up                                            | (Ref: No)                                |                      |                    |
|                                                                                          |                                          | 1.28                 | 1.00               |
| Felt like an outsider in your family when growing up                                     | (Ref: No)                                |                      |                    |
|                                                                                          | Yes                                      | 1.32                 | 1.00               |
| Your health when growing up                                                              | (Ref: Good)                              |                      |                    |
|                                                                                          | Excellent                                | 1.34                 | 1.00               |
|                                                                                          | Fair                                     | 1.15                 | 1.00               |
|                                                                                          | Poor                                     | 1.10                 | 1.00               |
|                                                                                          | Very good                                | 1.22                 | 1.00               |
| Born in This country                                                                     | (Ref: Born in this country)              |                      |                    |
|                                                                                          | Born in another country                  | 1.18                 | 1.00               |
| How Often You Attended Religious Services or Worshiped When You Were Around 12 Years Old | (Ref: Never)                             |                      |                    |
|                                                                                          | At least once a week                     | 1.36                 | 1.07               |
|                                                                                          | Less than once a month                   | 1.13                 | 1.00               |
|                                                                                          | One to three times a month               | 1.33                 | 1.00               |
| Year of birth (age group)                                                                | (Ref: 1998-2005; current age: 18-24)     |                      |                    |
|                                                                                          | 1943 or earlier (current age: 80+ years) | 1.22                 | 1.00               |
|                                                                                          | 1943-1953 (current age: 70-79 years)     | 1.45                 | 1.00               |

| Variable                       | Category                                  | E-value for Estimate | E-value for 95% CI |
|--------------------------------|-------------------------------------------|----------------------|--------------------|
|                                | 1953-1963 (current age: 60-69 years)      | 1.35                 | 1.00               |
|                                | 1963-1973 (current age: 50-59 years)      | 1.35                 | 1.00               |
|                                | 1973-1983 (current age: 40-49 years)      | 1.19                 | 1.00               |
|                                | 1983-1993 (current age: 30-39 years)      | 1.32                 | 1.00               |
|                                | 1993-1998 (current age: 25-29 years)      | 1.36                 | 1.00               |
| Religion when twelve years old | (Ref: No religion/Atheist/Agnostic)       |                      |                    |
|                                | Christianity                              | 1.06                 | 1.00               |
|                                | Collapsed affiliations with prevalence<3% | 1.63                 | 1.00               |

**Table S19a. Sweden: Demographic descriptive statistics**

| <b>Characteristic</b>                    | <b>N = 11,570<sup>1</sup></b> |
|------------------------------------------|-------------------------------|
| <b>Age group</b>                         |                               |
| 1943 or earlier (current age: 80+ years) | 448 (3.9%)                    |
| 1943-1953 (current age: 70-79 years)     | 1,716 (15%)                   |
| 1953-1963 (current age: 60-69 years)     | 1,657 (14%)                   |
| 1963-1973 (current age: 50-59 years)     | 1,945 (17%)                   |
| 1973-1983 (current age: 40-49 years)     | 1,808 (16%)                   |
| 1983-1993 (current age: 30-39 years)     | 1,935 (17%)                   |
| 1993-1998 (current age: 25-29 years)     | 981 (8.5%)                    |
| 1998-2005 (current age: 18-24 years)     | 1,080 (9.3%)                  |
| (Missing)                                | 0 (0%)                        |
| <b>Gender</b>                            |                               |
| 1. Male                                  | 5,680 (49%)                   |
| 2. Female                                | 5,855 (51%)                   |
| 3. Other                                 | 24 (0.2%)                     |
| (Missing)                                | 12 (0.1%)                     |
| <b>Marital status</b>                    |                               |
| 1. Single/Never been married             | 2,979 (26%)                   |
| 2. Married                               | 4,864 (42%)                   |
| 3. Separated                             | 317 (2.7%)                    |
| 4. Divorced                              | 628 (5.4%)                    |
| 5. Widowed                               | 330 (2.9%)                    |
| 6. Domestic partner                      | 2,403 (21%)                   |
| (Missing)                                | 50 (0.4%)                     |
| <b>Employment</b>                        |                               |
| 1. Employed for an employer              | 6,123 (53%)                   |
| 2. Self-employed                         | 842 (7.3%)                    |
| 3. Retired                               | 2,969 (26%)                   |
| 4. Student                               | 1,014 (8.8%)                  |
| 5. Homemaker                             | 62 (0.5%)                     |
| 6. Unemployed and looking for a job      | 247 (2.1%)                    |
| 7. None of these/Other                   | 301 (2.6%)                    |
| (Missing)                                | 11 (<0.1%)                    |
| <b>Religious service attendance</b>      |                               |
| 1. More than once a week                 | 166 (1.4%)                    |
| 2. Once a week                           | 279 (2.4%)                    |
| 3. One to three times a month            | 339 (2.9%)                    |
| 4. A few times a year                    | 2,981 (26%)                   |
| 5. Never                                 | 7,773 (67%)                   |
| (Missing)                                | 32 (0.3%)                     |
| <b>Education</b>                         |                               |
| 1. Up to 8                               | 194 (1.7%)                    |
| 2. 9-15                                  | 8,409 (73%)                   |
| 3. 16+                                   | 2,967 (26%)                   |
| (Missing)                                | 0 (0%)                        |
| <b>Immigration</b>                       |                               |
| 1. Born in this country                  | 10,738 (93%)                  |
| 2. Born in another country               | 763 (6.6%)                    |

| <b>Characteristic</b>                                       | <b>N = 11,570<sup>1</sup></b> |
|-------------------------------------------------------------|-------------------------------|
| (Missing)                                                   | 69 (0.6%)                     |
| <b>Religious affiliation</b>                                |                               |
| 1. Christianity                                             | 6,352 (55%)                   |
| 10. Taoism                                                  | 3 (<0.1%)                     |
| 11. Confucianism                                            | 0 (0%)                        |
| 12. Primal, Animist, or Folk religion                       | 59 (0.5%)                     |
| 13. Spiritism                                               | 0 (0%)                        |
| 14. Umbanda, Candomblé, and other African-derived religions | 0 (0%)                        |
| 15. Chinese folk/traditional religion                       | 0 (0%)                        |
| 2. Islam                                                    | 257 (2.2%)                    |
| 3. Hinduism                                                 | 12 (0.1%)                     |
| 4. Buddhism                                                 | 74 (0.6%)                     |
| 5. Judaism                                                  | 41 (0.4%)                     |
| 6. Sikhism                                                  | 0 (0%)                        |
| 7. Baha'i                                                   | 2 (<0.1%)                     |
| 8. Jainism                                                  | 0 (0%)                        |
| 9. Shinto                                                   | 0 (<0.1%)                     |
| 96. Some other religion                                     | 146 (1.3%)                    |
| 97. No religion/Atheist/Agnostic                            | 4,560 (39%)                   |
| (Missing)                                                   | 62 (0.5%)                     |

<sup>1</sup>n (%)

**Table S19b. Sweden: Childhood descriptive statistics**

| <b>Characteristic</b>                      | <b>N = 11,570<sup>1</sup></b> |
|--------------------------------------------|-------------------------------|
| <b>Age</b>                                 | 49 (18)                       |
| <b>Year of birth</b>                       |                               |
| 1943 or earlier (current age: 80+ years)   | 448 (3.9%)                    |
| 1943-1953 (current age: 70-79 years)       | 1,716 (15%)                   |
| 1953-1963 (current age: 60-69 years)       | 1,657 (14%)                   |
| 1963-1973 (current age: 50-59 years)       | 1,945 (17%)                   |
| 1973-1983 (current age: 40-49 years)       | 1,808 (16%)                   |
| 1983-1993 (current age: 30-39 years)       | 1,935 (17%)                   |
| 1993-1998 (current age: 25-29 years)       | 981 (8.5%)                    |
| 1998-2005 (current age: 18-24 years)       | 1,080 (9.3%)                  |
| (Missing)                                  | 0 (0%)                        |
| <b>Gender</b>                              |                               |
| 1. Male                                    | 5,680 (49%)                   |
| 2. Female                                  | 5,855 (51%)                   |
| 3. Other                                   | 24 (0.2%)                     |
| (Missing)                                  | 12 (0.1%)                     |
| <b>Parent marital status</b>               |                               |
| 1. Parents were married                    | 8,354 (72%)                   |
| 2. Parents were divorced                   | 1,463 (13%)                   |
| 3. Parents were never married              | 1,384 (12%)                   |
| 4. One or both of them had died            | 269 (2.3%)                    |
| 5. Unsure                                  | 58 (0.5%)                     |
| (Missing)                                  | 42 (0.4%)                     |
| <b>Age 12 religious service attendance</b> |                               |
| 1. At least once a week                    | 691 (6.0%)                    |
| 2. One to three times a month              | 996 (8.6%)                    |
| 3. Less than once a month                  | 4,715 (41%)                   |
| 4. Never                                   | 5,128 (44%)                   |
| (Missing)                                  | 39 (0.3%)                     |
| <b>Relationship with mother</b>            |                               |
| 1. Very good                               | 6,661 (58%)                   |
| 2. Somewhat good                           | 3,523 (30%)                   |
| 3. Somewhat bad                            | 917 (7.9%)                    |
| 4. Very bad                                | 287 (2.5%)                    |
| 97. (Does not apply)                       | 164 (1.4%)                    |
| (Missing)                                  | 17 (0.1%)                     |
| <b>Relationship with father</b>            |                               |
| 1. Very good                               | 5,388 (47%)                   |
| 2. Somewhat good                           | 3,827 (33%)                   |
| 3. Somewhat bad                            | 1,252 (11%)                   |
| 4. Very bad                                | 550 (4.8%)                    |
| 97. (Does not apply)                       | 542 (4.7%)                    |
| (Missing)                                  | 12 (0.1%)                     |
| <b>Outsider growing up</b>                 |                               |
| 1. Yes                                     | 1,429 (12%)                   |
| 2. No                                      | 10,006 (86%)                  |
| (Missing)                                  | 135 (1.2%)                    |

| Characteristic                                              | N = 11,570 <sup>1</sup> |
|-------------------------------------------------------------|-------------------------|
| <b>Abuse</b>                                                |                         |
| 1. Yes                                                      | 1,752 (15%)             |
| 2. No                                                       | 9,786 (85%)             |
| (Missing)                                                   | 32 (0.3%)               |
| <b>Self-rated health growing up</b>                         |                         |
| 1. Excellent                                                | 4,308 (37%)             |
| 2. Very good                                                | 3,941 (34%)             |
| 3. Good                                                     | 2,101 (18%)             |
| 4. Fair                                                     | 870 (7.5%)              |
| 5. Poor                                                     | 328 (2.8%)              |
| (Missing)                                                   | 22 (0.2%)               |
| <b>Immigration status</b>                                   |                         |
| 1. Born in this country                                     | 10,738 (93%)            |
| 2. Born in another country                                  | 763 (6.6%)              |
| (Missing)                                                   | 69 (0.6%)               |
| <b>Subjective financial status of family growing up</b>     |                         |
| 1. Lived comfortably                                        | 4,524 (39%)             |
| 2. Got by                                                   | 5,971 (52%)             |
| 3. Found it difficult                                       | 954 (8.2%)              |
| 4. Found it very difficult                                  | 105 (0.9%)              |
| (Missing)                                                   | 17 (0.1%)               |
| <b>Religious affiliation</b>                                |                         |
| 1. Christianity                                             | 8,175 (71%)             |
| 10. Taoism                                                  | 0 (0%)                  |
| 11. Confucianism                                            | 1 (<0.1%)               |
| 12. Primal, Animist, or Folk religion                       | 23 (0.2%)               |
| 13. Spiritism                                               | 0 (0%)                  |
| 14. Umbanda, Candomblé, and other African-derived religions | 0 (0%)                  |
| 15. Chinese folk/traditional religion                       | 0 (0%)                  |
| 2. Islam                                                    | 270 (2.3%)              |
| 3. Hinduism                                                 | 7 (<0.1%)               |
| 4. Buddhism                                                 | 25 (0.2%)               |
| 5. Judaism                                                  | 37 (0.3%)               |
| 6. Sikhism                                                  | 3 (<0.1%)               |
| 7. Baha'i                                                   | 2 (<0.1%)               |
| 8. Jainism                                                  | 0 (0%)                  |
| 9. Shinto                                                   | 0 (0%)                  |
| 96. Some other religion                                     | 52 (0.5%)               |
| 97. No religion/Atheist/Agnostic                            | 2,953 (26%)             |
| (Missing)                                                   | 21 (0.2%)               |

<sup>1</sup>Mean (SD); n (%)

**Table S19c. Sweden: Proportions by demographic category**

| Variable       | Category                                 | Proportion | 95% CI         | SE    | p-value  |
|----------------|------------------------------------------|------------|----------------|-------|----------|
| Age group      | 1998-2005 (current age: 18-24 years)     | 0.841      | (0.813, 0.869) | 0.014 | 2.51e-01 |
|                | 1943 or earlier (current age: 80+ years) | 0.874      | (0.842, 0.905) | 0.016 |          |
|                | 1943-1953 (current age: 70-79 years)     | 0.840      | (0.820, 0.859) | 0.010 |          |
|                | 1953-1963 (current age: 60-69 years)     | 0.843      | (0.825, 0.862) | 0.009 |          |
|                | 1963-1973 (current age: 50-59 years)     | 0.845      | (0.826, 0.863) | 0.009 |          |
|                | 1973-1983 (current age: 40-49 years)     | 0.829      | (0.808, 0.850) | 0.011 |          |
|                | 1983-1993 (current age: 30-39 years)     | 0.830      | (0.811, 0.850) | 0.010 |          |
|                | 1993-1998 (current age: 25-29 years)     | 0.818      | (0.789, 0.847) | 0.015 |          |
|                | Male                                     | 0.803      | (0.790, 0.815) | 0.006 |          |
|                | Female                                   | 0.871      | (0.861, 0.881) | 0.005 |          |
| Gender         | Other                                    | 0.915      | (0.803, 1.000) | 0.053 | < 1e-16  |
| Marital status | Single/Never been married                | 0.827      | (0.810, 0.844) | 0.009 |          |
|                | Divorced                                 | 0.842      | (0.811, 0.872) | 0.015 |          |
|                | Domestic partner                         | 0.828      | (0.811, 0.845) | 0.009 |          |
|                | Married                                  | 0.848      | (0.837, 0.860) | 0.006 |          |
|                | Separated                                | 0.839      | (0.796, 0.882) | 0.022 |          |
|                | Widowed                                  | 0.829      | (0.786, 0.873) | 0.022 |          |
|                | Employed for an employer                 | 0.827      | (0.816, 0.838) | 0.006 |          |
| Employment     | Homemaker                                | 0.860      | (0.758, 0.961) | 0.051 |          |
|                | None of these/Other                      | 0.825      | (0.776, 0.873) | 0.025 |          |
|                | Retired                                  | 0.846      | (0.832, 0.861) | 0.007 |          |
|                | Self-employed                            | 0.879      | (0.849, 0.908) | 0.015 |          |
|                | Student                                  | 0.862      | (0.835, 0.888) | 0.013 |          |
|                | Unemployed and looking for a job         | 0.755      | (0.698, 0.812) | 0.029 |          |
|                | Religious service attendance             |            |                |       |          |
|                | Never                                    | 0.814      | (0.804, 0.824) | 0.005 | 1.11e-16 |
|                | A few times a year                       | 0.885      | (0.871, 0.899) | 0.007 |          |
|                | More than once a week                    | 0.909      | (0.849, 0.969) | 0.030 |          |
|                | Once a week                              | 0.905      | (0.862, 0.948) | 0.022 |          |
|                | One to three times a month               | 0.860      | (0.816, 0.905) | 0.023 |          |
| Education      | 9-15                                     | 0.820      | (0.810, 0.830) | 0.005 | < 1e-16  |
|                | 16+                                      | 0.893      | (0.880, 0.905) | 0.006 |          |

| Variable                 | Category                                                          | Proportion | 95% CI         | SE    | p-value  |
|--------------------------|-------------------------------------------------------------------|------------|----------------|-------|----------|
| Immigration status       | Up to 8<br>Born in this<br>country                                | 0.756      | (0.684, 0.829) | 0.037 | 4.79e-02 |
|                          | Born in another<br>country                                        | 0.835      | (0.827, 0.844) | 0.004 |          |
|                          | No<br>religion/Atheist/Ag<br>nostic                               | 0.866      | (0.837, 0.895) | 0.015 |          |
| Religious<br>affiliation | Christianity                                                      | 0.832      | (0.820, 0.843) | 0.006 | 3.66e-01 |
|                          | Combined                                                          | 0.840      | (0.829, 0.851) | 0.005 |          |
|                          | Spiritism                                                         | 0.857      | (0.816, 0.898) | 0.021 |          |
|                          | Umbanda,<br>Candomblé, and<br>other African-<br>derived religions | *          | *              | *     |          |
|                          | Buddhism                                                          | *          | *              | *     |          |
|                          | Islam                                                             | *          | *              | *     |          |
|                          | Chinese<br>folk/traditional<br>religion                           | *          | *              | *     |          |
|                          | Hinduism                                                          | *          | *              | *     |          |
|                          | Judaism                                                           | *          | *              | *     |          |
|                          | Primal, Animist, or<br>Folk religion                              | *          | *              | *     |          |

**Table S19d. Sweden: Childhood predictors regression analysis**

| Variable                                                        | Category                                                                                                                | Risk-Ratio                       | logRR SE                         | RR 95% CI                                                | Global p-value |
|-----------------------------------------------------------------|-------------------------------------------------------------------------------------------------------------------------|----------------------------------|----------------------------------|----------------------------------------------------------|----------------|
| Relationship with your mother growing up                        | (Ref: Very bad/somewhat bad)<br>Very good/somewhat good                                                                 | 1.004                            | 0.014                            | (0.98,1.03)                                              | 0.567          |
| Relationship with your father growing up                        | (Ref: Very bad/somewhat bad)<br>Very good/somewhat good                                                                 | 0.990                            | 0.012                            | (0.97,1.01)                                              | 0.428          |
| Parents married to each other when you were around 12 years old | (Ref: Parents married)<br>One or both of them had died<br>Parents were divorced<br>Parents were never married<br>Unsure | 1.027<br>1.018<br>0.996<br>1.023 | 0.028<br>0.013<br>0.014<br>0.053 | (0.97,1.08)<br>(0.99,1.04)<br>(0.97,1.02)<br>(0.92,1.13) | 0.521          |
| Feelings about familys household income when growing up         | (Ref: Got by)<br>Found it difficult<br>Found it very difficult<br>Lived comfortably                                     | 0.981<br>1.014<br>1.028          | 0.016<br>0.038<br>0.009          | (0.95,1.01)<br>(0.94,1.09)<br>(1.01,1.05)                | 0.006          |
| Physically or sexually abused when growing up                   | (Ref: No)                                                                                                               | 1.032                            | 0.011                            | (1.01,1.06)                                              | 0.005          |
| Felt like an outsider in your family when growing up            | (Ref: No)<br>Yes                                                                                                        | 1.020                            | 0.014                            | (0.99,1.05)                                              | 0.173          |
| Your health when growing up                                     | (Ref: Good)<br>Excellent<br>Fair<br>Poor<br>Very good                                                                   | 1.003<br>0.977<br>0.980<br>0.986 | 0.012<br>0.017<br>0.026<br>0.012 | (0.98,1.03)<br>(0.94,1.01)<br>(0.93,1.03)<br>(0.96,1.01) | 0.489          |
| Born in This                                                    | (Ref: Born in this                                                                                                      |                                  |                                  |                                                          | 0.113          |

| Variable                                                                                  | Category                                  | Risk-Ratio | logRR SE | RR 95% CI   | Global p-value |
|-------------------------------------------------------------------------------------------|-------------------------------------------|------------|----------|-------------|----------------|
| country                                                                                   | country)                                  |            |          |             |                |
|                                                                                           | Born in another country                   | 1.027      | 0.016    | (1.00,1.06) |                |
| How Often You Attended Religious Services or Worshipped When You Were Around 12 Years Old | (Ref: Never)                              |            |          |             | 6.66e-16       |
|                                                                                           | At least once a week                      | 1.113      | 0.016    | (1.08,1.15) |                |
|                                                                                           | Less than once a month                    | 1.087      | 0.009    | (1.07,1.11) |                |
|                                                                                           | One to three times a month                | 1.074      | 0.015    | (1.04,1.11) |                |
| Year of birth (age group)                                                                 | (Ref: 1998-2005; current age: 18-24)      |            |          |             | 0.652          |
|                                                                                           | 1943 or earlier (current age: 80+ years)  | 1.037      | 0.023    | (0.99,1.08) |                |
|                                                                                           | 1943-1953 (current age: 70-79 years)      | 1.007      | 0.019    | (0.97,1.05) |                |
|                                                                                           | 1953-1963 (current age: 60-69 years)      | 1.011      | 0.018    | (0.98,1.05) |                |
|                                                                                           | 1963-1973 (current age: 50-59 years)      | 1.010      | 0.018    | (0.97,1.05) |                |
|                                                                                           | 1973-1983 (current age: 40-49 years)      | 0.995      | 0.018    | (0.96,1.03) |                |
|                                                                                           | 1983-1993 (current age: 30-39 years)      | 1.000      | 0.018    | (0.97,1.04) |                |
|                                                                                           | 1993-1998 (current age: 25-29 years)      | 0.982      | 0.021    | (0.94,1.02) |                |
| Religion when twelve years old                                                            | (Ref: No religion/Atheist/Agnostic)       |            |          |             | 0.259          |
|                                                                                           | Christianity                              | 0.985      | 0.010    | (0.97,1.01) |                |
|                                                                                           | Collapsed affiliations with prevalence<3% | 0.966      | 0.029    | (0.91,1.02) |                |

**Table S19e. Sweden: Sensitivity to unmeasured confounding of childhood predictors**

| Variable                                                                                 | Category                                                                                                                 | E-value for Estimate         | E-value for 95% CI           |
|------------------------------------------------------------------------------------------|--------------------------------------------------------------------------------------------------------------------------|------------------------------|------------------------------|
| Relationship with your mother growing up                                                 | (Ref: Very bad/somewhat bad)<br>Very good/somewhat good                                                                  | 1.07                         | 1.00                         |
| Relationship with your father growing up                                                 | (Ref: Very bad/somewhat bad)<br>Very good/somewhat good                                                                  | 1.11                         | 1.00                         |
| Parents married to each other when you were around 12 years old                          | (Ref: Parents married)<br>One or both of them had died<br>Parents were divorced<br>Parents were never married<br>Unsure  | 1.19<br>1.15<br>1.07<br>1.18 | 1.00<br>1.00<br>1.00<br>1.00 |
| Feelings about familys household income when growing up                                  | (Ref: Got by)<br>Found it difficult<br>Found it very difficult<br>Lived comfortably                                      | 1.16<br>1.13<br>1.20         | 1.00<br>1.00<br>1.11         |
| Physically or sexually abused when growing up                                            | (Ref: No)                                                                                                                | 1.21                         | 1.11                         |
| Felt like an outsider in your family when growing up                                     | (Ref: No)<br>Yes                                                                                                         | 1.16                         | 1.00                         |
| Your health when growing up                                                              | (Ref: Good)<br>Excellent<br>Fair<br>Poor<br>Very good                                                                    | 1.06<br>1.18<br>1.16<br>1.13 | 1.00<br>1.00<br>1.00<br>1.00 |
| Born in This country                                                                     | (Ref: Born in this country)<br>Born in another country                                                                   | 1.19                         | 1.00                         |
| How Often You Attended Religious Services or Worshiped When You Were Around 12 Years Old | (Ref: Never)<br>At least once a week<br>Less than once a month<br>One to three times a month                             | 1.47<br>1.39<br>1.36         | 1.37<br>1.34<br>1.25         |
| Year of birth (age group)                                                                | (Ref: 1998-2005; current age: 18-24)<br>1943 or earlier (current age: 80+ years)<br>1943-1953 (current age: 70-79 years) | 1.23<br>1.09                 | 1.00<br>1.00                 |

| Variable                       | Category                                  | E-value for Estimate | E-value for 95% CI |
|--------------------------------|-------------------------------------------|----------------------|--------------------|
| Religion when twelve years old | 1953-1963 (current age: 60-69 years)      | 1.12                 | 1.00               |
|                                | 1963-1973 (current age: 50-59 years)      | 1.11                 | 1.00               |
|                                | 1973-1983 (current age: 40-49 years)      | 1.08                 | 1.00               |
|                                | 1983-1993 (current age: 30-39 years)      | 1.01                 | 1.00               |
|                                | 1993-1998 (current age: 25-29 years)      | 1.16                 | 1.00               |
|                                | (Ref: No religion/Atheist/Agnostic)       |                      |                    |
|                                | Christianity                              | 1.14                 | 1.00               |
|                                | Collapsed affiliations with prevalence<3% | 1.23                 | 1.00               |

**Table S20a. Tanzania: Demographic descriptive statistics**

| <b>Characteristic</b>                    | <b>N = 6,577<sup>1</sup></b> |
|------------------------------------------|------------------------------|
| <b>Age group</b>                         |                              |
| 1943 or earlier (current age: 80+ years) | 62 (0.9%)                    |
| 1943-1953 (current age: 70-79 years)     | 195 (3.0%)                   |
| 1953-1963 (current age: 60-69 years)     | 389 (5.9%)                   |
| 1963-1973 (current age: 50-59 years)     | 618 (9.4%)                   |
| 1973-1983 (current age: 40-49 years)     | 1,058 (16%)                  |
| 1983-1993 (current age: 30-39 years)     | 1,446 (22%)                  |
| 1993-1998 (current age: 25-29 years)     | 924 (14%)                    |
| 1998-2005 (current age: 18-24 years)     | 1,884 (29%)                  |
| (Missing)                                | 2 (<0.1%)                    |
| <b>Gender</b>                            |                              |
| 1. Male                                  | 3,104 (47%)                  |
| 2. Female                                | 3,473 (53%)                  |
| 3. Other                                 | 0 (0%)                       |
| (Missing)                                | 0 (0%)                       |
| <b>Marital status</b>                    |                              |
| 1. Single/Never been married             | 1,745 (27%)                  |
| 2. Married                               | 3,982 (61%)                  |
| 3. Separated                             | 274 (4.2%)                   |
| 4. Divorced                              | 72 (1.1%)                    |
| 5. Widowed                               | 302 (4.6%)                   |
| 6. Domestic partner                      | 196 (3.0%)                   |
| (Missing)                                | 6 (<0.1%)                    |
| <b>Employment</b>                        |                              |
| 1. Employed for an employer              | 341 (5.2%)                   |
| 2. Self-employed                         | 3,321 (50%)                  |
| 3. Retired                               | 86 (1.3%)                    |
| 4. Student                               | 257 (3.9%)                   |
| 5. Homemaker                             | 1,296 (20%)                  |
| 6. Unemployed and looking for a job      | 1,138 (17%)                  |
| 7. None of these/Other                   | 133 (2.0%)                   |
| (Missing)                                | 5 (<0.1%)                    |
| <b>Religious service attendance</b>      |                              |
| 1. More than once a week                 | 1,825 (28%)                  |
| 2. Once a week                           | 3,134 (48%)                  |
| 3. One to three times a month            | 766 (12%)                    |
| 4. A few times a year                    | 628 (9.5%)                   |
| 5. Never                                 | 224 (3.4%)                   |
| (Missing)                                | 0 (<0.1%)                    |
| <b>Education</b>                         |                              |
| 1. Up to 8                               | 4,966 (76%)                  |
| 2. 9-15                                  | 1,545 (23%)                  |
| 3. 16+                                   | 66 (1.0%)                    |
| (Missing)                                | 0 (<0.1%)                    |
| <b>Immigration</b>                       |                              |
| 1. Born in this country                  | 6,562 (100%)                 |
| 2. Born in another country               | 14 (0.2%)                    |

| <b>Characteristic</b>                                       | <b>N = 6,577<sup>1</sup></b> |
|-------------------------------------------------------------|------------------------------|
| (Missing)                                                   | 2 (<0.1%)                    |
| <b>Religious affiliation</b>                                |                              |
| 1. Christianity                                             | 4,051 (62%)                  |
| 10. Taoism                                                  | 1 (<0.1%)                    |
| 11. Confucianism                                            | 0 (0%)                       |
| 12. Primal, Animist, or Folk religion                       | 10 (0.1%)                    |
| 13. Spiritism                                               | 0 (0%)                       |
| 14. Umbanda, Candomblé, and other African-derived religions | 0 (0%)                       |
| 15. Chinese folk/traditional religion                       | 0 (0%)                       |
| 2. Islam                                                    | 2,327 (35%)                  |
| 3. Hinduism                                                 | 0 (0%)                       |
| 4. Buddhism                                                 | 0 (0%)                       |
| 5. Judaism                                                  | 0 (0%)                       |
| 6. Sikhism                                                  | 0 (0%)                       |
| 7. Baha'i                                                   | 0 (0%)                       |
| 8. Jainism                                                  | 0 (0%)                       |
| 9. Shinto                                                   | 0 (0%)                       |
| 96. Some other religion                                     | 0 (0%)                       |
| 97. No religion/Atheist/Agnostic                            | 174 (2.6%)                   |
| (Missing)                                                   | 13 (0.2%)                    |
| <b>RACE ETHNICITY</b>                                       |                              |
| (Missing)                                                   | 2 (<0.1%)                    |
| 1801. Tanzania: African                                     | 6,562 (100%)                 |
| 1802. Tanzania: Indian                                      | 2 (<0.1%)                    |
| 1803. Tanzania: Arab                                        | 11 (0.2%)                    |

<sup>1</sup>n (%)

**Table S20b. Tanzania: Childhood descriptive statistics**

| <b>Characteristic</b>                      | <b>N = 6,577<sup>1</sup></b> |
|--------------------------------------------|------------------------------|
| <b>Age</b>                                 | 36 (15)                      |
| Unknown                                    | 2                            |
| <b>Year of birth</b>                       |                              |
| 1943 or earlier (current age: 80+ years)   | 62 (0.9%)                    |
| 1943-1953 (current age: 70-79 years)       | 195 (3.0%)                   |
| 1953-1963 (current age: 60-69 years)       | 389 (5.9%)                   |
| 1963-1973 (current age: 50-59 years)       | 618 (9.4%)                   |
| 1973-1983 (current age: 40-49 years)       | 1,058 (16%)                  |
| 1983-1993 (current age: 30-39 years)       | 1,446 (22%)                  |
| 1993-1998 (current age: 25-29 years)       | 924 (14%)                    |
| 1998-2005 (current age: 18-24 years)       | 1,884 (29%)                  |
| (Missing)                                  | 2 (<0.1%)                    |
| <b>Gender</b>                              |                              |
| 1. Male                                    | 3,104 (47%)                  |
| 2. Female                                  | 3,473 (53%)                  |
| 3. Other                                   | 0 (0%)                       |
| (Missing)                                  | 0 (0%)                       |
| <b>Parent marital status</b>               |                              |
| 1. Parents were married                    | 5,035 (77%)                  |
| 2. Parents were divorced                   | 514 (7.8%)                   |
| 3. Parents were never married              | 585 (8.9%)                   |
| 4. One or both of them had died            | 241 (3.7%)                   |
| 5. Unsure                                  | 18 (0.3%)                    |
| (Missing)                                  | 184 (2.8%)                   |
| <b>Age 12 religious service attendance</b> |                              |
| 1. At least once a week                    | 4,020 (61%)                  |
| 2. One to three times a month              | 1,738 (26%)                  |
| 3. Less than once a month                  | 247 (3.8%)                   |
| 4. Never                                   | 446 (6.8%)                   |
| (Missing)                                  | 127 (1.9%)                   |
| <b>Relationship with mother</b>            |                              |
| 1. Very good                               | 5,594 (85%)                  |
| 2. Somewhat good                           | 611 (9.3%)                   |
| 3. Somewhat bad                            | 60 (0.9%)                    |
| 4. Very bad                                | 60 (0.9%)                    |
| 97. (Does not apply)                       | 210 (3.2%)                   |
| (Missing)                                  | 42 (0.6%)                    |
| <b>Relationship with father</b>            |                              |
| 1. Very good                               | 4,931 (75%)                  |
| 2. Somewhat good                           | 804 (12%)                    |
| 3. Somewhat bad                            | 146 (2.2%)                   |
| 4. Very bad                                | 202 (3.1%)                   |
| 97. (Does not apply)                       | 396 (6.0%)                   |
| (Missing)                                  | 98 (1.5%)                    |
| <b>Outsider growing up</b>                 |                              |
| 1. Yes                                     | 493 (7.5%)                   |
| 2. No                                      | 6,066 (92%)                  |

| <b>Characteristic</b>                                       | <b>N = 6,577<sup>1</sup></b> |
|-------------------------------------------------------------|------------------------------|
| (Missing)                                                   | 18 (0.3%)                    |
| <b>Abuse</b>                                                |                              |
| 1. Yes                                                      | 557 (8.5%)                   |
| 2. No                                                       | 6,001 (91%)                  |
| (Missing)                                                   | 19 (0.3%)                    |
| <b>Self-rated health growing up</b>                         |                              |
| 1. Excellent                                                | 1,776 (27%)                  |
| 2. Very good                                                | 1,486 (23%)                  |
| 3. Good                                                     | 2,115 (32%)                  |
| 4. Fair                                                     | 839 (13%)                    |
| 5. Poor                                                     | 324 (4.9%)                   |
| (Missing)                                                   | 37 (0.6%)                    |
| <b>Immigration status</b>                                   |                              |
| 1. Born in this country                                     | 6,562 (100%)                 |
| 2. Born in another country                                  | 14 (0.2%)                    |
| (Missing)                                                   | 2 (<0.1%)                    |
| <b>Subjective financial status of family growing up</b>     |                              |
| 1. Lived comfortably                                        | 1,954 (30%)                  |
| 2. Got by                                                   | 2,059 (31%)                  |
| 3. Found it difficult                                       | 1,940 (29%)                  |
| 4. Found it very difficult                                  | 594 (9.0%)                   |
| (Missing)                                                   | 30 (0.5%)                    |
| <b>Religious affiliation</b>                                |                              |
| 1. Christianity                                             | 4,056 (62%)                  |
| 10. Taoism                                                  | 0 (0%)                       |
| 11. Confucianism                                            | 0 (0%)                       |
| 12. Primal, Animist, or Folk religion                       | 10 (0.2%)                    |
| 13. Spiritism                                               | 0 (0%)                       |
| 14. Umbanda, Candomblé, and other African-derived religions | 0 (0%)                       |
| 15. Chinese folk/traditional religion                       | 0 (0%)                       |
| 2. Islam                                                    | 2,237 (34%)                  |
| 3. Hinduism                                                 | 0 (0%)                       |
| 4. Buddhism                                                 | 0 (0%)                       |
| 5. Judaism                                                  | 0 (0%)                       |
| 6. Sikhism                                                  | 0 (0%)                       |
| 7. Baha'i                                                   | 0 (0%)                       |
| 8. Jainism                                                  | 0 (0%)                       |
| 9. Shinto                                                   | 0 (0%)                       |
| 96. Some other religion                                     | 0 (0%)                       |
| 97. No religion/Atheist/Agnostic                            | 269 (4.1%)                   |
| (Missing)                                                   | 5 (<0.1%)                    |
| <b>Race/Ethnicity</b>                                       |                              |
| (Missing)                                                   | 2 (<0.1%)                    |
| 1801. Tanzania: African                                     | 6,562 (100%)                 |
| 1802. Tanzania: Indian                                      | 2 (<0.1%)                    |
| 1803. Tanzania: Arab                                        | 11 (0.2%)                    |

<sup>1</sup>Mean (SD); n (%)

**Table S20c. Tanzania: Proportions by demographic category**

| Variable                     | Category                                 | Proportion | 95% CI         | SE    | p-value  |
|------------------------------|------------------------------------------|------------|----------------|-------|----------|
| Age group                    | 1998-2005 (current age: 18-24 years)     | 0.644      | (0.612, 0.677) | 0.017 | 5.33e-15 |
|                              | 1943 or earlier (current age: 80+ years) | 0.419      | (0.251, 0.587) | 0.084 |          |
|                              | 1943-1953 (current age: 70-79 years)     | 0.401      | (0.300, 0.502) | 0.051 |          |
|                              | 1953-1963 (current age: 60-69 years)     | 0.457      | (0.392, 0.522) | 0.033 |          |
|                              | 1963-1973 (current age: 50-59 years)     | 0.488      | (0.445, 0.532) | 0.022 |          |
|                              | 1973-1983 (current age: 40-49 years)     | 0.464      | (0.427, 0.501) | 0.019 |          |
|                              | 1983-1993 (current age: 30-39 years)     | 0.514      | (0.482, 0.547) | 0.016 |          |
|                              | 1993-1998 (current age: 25-29 years)     | 0.620      | (0.579, 0.662) | 0.021 |          |
|                              | Male                                     | 0.597      | (0.572, 0.622) | 0.013 |          |
|                              | Female                                   | 0.505      | (0.480, 0.530) | 0.013 |          |
| Gender                       | Other                                    | *          | *              | *     | 1.33e-08 |
| Marital status               | Single/Never been married                | 0.656      | (0.626, 0.686) | 0.015 | 6.13e-12 |
|                              | Divorced                                 | 0.370      | (0.237, 0.502) | 0.066 |          |
|                              | Domestic partner                         | 0.511      | (0.426, 0.596) | 0.043 |          |
|                              | Married                                  | 0.513      | (0.488, 0.537) | 0.012 |          |
|                              | Separated                                | 0.527      | (0.458, 0.597) | 0.035 |          |
|                              | Widowed                                  | 0.480      | (0.403, 0.557) | 0.039 |          |
|                              | Employed for an employer                 | 0.697      | (0.638, 0.756) | 0.030 | < 1e-16  |
| Employment                   | Homemaker                                | 0.444      | (0.406, 0.481) | 0.019 |          |
|                              | None of these/Other                      | 0.412      | (0.310, 0.515) | 0.052 |          |
|                              | Retired                                  | 0.404      | (0.294, 0.515) | 0.055 |          |
|                              | Self-employed                            | 0.550      | (0.523, 0.576) | 0.013 |          |
|                              | Student                                  | 0.757      | (0.687, 0.827) | 0.035 |          |
|                              | Unemployed and looking for a job         | 0.598      | (0.561, 0.636) | 0.019 |          |
| Religious service attendance | Never                                    | 0.434      | (0.352, 0.515) | 0.041 | 1.69e-02 |
|                              | A few times a year                       | 0.574      | (0.525, 0.623) | 0.025 |          |
|                              | More than once a week                    | 0.562      | (0.528, 0.596) | 0.017 |          |
|                              | Once a week                              | 0.552      | (0.525, 0.579) | 0.014 |          |
|                              | One to three times a month               | 0.514      | (0.470, 0.558) | 0.023 |          |
| Education                    | 9-15                                     | 0.709      | (0.683, 0.734) | 0.013 | < 1e-16  |
|                              | 16+                                      | 0.779      | (0.673, 0.886) | 0.053 |          |

| Variable                 | Category                                                          | Proportion | 95% CI         | SE    | p-value  |
|--------------------------|-------------------------------------------------------------------|------------|----------------|-------|----------|
| Immigration status       | Up to 8<br>Born in this<br>country                                | 0.495      | (0.472, 0.519) | 0.012 | 5.27e-01 |
|                          | Born in another<br>country                                        | 0.548      | (0.529, 0.568) | 0.010 |          |
|                          | No<br>religion/Atheist/Ag<br>nostic                               | 0.443      | (0.066, 0.820) | 0.167 |          |
| Religious<br>affiliation | Christianity                                                      | *          | *              | *     | 7.52e-05 |
|                          | Combined                                                          | 0.580      | (0.556, 0.604) | 0.012 |          |
|                          | Spiritism                                                         | 0.447      | (0.329, 0.566) | 0.060 |          |
|                          | Umbanda,<br>Candomblé, and<br>other African-<br>derived religions | *          | *              | *     |          |
|                          | Buddhism                                                          | *          | *              | *     |          |
|                          | Islam                                                             | 0.501      | (0.470, 0.533) | 0.016 |          |
|                          | Chinese<br>folk/traditional<br>religion                           | *          | *              | *     |          |
|                          | Hinduism                                                          | *          | *              | *     |          |
|                          | Judaism                                                           | *          | *              | *     |          |
|                          | Primal, Animist, or<br>Folk religion                              | *          | *              | *     |          |

**Table S20d. Tanzania: Childhood predictors regression analysis**

| Variable                                                        | Category                                                                                                                | Risk-Ratio                       | logRR SE                         | RR 95% CI                                                | Global p-value |
|-----------------------------------------------------------------|-------------------------------------------------------------------------------------------------------------------------|----------------------------------|----------------------------------|----------------------------------------------------------|----------------|
| Relationship with your mother growing up                        | (Ref: Very bad/somewhat bad)<br>Very good/somewhat good                                                                 | 1.006                            | 0.045                            | (0.92,1.10)                                              | 0.596          |
| Relationship with your father growing up                        | (Ref: Very bad/somewhat bad)<br>Very good/somewhat good                                                                 | 1.021                            | 0.035                            | (0.95,1.09)                                              | 0.499          |
| Parents married to each other when you were around 12 years old | (Ref: Parents married)<br>One or both of them had died<br>Parents were divorced<br>Parents were never married<br>Unsure | 0.978<br>0.992<br>0.981<br>0.916 | 0.040<br>0.031<br>0.029<br>0.146 | (0.90,1.06)<br>(0.93,1.06)<br>(0.93,1.04)<br>(0.69,1.22) | 0.733          |
| Feelings about familys household income when growing up         | (Ref: Got by)<br>Found it difficult<br>Found it very difficult<br>Lived comfortably                                     | 0.964<br>0.905<br>1.024          | 0.021<br>0.029<br>0.019          | (0.93,1.00)<br>(0.85,0.96)<br>(0.99,1.06)                | 0.002          |
| Physically or sexually abused when growing up                   | (Ref: No)                                                                                                               | 1.064                            | 0.030                            | (1.00,1.13)                                              | 0.045          |
| Felt like an outsider in your family when growing up            | (Ref: No)<br>Yes                                                                                                        | 1.015                            | 0.027                            | (0.96,1.07)                                              | 0.506          |
| Your health when growing up                                     | (Ref: Good)<br>Excellent<br>Fair<br>Poor<br>Very good                                                                   | 1.072<br>1.054<br>0.947<br>1.026 | 0.024<br>0.025<br>0.038<br>0.022 | (1.02,1.12)<br>(1.00,1.11)<br>(0.88,1.02)<br>(0.98,1.07) | 0.012          |
| Born in This                                                    | (Ref: Born in this                                                                                                      |                                  |                                  |                                                          | 0.375          |

| Variable                                                                                  | Category                                  | Risk-Ratio | logRR SE | RR 95% CI   | Global p-value |
|-------------------------------------------------------------------------------------------|-------------------------------------------|------------|----------|-------------|----------------|
| country                                                                                   | country)                                  |            |          |             |                |
|                                                                                           | Born in another country                   | 0.860      | 0.158    | (0.63,1.17) |                |
| How Often You Attended Religious Services or Worshipped When You Were Around 12 Years Old | (Ref: Never)                              |            |          |             | 0.001          |
|                                                                                           | At least once a week                      | 1.156      | 0.042    | (1.06,1.26) |                |
|                                                                                           | Less than once a month                    | 1.188      | 0.054    | (1.07,1.32) |                |
|                                                                                           | One to three times a month                | 1.143      | 0.045    | (1.05,1.25) |                |
| Year of birth (age group)                                                                 | (Ref: 1998-2005; current age: 18-24)      |            |          |             | 2.69e-11       |
|                                                                                           | 1943 or earlier (current age: 80+ years)  | 0.801      | 0.083    | (0.68,0.94) |                |
|                                                                                           | 1943-1953 (current age: 70-79 years)      | 0.798      | 0.053    | (0.72,0.89) |                |
|                                                                                           | 1953-1963 (current age: 60-69 years)      | 0.839      | 0.036    | (0.78,0.90) |                |
|                                                                                           | 1963-1973 (current age: 50-59 years)      | 0.876      | 0.028    | (0.83,0.92) |                |
|                                                                                           | 1973-1983 (current age: 40-49 years)      | 0.852      | 0.023    | (0.81,0.89) |                |
|                                                                                           | 1983-1993 (current age: 30-39 years)      | 0.890      | 0.022    | (0.85,0.93) |                |
|                                                                                           | 1993-1998 (current age: 25-29 years)      | 0.977      | 0.028    | (0.92,1.03) |                |
| Religion when twelve years old                                                            | (Ref: No religion/Atheist/Agnostic)       |            |          |             | 0.662          |
|                                                                                           | Christianity                              | 0.988      | 0.065    | (0.87,1.12) |                |
|                                                                                           | Collapsed affiliations with prevalence<3% | 1.005      | 0.194    | (0.69,1.47) |                |
|                                                                                           | Islam                                     | 0.935      | 0.065    | (0.82,1.06) |                |
| Race plurality (prominent race/ethnic group [0] or not [1])                               | (Ref: Plurality group)                    |            |          |             | 0.408          |
|                                                                                           | Non-plurality groups                      | 0.849      | 0.190    | (0.59,1.23) |                |

**Table S20e. Tanzania: Sensitivity to unmeasured confounding of childhood predictors**

| Variable                                                                                  | Category                                                                                                                 | E-value for Estimate         | E-value for 95% CI           |
|-------------------------------------------------------------------------------------------|--------------------------------------------------------------------------------------------------------------------------|------------------------------|------------------------------|
| Relationship with your mother growing up                                                  | (Ref: Very bad/somewhat bad)<br>Very good/somewhat good                                                                  | 1.08                         | 1.00                         |
| Relationship with your father growing up                                                  | (Ref: Very bad/somewhat bad)<br>Very good/somewhat good                                                                  | 1.17                         | 1.00                         |
| Parents married to each other when you were around 12 years old                           | (Ref: Parents married)<br>One or both of them had died<br>Parents were divorced<br>Parents were never married<br>Unsure  | 1.18<br>1.10<br>1.16<br>1.41 | 1.00<br>1.00<br>1.00<br>1.00 |
| Feelings about family household income when growing up                                    | (Ref: Got by)<br>Found it difficult<br>Found it very difficult<br>Lived comfortably                                      | 1.23<br>1.45<br>1.18         | 1.00<br>1.25<br>1.00         |
| Physically or sexually abused when growing up                                             | (Ref: No)                                                                                                                | 1.32                         | 1.06                         |
| Felt like an outsider in your family when growing up                                      | (Ref: No)<br>Yes                                                                                                         | 1.14                         | 1.00                         |
| Your health when growing up                                                               | (Ref: Good)<br>Excellent<br>Fair<br>Poor<br>Very good                                                                    | 1.35<br>1.29<br>1.30<br>1.19 | 1.18<br>1.07<br>1.00<br>1.00 |
| Born in This country                                                                      | (Ref: Born in this country)<br>Born in another country                                                                   | 1.60                         | 1.00                         |
| How Often You Attended Religious Services or Worshipped When You Were Around 12 Years Old | (Ref: Never)<br>At least once a week<br>Less than once a month<br>One to three times a month                             | 1.58<br>1.66<br>1.55         | 1.33<br>1.34<br>1.27         |
| Year of birth (age group)                                                                 | (Ref: 1998-2005; current age: 18-24)<br>1943 or earlier (current age: 80+ years)<br>1943-1953 (current age: 70-79 years) | 1.80<br>1.82                 | 1.32<br>1.51                 |

| Variable                                                    | Category                                  | E-value for Estimate | E-value for 95% CI |
|-------------------------------------------------------------|-------------------------------------------|----------------------|--------------------|
|                                                             | 1953-1963 (current age: 60-69 years)      | 1.67                 | 1.46               |
|                                                             | 1963-1973 (current age: 50-59 years)      | 1.54                 | 1.38               |
|                                                             | 1973-1983 (current age: 40-49 years)      | 1.63                 | 1.49               |
|                                                             | 1983-1993 (current age: 30-39 years)      | 1.50                 | 1.36               |
|                                                             | 1993-1998 (current age: 25-29 years)      | 1.18                 | 1.00               |
| Religion when twelve years old                              | (Ref: No religion/Atheist/Agnostic)       |                      |                    |
|                                                             | Christianity                              | 1.12                 | 1.00               |
|                                                             | Collapsed affiliations with prevalence<3% | 1.07                 | 1.00               |
|                                                             | Islam                                     | 1.34                 | 1.00               |
| Race plurality (prominent race/ethnic group [0] or not [1]) | (Ref: Plurality group)                    |                      |                    |
|                                                             | Non-plurality groups                      | 1.64                 | 1.00               |

**Table S21a. Turkey: Demographic descriptive statistics**

| <b>Characteristic</b>                    | <b>N = 659<sup>1</sup></b> |
|------------------------------------------|----------------------------|
| <b>Age group</b>                         |                            |
| 1943 or earlier (current age: 80+ years) | 10 (1.5%)                  |
| 1943-1953 (current age: 70-79 years)     | 38 (5.8%)                  |
| 1953-1963 (current age: 60-69 years)     | 67 (10%)                   |
| 1963-1973 (current age: 50-59 years)     | 100 (15%)                  |
| 1973-1983 (current age: 40-49 years)     | 124 (19%)                  |
| 1983-1993 (current age: 30-39 years)     | 144 (22%)                  |
| 1993-1998 (current age: 25-29 years)     | 72 (11%)                   |
| 1998-2005 (current age: 18-24 years)     | 104 (16%)                  |
| (Missing)                                | 0 (0%)                     |
| <b>Gender</b>                            |                            |
| 1. Male                                  | 330 (50%)                  |
| 2. Female                                | 329 (50%)                  |
| 3. Other                                 | 0 (0%)                     |
| (Missing)                                | 0 (0%)                     |
| <b>Marital status</b>                    |                            |
| 1. Single/Never been married             | 168 (26%)                  |
| 2. Married                               | 421 (64%)                  |
| 3. Separated                             | 5 (0.8%)                   |
| 4. Divorced                              | 29 (4.4%)                  |
| 5. Widowed                               | 32 (4.9%)                  |
| 6. Domestic partner                      | 0 (0%)                     |
| (Missing)                                | 3 (0.4%)                   |
| <b>Employment</b>                        |                            |
| 1. Employed for an employer              | 187 (28%)                  |
| 2. Self-employed                         | 103 (16%)                  |
| 3. Retired                               | 88 (13%)                   |
| 4. Student                               | 53 (8.0%)                  |
| 5. Homemaker                             | 157 (24%)                  |
| 6. Unemployed and looking for a job      | 38 (5.8%)                  |
| 7. None of these/Other                   | 32 (4.9%)                  |
| (Missing)                                | 0 (0%)                     |
| <b>Religious service attendance</b>      |                            |
| 1. More than once a week                 | 224 (34%)                  |
| 2. Once a week                           | 129 (20%)                  |
| 3. One to three times a month            | 70 (11%)                   |
| 4. A few times a year                    | 104 (16%)                  |
| 5. Never                                 | 129 (20%)                  |
| (Missing)                                | 3 (0.4%)                   |
| <b>Education</b>                         |                            |
| 1. Up to 8                               | 200 (30%)                  |
| 2. 9-15                                  | 329 (50%)                  |
| 3. 16+                                   | 130 (20%)                  |
| (Missing)                                | 0 (0%)                     |
| <b>Immigration</b>                       |                            |
| 1. Born in this country                  | 621 (94%)                  |
| 2. Born in another country               | 38 (5.8%)                  |

| <b>Characteristic</b>                                       | <b>N = 659<sup>1</sup></b> |
|-------------------------------------------------------------|----------------------------|
| (Missing)                                                   | 0 (0%)                     |
| <b>Religious affiliation</b>                                |                            |
| 1. Christianity                                             | 1 (0.2%)                   |
| 10. Taoism                                                  | 0 (0%)                     |
| 11. Confucianism                                            | 0 (0%)                     |
| 12. Primal, Animist, or Folk religion                       | 0 (<0.1%)                  |
| 13. Spiritism                                               | 0 (0%)                     |
| 14. Umbanda, Candomblé, and other African-derived religions | 0 (0%)                     |
| 15. Chinese folk/traditional religion                       | 0 (0%)                     |
| 2. Islam                                                    | 618 (94%)                  |
| 3. Hinduism                                                 | 0 (0%)                     |
| 4. Buddhism                                                 | 0 (<0.1%)                  |
| 5. Judaism                                                  | 1 (0.1%)                   |
| 6. Sikhism                                                  | 1 (<0.1%)                  |
| 7. Baha'i                                                   | 0 (0%)                     |
| 8. Jainism                                                  | 0 (0%)                     |
| 9. Shinto                                                   | 0 (0%)                     |
| 96. Some other religion                                     | 0 (0%)                     |
| 97. No religion/Atheist/Agnostic                            | 30 (4.5%)                  |
| (Missing)                                                   | 8 (1.2%)                   |
| <b>RACE ETHNICITY</b>                                       |                            |
| (Missing)                                                   | 4 (0.6%)                   |
| 1901. Turkey: Turkish                                       | 435 (66%)                  |
| 1902. Turkey: Kurdish/Zaza                                  | 112 (17%)                  |
| 1903. Turkey: Arab                                          | 33 (5.0%)                  |
| 1904. Turkey: Laz                                           | 21 (3.1%)                  |
| 1905. Turkey: Circassian                                    | 7 (1.0%)                   |
| 1906. Turkey: Bosnian                                       | 1 (0.2%)                   |
| 1907. Turkey: Armenian                                      | 1 (0.1%)                   |
| 1908. Turkey: Georgian                                      | 1 (0.2%)                   |
| 1911. Turkey: Albanian                                      | 2 (0.4%)                   |
| 1913. Turkey: Azeri                                         | 5 (0.8%)                   |
| 9996. Other                                                 | 36 (5.5%)                  |

<sup>1</sup>n (%)

**Table S21b. Turkey: Childhood descriptive statistics**

| <b>Characteristic</b>                      | <b>N = 659<sup>1</sup></b> |
|--------------------------------------------|----------------------------|
| <b>Age</b>                                 | 42 (16)                    |
| <b>Year of birth</b>                       |                            |
| 1943 or earlier (current age: 80+ years)   | 10 (1.5%)                  |
| 1943-1953 (current age: 70-79 years)       | 38 (5.8%)                  |
| 1953-1963 (current age: 60-69 years)       | 67 (10%)                   |
| 1963-1973 (current age: 50-59 years)       | 100 (15%)                  |
| 1973-1983 (current age: 40-49 years)       | 124 (19%)                  |
| 1983-1993 (current age: 30-39 years)       | 144 (22%)                  |
| 1993-1998 (current age: 25-29 years)       | 72 (11%)                   |
| 1998-2005 (current age: 18-24 years)       | 104 (16%)                  |
| (Missing)                                  | 0 (0%)                     |
| <b>Gender</b>                              |                            |
| 1. Male                                    | 330 (50%)                  |
| 2. Female                                  | 329 (50%)                  |
| 3. Other                                   | 0 (0%)                     |
| (Missing)                                  | 0 (0%)                     |
| <b>Parent marital status</b>               |                            |
| 1. Parents were married                    | 595 (90%)                  |
| 2. Parents were divorced                   | 30 (4.5%)                  |
| 3. Parents were never married              | 2 (0.3%)                   |
| 4. One or both of them had died            | 27 (4.1%)                  |
| 5. Unsure                                  | 3 (0.4%)                   |
| (Missing)                                  | 2 (0.3%)                   |
| <b>Age 12 religious service attendance</b> |                            |
| 1. At least once a week                    | 263 (40%)                  |
| 2. One to three times a month              | 118 (18%)                  |
| 3. Less than once a month                  | 88 (13%)                   |
| 4. Never                                   | 185 (28%)                  |
| (Missing)                                  | 5 (0.7%)                   |
| <b>Relationship with mother</b>            |                            |
| 1. Very good                               | 429 (65%)                  |
| 2. Somewhat good                           | 190 (29%)                  |
| 3. Somewhat bad                            | 17 (2.6%)                  |
| 4. Very bad                                | 8 (1.3%)                   |
| 97. (Does not apply)                       | 13 (2.0%)                  |
| (Missing)                                  | 2 (0.3%)                   |
| <b>Relationship with father</b>            |                            |
| 1. Very good                               | 343 (52%)                  |
| 2. Somewhat good                           | 188 (29%)                  |
| 3. Somewhat bad                            | 30 (4.5%)                  |
| 4. Very bad                                | 53 (8.1%)                  |
| 97. (Does not apply)                       | 30 (4.5%)                  |
| (Missing)                                  | 15 (2.3%)                  |
| <b>Outsider growing up</b>                 |                            |
| 1. Yes                                     | 72 (11%)                   |
| 2. No                                      | 580 (88%)                  |
| (Missing)                                  | 7 (1.1%)                   |

| Characteristic                                              | N = 659 <sup>1</sup> |
|-------------------------------------------------------------|----------------------|
| <b>Abuse</b>                                                |                      |
| 1. Yes                                                      | 70 (11%)             |
| 2. No                                                       | 581 (88%)            |
| (Missing)                                                   | 7 (1.1%)             |
| <b>Self-rated health growing up</b>                         |                      |
| 1. Excellent                                                | 144 (22%)            |
| 2. Very good                                                | 202 (31%)            |
| 3. Good                                                     | 183 (28%)            |
| 4. Fair                                                     | 109 (16%)            |
| 5. Poor                                                     | 21 (3.2%)            |
| (Missing)                                                   | 1 (0.1%)             |
| <b>Immigration status</b>                                   |                      |
| 1. Born in this country                                     | 621 (94%)            |
| 2. Born in another country                                  | 38 (5.8%)            |
| (Missing)                                                   | 0 (0%)               |
| <b>Subjective financial status of family growing up</b>     |                      |
| 1. Lived comfortably                                        | 233 (35%)            |
| 2. Got by                                                   | 287 (43%)            |
| 3. Found it difficult                                       | 84 (13%)             |
| 4. Found it very difficult                                  | 55 (8.3%)            |
| (Missing)                                                   | 0 (0%)               |
| <b>Religious affiliation</b>                                |                      |
| 1. Christianity                                             | 1 (0.1%)             |
| 10. Taoism                                                  | 0 (0%)               |
| 11. Confucianism                                            | 0 (0%)               |
| 12. Primal, Animist, or Folk religion                       | 0 (0%)               |
| 13. Spiritism                                               | 0 (0%)               |
| 14. Umbanda, Candomblé, and other African-derived religions | 0 (0%)               |
| 15. Chinese folk/traditional religion                       | 0 (0%)               |
| 2. Islam                                                    | 647 (98%)            |
| 3. Hinduism                                                 | 0 (0%)               |
| 4. Buddhism                                                 | 0 (0%)               |
| 5. Judaism                                                  | 1 (0.1%)             |
| 6. Sikhism                                                  | 0 (0%)               |
| 7. Baha'i                                                   | 0 (0%)               |
| 8. Jainism                                                  | 0 (0%)               |
| 9. Shinto                                                   | 0 (0%)               |
| 96. Some other religion                                     | 0 (0%)               |
| 97. No religion/Atheist/Agnostic                            | 3 (0.5%)             |
| (Missing)                                                   | 7 (1.1%)             |
| <b>Race/Ethnicity</b>                                       |                      |
| (Missing)                                                   | 4 (0.6%)             |
| 1901. Turkey: Turkish                                       | 435 (66%)            |
| 1902. Turkey: Kurdish/Zaza                                  | 112 (17%)            |
| 1903. Turkey: Arab                                          | 33 (5.0%)            |
| 1904. Turkey: Laz                                           | 21 (3.1%)            |
| 1905. Turkey: Circassian                                    | 7 (1.0%)             |

| Characteristic         | N = 659 <sup>1</sup> |
|------------------------|----------------------|
| 1906. Turkey: Bosnian  | 1 (0.2%)             |
| 1907. Turkey: Armenian | 1 (0.1%)             |
| 1908. Turkey: Georgian | 1 (0.2%)             |
| 1911. Turkey: Albanian | 2 (0.4%)             |
| 1913. Turkey: Azeri    | 5 (0.8%)             |
| 9996. Other            | 36 (5.5%)            |

<sup>1</sup>Mean (SD); n (%)



**Table S21c. Turkey: Proportions by demographic category**

| Variable                         | Category                                 | Proportion                | 95% CI         | SE             | p-value  |          |          |
|----------------------------------|------------------------------------------|---------------------------|----------------|----------------|----------|----------|----------|
| Age group                        | 1998-2005 (current age: 18-24 years)     | 0.749                     | (0.640, 0.858) | 0.055          | 4.89e-01 |          |          |
|                                  | 1943 or earlier (current age: 80+ years) | 0.826                     | *              | *              |          |          |          |
|                                  | 1943-1953 (current age: 70-79 years)     | 0.529                     | (0.253, 0.805) | 0.135          |          |          |          |
|                                  | 1953-1963 (current age: 60-69 years)     | 0.712                     | (0.553, 0.870) | 0.079          |          |          |          |
|                                  | 1963-1973 (current age: 50-59 years)     | 0.688                     | (0.576, 0.801) | 0.057          |          |          |          |
|                                  | 1973-1983 (current age: 40-49 years)     | 0.786                     | (0.704, 0.868) | 0.042          |          |          |          |
|                                  | 1983-1993 (current age: 30-39 years)     | 0.701                     | (0.618, 0.783) | 0.042          |          |          |          |
|                                  | 1993-1998 (current age: 25-29 years)     | 0.781                     | (0.665, 0.896) | 0.058          |          |          |          |
|                                  | Gender                                   | Male                      | 0.706          | (0.649, 0.763) |          | 0.029    | 4.16e-01 |
|                                  |                                          | Female                    | 0.742          | (0.675, 0.809) |          | 0.034    |          |
| Other                            |                                          | *                         | *              | *              |          |          |          |
| Marital status                   |                                          | Single/Never been married | 0.737          | (0.664, 0.811) | 0.037    | 7.69e-01 |          |
|                                  | Divorced                                 | 0.594                     | (0.360, 0.828) | 0.113          |          |          |          |
|                                  | Domestic partner                         | *                         | *              | *              |          |          |          |
|                                  | Married                                  | 0.731                     | (0.676, 0.785) | 0.028          |          |          |          |
|                                  | Separated                                | 0.567                     | *              | *              |          |          |          |
|                                  | Widowed                                  | 0.710                     | (0.441, 0.978) | 0.130          |          |          |          |
|                                  | Employment                               | Employed for an employer  | 0.717          | (0.644, 0.790) | 0.037    |          | 9.06e-01 |
| Homemaker                        |                                          | 0.743                     | (0.643, 0.842) | 0.050          |          |          |          |
| None of these/Other              |                                          | 0.638                     | (0.417, 0.859) | 0.107          |          |          |          |
| Retired                          |                                          | 0.753                     | (0.621, 0.886) | 0.066          |          |          |          |
| Self-employed                    |                                          | 0.706                     | (0.600, 0.812) | 0.053          |          |          |          |
| Student                          |                                          | 0.692                     | (0.540, 0.844) | 0.075          |          |          |          |
| Unemployed and looking for a job |                                          | 0.780                     | (0.634, 0.926) | 0.071          |          |          |          |
| Religious service attendance     |                                          | Never                     | 0.651          | (0.546, 0.757) | 0.053    | 2.77e-02 |          |
|                                  | A few times a year                       | 0.700                     | (0.591, 0.809) | 0.055          |          |          |          |
|                                  | More than once a week                    | 0.721                     | (0.647, 0.795) | 0.038          |          |          |          |
|                                  | Once a week                              | 0.838                     | (0.765, 0.911) | 0.037          |          |          |          |
|                                  | One to three times a month               | 0.693                     | (0.545, 0.841) | 0.074          |          |          |          |
|                                  | Education                                | 9-15                      | 0.730          | (0.667, 0.792) | 0.032    |          | 5.15e-01 |
| 16+                              |                                          | 0.756                     | (0.698, 0.814) | 0.030          |          |          |          |

| Variable                 | Category                                                          | Proportion | 95% CI         | SE    | p-value  |
|--------------------------|-------------------------------------------------------------------|------------|----------------|-------|----------|
| Immigration status       | Up to 8<br>Born in this<br>country                                | 0.694      | (0.599, 0.788) | 0.048 | 8.06e-01 |
|                          | Born in another<br>country                                        | 0.725      | (0.680, 0.770) | 0.023 |          |
|                          | No<br>religion/Atheist/Ag<br>nostic                               | 0.706      | (0.494, 0.918) | 0.104 |          |
| Religious<br>affiliation | Christianity                                                      | 0.634      | (0.417, 0.851) | 0.105 | < 1e-16  |
|                          | Combined                                                          | *          | *              | *     |          |
|                          | Spiritism                                                         | 0.985      | *              | *     |          |
|                          | Umbanda,<br>Candomblé, and<br>other African-<br>derived religions | *          | *              | *     |          |
|                          | Buddhism                                                          | *          | *              | *     |          |
|                          | Islam                                                             | 0.727      | (0.682, 0.772) | 0.023 |          |
|                          | Chinese<br>folk/traditional<br>religion                           | *          | *              | *     |          |
|                          | Hinduism                                                          | *          | *              | *     |          |
|                          | Judaism                                                           | *          | *              | *     |          |
|                          | Primal, Animist, or<br>Folk religion                              | *          | *              | *     |          |

**Table S21d. Turkey: Childhood predictors regression analysis**

| Variable                                                        | Category                     | Risk-Ratio | logRR SE | RR 95% CI   | Global p-value |
|-----------------------------------------------------------------|------------------------------|------------|----------|-------------|----------------|
| Relationship with your mother growing up                        | (Ref: Very bad/somewhat bad) |            |          |             | 0.507          |
|                                                                 | Very good/somewhat good      | 1.064      | 0.113    | (0.85,1.33) |                |
| Relationship with your father growing up                        | (Ref: Very bad/somewhat bad) |            |          |             | 0.608          |
|                                                                 | Very good/somewhat good      | 0.997      | 0.070    | (0.87,1.14) |                |
| Parents married to each other when you were around 12 years old | (Ref: Parents married)       |            |          |             | 5.35e-06       |
|                                                                 | One or both of them had died | 1.113      | 0.168    | (0.80,1.55) |                |
|                                                                 | Parents were divorced        | 1.097      | 0.099    | (0.90,1.33) |                |
|                                                                 | Parents were never married   | 1.352      | 0.062    | (1.20,1.53) |                |
|                                                                 | Unsure                       | 0.914      | 0.256    | (0.55,1.51) |                |
| Feelings about familys household income when growing up         | (Ref: Got by)                |            |          |             | 0.060          |
|                                                                 | Found it difficult           | 0.896      | 0.070    | (0.78,1.03) |                |
|                                                                 | Found it very difficult      | 0.809      | 0.090    | (0.68,0.97) |                |
|                                                                 | Lived comfortably            | 0.988      | 0.047    | (0.90,1.08) |                |
| Physically or sexually abused when growing up                   | (Ref: No)                    |            |          |             | 0.449          |
|                                                                 |                              | 1.052      | 0.068    | (0.92,1.20) |                |
| Felt like an outsider in your family when growing up            | (Ref: No)                    |            |          |             | 0.586          |
|                                                                 | Yes                          | 1.013      | 0.066    | (0.89,1.15) |                |
| Your health when growing up                                     | (Ref: Good)                  |            |          |             | 0.222          |
|                                                                 | Excellent                    | 0.992      | 0.060    | (0.88,1.12) |                |
|                                                                 | Fair                         | 0.866      | 0.070    | (0.75,0.99) |                |
|                                                                 | Poor                         | 1.008      | 0.114    | (0.81,1.26) |                |
| Born in This                                                    | Very good                    | 1.015      | 0.058    | (0.91,1.14) | 0.606          |
|                                                                 | (Ref: Born in this           |            |          |             |                |

| Variable                                                                                  | Category                                  | Risk-Ratio | logRR SE | RR 95% CI   | Global p-value |
|-------------------------------------------------------------------------------------------|-------------------------------------------|------------|----------|-------------|----------------|
| country                                                                                   | country)                                  |            |          |             |                |
|                                                                                           | Born in another country                   | 0.994      | 0.105    | (0.81,1.22) |                |
| How Often You Attended Religious Services or Worshipped When You Were Around 12 Years Old | (Ref: Never)                              |            |          |             | 0.739          |
|                                                                                           | At least once a week                      | 0.977      | 0.054    | (0.88,1.09) |                |
|                                                                                           | Less than once a month                    | 1.027      | 0.064    | (0.91,1.17) |                |
|                                                                                           | One to three times a month                | 1.011      | 0.061    | (0.90,1.14) |                |
| Year of birth (age group)                                                                 | (Ref: 1998-2005; current age: 18-24)      |            |          |             | 0.665          |
|                                                                                           | 1943 or earlier (current age: 80+ years)  | 1.085      | 0.166    | (0.78,1.50) |                |
|                                                                                           | 1943-1953 (current age: 70-79 years)      | 0.809      | 0.135    | (0.62,1.05) |                |
|                                                                                           | 1953-1963 (current age: 60-69 years)      | 0.997      | 0.097    | (0.82,1.21) |                |
|                                                                                           | 1963-1973 (current age: 50-59 years)      | 0.983      | 0.079    | (0.84,1.15) |                |
|                                                                                           | 1973-1983 (current age: 40-49 years)      | 1.074      | 0.074    | (0.93,1.24) |                |
|                                                                                           | 1983-1993 (current age: 30-39 years)      | 0.978      | 0.074    | (0.85,1.13) |                |
|                                                                                           | 1993-1998 (current age: 25-29 years)      | 1.049      | 0.080    | (0.90,1.23) |                |
| Religion when twelve years old                                                            | (Ref:)                                    |            |          |             | 8.68e-04       |
|                                                                                           | Collapsed affiliations with prevalence<3% | 1.244      | 0.065    | (1.10,1.41) |                |

**Table S21e. Turkey: Sensitivity to unmeasured confounding of childhood predictors**

| Variable                                                                                 | Category                                 | E-value for Estimate | E-value for 95% CI |
|------------------------------------------------------------------------------------------|------------------------------------------|----------------------|--------------------|
| Relationship with your mother growing up                                                 | (Ref: Very bad/somewhat bad)             |                      |                    |
|                                                                                          | Very good/somewhat good                  | 1.33                 | 1.00               |
| Relationship with your father growing up                                                 | (Ref: Very bad/somewhat bad)             |                      |                    |
|                                                                                          | Very good/somewhat good                  | 1.06                 | 1.00               |
| Parents married to each other when you were around 12 years old                          | (Ref: Parents married)                   |                      |                    |
|                                                                                          | One or both of them had died             | 1.47                 | 1.00               |
|                                                                                          | Parents were divorced                    | 1.42                 | 1.00               |
|                                                                                          | Parents were never married               | 2.04                 | 1.68               |
|                                                                                          | Unsure                                   | 1.41                 | 1.00               |
| Feelings about familys household income when growing up                                  | (Ref: Got by)                            |                      |                    |
|                                                                                          | Found it difficult                       | 1.47                 | 1.00               |
|                                                                                          | Found it very difficult                  | 1.77                 | 1.23               |
|                                                                                          | Lived comfortably                        | 1.12                 | 1.00               |
| Physically or sexually abused when growing up                                            | (Ref: No)                                |                      |                    |
|                                                                                          |                                          | 1.29                 | 1.00               |
| Felt like an outsider in your family when growing up                                     | (Ref: No)                                |                      |                    |
|                                                                                          | Yes                                      | 1.13                 | 1.00               |
| Your health when growing up                                                              | (Ref: Good)                              |                      |                    |
|                                                                                          | Excellent                                | 1.10                 | 1.00               |
|                                                                                          | Fair                                     | 1.58                 | 1.08               |
|                                                                                          | Poor                                     | 1.10                 | 1.00               |
|                                                                                          | Very good                                | 1.14                 | 1.00               |
| Born in This country                                                                     | (Ref: Born in this country)              |                      |                    |
|                                                                                          | Born in another country                  | 1.09                 | 1.00               |
| How Often You Attended Religious Services or Worshiped When You Were Around 12 Years Old | (Ref: Never)                             |                      |                    |
|                                                                                          | At least once a week                     | 1.18                 | 1.00               |
|                                                                                          | Less than once a month                   | 1.19                 | 1.00               |
|                                                                                          | One to three times a month               | 1.12                 | 1.00               |
| Year of birth (age group)                                                                | (Ref: 1998-2005; current age: 18-24)     |                      |                    |
|                                                                                          | 1943 or earlier (current age: 80+ years) | 1.39                 | 1.00               |
|                                                                                          | 1943-1953 (current age: 70-79 years)     | 1.78                 | 1.00               |

| Variable                       | Category                                  | E-value for Estimate | E-value for 95% CI |
|--------------------------------|-------------------------------------------|----------------------|--------------------|
|                                | 1953-1963 (current age: 60-69 years)      | 1.06                 | 1.00               |
|                                | 1963-1973 (current age: 50-59 years)      | 1.15                 | 1.00               |
|                                | 1973-1983 (current age: 40-49 years)      | 1.35                 | 1.00               |
|                                | 1983-1993 (current age: 30-39 years)      | 1.17                 | 1.00               |
|                                | 1993-1998 (current age: 25-29 years)      | 1.27                 | 1.00               |
| Religion when twelve years old | (Ref:)                                    |                      |                    |
|                                | Collapsed affiliations with prevalence<3% | 1.80                 | 1.42               |

**Table S22a. United Kingdom: Demographic descriptive statistics**  
**Characteristic**

**N = 3,354<sup>1</sup>**

**Age group**

|                                          |            |
|------------------------------------------|------------|
| 1943 or earlier (current age: 80+ years) | 91 (2.7%)  |
| 1943-1953 (current age: 70-79 years)     | 451 (13%)  |
| 1953-1963 (current age: 60-69 years)     | 564 (17%)  |
| 1963-1973 (current age: 50-59 years)     | 683 (20%)  |
| 1973-1983 (current age: 40-49 years)     | 577 (17%)  |
| 1983-1993 (current age: 30-39 years)     | 541 (16%)  |
| 1993-1998 (current age: 25-29 years)     | 237 (7.1%) |
| 1998-2005 (current age: 18-24 years)     | 209 (6.2%) |
| (Missing)                                | 1 (<0.1%)  |

**Gender**

|           |             |
|-----------|-------------|
| 1. Male   | 1,587 (47%) |
| 2. Female | 1,754 (52%) |
| 3. Other  | 9 (0.3%)    |
| (Missing) | 4 (0.1%)    |

**Marital status**

|                              |             |
|------------------------------|-------------|
| 1. Single/Never been married | 888 (26%)   |
| 2. Married                   | 1,563 (47%) |
| 3. Separated                 | 60 (1.8%)   |
| 4. Divorced                  | 282 (8.4%)  |
| 5. Widowed                   | 174 (5.2%)  |
| 6. Domestic partner          | 363 (11%)   |
| (Missing)                    | 24 (0.7%)   |

**Employment**

|                                     |             |
|-------------------------------------|-------------|
| 1. Employed for an employer         | 1,833 (55%) |
| 2. Self-employed                    | 268 (8.0%)  |
| 3. Retired                          | 791 (24%)   |
| 4. Student                          | 99 (2.9%)   |
| 5. Homemaker                        | 126 (3.7%)  |
| 6. Unemployed and looking for a job | 113 (3.4%)  |
| 7. None of these/Other              | 117 (3.5%)  |
| (Missing)                           | 7 (0.2%)    |

**Religious service attendance**

|                               |             |
|-------------------------------|-------------|
| 1. More than once a week      | 130 (3.9%)  |
| 2. Once a week                | 277 (8.3%)  |
| 3. One to three times a month | 187 (5.6%)  |
| 4. A few times a year         | 699 (21%)   |
| 5. Never                      | 2,052 (61%) |
| (Missing)                     | 9 (0.3%)    |

**Education**

|            |             |
|------------|-------------|
| 1. Up to 8 | 739 (22%)   |
| 2. 9-15    | 1,403 (42%) |
| 3. 16+     | 1,210 (36%) |
| (Missing)  | 2 (<0.1%)   |

**Immigration**

|                            |             |
|----------------------------|-------------|
| 1. Born in this country    | 2,931 (87%) |
| 2. Born in another country | 418 (12%)   |

| <b>Characteristic</b>                                       | <b>N = 3,354<sup>1</sup></b> |
|-------------------------------------------------------------|------------------------------|
| (Missing)                                                   | 5 (0.2%)                     |
| <b>Religious affiliation</b>                                |                              |
| 1. Christianity                                             | 1,657 (49%)                  |
| 10. Taoism                                                  | 4 (0.1%)                     |
| 11. Confucianism                                            | 3 (<0.1%)                    |
| 12. Primal, Animist, or Folk religion                       | 16 (0.5%)                    |
| 13. Spiritism                                               | 0 (0%)                       |
| 14. Umbanda, Candomblé, and other African-derived religions | 0 (0%)                       |
| 15. Chinese folk/traditional religion                       | 0 (0%)                       |
| 2. Islam                                                    | 129 (3.8%)                   |
| 3. Hinduism                                                 | 31 (0.9%)                    |
| 4. Buddhism                                                 | 16 (0.5%)                    |
| 5. Judaism                                                  | 27 (0.8%)                    |
| 6. Sikhism                                                  | 9 (0.3%)                     |
| 7. Baha'i                                                   | 1 (<0.1%)                    |
| 8. Jainism                                                  | 0 (0%)                       |
| 9. Shinto                                                   | 0 (0%)                       |
| 96. Some other religion                                     | 53 (1.6%)                    |
| 97. No religion/Atheist/Agnostic                            | 1,393 (42%)                  |
| (Missing)                                                   | 16 (0.5%)                    |
| <b>RACE ETHNICITY</b>                                       |                              |
| (Missing)                                                   | 9 (0.3%)                     |
| 2001. United Kingdom: Asian                                 | 214 (6.4%)                   |
| 2002. United Kingdom: Black                                 | 72 (2.2%)                    |
| 2003. United Kingdom: White                                 | 2,979 (89%)                  |
| 9995. Prefer not to answer                                  | 22 (0.6%)                    |
| 9996. Other                                                 | 58 (1.7%)                    |

<sup>1</sup>n (%)

**Table S22b. United Kingdom: Childhood descriptive statistics**

| <b>Characteristic</b>                      | <b>N = 3,354<sup>1</sup></b> |
|--------------------------------------------|------------------------------|
| <b>Age</b>                                 | 50 (17)                      |
| <b>Year of birth</b>                       |                              |
| 1943 or earlier (current age: 80+ years)   | 91 (2.7%)                    |
| 1943-1953 (current age: 70-79 years)       | 451 (13%)                    |
| 1953-1963 (current age: 60-69 years)       | 564 (17%)                    |
| 1963-1973 (current age: 50-59 years)       | 683 (20%)                    |
| 1973-1983 (current age: 40-49 years)       | 577 (17%)                    |
| 1983-1993 (current age: 30-39 years)       | 541 (16%)                    |
| 1993-1998 (current age: 25-29 years)       | 237 (7.1%)                   |
| 1998-2005 (current age: 18-24 years)       | 209 (6.2%)                   |
| (Missing)                                  | 1 (<0.1%)                    |
| <b>Gender</b>                              |                              |
| 1. Male                                    | 1,587 (47%)                  |
| 2. Female                                  | 1,754 (52%)                  |
| 3. Other                                   | 9 (0.3%)                     |
| (Missing)                                  | 4 (0.1%)                     |
| <b>Parent marital status</b>               |                              |
| 1. Parents were married                    | 2,731 (81%)                  |
| 2. Parents were divorced                   | 323 (9.6%)                   |
| 3. Parents were never married              | 163 (4.8%)                   |
| 4. One or both of them had died            | 106 (3.2%)                   |
| 5. Unsure                                  | 29 (0.9%)                    |
| (Missing)                                  | 3 (<0.1%)                    |
| <b>Age 12 religious service attendance</b> |                              |
| 1. At least once a week                    | 964 (29%)                    |
| 2. One to three times a month              | 468 (14%)                    |
| 3. Less than once a month                  | 595 (18%)                    |
| 4. Never                                   | 1,310 (39%)                  |
| (Missing)                                  | 17 (0.5%)                    |
| <b>Relationship with mother</b>            |                              |
| 1. Very good                               | 1,993 (59%)                  |
| 2. Somewhat good                           | 955 (28%)                    |
| 3. Somewhat bad                            | 230 (6.8%)                   |
| 4. Very bad                                | 91 (2.7%)                    |
| 97. (Does not apply)                       | 73 (2.2%)                    |
| (Missing)                                  | 13 (0.4%)                    |
| <b>Relationship with father</b>            |                              |
| 1. Very good                               | 1,735 (52%)                  |
| 2. Somewhat good                           | 906 (27%)                    |
| 3. Somewhat bad                            | 286 (8.5%)                   |
| 4. Very bad                                | 196 (5.8%)                   |
| 97. (Does not apply)                       | 219 (6.5%)                   |
| (Missing)                                  | 13 (0.4%)                    |
| <b>Outsider growing up</b>                 |                              |
| 1. Yes                                     | 635 (19%)                    |
| 2. No                                      | 2,690 (80%)                  |
| (Missing)                                  | 29 (0.9%)                    |

| Characteristic                                              | N = 3,354 <sup>1</sup> |
|-------------------------------------------------------------|------------------------|
| <b>Abuse</b>                                                |                        |
| 1. Yes                                                      | 513 (15%)              |
| 2. No                                                       | 2,830 (84%)            |
| (Missing)                                                   | 11 (0.3%)              |
| <b>Self-rated health growing up</b>                         |                        |
| 1. Excellent                                                | 1,372 (41%)            |
| 2. Very good                                                | 1,057 (32%)            |
| 3. Good                                                     | 607 (18%)              |
| 4. Fair                                                     | 228 (6.8%)             |
| 5. Poor                                                     | 77 (2.3%)              |
| (Missing)                                                   | 13 (0.4%)              |
| <b>Immigration status</b>                                   |                        |
| 1. Born in this country                                     | 2,931 (87%)            |
| 2. Born in another country                                  | 418 (12%)              |
| (Missing)                                                   | 5 (0.2%)               |
| <b>Subjective financial status of family growing up</b>     |                        |
| 1. Lived comfortably                                        | 1,461 (44%)            |
| 2. Got by                                                   | 1,288 (38%)            |
| 3. Found it difficult                                       | 417 (12%)              |
| 4. Found it very difficult                                  | 171 (5.1%)             |
| (Missing)                                                   | 17 (0.5%)              |
| <b>Religious affiliation</b>                                |                        |
| 1. Christianity                                             | 2,175 (65%)            |
| 10. Taoism                                                  | 0 (<0.1%)              |
| 11. Confucianism                                            | 3 (<0.1%)              |
| 12. Primal, Animist, or Folk religion                       | 10 (0.3%)              |
| 13. Spiritism                                               | 0 (0%)                 |
| 14. Umbanda, Candomblé, and other African-derived religions | 0 (0%)                 |
| 15. Chinese folk/traditional religion                       | 0 (0%)                 |
| 2. Islam                                                    | 131 (3.9%)             |
| 3. Hinduism                                                 | 44 (1.3%)              |
| 4. Buddhism                                                 | 6 (0.2%)               |
| 5. Judaism                                                  | 31 (0.9%)              |
| 6. Sikhism                                                  | 9 (0.3%)               |
| 7. Baha'i                                                   | 1 (<0.1%)              |
| 8. Jainism                                                  | 0 (<0.1%)              |
| 9. Shinto                                                   | 0 (0%)                 |
| 96. Some other religion                                     | 25 (0.7%)              |
| 97. No religion/Atheist/Agnostic                            | 900 (27%)              |
| (Missing)                                                   | 18 (0.5%)              |
| <b>Race/Ethnicity</b>                                       |                        |
| (Missing)                                                   | 9 (0.3%)               |
| 2001. United Kingdom: Asian                                 | 214 (6.4%)             |
| 2002. United Kingdom: Black                                 | 72 (2.2%)              |
| 2003. United Kingdom: White                                 | 2,979 (89%)            |
| 9995. Prefer not to answer                                  | 22 (0.6%)              |
| 9996. Other                                                 | 58 (1.7%)              |

Characteristic

N = 3,354<sup>1</sup>

<sup>1</sup>Mean (SD); n (%)

**Table S22c. United Kingdom: Proportions by demographic category**

| Variable                     | Category                                 | Proportion | 95% CI         | SE    | p-value  |
|------------------------------|------------------------------------------|------------|----------------|-------|----------|
| Age group                    | 1998-2005 (current age: 18-24 years)     | 0.718      | (0.603, 0.832) | 0.058 | 1.45e-01 |
|                              | 1943 or earlier (current age: 80+ years) | 0.825      | (0.713, 0.938) | 0.056 |          |
|                              | 1943-1953 (current age: 70-79 years)     | 0.658      | (0.592, 0.725) | 0.034 |          |
|                              | 1953-1963 (current age: 60-69 years)     | 0.725      | (0.676, 0.774) | 0.025 |          |
|                              | 1963-1973 (current age: 50-59 years)     | 0.743      | (0.699, 0.788) | 0.022 |          |
|                              | 1973-1983 (current age: 40-49 years)     | 0.706      | (0.654, 0.758) | 0.026 |          |
|                              | 1983-1993 (current age: 30-39 years)     | 0.738      | (0.681, 0.794) | 0.029 |          |
|                              | 1993-1998 (current age: 25-29 years)     | 0.793      | (0.709, 0.876) | 0.042 |          |
|                              | Male                                     | 0.713      | (0.681, 0.746) | 0.017 |          |
|                              | Female                                   | 0.738      | (0.707, 0.768) | 0.015 |          |
| Gender                       | Other                                    | 0.565      | (0.000, 1.000) | 0.310 | 4.83e-01 |
| Marital status               | Single/Never been married                | 0.707      | (0.660, 0.753) | 0.024 |          |
|                              | Divorced                                 | 0.691      | (0.611, 0.772) | 0.041 |          |
|                              | Domestic partner                         | 0.748      | (0.682, 0.814) | 0.033 |          |
|                              | Married                                  | 0.733      | (0.701, 0.764) | 0.016 |          |
|                              | Separated                                | 0.834      | (0.732, 0.937) | 0.051 |          |
|                              | Widowed                                  | 0.733      | (0.638, 0.827) | 0.048 |          |
| Employment                   | Employed for an employer                 | 0.735      | (0.706, 0.765) | 0.015 | 3.03e-03 |
|                              | Homemaker                                | 0.661      | (0.540, 0.781) | 0.061 |          |
|                              | None of these/Other                      | 0.628      | (0.518, 0.739) | 0.056 |          |
|                              | Retired                                  | 0.707      | (0.661, 0.754) | 0.024 |          |
|                              | Self-employed                            | 0.838      | (0.776, 0.901) | 0.032 |          |
|                              | Student                                  | 0.698      | (0.530, 0.865) | 0.084 |          |
|                              | Unemployed and looking for a job         | 0.624      | (0.483, 0.765) | 0.071 |          |
|                              |                                          |            |                |       |          |
| Religious service attendance | Never                                    | 0.674      | (0.645, 0.703) | 0.015 | 1.61e-09 |
|                              | A few times a year                       | 0.799      | (0.755, 0.842) | 0.022 |          |
|                              | More than once a week                    | 0.910      | (0.829, 0.990) | 0.041 |          |
|                              | Once a week                              | 0.792      | (0.715, 0.868) | 0.039 |          |
|                              | One to three times a month               | 0.794      | (0.701, 0.887) | 0.047 |          |
| Education                    | 9-15                                     | 0.713      | (0.682, 0.744) | 0.016 | 3.77e-12 |
|                              | 16+                                      | 0.821      | (0.793, 0.850) | 0.014 |          |

| Variable                 | Category                                                          | Proportion | 95% CI         | SE    | p-value  |
|--------------------------|-------------------------------------------------------------------|------------|----------------|-------|----------|
| Immigration status       | Up to 8<br>Born in this<br>country                                | 0.592      | (0.528, 0.656) | 0.033 | 5.26e-03 |
|                          | Born in another<br>country                                        | 0.715      | (0.691, 0.738) | 0.012 |          |
|                          | No<br>religion/Atheist/Ag<br>nostic                               | 0.803      | (0.745, 0.861) | 0.029 |          |
| Religious<br>affiliation | Christianity                                                      | 0.717      | (0.682, 0.751) | 0.017 | 7.88e-01 |
|                          | Combined                                                          | 0.733      | (0.702, 0.764) | 0.016 |          |
|                          | Spiritism                                                         | 0.728      | (0.648, 0.808) | 0.041 |          |
|                          | Umbanda,<br>Candomblé, and<br>other African-<br>derived religions | *          | *              | *     |          |
|                          | Buddhism                                                          | *          | *              | *     |          |
|                          | Islam                                                             | *          | *              | *     |          |
|                          | Chinese<br>folk/traditional<br>religion                           | *          | *              | *     |          |
|                          | Hinduism                                                          | *          | *              | *     |          |
|                          | Judaism                                                           | *          | *              | *     |          |
|                          | Primal, Animist, or<br>Folk religion                              | *          | *              | *     |          |

**Table S22d. United Kingdom: Childhood predictors regression analysis**

| Variable                                                        | Category                                                                                                                | Risk-Ratio                       | logRR SE                         | RR 95% CI                                                | Global p-value |
|-----------------------------------------------------------------|-------------------------------------------------------------------------------------------------------------------------|----------------------------------|----------------------------------|----------------------------------------------------------|----------------|
| Relationship with your mother growing up                        | (Ref: Very bad/somewhat bad)<br>Very good/somewhat good                                                                 | 1.015                            | 0.038                            | (0.94,1.09)                                              | 0.549          |
| Relationship with your father growing up                        | (Ref: Very bad/somewhat bad)<br>Very good/somewhat good                                                                 | 1.009                            | 0.033                            | (0.95,1.08)                                              | 0.572          |
| Parents married to each other when you were around 12 years old | (Ref: Parents married)<br>One or both of them had died<br>Parents were divorced<br>Parents were never married<br>Unsure | 1.066<br>1.015<br>0.992<br>0.952 | 0.070<br>0.037<br>0.063<br>0.157 | (0.93,1.22)<br>(0.94,1.09)<br>(0.88,1.12)<br>(0.70,1.30) | 0.737          |
| Feelings about familys household income when growing up         | (Ref: Got by)<br>Found it difficult<br>Found it very difficult<br>Lived comfortably                                     | 1.026<br>0.994<br>1.063          | 0.035<br>0.056<br>0.024          | (0.96,1.10)<br>(0.89,1.11)<br>(1.01,1.12)                | 0.041          |
| Physically or sexually abused when growing up                   | (Ref: No)                                                                                                               | 1.043                            | 0.032                            | (0.98,1.11)                                              | 0.225          |
| Felt like an outsider in your family when growing up            | (Ref: No)<br>Yes                                                                                                        | 0.952                            | 0.032                            | (0.89,1.01)                                              | 0.158          |
| Your health when growing up                                     | (Ref: Good)<br>Excellent<br>Fair<br>Poor<br>Very good                                                                   | 1.014<br>0.946<br>1.045<br>0.980 | 0.032<br>0.052<br>0.078<br>0.033 | (0.95,1.08)<br>(0.86,1.05)<br>(0.90,1.22)<br>(0.92,1.05) | 0.655          |
| Born in This                                                    | (Ref: Born in this                                                                                                      |                                  |                                  |                                                          | 0.046          |

| Variable                                                                                  | Category                                  | Risk-Ratio | logRR SE | RR 95% CI   | Global p-value |
|-------------------------------------------------------------------------------------------|-------------------------------------------|------------|----------|-------------|----------------|
| country                                                                                   | country)                                  |            |          |             |                |
|                                                                                           | Born in another country                   | 1.067      | 0.031    | (1.00,1.13) |                |
| How Often You Attended Religious Services or Worshipped When You Were Around 12 Years Old | (Ref: Never)                              |            |          |             | 1.58e-06       |
|                                                                                           | At least once a week                      | 1.159      | 0.030    | (1.09,1.23) |                |
|                                                                                           | Less than once a month                    | 1.162      | 0.031    | (1.09,1.23) |                |
|                                                                                           | One to three times a month                | 1.142      | 0.039    | (1.06,1.23) |                |
| Year of birth (age group)                                                                 | (Ref: 1998-2005; current age: 18-24)      |            |          |             | 0.809          |
|                                                                                           | 1943 or earlier (current age: 80+ years)  | 1.069      | 0.080    | (0.91,1.25) |                |
|                                                                                           | 1943-1953 (current age: 70-79 years)      | 0.938      | 0.066    | (0.82,1.07) |                |
|                                                                                           | 1953-1963 (current age: 60-69 years)      | 1.008      | 0.062    | (0.89,1.14) |                |
|                                                                                           | 1963-1973 (current age: 50-59 years)      | 1.025      | 0.061    | (0.91,1.16) |                |
|                                                                                           | 1973-1983 (current age: 40-49 years)      | 0.982      | 0.063    | (0.87,1.11) |                |
|                                                                                           | 1983-1993 (current age: 30-39 years)      | 1.002      | 0.064    | (0.89,1.14) |                |
|                                                                                           | 1993-1998 (current age: 25-29 years)      | 1.061      | 0.071    | (0.92,1.22) |                |
| Religion when twelve years old                                                            | (Ref: No religion/Atheist/Agnostic)       |            |          |             | 0.044          |
|                                                                                           | Christianity                              | 0.939      | 0.028    | (0.89,0.99) |                |
|                                                                                           | Collapsed affiliations with prevalence<3% | 0.884      | 0.066    | (0.78,1.01) |                |
|                                                                                           | Islam                                     | 0.850      | 0.080    | (0.73,0.99) |                |
| Race plurality (prominent race/ethnic group [0] or not [1])                               | (Ref: Plurality group)                    |            |          |             | 0.537          |
|                                                                                           | Non-plurality groups                      | 0.981      | 0.045    | (0.90,1.07) |                |

**Table S22e. United Kingdom: Sensitivity to unmeasured confounding of childhood predictors**

| Variable                                                                                 | Category                                 | E-value for Estimate | E-value for 95% CI |
|------------------------------------------------------------------------------------------|------------------------------------------|----------------------|--------------------|
| Relationship with your mother growing up                                                 | (Ref: Very bad/somewhat bad)             |                      |                    |
|                                                                                          | Very good/somewhat good                  | 1.14                 | 1.00               |
| Relationship with your father growing up                                                 | (Ref: Very bad/somewhat bad)             |                      |                    |
|                                                                                          | Very good/somewhat good                  | 1.10                 | 1.00               |
| Parents married to each other when you were around 12 years old                          | (Ref: Parents married)                   |                      |                    |
|                                                                                          | One or both of them had died             | 1.33                 | 1.00               |
|                                                                                          | Parents were divorced                    | 1.14                 | 1.00               |
|                                                                                          | Parents were never married               | 1.10                 | 1.00               |
|                                                                                          | Unsure                                   | 1.28                 | 1.00               |
| Feelings about familys household income when growing up                                  | (Ref: Got by)                            |                      |                    |
|                                                                                          | Found it difficult                       | 1.19                 | 1.00               |
|                                                                                          | Found it very difficult                  | 1.08                 | 1.00               |
|                                                                                          | Lived comfortably                        | 1.32                 | 1.13               |
| Physically or sexually abused when growing up                                            | (Ref: No)                                |                      |                    |
|                                                                                          |                                          | 1.26                 | 1.00               |
| Felt like an outsider in your family when growing up                                     | (Ref: No)                                |                      |                    |
|                                                                                          | Yes                                      | 1.28                 | 1.00               |
| Your health when growing up                                                              | (Ref: Good)                              |                      |                    |
|                                                                                          | Excellent                                | 1.13                 | 1.00               |
|                                                                                          | Fair                                     | 1.30                 | 1.00               |
|                                                                                          | Poor                                     | 1.26                 | 1.00               |
|                                                                                          | Very good                                | 1.16                 | 1.00               |
| Born in This country                                                                     | (Ref: Born in this country)              |                      |                    |
|                                                                                          | Born in another country                  | 1.33                 | 1.06               |
| How Often You Attended Religious Services or Worshiped When You Were Around 12 Years Old | (Ref: Never)                             |                      |                    |
|                                                                                          | At least once a week                     | 1.59                 | 1.41               |
|                                                                                          | Less than once a month                   | 1.59                 | 1.41               |
|                                                                                          | One to three times a month               | 1.54                 | 1.31               |
| Year of birth (age group)                                                                | (Ref: 1998-2005; current age: 18-24)     |                      |                    |
|                                                                                          | 1943 or earlier (current age: 80+ years) | 1.34                 | 1.00               |
|                                                                                          | 1943-1953 (current age: 70-79 years)     | 1.33                 | 1.00               |

| Variable                                                    | Category                                  | E-value for Estimate | E-value for 95% CI |
|-------------------------------------------------------------|-------------------------------------------|----------------------|--------------------|
|                                                             | 1953-1963 (current age: 60-69 years)      | 1.10                 | 1.00               |
|                                                             | 1963-1973 (current age: 50-59 years)      | 1.19                 | 1.00               |
|                                                             | 1973-1983 (current age: 40-49 years)      | 1.15                 | 1.00               |
|                                                             | 1983-1993 (current age: 30-39 years)      | 1.05                 | 1.00               |
|                                                             | 1993-1998 (current age: 25-29 years)      | 1.32                 | 1.00               |
| Religion when twelve years old                              | (Ref: No religion/Atheist/Agnostic)       |                      |                    |
|                                                             | Christianity                              | 1.33                 | 1.10               |
|                                                             | Collapsed affiliations with prevalence<3% | 1.52                 | 1.00               |
|                                                             | Islam                                     | 1.63                 | 1.09               |
| Race plurality (prominent race/ethnic group [0] or not [1]) | (Ref: Plurality group)                    |                      |                    |
|                                                             | Non-plurality groups                      | 1.16                 | 1.00               |

**Table S23a. United States: Demographic descriptive statistics**

| <b>Characteristic</b>                    | <b>N = 32,192<sup>1</sup></b> |
|------------------------------------------|-------------------------------|
| <b>Age group</b>                         |                               |
| 1943 or earlier (current age: 80+ years) | 1,249 (3.9%)                  |
| 1943-1953 (current age: 70-79 years)     | 3,919 (12%)                   |
| 1953-1963 (current age: 60-69 years)     | 6,715 (21%)                   |
| 1963-1973 (current age: 50-59 years)     | 6,363 (20%)                   |
| 1973-1983 (current age: 40-49 years)     | 4,966 (15%)                   |
| 1983-1993 (current age: 30-39 years)     | 5,751 (18%)                   |
| 1993-1998 (current age: 25-29 years)     | 2,111 (6.6%)                  |
| 1998-2005 (current age: 18-24 years)     | 1,119 (3.5%)                  |
| (Missing)                                | 0 (0%)                        |
| <b>Gender</b>                            |                               |
| 1. Male                                  | 15,188 (47%)                  |
| 2. Female                                | 16,699 (52%)                  |
| 3. Other                                 | 239 (0.7%)                    |
| (Missing)                                | 66 (0.2%)                     |
| <b>Marital status</b>                    |                               |
| 1. Single/Never been married             | 6,520 (20%)                   |
| 2. Married                               | 18,448 (57%)                  |
| 3. Separated                             | 494 (1.5%)                    |
| 4. Divorced                              | 3,346 (10%)                   |
| 5. Widowed                               | 1,734 (5.4%)                  |
| 6. Domestic partner                      | 1,498 (4.7%)                  |
| (Missing)                                | 153 (0.5%)                    |
| <b>Employment</b>                        |                               |
| 1. Employed for an employer              | 16,504 (51%)                  |
| 2. Self-employed                         | 2,754 (8.6%)                  |
| 3. Retired                               | 8,510 (26%)                   |
| 4. Student                               | 625 (1.9%)                    |
| 5. Homemaker                             | 1,768 (5.5%)                  |
| 6. Unemployed and looking for a job      | 1,014 (3.1%)                  |
| 7. None of these/Other                   | 938 (2.9%)                    |
| (Missing)                                | 80 (0.2%)                     |
| <b>Religious service attendance</b>      |                               |
| 1. More than once a week                 | 2,319 (7.2%)                  |
| 2. Once a week                           | 5,349 (17%)                   |
| 3. One to three times a month            | 2,368 (7.4%)                  |
| 4. A few times a year                    | 7,459 (23%)                   |
| 5. Never                                 | 14,604 (45%)                  |
| (Missing)                                | 93 (0.3%)                     |
| <b>Education</b>                         |                               |
| 1. Up to 8                               | 71 (0.2%)                     |
| 2. 9-15                                  | 18,898 (59%)                  |
| 3. 16+                                   | 13,148 (41%)                  |
| (Missing)                                | 75 (0.2%)                     |
| <b>Immigration</b>                       |                               |
| 1. Born in this country                  | 29,508 (92%)                  |
| 2. Born in another country               | 2,396 (7.4%)                  |

| <b>Characteristic</b>                                       | <b>N = 32,192<sup>1</sup></b> |
|-------------------------------------------------------------|-------------------------------|
| (Missing)                                                   | 288 (0.9%)                    |
| <b>Religious affiliation</b>                                |                               |
| 1. Christianity                                             | 20,039 (62%)                  |
| 10. Taoism                                                  | 40 (0.1%)                     |
| 11. Confucianism                                            | 9 (<0.1%)                     |
| 12. Primal, Animist, or Folk religion                       | 130 (0.4%)                    |
| 13. Spiritism                                               | 0 (0%)                        |
| 14. Umbanda, Candomblé, and other African-derived religions | 0 (0%)                        |
| 15. Chinese folk/traditional religion                       | 0 (0%)                        |
| 2. Islam                                                    | 126 (0.4%)                    |
| 3. Hinduism                                                 | 110 (0.3%)                    |
| 4. Buddhism                                                 | 271 (0.8%)                    |
| 5. Judaism                                                  | 619 (1.9%)                    |
| 6. Sikhism                                                  | 13 (<0.1%)                    |
| 7. Baha'i                                                   | 15 (<0.1%)                    |
| 8. Jainism                                                  | 10 (<0.1%)                    |
| 9. Shinto                                                   | 11 (<0.1%)                    |
| 96. Some other religion                                     | 965 (3.0%)                    |
| 97. No religion/Atheist/Agnostic                            | 9,545 (30%)                   |
| (Missing)                                                   | 290 (0.9%)                    |
| <b>RACE ETHNICITY</b>                                       |                               |
| (Missing)                                                   | 19 (<0.1%)                    |
| 2201. United States: White                                  | 20,356 (63%)                  |
| 2202. United States: Other                                  | 884 (2.7%)                    |
| 2203. United States: Black                                  | 3,801 (12%)                   |
| 2204. United States: Asian                                  | 1,572 (4.9%)                  |
| 2205. United States: Hispanic                               | 5,560 (17%)                   |

<sup>1</sup>n (%)

**Table S23b. United States: Childhood descriptive statistics**

| <b>Characteristic</b>                      | <b>N = 32,192<sup>1</sup></b> |
|--------------------------------------------|-------------------------------|
| <b>Age</b>                                 | 52 (16)                       |
| <b>Year of birth</b>                       |                               |
| 1943 or earlier (current age: 80+ years)   | 1,249 (3.9%)                  |
| 1943-1953 (current age: 70-79 years)       | 3,919 (12%)                   |
| 1953-1963 (current age: 60-69 years)       | 6,715 (21%)                   |
| 1963-1973 (current age: 50-59 years)       | 6,363 (20%)                   |
| 1973-1983 (current age: 40-49 years)       | 4,966 (15%)                   |
| 1983-1993 (current age: 30-39 years)       | 5,751 (18%)                   |
| 1993-1998 (current age: 25-29 years)       | 2,111 (6.6%)                  |
| 1998-2005 (current age: 18-24 years)       | 1,119 (3.5%)                  |
| (Missing)                                  | 0 (0%)                        |
| <b>Gender</b>                              |                               |
| 1. Male                                    | 15,188 (47%)                  |
| 2. Female                                  | 16,699 (52%)                  |
| 3. Other                                   | 239 (0.7%)                    |
| (Missing)                                  | 66 (0.2%)                     |
| <b>Parent marital status</b>               |                               |
| 1. Parents were married                    | 24,073 (75%)                  |
| 2. Parents were divorced                   | 5,074 (16%)                   |
| 3. Parents were never married              | 1,863 (5.8%)                  |
| 4. One or both of them had died            | 903 (2.8%)                    |
| 5. Unsure                                  | 241 (0.7%)                    |
| (Missing)                                  | 38 (0.1%)                     |
| <b>Age 12 religious service attendance</b> |                               |
| 1. At least once a week                    | 16,357 (51%)                  |
| 2. One to three times a month              | 5,660 (18%)                   |
| 3. Less than once a month                  | 4,751 (15%)                   |
| 4. Never                                   | 5,313 (17%)                   |
| (Missing)                                  | 111 (0.3%)                    |
| <b>Relationship with mother</b>            |                               |
| 1. Very good                               | 17,778 (55%)                  |
| 2. Somewhat good                           | 9,679 (30%)                   |
| 3. Somewhat bad                            | 2,917 (9.1%)                  |
| 4. Very bad                                | 1,230 (3.8%)                  |
| 97. (Does not apply)                       | 489 (1.5%)                    |
| (Missing)                                  | 99 (0.3%)                     |
| <b>Relationship with father</b>            |                               |
| 1. Very good                               | 13,316 (41%)                  |
| 2. Somewhat good                           | 10,692 (33%)                  |
| 3. Somewhat bad                            | 3,990 (12%)                   |
| 4. Very bad                                | 1,967 (6.1%)                  |
| 97. (Does not apply)                       | 2,191 (6.8%)                  |
| (Missing)                                  | 37 (0.1%)                     |
| <b>Outsider growing up</b>                 |                               |
| 1. Yes                                     | 7,690 (24%)                   |
| 2. No                                      | 24,226 (75%)                  |
| (Missing)                                  | 276 (0.9%)                    |

| Characteristic                                              | N = 32,192 <sup>1</sup> |
|-------------------------------------------------------------|-------------------------|
| <b>Abuse</b>                                                |                         |
| 1. Yes                                                      | 7,960 (25%)             |
| 2. No                                                       | 24,024 (75%)            |
| (Missing)                                                   | 208 (0.6%)              |
| <b>Self-rated health growing up</b>                         |                         |
| 1. Excellent                                                | 15,174 (47%)            |
| 2. Very good                                                | 10,208 (32%)            |
| 3. Good                                                     | 4,877 (15%)             |
| 4. Fair                                                     | 1,507 (4.7%)            |
| 5. Poor                                                     | 352 (1.1%)              |
| (Missing)                                                   | 74 (0.2%)               |
| <b>Immigration status</b>                                   |                         |
| 1. Born in this country                                     | 29,508 (92%)            |
| 2. Born in another country                                  | 2,396 (7.4%)            |
| (Missing)                                                   | 288 (0.9%)              |
| <b>Subjective financial status of family growing up</b>     |                         |
| 1. Lived comfortably                                        | 13,009 (40%)            |
| 2. Got by                                                   | 13,243 (41%)            |
| 3. Found it difficult                                       | 4,114 (13%)             |
| 4. Found it very difficult                                  | 1,809 (5.6%)            |
| (Missing)                                                   | 18 (<0.1%)              |
| <b>Religious affiliation</b>                                |                         |
| 1. Christianity                                             | 26,359 (82%)            |
| 10. Taoism                                                  | 14 (<0.1%)              |
| 11. Confucianism                                            | 8 (<0.1%)               |
| 12. Primal, Animist, or Folk religion                       | 37 (0.1%)               |
| 13. Spiritism                                               | 0 (0%)                  |
| 14. Umbanda, Candomblé, and other African-derived religions | 0 (0%)                  |
| 15. Chinese folk/traditional religion                       | 0 (0%)                  |
| 2. Islam                                                    | 152 (0.5%)              |
| 3. Hinduism                                                 | 126 (0.4%)              |
| 4. Buddhism                                                 | 124 (0.4%)              |
| 5. Judaism                                                  | 738 (2.3%)              |
| 6. Sikhism                                                  | 19 (<0.1%)              |
| 7. Baha'i                                                   | 5 (<0.1%)               |
| 8. Jainism                                                  | 10 (<0.1%)              |
| 9. Shinto                                                   | 5 (<0.1%)               |
| 96. Some other religion                                     | 259 (0.8%)              |
| 97. No religion/Atheist/Agnostic                            | 4,258 (13%)             |
| (Missing)                                                   | 78 (0.2%)               |
| <b>Race/Ethnicity</b>                                       |                         |
| (Missing)                                                   | 19 (<0.1%)              |
| 2201. United States: White                                  | 20,356 (63%)            |
| 2202. United States: Other                                  | 884 (2.7%)              |
| 2203. United States: Black                                  | 3,801 (12%)             |
| 2204. United States: Asian                                  | 1,572 (4.9%)            |
| 2205. United States: Hispanic                               | 5,560 (17%)             |

| Characteristic                | N = 32,192 <sup>1</sup> |
|-------------------------------|-------------------------|
| <sup>1</sup> Mean (SD); n (%) |                         |

**Table S23c. United States: Proportions by demographic category**

| Variable                     | Category                                 | Proportion | 95% CI         | SE    | p-value  |
|------------------------------|------------------------------------------|------------|----------------|-------|----------|
| Age group                    | 1998-2005 (current age: 18-24 years)     | 0.795      | (0.729, 0.861) | 0.034 | 2.33e-05 |
|                              | 1943 or earlier (current age: 80+ years) | 0.878      | (0.855, 0.901) | 0.012 |          |
|                              | 1943-1953 (current age: 70-79 years)     | 0.882      | (0.870, 0.894) | 0.006 |          |
|                              | 1953-1963 (current age: 60-69 years)     | 0.884      | (0.874, 0.895) | 0.005 |          |
|                              | 1963-1973 (current age: 50-59 years)     | 0.863      | (0.850, 0.877) | 0.007 |          |
|                              | 1973-1983 (current age: 40-49 years)     | 0.851      | (0.833, 0.868) | 0.009 |          |
|                              | 1983-1993 (current age: 30-39 years)     | 0.852      | (0.834, 0.870) | 0.009 |          |
|                              | 1993-1998 (current age: 25-29 years)     | 0.819      | (0.781, 0.858) | 0.020 |          |
|                              | Male                                     | 0.840      | (0.830, 0.850) | 0.005 |          |
|                              | Female                                   | 0.879      | (0.870, 0.888) | 0.005 |          |
| Gender                       | Other                                    | 0.951      | (0.910, 0.992) | 0.021 | 1.16e-11 |
| Marital status               | Single/Never been married                | 0.824      | (0.804, 0.844) | 0.010 | 1.35e-04 |
|                              | Divorced                                 | 0.859      | (0.839, 0.878) | 0.010 |          |
|                              | Domestic partner                         | 0.865      | (0.831, 0.898) | 0.017 |          |
|                              | Married                                  | 0.875      | (0.868, 0.883) | 0.004 |          |
|                              | Separated                                | 0.880      | (0.833, 0.926) | 0.024 |          |
|                              | Widowed                                  | 0.853      | (0.828, 0.878) | 0.013 |          |
|                              | Employed for an employer                 | 0.847      | (0.837, 0.857) | 0.005 | 1.86e-11 |
| Employment                   | Homemaker                                | 0.905      | (0.878, 0.932) | 0.014 |          |
|                              | None of these/Other                      | 0.816      | (0.768, 0.863) | 0.024 |          |
|                              | Retired                                  | 0.881      | (0.872, 0.890) | 0.005 |          |
|                              | Self-employed                            | 0.906      | (0.887, 0.926) | 0.010 |          |
|                              | Student                                  | 0.858      | (0.785, 0.930) | 0.037 |          |
|                              | Unemployed and looking for a job         | 0.776      | (0.711, 0.841) | 0.033 |          |
| Religious service attendance | Never                                    | 0.839      | (0.828, 0.849) | 0.005 | 1.34e-10 |
|                              | A few times a year                       | 0.866      | (0.852, 0.880) | 0.007 |          |
|                              | More than once a week                    | 0.901      | (0.879, 0.922) | 0.011 |          |
|                              | Once a week                              | 0.892      | (0.879, 0.905) | 0.007 |          |
|                              | One to three times a month               | 0.878      | (0.856, 0.901) | 0.012 |          |
|                              | 9-15                                     | 0.840      | (0.830, 0.850) | 0.005 | 1.11e-15 |
| Education                    | 16+                                      | 0.891      | (0.885, 0.898) | 0.003 |          |

| Variable                 | Category                                                          | Proportion | 95% CI         | SE    | p-value  |
|--------------------------|-------------------------------------------------------------------|------------|----------------|-------|----------|
| Immigration status       | Up to 8<br>Born in this<br>country                                | 0.926      | (0.781, 1.000) | 0.072 | 7.85e-01 |
|                          | Born in another<br>country                                        | 0.861      | (0.855, 0.868) | 0.004 |          |
|                          | No<br>religion/Atheist/Ag<br>nostic                               | 0.859      | (0.831, 0.887) | 0.014 |          |
| Religious<br>affiliation | Christianity                                                      | 0.853      | (0.840, 0.866) | 0.006 | 3.32e-02 |
|                          | Combined                                                          | 0.863      | (0.855, 0.871) | 0.004 |          |
|                          | Spiritism                                                         | 0.894      | (0.865, 0.922) | 0.015 |          |
|                          | Umbanda,<br>Candomblé, and<br>other African-<br>derived religions | *          | *              | *     |          |
|                          | Buddhism                                                          | *          | *              | *     |          |
|                          | Islam                                                             | *          | *              | *     |          |
|                          | Chinese<br>folk/traditional<br>religion                           | *          | *              | *     |          |
|                          | Hinduism                                                          | *          | *              | *     |          |
|                          | Judaism                                                           | 0.843      | *              | *     |          |
|                          | Primal, Animist, or<br>Folk religion                              | *          | *              | *     |          |

**Table S23d. United States: Childhood predictors regression analysis**

| Variable                                                        | Category                                                                                                                | Risk-Ratio                       | logRR SE                         | RR 95% CI                                                | Global p-value |
|-----------------------------------------------------------------|-------------------------------------------------------------------------------------------------------------------------|----------------------------------|----------------------------------|----------------------------------------------------------|----------------|
| Relationship with your mother growing up                        | (Ref: Very bad/somewhat bad)<br>Very good/somewhat good                                                                 | 1.000                            | 0.012                            | (0.98,1.02)                                              | 0.611          |
| Relationship with your father growing up                        | (Ref: Very bad/somewhat bad)<br>Very good/somewhat good                                                                 | 1.001                            | 0.010                            | (0.98,1.02)                                              | 0.597          |
| Parents married to each other when you were around 12 years old | (Ref: Parents married)<br>One or both of them had died<br>Parents were divorced<br>Parents were never married<br>Unsure | 0.996<br>1.023<br>1.002<br>1.025 | 0.027<br>0.011<br>0.024<br>0.056 | (0.94,1.05)<br>(1.00,1.04)<br>(0.96,1.05)<br>(0.92,1.14) | 0.154          |
| Feelings about familys household income when growing up         | (Ref: Got by)<br>Found it difficult<br>Found it very difficult<br>Lived comfortably                                     | 0.999<br>0.992<br>1.019          | 0.012<br>0.019<br>0.007          | (0.98,1.02)<br>(0.96,1.03)<br>(1.00,1.03)                | 0.027          |
| Physically or sexually abused when growing up                   | (Ref: No)                                                                                                               | 1.013                            | 0.009                            | (1.00,1.03)                                              | 0.189          |
| Felt like an outsider in your family when growing up            | (Ref: No)<br>Yes                                                                                                        | 0.979                            | 0.010                            | (0.96,1.00)                                              | 0.045          |
| Your health when growing up                                     | (Ref: Good)<br>Excellent<br>Fair<br>Poor<br>Very good                                                                   | 1.024<br>1.017<br>1.012<br>1.012 | 0.011<br>0.022<br>0.043<br>0.012 | (1.00,1.05)<br>(0.97,1.06)<br>(0.93,1.10)<br>(0.99,1.04) | 0.156          |
| Born in This                                                    | (Ref: Born in this                                                                                                      |                                  |                                  |                                                          | 0.398          |

| Variable                                                                                  | Category                                  | Risk-Ratio | logRR SE | RR 95% CI   | Global p-value |
|-------------------------------------------------------------------------------------------|-------------------------------------------|------------|----------|-------------|----------------|
| country                                                                                   | country)                                  |            |          |             |                |
|                                                                                           | Born in another country                   | 1.014      | 0.015    | (0.98,1.04) |                |
| How Often You Attended Religious Services or Worshipped When You Were Around 12 Years Old | (Ref: Never)                              |            |          |             | 0.003          |
|                                                                                           | At least once a week                      | 1.038      | 0.012    | (1.01,1.06) |                |
|                                                                                           | Less than once a month                    | 1.022      | 0.014    | (0.99,1.05) |                |
|                                                                                           | One to three times a month                | 1.044      | 0.014    | (1.02,1.07) |                |
| Year of birth (age group)                                                                 | (Ref: 1998-2005; current age: 18-24)      |            |          |             | 0.058          |
|                                                                                           | 1943 or earlier (current age: 80+ years)  | 1.075      | 0.035    | (1.00,1.15) |                |
|                                                                                           | 1943-1953 (current age: 70-79 years)      | 1.078      | 0.034    | (1.01,1.15) |                |
|                                                                                           | 1953-1963 (current age: 60-69 years)      | 1.082      | 0.034    | (1.01,1.16) |                |
|                                                                                           | 1963-1973 (current age: 50-59 years)      | 1.063      | 0.034    | (0.99,1.14) |                |
|                                                                                           | 1973-1983 (current age: 40-49 years)      | 1.056      | 0.034    | (0.99,1.13) |                |
|                                                                                           | 1983-1993 (current age: 30-39 years)      | 1.058      | 0.034    | (0.99,1.13) |                |
|                                                                                           | 1993-1998 (current age: 25-29 years)      | 1.025      | 0.038    | (0.95,1.10) |                |
| Religion when twelve years old                                                            | (Ref: No religion/Atheist/Agnostic)       |            |          |             | 0.141          |
|                                                                                           | Christianity                              | 0.997      | 0.013    | (0.97,1.02) |                |
|                                                                                           | Collapsed affiliations with prevalence<3% | 0.995      | 0.028    | (0.94,1.05) |                |
|                                                                                           | Judaism                                   | 0.957      | 0.021    | (0.92,1.00) |                |
| Race plurality (prominent race/ethnic group [0] or not [1])                               | (Ref: Plurality group)                    |            |          |             | 0.006          |
|                                                                                           | Non-plurality groups                      | 0.977      | 0.008    | (0.96,0.99) |                |

**Table S23e. United States: Sensitivity to unmeasured confounding of childhood predictors**

| Variable                                                                                 | Category                                                                                                                 | E-value for Estimate         | E-value for 95% CI           |
|------------------------------------------------------------------------------------------|--------------------------------------------------------------------------------------------------------------------------|------------------------------|------------------------------|
| Relationship with your mother growing up                                                 | (Ref: Very bad/somewhat bad)<br>Very good/somewhat good                                                                  | 1.02                         | 1.00                         |
| Relationship with your father growing up                                                 | (Ref: Very bad/somewhat bad)<br>Very good/somewhat good                                                                  | 1.04                         | 1.00                         |
| Parents married to each other when you were around 12 years old                          | (Ref: Parents married)<br>One or both of them had died<br>Parents were divorced<br>Parents were never married<br>Unsure  | 1.07<br>1.18<br>1.05<br>1.18 | 1.00<br>1.05<br>1.00<br>1.00 |
| Feelings about family household income when growing up                                   | (Ref: Got by)<br>Found it difficult<br>Found it very difficult<br>Lived comfortably                                      | 1.03<br>1.10<br>1.16         | 1.00<br>1.00<br>1.08         |
| Physically or sexually abused when growing up                                            | (Ref: No)                                                                                                                | 1.13                         | 1.00                         |
| Felt like an outsider in your family when growing up                                     | (Ref: No)<br>Yes                                                                                                         | 1.17                         | 1.03                         |
| Your health when growing up                                                              | (Ref: Good)<br>Excellent<br>Fair<br>Poor<br>Very good                                                                    | 1.18<br>1.15<br>1.12<br>1.12 | 1.05<br>1.00<br>1.00<br>1.00 |
| Born in This country                                                                     | (Ref: Born in this country)<br>Born in another country                                                                   | 1.13                         | 1.00                         |
| How Often You Attended Religious Services or Worshiped When You Were Around 12 Years Old | (Ref: Never)<br>At least once a week<br>Less than once a month<br>One to three times a month                             | 1.24<br>1.17<br>1.26         | 1.13<br>1.00<br>1.14         |
| Year of birth (age group)                                                                | (Ref: 1998-2005; current age: 18-24)<br>1943 or earlier (current age: 80+ years)<br>1943-1953 (current age: 70-79 years) | 1.36<br>1.37                 | 1.06<br>1.11                 |

| Variable                                                    | Category                                  | E-value for Estimate | E-value for 95% CI |
|-------------------------------------------------------------|-------------------------------------------|----------------------|--------------------|
|                                                             | 1953-1963 (current age: 60-69 years)      | 1.38                 | 1.13               |
|                                                             | 1963-1973 (current age: 50-59 years)      | 1.32                 | 1.00               |
|                                                             | 1973-1983 (current age: 40-49 years)      | 1.30                 | 1.00               |
|                                                             | 1983-1993 (current age: 30-39 years)      | 1.31                 | 1.00               |
|                                                             | 1993-1998 (current age: 25-29 years)      | 1.18                 | 1.00               |
| Religion when twelve years old                              | (Ref: No religion/Atheist/Agnostic)       |                      |                    |
|                                                             | Christianity                              | 1.06                 | 1.00               |
|                                                             | Collapsed affiliations with prevalence<3% | 1.08                 | 1.00               |
|                                                             | Judaism                                   | 1.26                 | 1.05               |
| Race plurality (prominent race/ethnic group [0] or not [1]) | (Ref: Plurality group)                    |                      |                    |
|                                                             | Non-plurality groups                      | 1.18                 | 1.09               |

Table S24. Summary of proportion estimates by country

| Variable       | Category                                 | Hong      |           |        |       |       |         |       |       |           |        |       |       |        |         | South       |        |        |       |        |          | United |         |        |
|----------------|------------------------------------------|-----------|-----------|--------|-------|-------|---------|-------|-------|-----------|--------|-------|-------|--------|---------|-------------|--------|--------|-------|--------|----------|--------|---------|--------|
|                |                                          | Argentina | Australia | Brazil | China | Egypt | Germany | Kong  | India | Indonesia | Israel | Japan | Kenya | Mexico | Nigeria | Philippines | Poland | Africa | Spain | Sweden | Tanzania | Turkey | Kingdom | States |
| Age group      | 1998-2005 (current age: 18-24 years)     | 0.840     | 0.933     | 0.777  | 0.870 | 0.811 | 0.883   | 0.634 | 0.681 | 0.895     | 0.899  | 0.440 | 0.813 | 0.862  | 0.904   | 0.903       | 0.737  | 0.904  | 0.840 | 0.841  | 0.644    | 0.749  | 0.718   | 0.795  |
|                | 1943 or earlier (current age: 80+ years) | 0.833     | 0.873     | 0.769  | 1.000 | 1.000 | 0.811   | *     | 0.549 | 0.695     | 0.801  | 0.636 | 0.459 | 0.669  | 0.972   | 0.525       | 0.651  | 0.765  | 0.917 | 0.874  | 0.419    | 0.826  | 0.825   | 0.878  |
|                | 1943-1953 (current age: 70-79 years)     | 0.759     | 0.865     | 0.757  | 0.817 | 0.726 | 0.841   | 0.561 | 0.501 | 0.540     | 0.775  | 0.586 | 0.686 | 0.794  | 0.871   | 0.807       | 0.675  | 0.929  | 0.775 | 0.840  | 0.401    | 0.529  | 0.658   | 0.882  |
|                | 1953-1963 (current age: 60-69 years)     | 0.792     | 0.873     | 0.749  | 0.830 | 0.661 | 0.835   | 0.428 | 0.507 | 0.628     | 0.812  | 0.498 | 0.658 | 0.825  | 0.793   | 0.816       | 0.633  | 0.934  | 0.793 | 0.843  | 0.457    | 0.712  | 0.725   | 0.884  |
|                | 1963-1973 (current age: 50-59 years)     | 0.817     | 0.856     | 0.744  | 0.832 | 0.727 | 0.803   | 0.475 | 0.586 | 0.687     | 0.859  | 0.405 | 0.668 | 0.814  | 0.908   | 0.770       | 0.685  | 0.900  | 0.787 | 0.845  | 0.488    | 0.688  | 0.743   | 0.863  |
|                | 1973-1983 (current age: 40-49 years)     | 0.811     | 0.864     | 0.723  | 0.812 | 0.707 | 0.824   | 0.473 | 0.641 | 0.746     | 0.847  | 0.379 | 0.707 | 0.811  | 0.906   | 0.840       | 0.691  | 0.869  | 0.822 | 0.829  | 0.464    | 0.786  | 0.706   | 0.851  |
|                | 1983-1993 (current age: 30-39 years)     | 0.877     | 0.863     | 0.704  | 0.807 | 0.718 | 0.830   | 0.425 | 0.627 | 0.819     | 0.837  | 0.334 | 0.753 | 0.795  | 0.899   | 0.859       | 0.712  | 0.909  | 0.793 | 0.830  | 0.514    | 0.701  | 0.738   | 0.852  |
|                | 1993-1998 (current age: 25-29 years)     | 0.788     | 0.925     | 0.696  | 0.820 | 0.767 | 0.890   | 0.428 | 0.624 | 0.889     | 0.889  | 0.317 | 0.788 | 0.825  | 0.903   | 0.898       | 0.718  | 0.913  | 0.774 | 0.818  | 0.620    | 0.781  | 0.793   | 0.819  |
|                | Male                                     | 0.821     | 0.859     | 0.734  | 0.795 | 0.759 | 0.822   | 0.492 | 0.668 | 0.800     | 0.827  | 0.378 | 0.785 | 0.835  | 0.903   | 0.842       | 0.675  | 0.905  | 0.795 | 0.803  | 0.597    | 0.706  | 0.713   | 0.840  |
|                | Female                                   | 0.825     | 0.889     | 0.733  | 0.857 | 0.724 | 0.850   | 0.450 | 0.573 | 0.775     | 0.868  | 0.505 | 0.723 | 0.803  | 0.893   | 0.861       | 0.699  | 0.899  | 0.808 | 0.871  | 0.505    | 0.742  | 0.738   | 0.879  |
|                | Other                                    | 1.000     | 1.000     | 0.672  | *     | *     | 0.701   | *     | *     | 1.000     | *      | 0.365 | 1.000 | 1.000  | 1.000   | 0.836       | 1.000  | *0.037 | 0.915 | *      | *        | 0.565  | 0.951   |        |
| Marital status | Single/Never been married                | 0.819     | 0.875     | 0.709  | 0.822 | 0.815 | 0.848   | 0.451 | 0.698 | 0.907     | 0.896  | 0.409 | 0.813 | 0.822  | 0.909   | 0.881       | 0.713  | 0.898  | 0.825 | 0.827  | 0.656    | 0.737  | 0.707   | 0.824  |
|                | Divorced                                 | 0.902     | 0.866     | 0.804  | 0.905 | 0.867 | 0.820   | 0.284 | 0.871 | 0.781     | 0.886  | 0.466 | 0.719 | 0.868  | 0.889   | 1.000       | 0.651  | 0.979  | 0.711 | 0.842  | 0.370    | 0.594  | 0.691   | 0.859  |
|                | Domestic partner                         | 0.840     | 0.881     | 0.753  | 0.827 | *     | 0.917   | 0.514 | 0.452 | 0.740     | 0.880  | 0.545 | 0.768 | 0.784  | 0.952   | 0.894       | 0.647  | 0.935  | 0.832 | 0.828  | 0.511    | *      | 0.748   | 0.865  |
|                | Married                                  | 0.800     | 0.879     | 0.746  | 0.822 | 0.716 | 0.827   | 0.487 | 0.617 | 0.764     | 0.828  | 0.440 | 0.728 | 0.843  | 0.893   | 0.828       | 0.685  | 0.903  | 0.802 | 0.848  | 0.513    | 0.731  | 0.733   | 0.875  |
|                | Separated                                | 0.863     | 0.841     | 0.695  | 0.876 | 0.800 | 0.820   | 1.000 | 0.461 | 0.733     | 0.828  | 0.464 | 0.722 | 0.785  | 0.943   | 0.771       | 0.666  | 0.829  | 0.730 | 0.839  | 0.527    | 0.567  | 0.834   | 0.880  |
|                | Widowed                                  | 0.783     | 0.873     | 0.706  | 0.836 | 0.698 | 0.804   | 0.364 | 0.436 | 0.644     | 0.763  | 0.593 | 0.646 | 0.778  | 0.844   | 0.817       | 0.697  | 0.887  | 0.781 | 0.829  | 0.480    | 0.710  | 0.733   | 0.853  |
|                | Employed for an employer                 | 0.823     | 0.866     | 0.758  | 0.813 | 0.743 | 0.834   | 0.472 | 0.630 | 0.788     | 0.867  | 0.388 | 0.802 | 0.835  | 0.943   | 0.849       | 0.709  | 0.893  | 0.815 | 0.827  | 0.697    | 0.717  | 0.735   | 0.847  |
| Employment     | Homemaker                                | 0.790     | 0.911     | 0.679  | 0.814 | 0.697 | 0.840   | 0.413 | 0.575 | 0.755     | 0.709  | 0.541 | 0.646 | 0.770  | 0.905   | 0.831       | 0.710  | 0.892  | 0.817 | 0.860  | 0.444    | 0.743  | 0.661   | 0.905  |
|                | None of these/Other                      | 0.763     | 0.861     | 0.789  | 0.773 | 0.846 | 0.803   | 0.224 | 0.645 | 0.680     | 0.762  | 0.510 | 0.730 | 0.816  | 0.857   | 0.808       | 0.688  | 0.922  | 0.825 | 0.825  | 0.412    | 0.638  | 0.628   | 0.816  |

**Table S24. Summary of proportion estimates by country**

| Variable                     | Category                                                | Hong      |           |        |       |       |         |       |       |           |        | South |       |        |         |             |        |        |       |        |          | United |         |        |   |
|------------------------------|---------------------------------------------------------|-----------|-----------|--------|-------|-------|---------|-------|-------|-----------|--------|-------|-------|--------|---------|-------------|--------|--------|-------|--------|----------|--------|---------|--------|---|
|                              |                                                         | Argentina | Australia | Brazil | China | Egypt | Germany | Kong  | India | Indonesia | Israel | Japan | Kenya | Mexico | Nigeria | Philippines | Poland | Africa | Spain | Sweden | Tanzania | Turkey | Kingdom | States |   |
| Religious service attendance | Retired                                                 | 0.735     | 0.865     | 0.783  | 0.843 | 0.678 | 0.821   | 0.484 | 0.510 | 0.737     | 0.823  | 0.531 | 0.657 | 0.790  | 0.875   | 0.832       | 0.641  | 0.908  | 0.768 | 0.846  | 0.404    | 0.753  | 0.707   | 0.881  |   |
|                              | Self-employed                                           | 0.881     | 0.889     | 0.731  | 0.852 | 0.797 | 0.886   | 0.409 | 0.643 | 0.795     | 0.841  | 0.531 | 0.740 | 0.841  | 0.893   | 0.857       | 0.686  | 0.914  | 0.838 | 0.879  | 0.550    | 0.706  | 0.838   | 0.906  |   |
|                              | Student                                                 | 0.855     | 0.930     | 0.821  | 0.854 | 0.847 | 0.902   | 0.861 | 0.728 | 0.959     | 0.948  | 0.499 | 0.858 | 0.881  | 0.894   | 0.920       | 0.726  | 0.851  | 0.842 | 0.862  | 0.757    | 0.692  | 0.698   | 0.858  |   |
|                              | Unemployed and looking for a job                        | 0.787     | 0.958     | 0.662  | 0.721 | 0.741 | 0.750   | 0.444 | 0.675 | 0.857     | 0.760  | 0.325 | 0.763 | 0.827  | 0.901   | 0.830       | 0.605  | 0.911  | 0.724 | 0.755  | 0.598    | 0.780  | 0.624   | 0.776  |   |
|                              | Never                                                   | 0.817     | 0.868     | 0.681  | 0.808 | 0.721 | 0.812   | 0.426 | 0.551 | 0.795     | 0.818  | 0.416 | 0.728 | 0.778  | 0.899   | 0.850       | 0.675  | 0.852  | 0.792 | 0.814  | 0.434    | 0.651  | 0.674   | 0.839  |   |
|                              | A few times a year                                      | 0.833     | 0.891     | 0.744  | 0.860 | 0.777 | 0.883   | 0.459 | 0.654 | 0.820     | 0.871  | 0.540 | 0.777 | 0.828  | 0.885   | 0.838       | 0.667  | 0.893  | 0.797 | 0.885  | 0.574    | 0.700  | 0.799   | 0.866  |   |
|                              | More than once a week                                   | 0.836     | 0.914     | 0.781  | 0.922 | 0.739 | 0.959   | 0.931 | 0.654 | 0.794     | 0.889  | 0.688 | 0.734 | 0.872  | 0.902   | 0.833       | 0.773  | 0.900  | 0.854 | 0.909  | 0.562    | 0.721  | 0.910   | 0.901  |   |
| Education                    | Once a week                                             | 0.798     | 0.876     | 0.720  | 0.883 | 0.761 | 0.850   | 0.586 | 0.613 | 0.765     | 0.818  | 0.699 | 0.759 | 0.805  | 0.891   | 0.862       | 0.709  | 0.903  | 0.822 | 0.905  | 0.552    | 0.838  | 0.792   | 0.892  |   |
|                              | One to three times a month                              | 0.856     | 0.910     | 0.760  | 0.933 | 0.771 | 0.843   | 0.590 | 0.617 | 0.813     | 0.845  | 0.458 | 0.760 | 0.836  | 0.903   | 0.859       | 0.674  | 0.939  | 0.834 | 0.860  | 0.514    | 0.693  | 0.794   | 0.878  |   |
|                              | 9-15                                                    | 0.838     | 0.862     | 0.747  | 0.835 | 0.792 | 0.814   | 0.464 | 0.704 | 0.882     | 0.822  | 0.416 | 0.802 | 0.822  | 0.910   | 0.869       | 0.666  | 0.910  | 0.785 | 0.820  | 0.709    | 0.730  | 0.713   | 0.840  |   |
|                              | 16+                                                     | 0.892     | 0.905     | 0.780  | 0.865 | 0.855 | 0.891   | 0.502 | 0.729 | 0.925     | 0.896  | 0.544 | 0.879 | 0.879  | 0.949   | 0.895       | 0.737  | 0.959  | 0.889 | 0.893  | 0.779    | 0.756  | 0.821   | 0.891  |   |
|                              | Up to 8                                                 | 0.772     | 0.809     | 0.676  | 0.816 | 0.688 | 0.709   | 0.414 | 0.588 | 0.696     | 0.650  | 0.327 | 0.675 | 0.755  | 0.878   | 0.792       | 0.696  | 0.868  | 0.723 | 0.756  | 0.495    | 0.694  | 0.592   | 0.926  |   |
| Immigration status           | Born in this country                                    | 0.819     | 0.879     | 0.736  | 0.825 | 0.742 | 0.836   | 0.450 | 0.622 | 0.787     | 0.853  | 0.445 | 0.753 | 0.815  | 0.898   | 0.852       | 0.688  | 0.904  | 0.802 | 0.835  | 0.548    | 0.725  | 0.715   | 0.861  |   |
|                              | Born in another country                                 | 0.925     | 0.862     | 0.456  | 0.880 | 0.829 | 0.844   | 0.649 | 0.577 | 0.877     | 0.830  | 0.421 | 0.742 | 0.969  | 0.941   | 0.726       | 0.705  | 0.861  | 0.795 | 0.866  | 0.443    | 0.706  | 0.803   | 0.859  |   |
| Religious affiliation        | No religion/Atheist/Agnostic                            | 0.844     | 0.884     | 0.743  | 0.811 | *     | 0.839   | 0.425 | *     | *         | *      | 0.396 | *     | 0.773  | *       | *           | 0.768  | 0.887  | 0.795 | 0.832  | *        | 0.634  | 0.717   | 0.853  |   |
|                              | Christianity                                            | 0.816     | 0.865     | 0.726  | *     | *     | 0.834   | 0.542 | *     | 0.801     | *      | *     | 0.758 | 0.822  | 0.917   | 0.851       | 0.679  | 0.904  | 0.809 | 0.840  | 0.580    | *      | 0.733   | 0.863  |   |
|                              | Combined                                                | 0.869     | 0.867     | 0.744  | 0.875 | 0.686 | 0.838   | 0.585 | 0.571 | 0.806     | 0.799  | 0.640 | 0.755 | 0.988  | 0.947   | 0.952       | 0.768  | 0.943  | 0.722 | 0.857  | 0.447    | 0.985  | 0.728   | 0.894  |   |
|                              | Spiritism                                               | *         | *         | 0.769  | *     | *     | *       | *     | *     | *         | *      | *     | *     | *      | *       | *           | *      | *      | *     | *      | *        | *      | *       | *      | * |
|                              | Umbanda, Candomblé, and other African-derived religions | *         | *         | 0.799  | *     | *     | *       | *     | *     | *         | *      | *     | *     | *      | *       | *           | *      | *      | *     | *      | *        | *      | *       | *      | * |
|                              | Buddhism                                                | *         | *         | *      | 0.863 | *     | *       | 0.440 | *     | *         | *      | *     | 0.509 | *      | *       | *           | *      | *      | *     | *      | *        | *      | *       | *      | * |
|                              | Islam                                                   | *         | *         | *      | *     | 0.743 | *       | *     | 0.535 | 0.786     | 0.672  | *     | 0.698 | *      | 0.879   | 0.849       | *      | *      | *     | *      | *        | 0.501  | 0.727   | *      | * |
|                              | Chinese folk/traditional                                | *         | *         | *      | *     | *     | *       | 0.669 | *     | *         | *      | *     | *     | *      | *       | *           | *      | *      | *     | *      | *        | *      | *       | *      | * |

Table S24. Summary of proportion estimates by country

| Variable | Category                 | Hong      |           |        |       |       |         |      |       |           |        | South |       |        |         |             | United |        |       |        |          |        |         |        |
|----------|--------------------------|-----------|-----------|--------|-------|-------|---------|------|-------|-----------|--------|-------|-------|--------|---------|-------------|--------|--------|-------|--------|----------|--------|---------|--------|
|          |                          | Argentina | Australia | Brazil | China | Egypt | Germany | Kong | India | Indonesia | Israel | Japan | Kenya | Mexico | Nigeria | Philippines | Poland | Africa | Spain | Sweden | Tanzania | Turkey | Kingdom | States |
|          | religion                 |           |           |        |       |       |         |      |       |           |        |       |       |        |         |             |        |        |       |        |          |        |         |        |
|          | Hinduism                 | *         | *         | *      | *     | *     | *       | *    | 0.639 | *         | *      | *     | *     | *      | *       | *           | *      | *      | *     | *      | *        | *      | *       | *      |
|          | Judaism                  | *         | *         | *      | *     | *     | *       | *    | *     | *         | 0.891  | *     | *     | *      | *       | *           | *      | *      | *     | *      | *        | *      | *       | 0.843  |
|          | Primal, Animist, or Folk |           |           |        |       |       |         |      |       |           |        |       |       |        |         |             |        |        |       |        |          |        |         |        |
|          | religion                 | *         | *         | *      | *     | *     | *       | *    | *     | *         | *      | *     | *     | *      | *       | *           | *      | 0.870  | *     | *      | *        | *      | *       | *      |

## Forest Plots (Demographics)

Figure S1. Forest plot for `Age group` - `1998-2005 (current age: 18-24 years)`

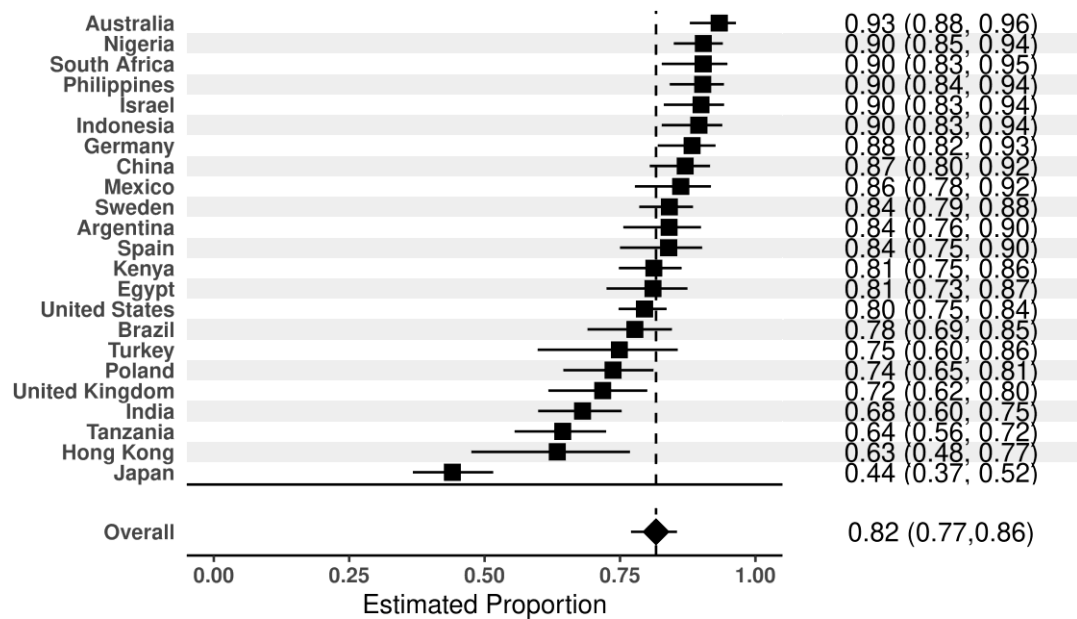

Probability-scale:  $\tau=0.099$ ;  
 Logit-scale:  $\tau=0.658$ ;  $Q(df=22)=308.61$ ,  $p<.001$ ; Q-profile 95% CI [0.478, 0.911];  $I^2=91.83$ ;  
 Plot is based on back transformed bounds after using approximate logit SE that aren't guaranteed to match the robust SE of a proportion.

Figure S2. Forest plot for `Age group` - `80 or older`

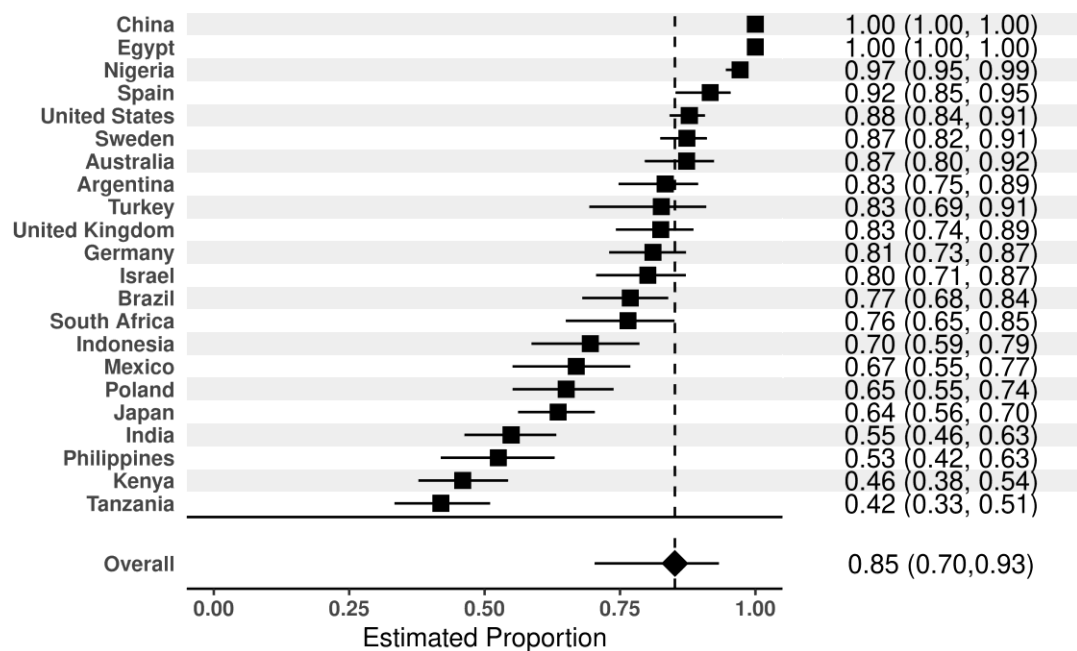

Probability-scale:  $\tau=0.264$ ;  
 Logit-scale:  $\tau=2.087$ ;  $Q(df=21)=539.84$ ,  $p<.001$ ; Q-profile 95% CI [1.278, 2.759];  $I^2=99.11$ ;  
 Plot is based on back transformed bounds after using approximate logit SE that aren't guaranteed to match the robust SE of a proportion.  
 Excluded countries: Hong Kong

Figure S3. Forest plot for `Age group` - `1943-1953 (current age: 70-79 years)`

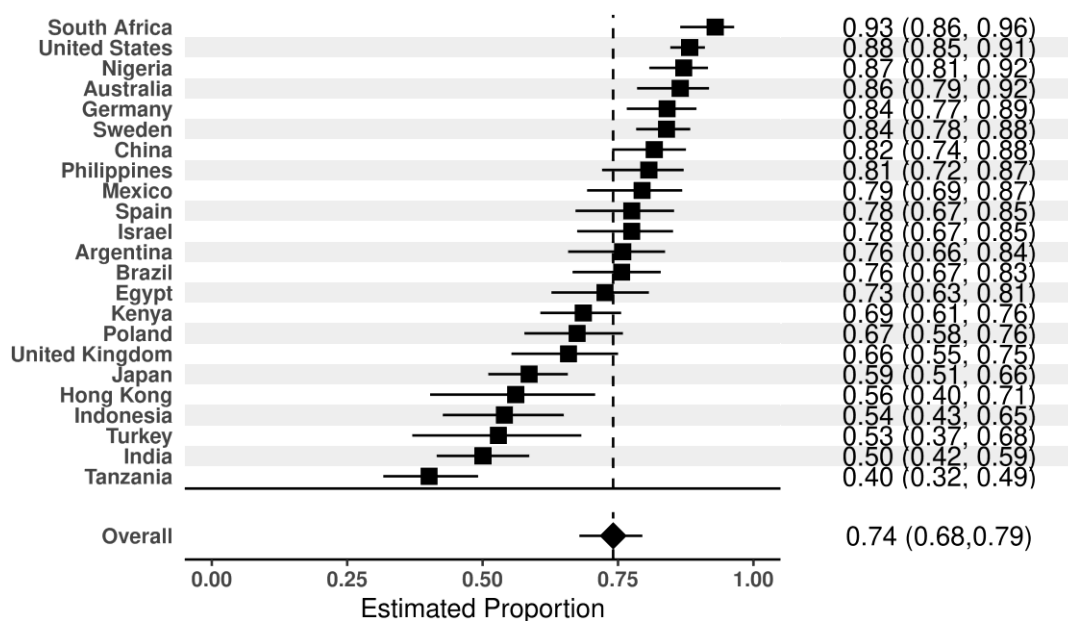

Probability-scale:  $\tau=0.137$ ;  
 Logit-scale:  $\tau=0.714$ ;  $Q(df=22)=351.94$ ,  $p<.001$ ; Q-profile 95% CI [0.515, 0.978];  $I^2=93.48$ ;  
 Plot is based on back transformed bounds after using approximate logit SE that aren't guaranteed to match the robust SE of a proportion.

Figure S4. Forest plot for `Age group` - `1953-1963 (current age: 60-69 years)`

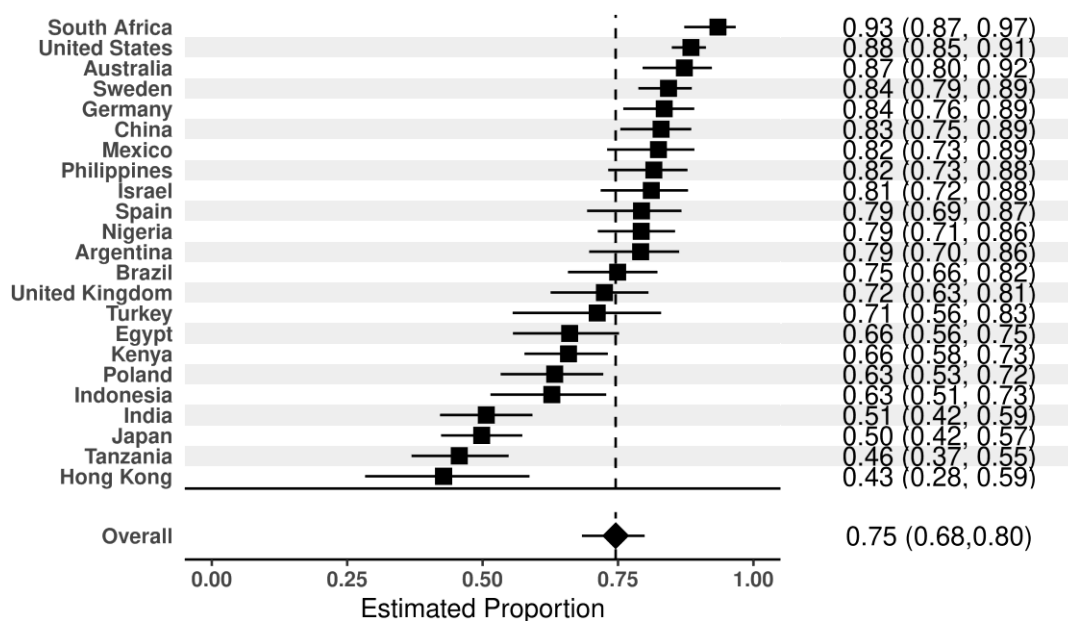

Probability-scale:  $\tau=0.137$ ;  
 Logit-scale:  $\tau=0.720$ ;  $Q(df=22)=362.70$ ,  $p<.001$ ; Q-profile 95% CI [0.519, 0.986];  $I^2=93.58$ ;  
 Plot is based on back transformed bounds after using approximate logit SE that aren't guaranteed to match the robust SE of a proportion.

Figure S5. Forest plot for `Age group` - `1963-1973 (current age: 50-59 years)`

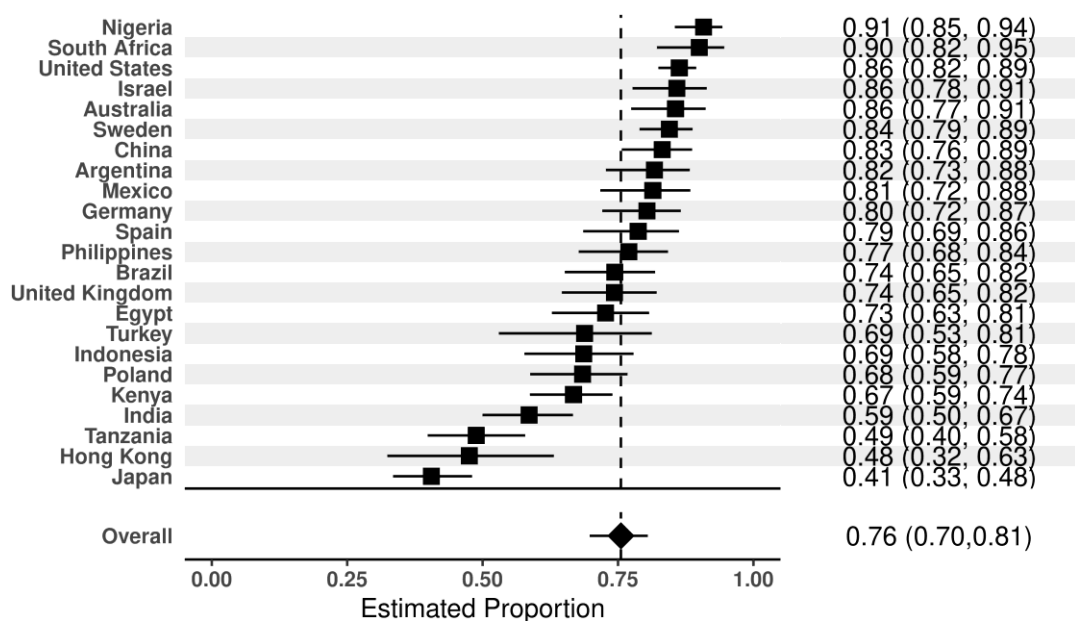

Probability-scale:  $\tau=0.126$ ;  
 Logit-scale:  $\tau=0.682$ ;  $Q(df=22)=358.40$ ,  $p<.001$ ; Q-profile 95% CI [0.496, 0.939];  $I^2=92.84$ ;  
 Plot is based on back transformed bounds after using approximate logit SE that aren't guaranteed to match the robust SE of a proportion.

Figure S6. Forest plot for `Age group` - `1973-1983 (current age: 40-49 years)`

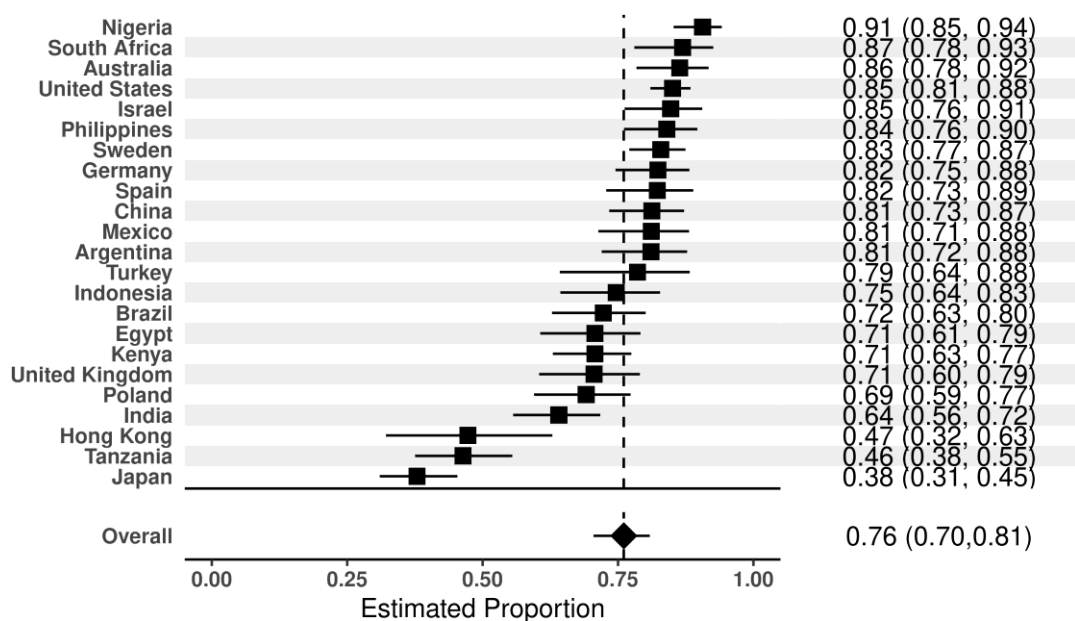

Probability-scale:  $\tau=0.122$ ;  
 Logit-scale:  $\tau=0.668$ ;  $Q(df=22)=356.47$ ,  $p<.001$ ; Q-profile 95% CI [0.488, 0.922];  $I^2=92.53$ ;  
 Plot is based on back transformed bounds after using approximate logit SE that aren't guaranteed to match the robust SE of a proportion.

Figure S7. Forest plot for `Age group` - `1983-1993 (current age: 30-39 years)`

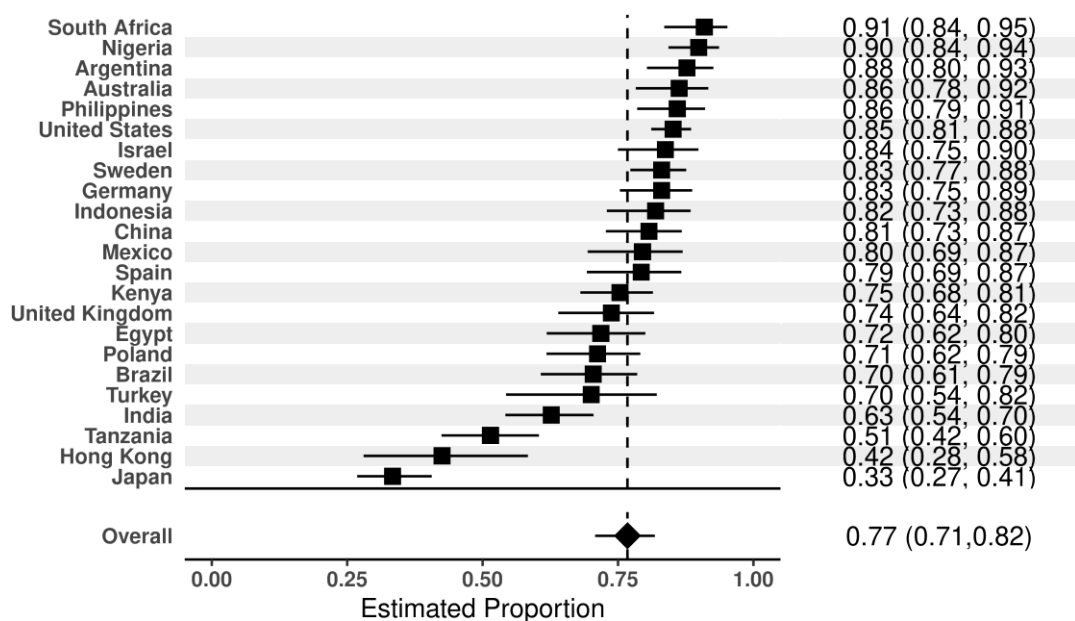

Probability-scale:  $\tau=0.130$ ;  
 Logit-scale:  $\tau=0.727$ ;  $Q(df=22)=397.63$ ,  $p<.001$ ; Q-profile 95% CI [0.530, 0.999];  $I^2=93.52$ ;  
 Plot is based on back transformed bounds after using approximate logit SE that aren't guaranteed to match the robust SE of a proportion.

Figure S8. Forest plot for `Age group` - `1993-1998 (current age: 25-29 years)`

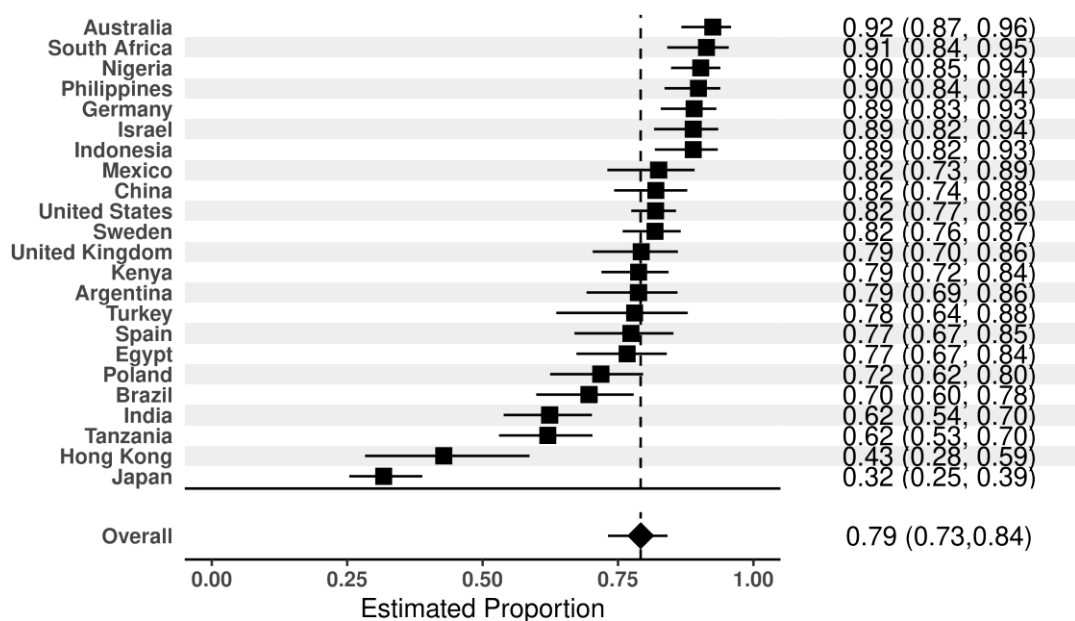

Probability-scale:  $\tau=0.130$ ;  
 Logit-scale:  $\tau=0.787$ ;  $Q(df=22)=421.05$ ,  $p<.001$ ; Q-profile 95% CI [0.574, 1.078];  $I^2=94.26$ ;  
 Plot is based on back transformed bounds after using approximate logit SE that aren't guaranteed to match the robust SE of a proportion.

Figure S9. Forest plot for `Gender`-`Male`

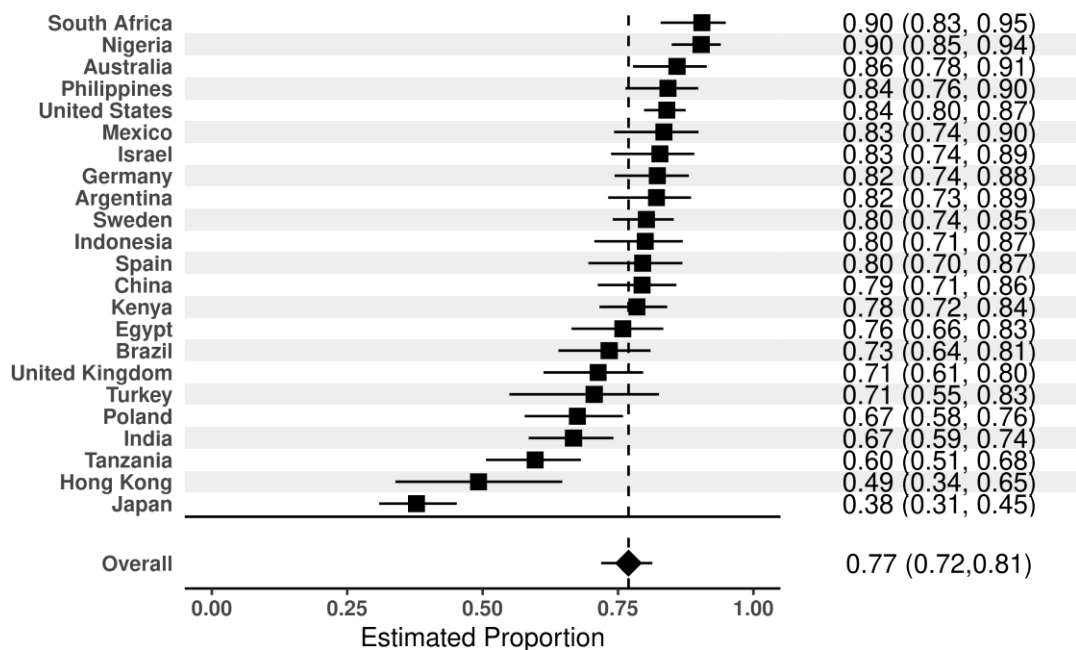

Probability-scale:  $\tau=0.110$ ;  
 Logit-scale:  $\tau=0.619$ ;  $Q(df=22)=301.66$ ,  $p<.001$ ; Q-profile 95% CI [0.447, 0.857];  $I^2=91.37$ ;  
 Plot is based on back transformed bounds after using approximate logit SE that aren't guaranteed to match the robust SE of a proportion.

Figure S10. Forest plot for `Gender`-`Female`

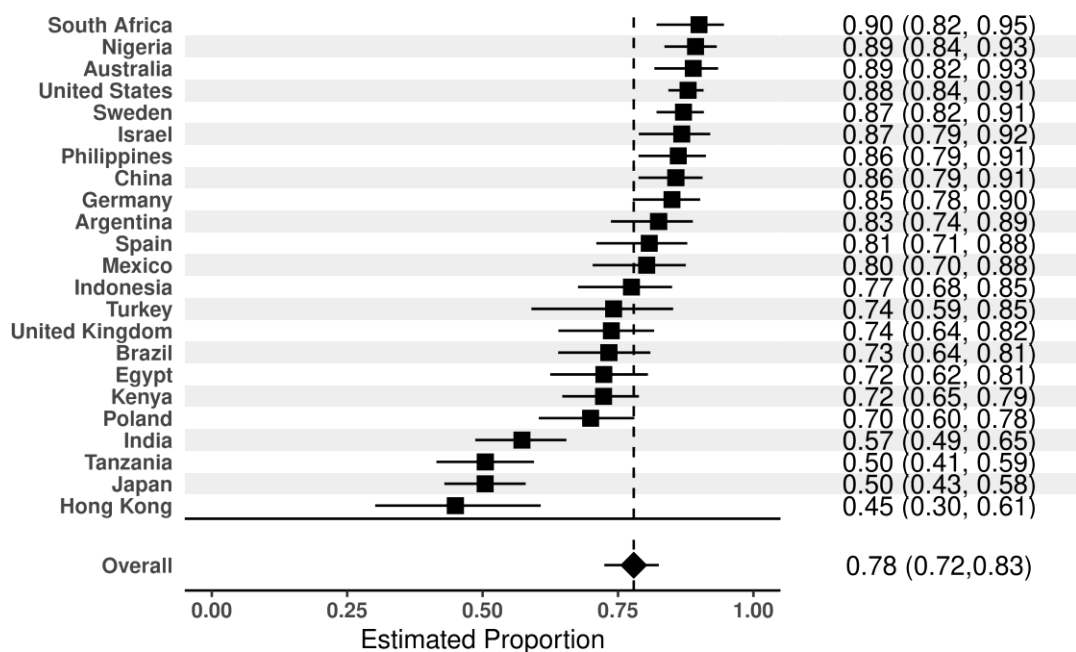

Probability-scale:  $\tau=0.118$ ;  
 Logit-scale:  $\tau=0.684$ ;  $Q(df=22)=341.41$ ,  $p<.001$ ; Q-profile 95% CI [0.497, 0.942];  $I^2=92.65$ ;  
 Plot is based on back transformed bounds after using approximate logit SE that aren't guaranteed to match the robust SE of a proportion.

Figure S11. Forest plot for `Gender`-`Other`

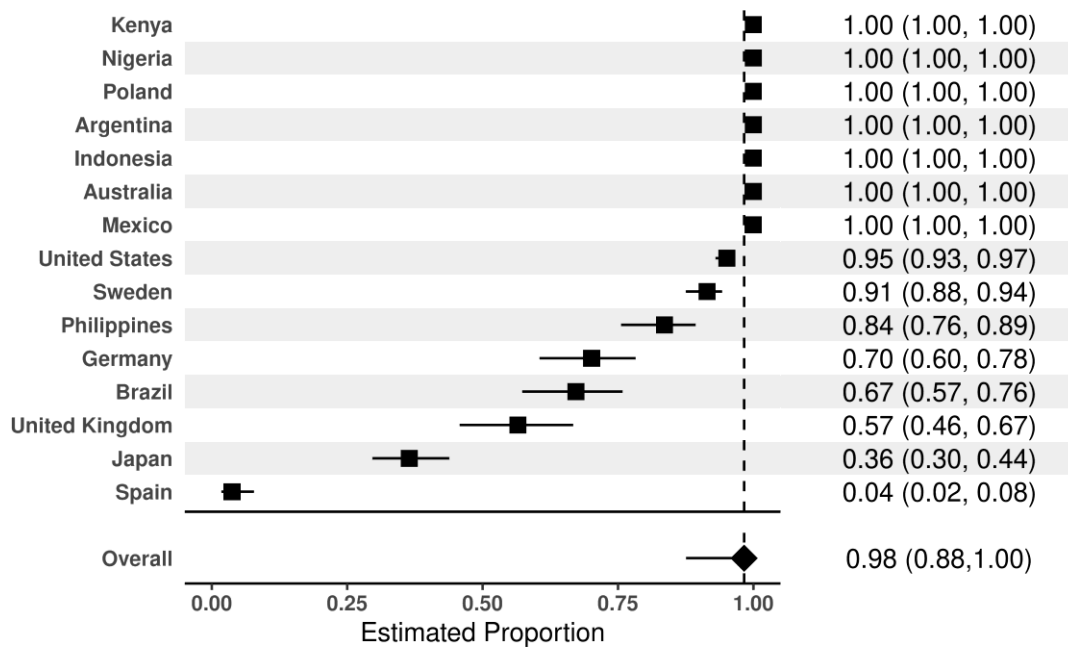

Probability-scale:  $\tau=0.069$ ;  
 Logit-scale:  $\tau=4.088$ ;  $Q(df=14)=892.34$ ,  $p<.001$ ; Q-profile 95% CI [2.815, 5.982];  $I^2=99.61$ ;  
 Plot is based on back transformed bounds after using approximate logit SE that  
 aren't guaranteed to match the robust SE of a proportion.  
 Excluded countries: Hong Kong, India, Egypt, Israel, South Africa, Tanzania, Turkiye

Figure S12. Forest plot for `Marital status`-`Single, never married`

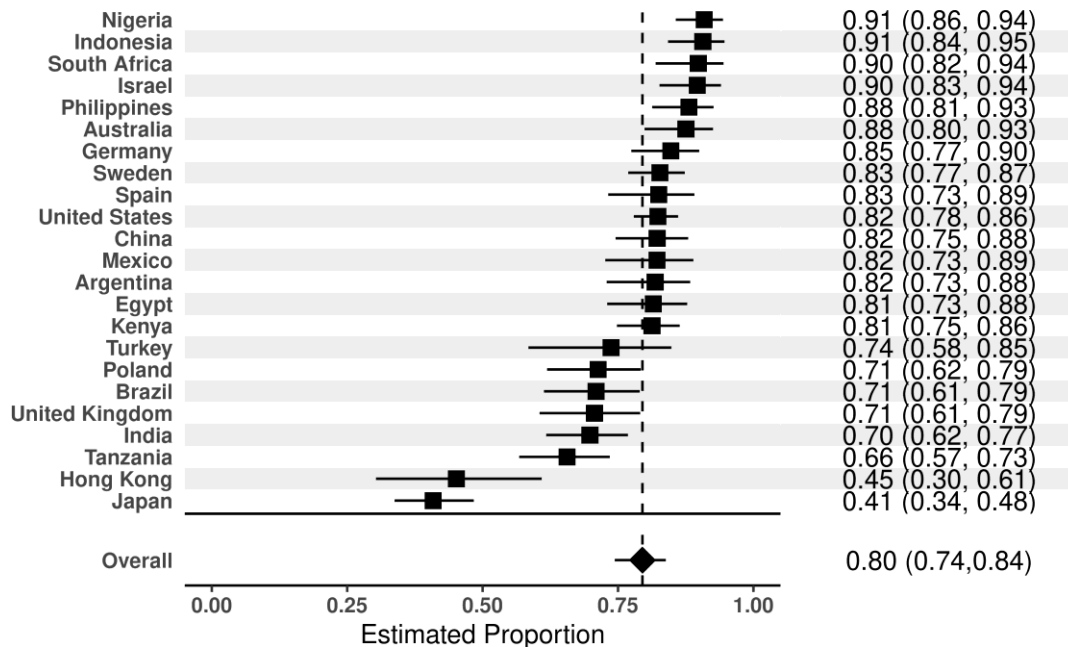

Probability-scale:  $\tau=0.110$ ;  
 Logit-scale:  $\tau=0.676$ ;  $Q(df=22)=315.78$ ,  $p<.001$ ; Q-profile 95% CI [0.487, 0.930];  $I^2=92.38$ ;  
 Plot is based on back transformed bounds after using approximate logit SE that  
 aren't guaranteed to match the robust SE of a proportion.

Figure S13. Forest plot for `Marital status`-`Divorced`

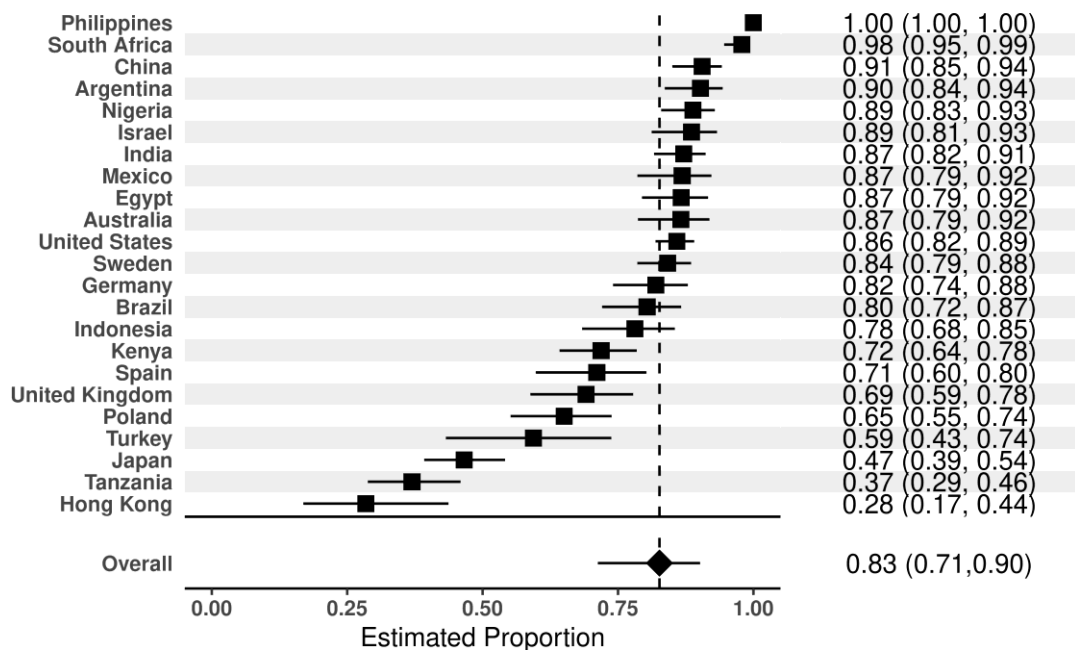

Probability-scale:  $\tau=0.225$ ;  
 Logit-scale:  $\tau=1.573$ ;  $Q(df=22)=534.06$ ,  $p<.001$ ; Q-profile 95% CI [0.936, 2.046];  $I^2=98.40$ ;  
 Plot is based on back transformed bounds after using approximate logit SE that  
 aren't guaranteed to match the robust SE of a proportion.

Figure S14. Forest plot for `Marital status`-`Domestic partner`

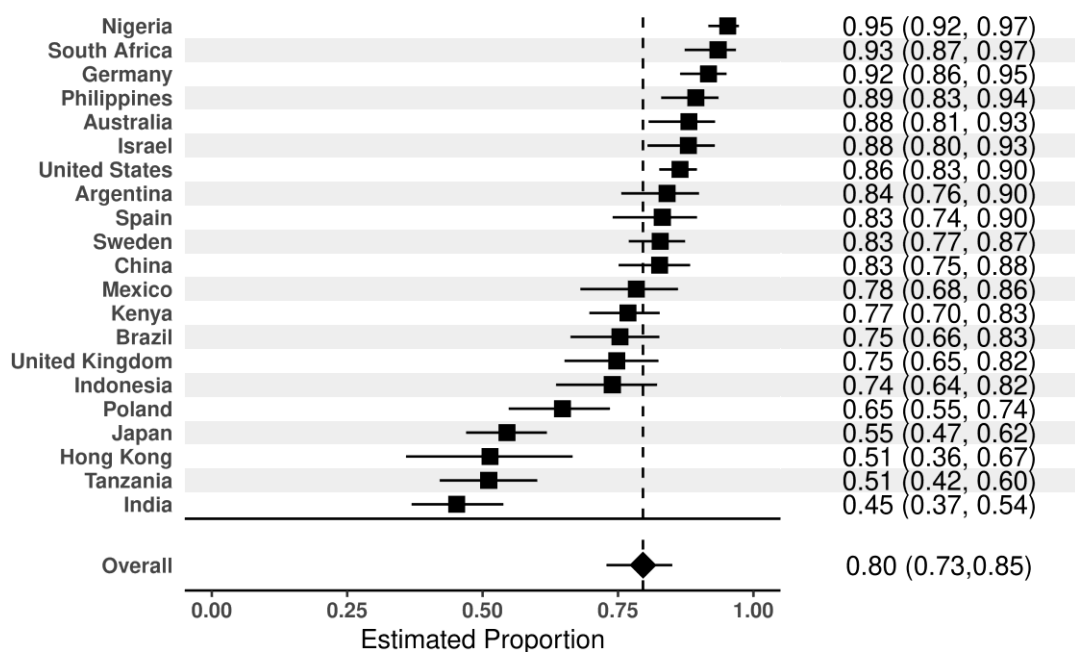

Probability-scale:  $\tau=0.138$ ;  
 Logit-scale:  $\tau=0.849$ ;  $Q(df=20)=404.83$ ,  $p<.001$ ; Q-profile 95% CI [0.610, 1.176];  $I^2=95.16$ ;  
 Plot is based on back transformed bounds after using approximate logit SE that  
 aren't guaranteed to match the robust SE of a proportion.  
 Excluded countries: Egypt, Turkiye

Figure S15. Forest plot for `Marital status`-`Married`

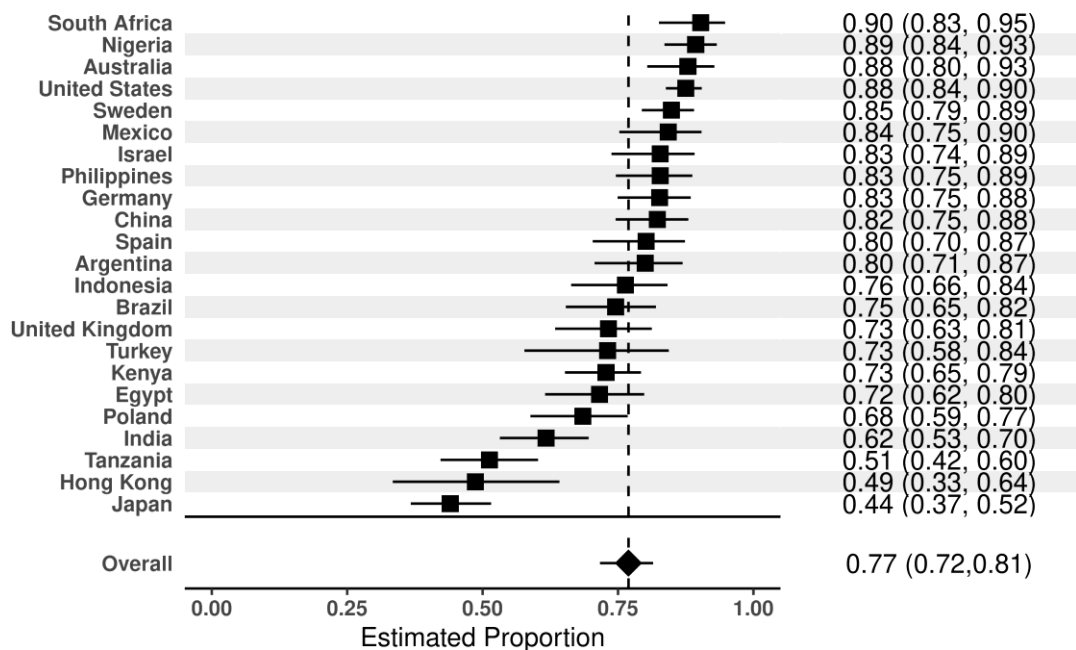

Probability-scale:  $\tau=0.114$ ;  
 Logit-scale:  $\tau=0.644$ ;  $Q(df=22)=325.96$ ,  $p<.001$ ; Q-profile 95% CI [0.468, 0.890];  $I^2=91.93$ ;  
 Plot is based on back transformed bounds after using approximate logit SE that  
 aren't guaranteed to match the robust SE of a proportion.

Figure S16. Forest plot for `Marital status`-`Separated`

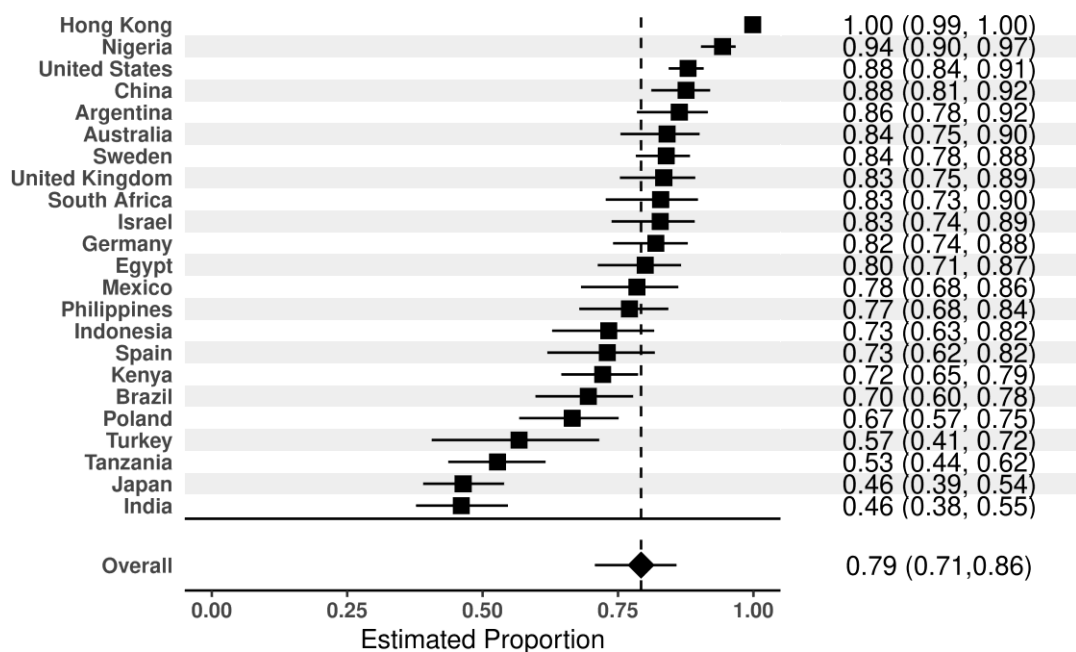

Probability-scale:  $\tau=0.180$ ;  
 Logit-scale:  $\tau=1.093$ ;  $Q(df=22)=407.26$ ,  $p<.001$ ; Q-profile 95% CI [0.566, 1.388];  $I^2=96.97$ ;  
 Plot is based on back transformed bounds after using approximate logit SE that  
 aren't guaranteed to match the robust SE of a proportion.

Figure S17. Forest plot for `Marital status`-`Widowed`

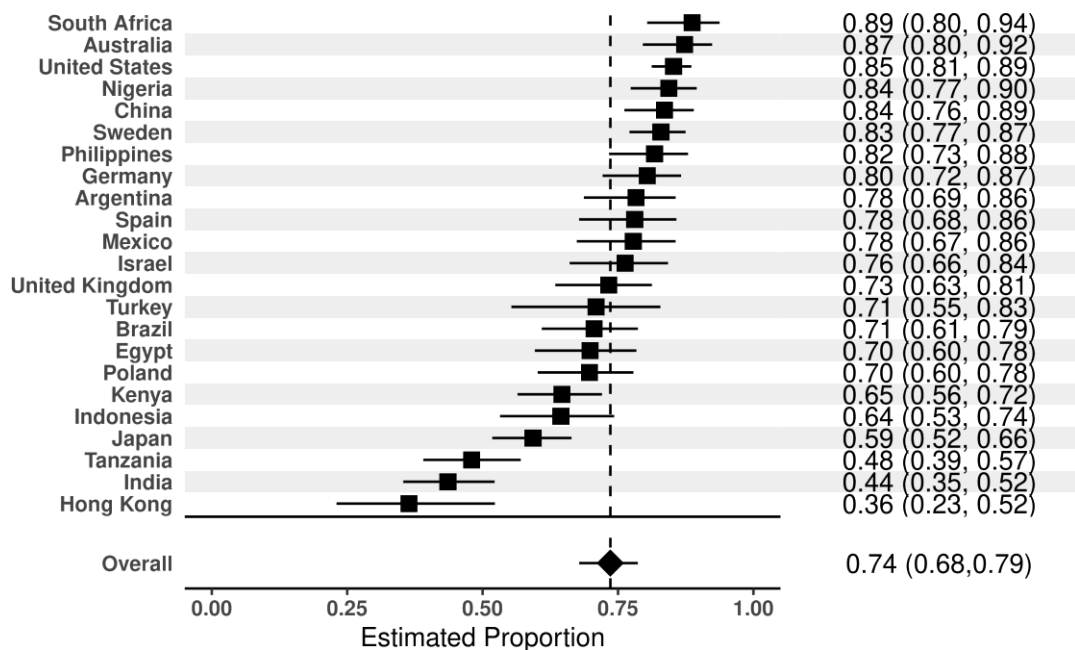

Probability-scale:  $\tau=0.127$ ;  
 Logit-scale:  $\tau=0.652$ ;  $Q(df=22)=299.94$ ,  $p<.001$ ; Q-profile 95% CI [0.468, 0.896];  $I^2=92.39$ ;  
 Plot is based on back transformed bounds after using approximate logit SE that  
 aren't guaranteed to match the robust SE of a proportion.

Figure S18. Forest plot for `Employment status`-`Employed for an employer`

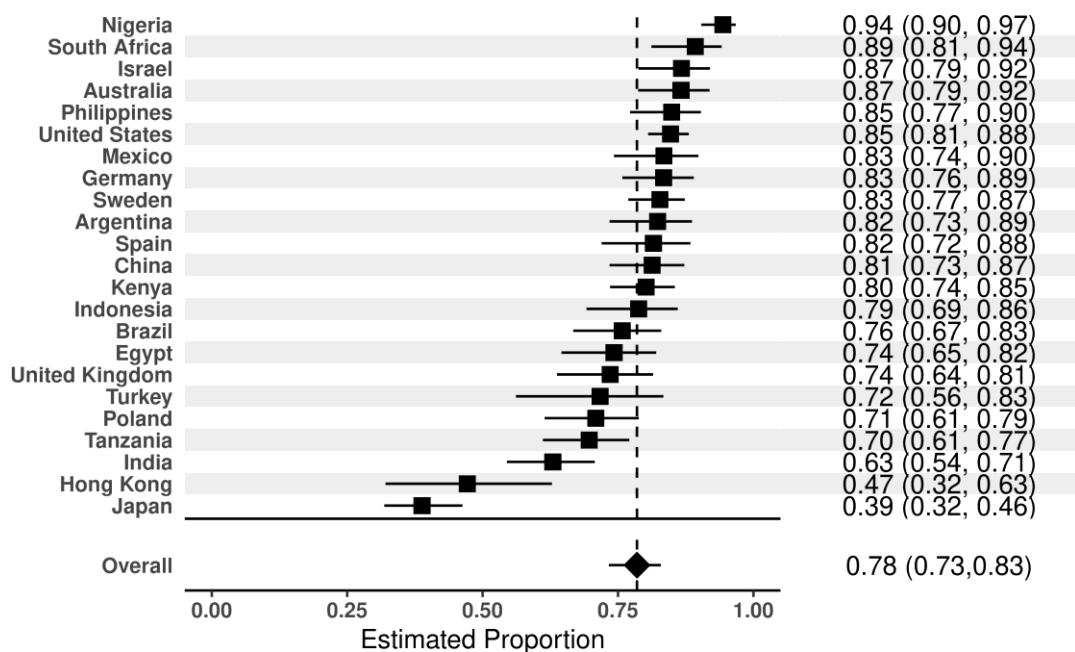

Probability-scale:  $\tau=0.112$ ;  
 Logit-scale:  $\tau=0.664$ ;  $Q(df=22)=320.58$ ,  $p<.001$ ; Q-profile 95% CI [0.479, 0.915];  $I^2=92.22$ ;  
 Plot is based on back transformed bounds after using approximate logit SE that  
 aren't guaranteed to match the robust SE of a proportion.

Figure S19. Forest plot for `Employment status`-`Homemaker`

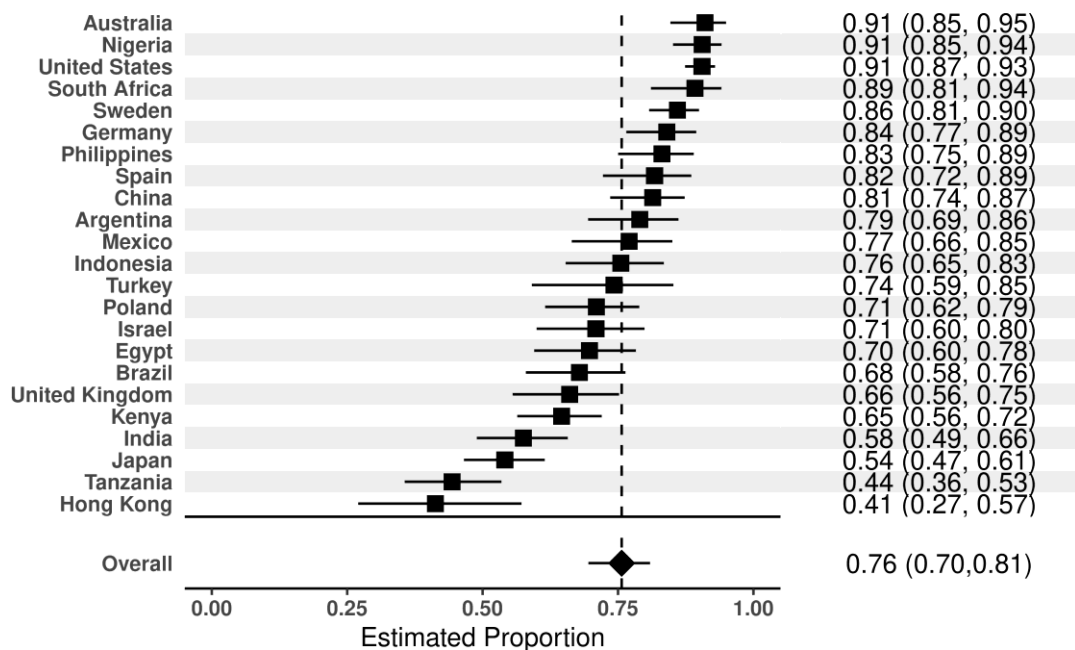

Probability-scale:  $\tau=0.134$ ;  
 Logit-scale:  $\tau=0.729$ ;  $Q(df=22)=372.13$ ,  $p<.001$ ; Q-profile 95% CI [0.530, 1.000];  $I^2=93.61$ ;  
 Plot is based on back transformed bounds after using approximate logit SE that aren't guaranteed to match the robust SE of a proportion.

Figure S20. Forest plot for `Employment status`-`None of these/other`

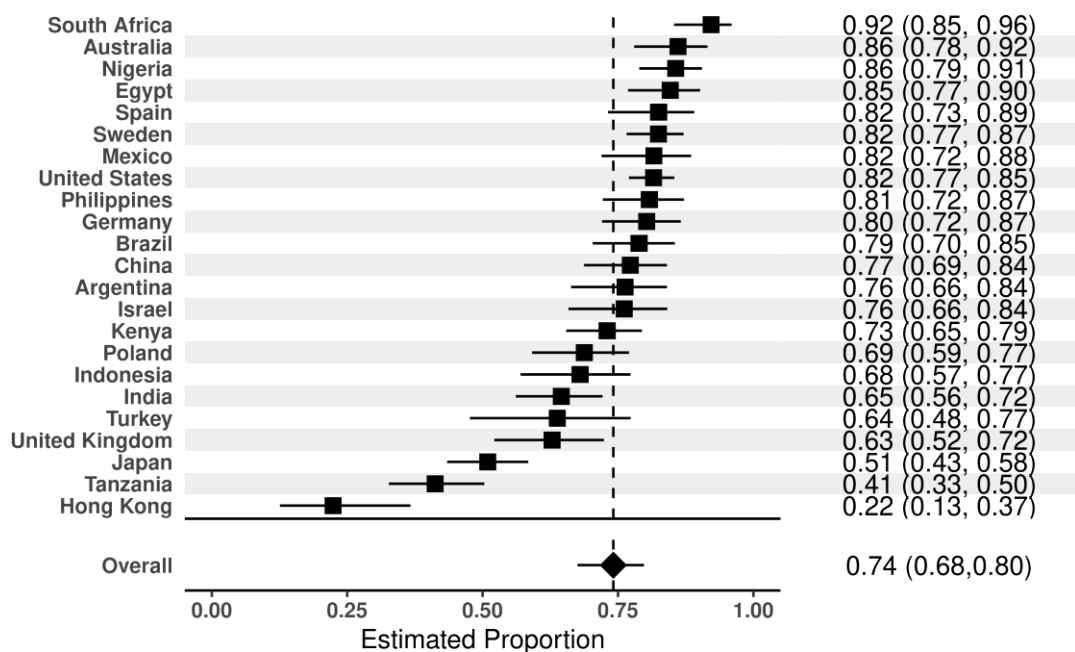

Probability-scale:  $\tau=0.145$ ;  
 Logit-scale:  $\tau=0.757$ ;  $Q(df=22)=315.06$ ,  $p<.001$ ; Q-profile 95% CI [0.535, 1.030];  $I^2=94.18$ ;  
 Plot is based on back transformed bounds after using approximate logit SE that aren't guaranteed to match the robust SE of a proportion.

Figure S21. Forest plot for `Employment status`-`Retired`

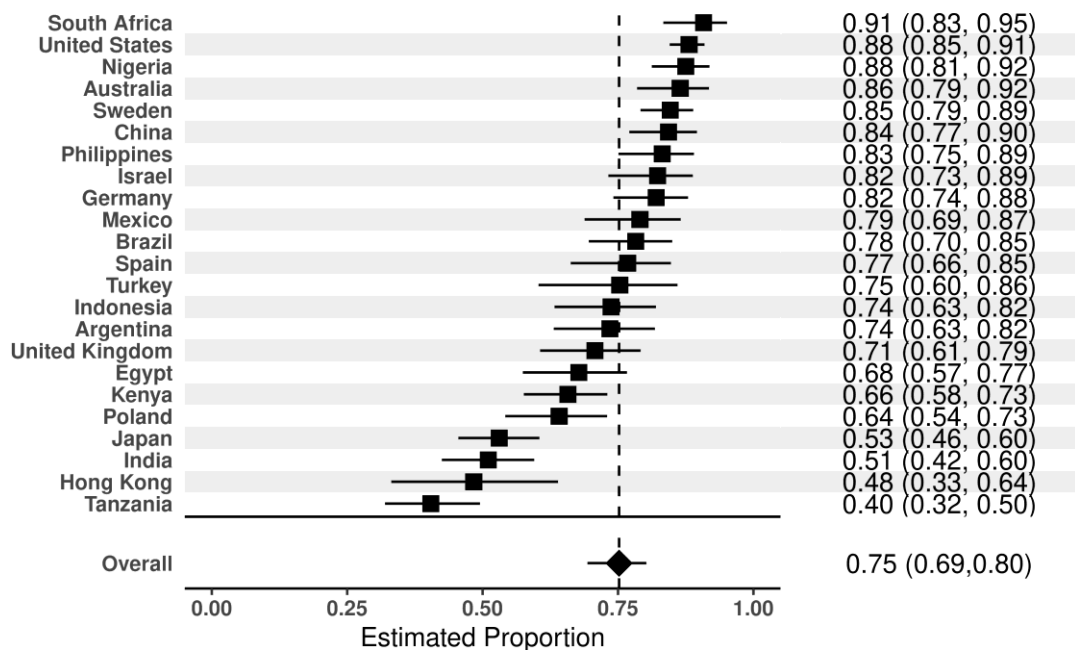

Probability-scale:  $\tau=0.128$ ;  
 Logit-scale:  $\tau=0.685$ ;  $Q(df=22)=358.77$ ,  $p<.001$ ; Q-profile 95% CI [0.500, 0.944];  $I^2=92.91$ ;  
 Plot is based on back transformed bounds after using approximate logit SE that aren't guaranteed to match the robust SE of a proportion.

Figure S22. Forest plot for `Employment status`-`Self-employed`

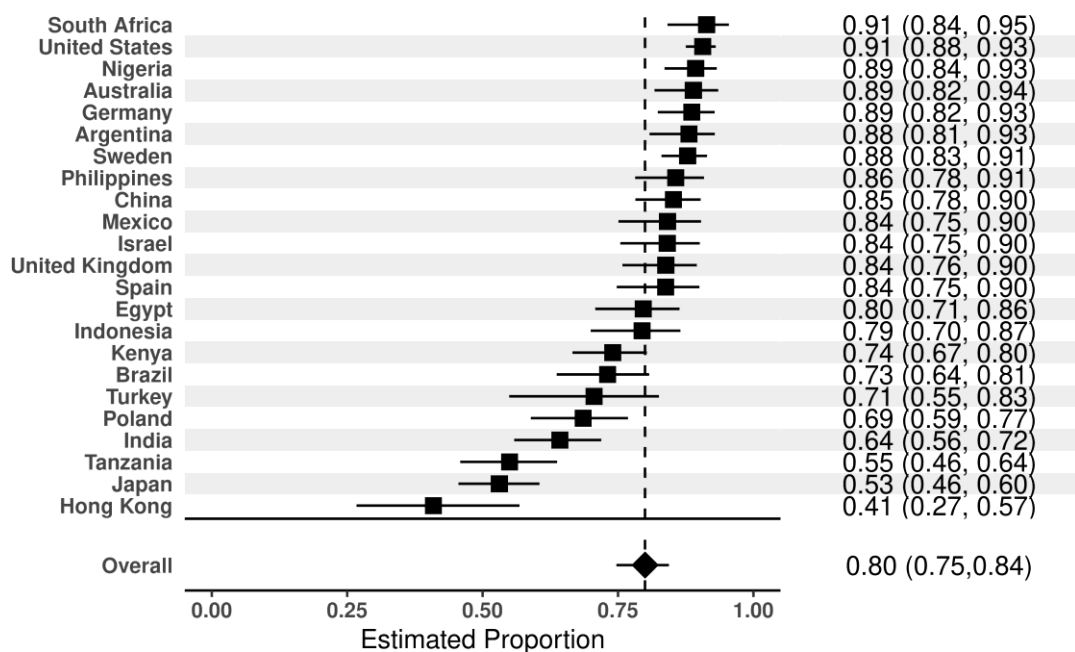

Probability-scale:  $\tau=0.114$ ;  
 Logit-scale:  $\tau=0.710$ ;  $Q(df=22)=345.60$ ,  $p<.001$ ; Q-profile 95% CI [0.514, 0.976];  $I^2=92.90$ ;  
 Plot is based on back transformed bounds after using approximate logit SE that aren't guaranteed to match the robust SE of a proportion.

Figure S23. Forest plot for `Employment status`-`Student`

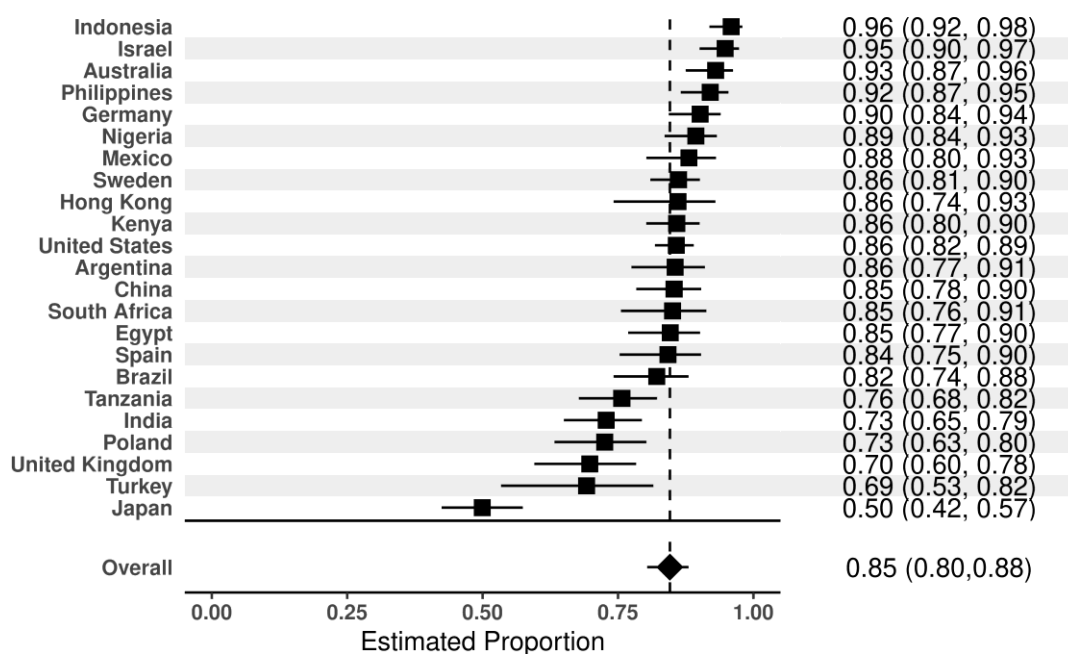

Probability-scale:  $\tau=0.088$ ;  
 Logit-scale:  $\tau=0.678$ ;  $Q(df=22)=294.12$ ,  $p<.001$ ;  $Q$ -profile 95% CI [0.486, 0.936];  $I^2=91.81$ ;  
 Plot is based on back transformed bounds after using approximate logit SE that aren't guaranteed to match the robust SE of a proportion.

Figure S24. Forest plot for `Employment status`-`Unemployed and looking for a job`

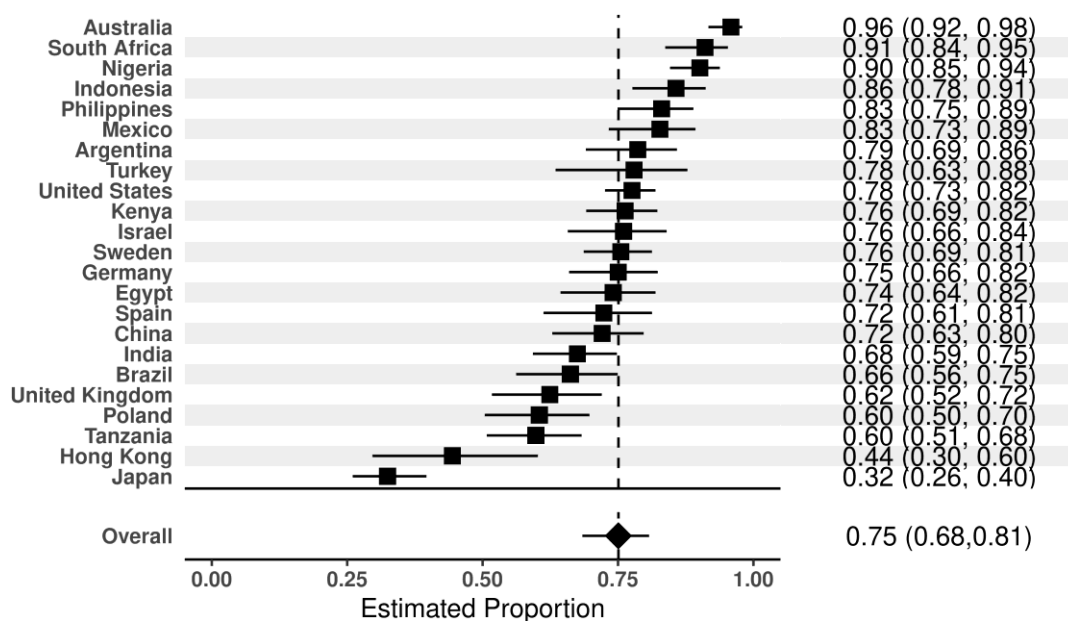

Probability-scale:  $\tau=0.146$ ;  
 Logit-scale:  $\tau=0.779$ ;  $Q(df=22)=351.74$ ,  $p<.001$ ;  $Q$ -profile 95% CI [0.556, 1.061];  $I^2=94.51$ ;  
 Plot is based on back transformed bounds after using approximate logit SE that aren't guaranteed to match the robust SE of a proportion.

Figure S25. Forest plot for `Religious service attendance` - `Never`

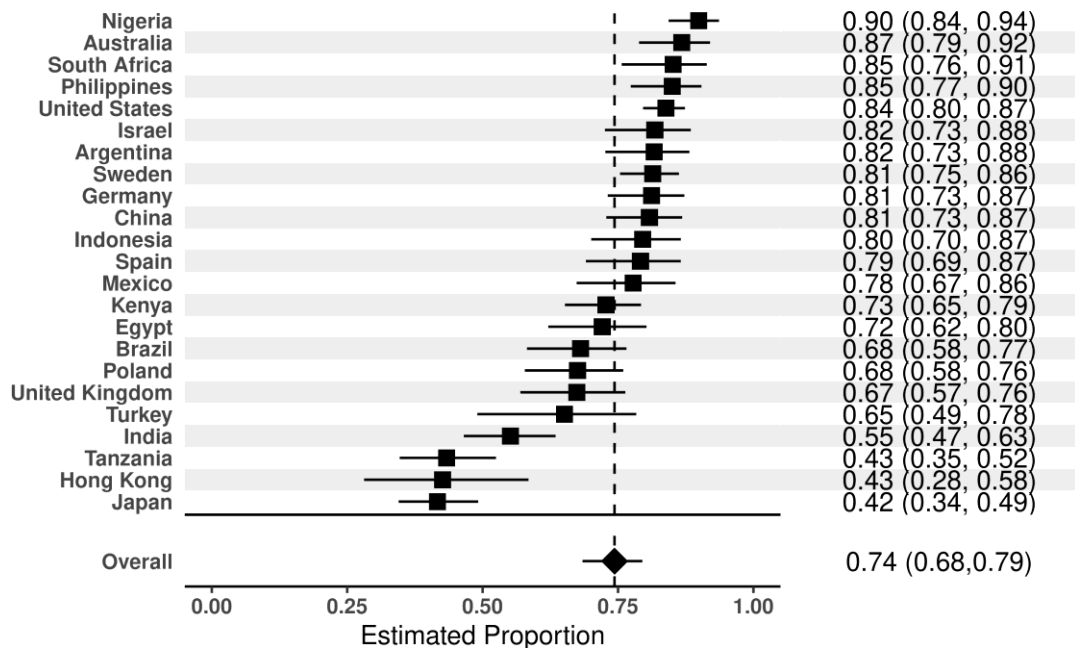

Probability-scale:  $\tau=0.130$ ;  
 Logit-scale:  $\tau=0.680$ ;  $Q(df=22)=352.00$ ,  $p<.001$ ; Q-profile 95% CI [0.495, 0.936];  $I^2=92.89$ ;  
 Plot is based on back transformed bounds after using approximate logit SE that aren't guaranteed to match the robust SE of a proportion.

Figure S26. Forest plot for `Religious service attendance` - `A few times a year`

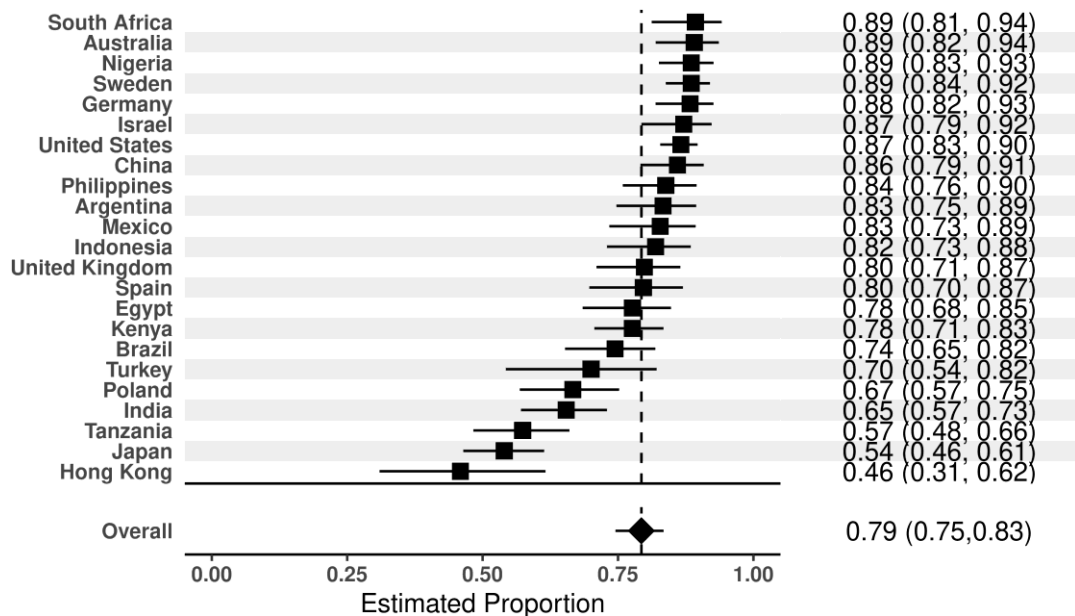

Probability-scale:  $\tau=0.103$ ;  
 Logit-scale:  $\tau=0.628$ ;  $Q(df=22)=277.57$ ,  $p<.001$ ; Q-profile 95% CI [0.451, 0.868];  $I^2=91.28$ ;  
 Plot is based on back transformed bounds after using approximate logit SE that aren't guaranteed to match the robust SE of a proportion.

Figure S27. Forest plot for `Religious service attendance` - `>1/week`

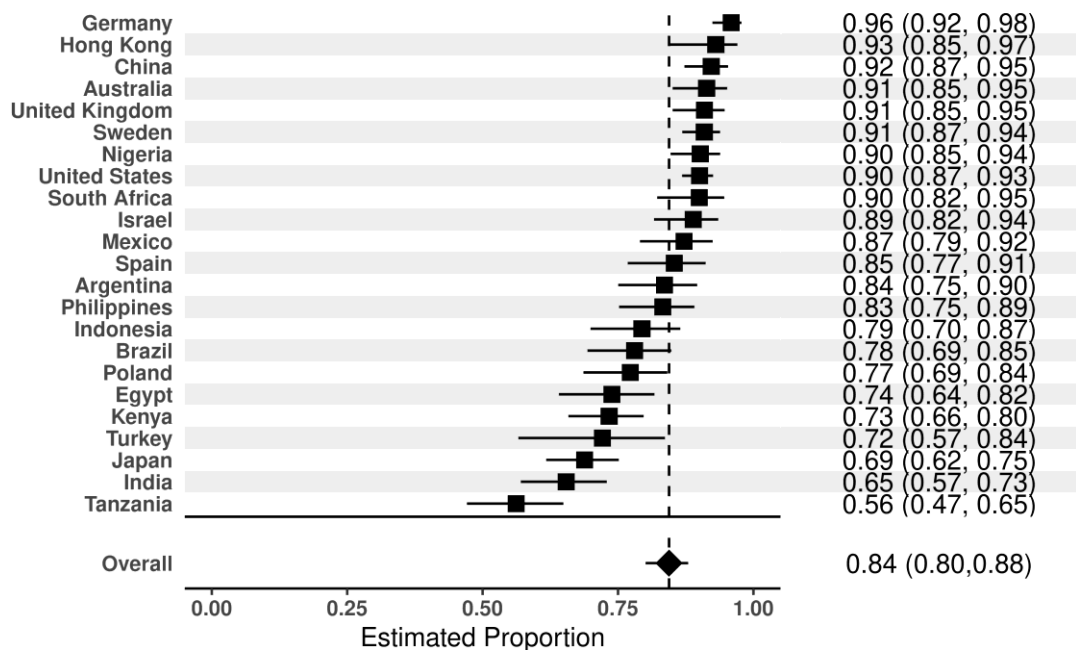

Probability-scale:  $\tau=0.091$ ;  
 Logit-scale:  $\tau=0.694$ ;  $Q(df=22)=299.52$ ,  $p<.001$ ; Q-profile 95% CI [0.502, 0.958];  $I^2=92.13$ ;  
 Plot is based on back transformed bounds after using approximate logit SE that aren't guaranteed to match the robust SE of a proportion.

Figure S28. Forest plot for `Religious service attendance` - `1/week`

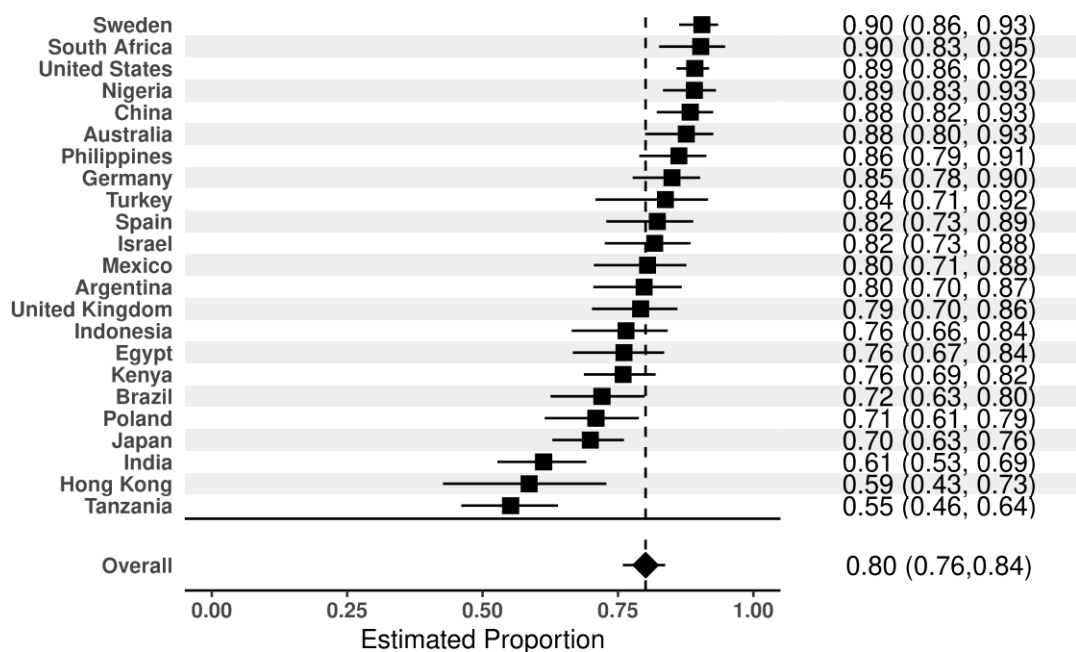

Probability-scale:  $\tau=0.090$ ;  
 Logit-scale:  $\tau=0.562$ ;  $Q(df=22)=233.97$ ,  $p<.001$ ; Q-profile 95% CI [0.405, 0.784];  $I^2=89.23$ ;  
 Plot is based on back transformed bounds after using approximate logit SE that aren't guaranteed to match the robust SE of a proportion.

Figure S29. Forest plot for `Religious service attendance` - `1-3/month`

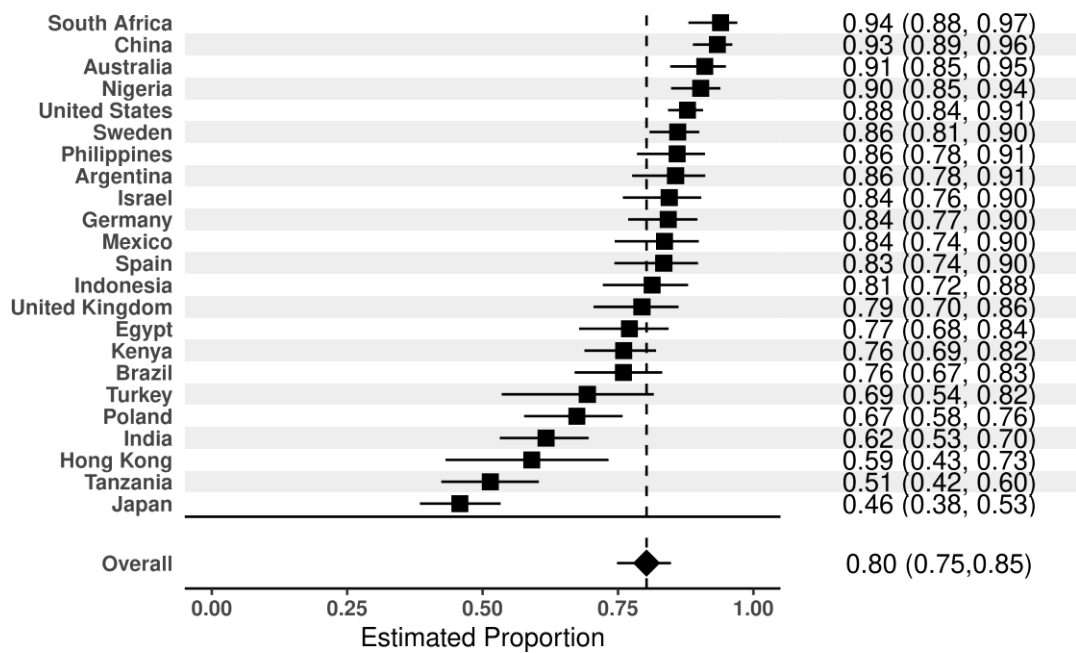

Probability-scale:  $\tau=0.117$ ;  
 Logit-scale:  $\tau=0.740$ ;  $Q(df=22)=382.25$ ,  $p<.001$ ; Q-profile 95% CI [0.538, 1.016];  $I^2=93.45$ ;  
 Plot is based on back transformed bounds after using approximate logit SE that aren't guaranteed to match the robust SE of a proportion.

Figure S30. Forest plot for `Education` - `9-15 years`

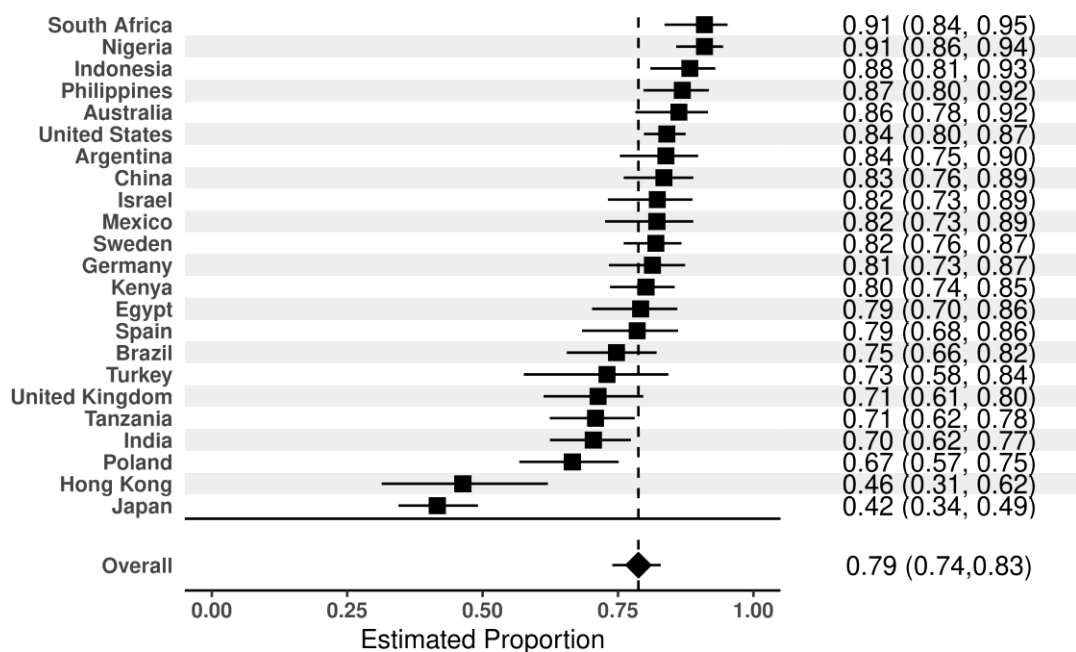

Probability-scale:  $\tau=0.104$ ;  
 Logit-scale:  $\tau=0.621$ ;  $Q(df=22)=281.33$ ,  $p<.001$ ; Q-profile 95% CI [0.445, 0.858];  $I^2=91.20$ ;  
 Plot is based on back transformed bounds after using approximate logit SE that aren't guaranteed to match the robust SE of a proportion.

Figure S31. Forest plot for `Education`-`16+ years`

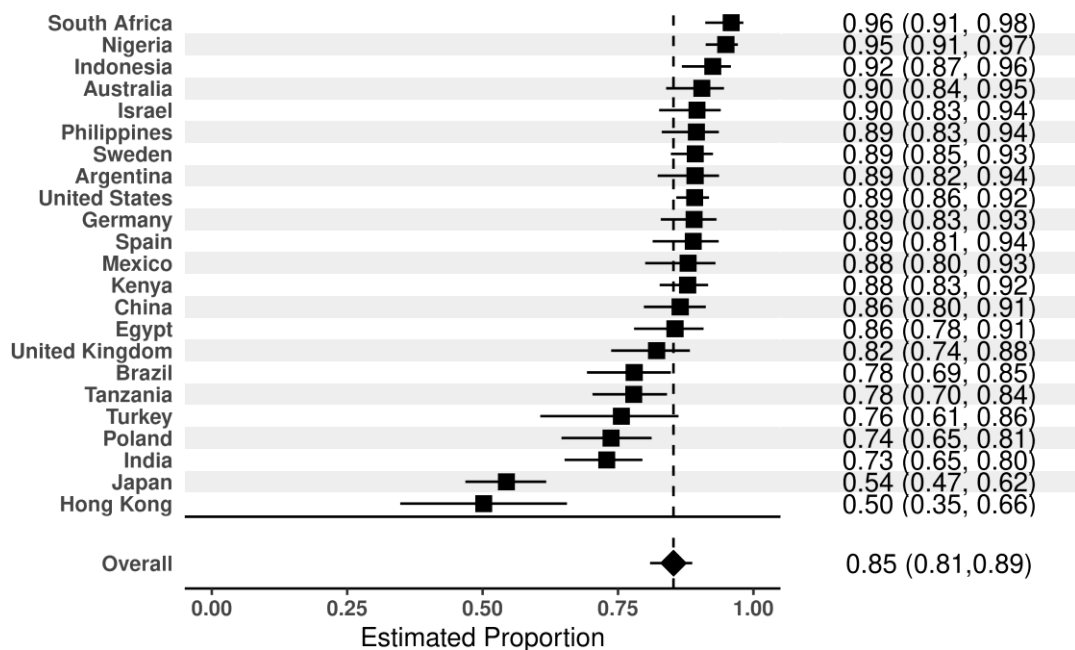

Probability-scale:  $\tau=0.091$ ;  
 Logit-scale:  $\tau=0.720$ ;  $Q(df=22)=304.87$ ,  $p<.001$ ; Q-profile 95% CI [0.513, 0.989];  $I^2=92.43$ ;  
 Plot is based on back transformed bounds after using approximate logit SE that aren't guaranteed to match the robust SE of a proportion.

Figure S32. Forest plot for `Education`-`Up to 8 years`

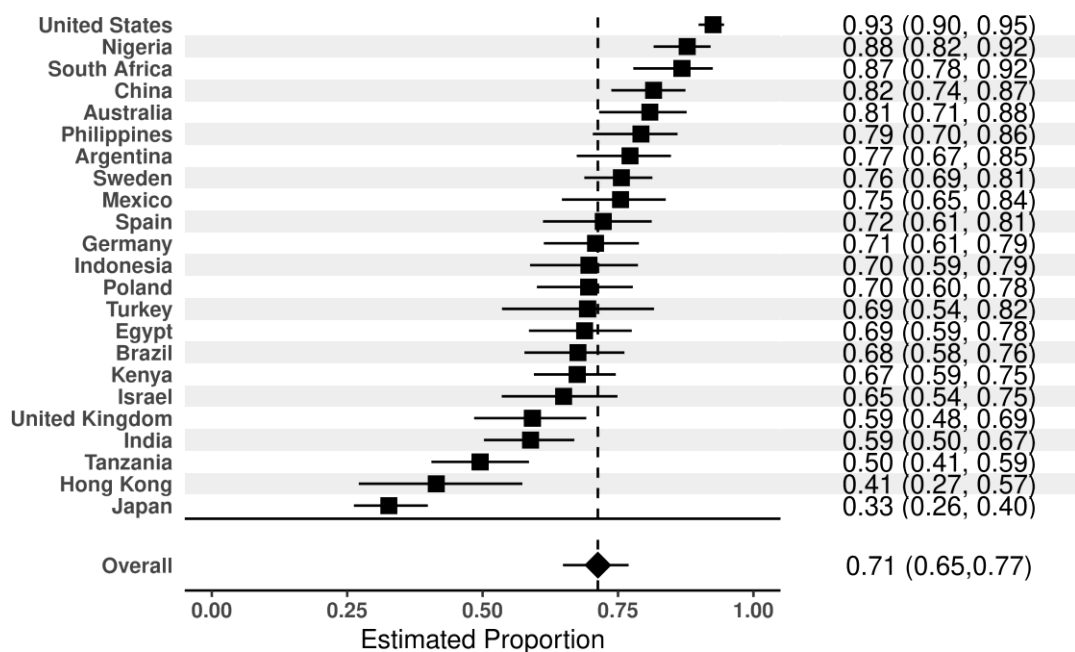

Probability-scale:  $\tau=0.143$ ;  
 Logit-scale:  $\tau=0.699$ ;  $Q(df=22)=412.37$ ,  $p<.001$ ; Q-profile 95% CI [0.513, 0.961];  $I^2=93.34$ ;  
 Plot is based on back transformed bounds after using approximate logit SE that aren't guaranteed to match the robust SE of a proportion.

Figure S33. Forest plot for 'Immigration status' - 'Born in this country'

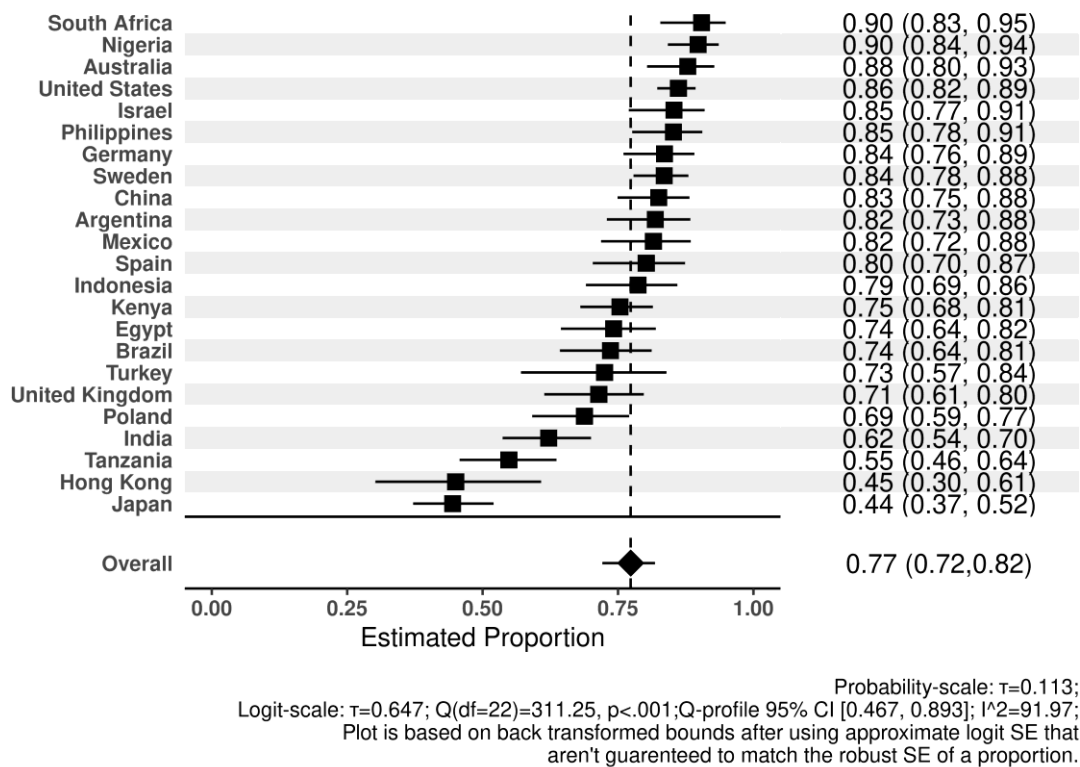

Figure S34. Forest plot for 'Immigration status' - 'Born in another country'

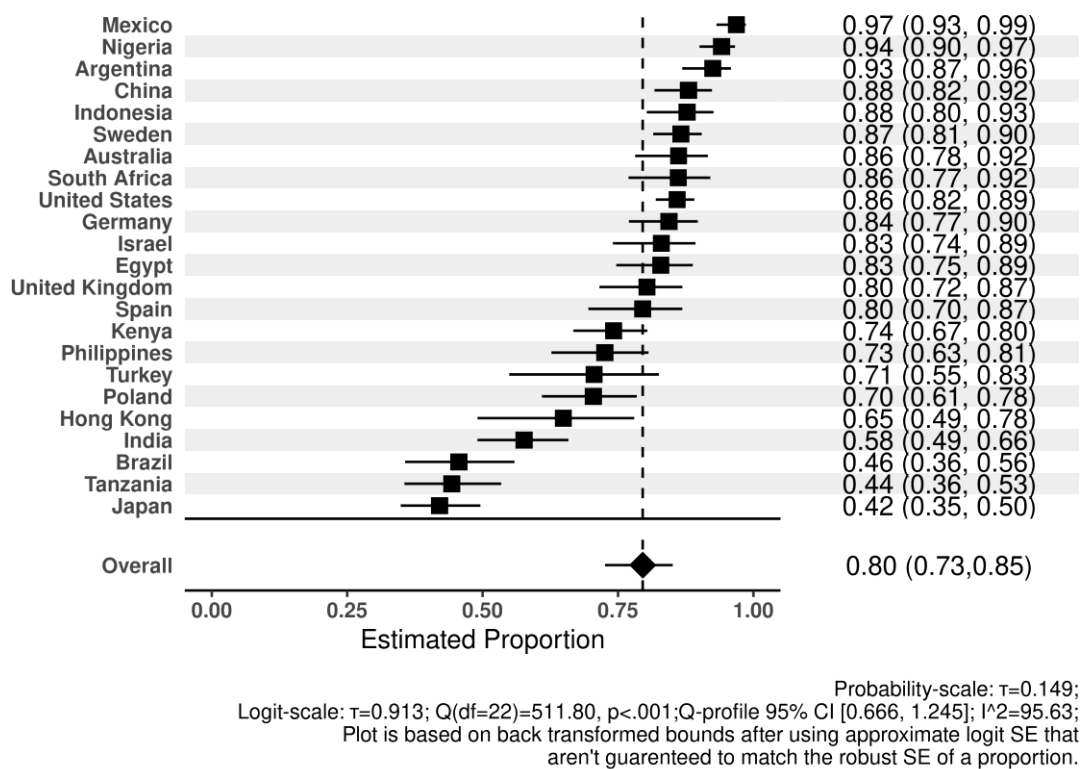

Pairwise differences forest plots

Figure S35. Forest plot for `Age group`-`(Ref: 1998-2005 (current age: 18-24 years)) 80 or older`

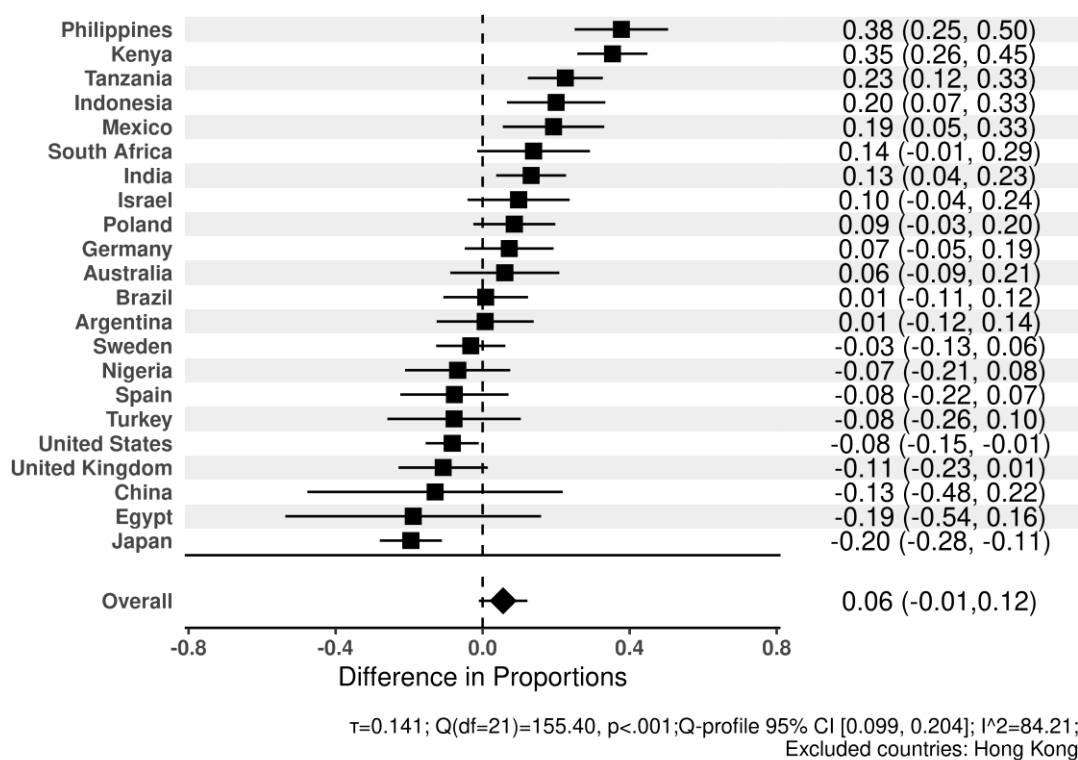

Figure S36. Forest plot for `Age group`-`(Ref: 1998-2005 (current age: 18-24 years)) 1943-1953 (current age: 70-79 years)`

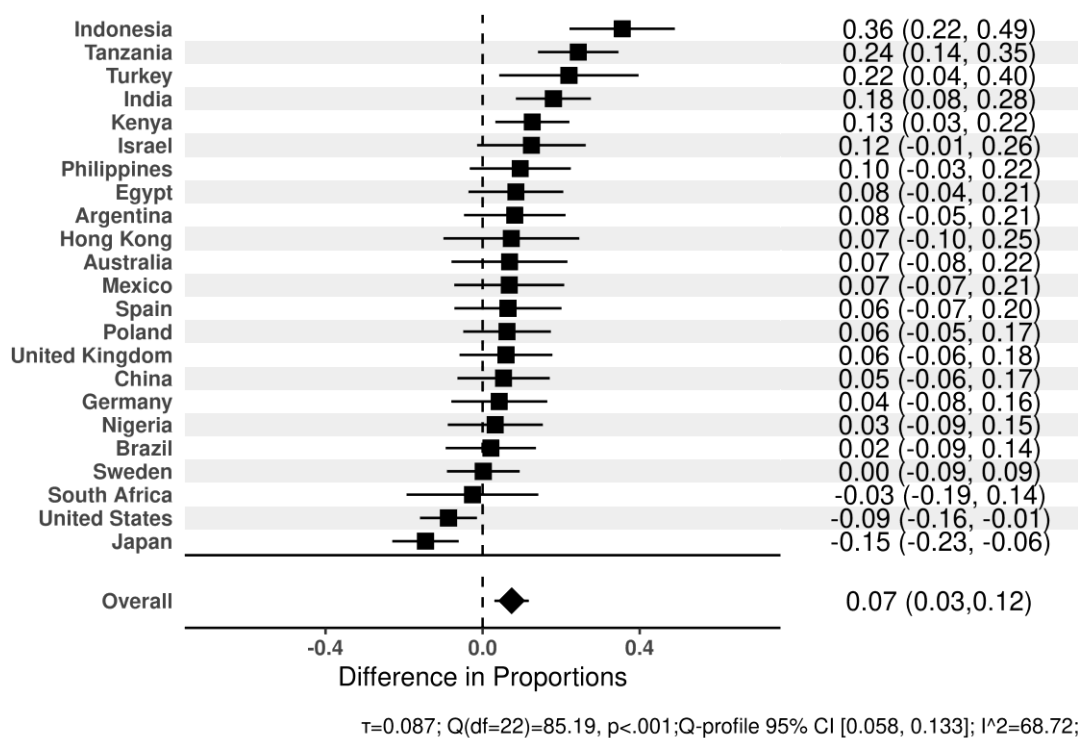

Figure S37. Forest plot for `Age group`-`(Ref: 1998-2005 (current age: 18-24 years)) 1953-1963 (current age: 60-69 years)`

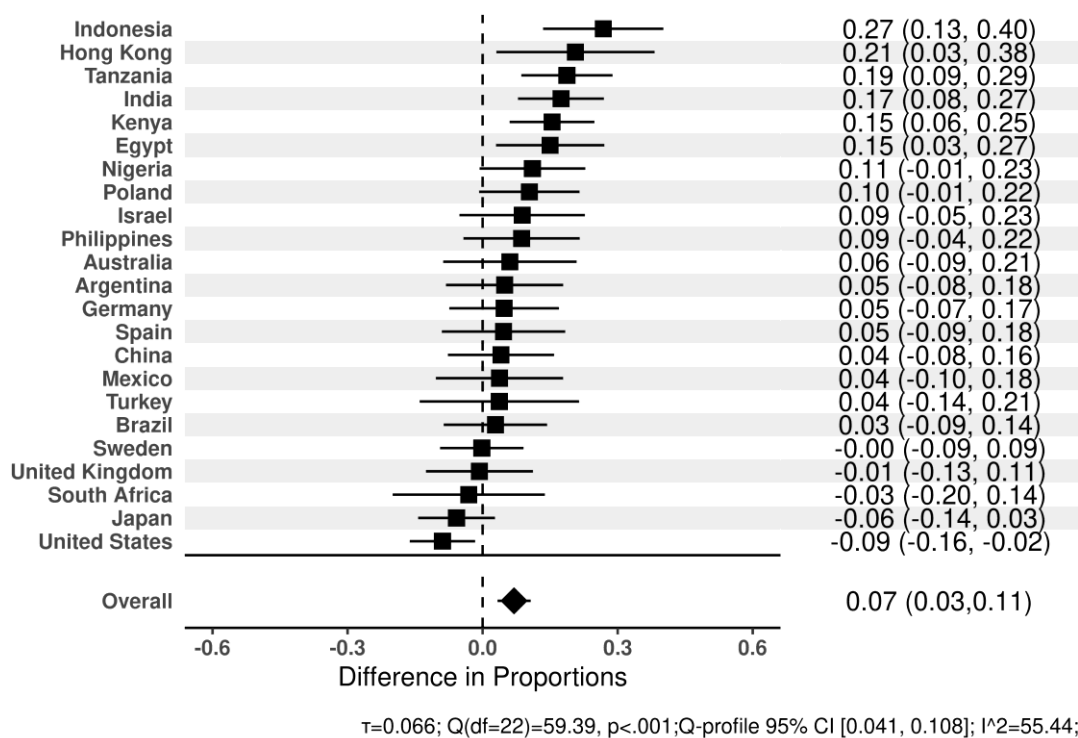

Figure S38. Forest plot for `Age group`-`(Ref: 1998-2005 (current age: 18-24 years)) 1963-1973 (current age: 50-59 years)`

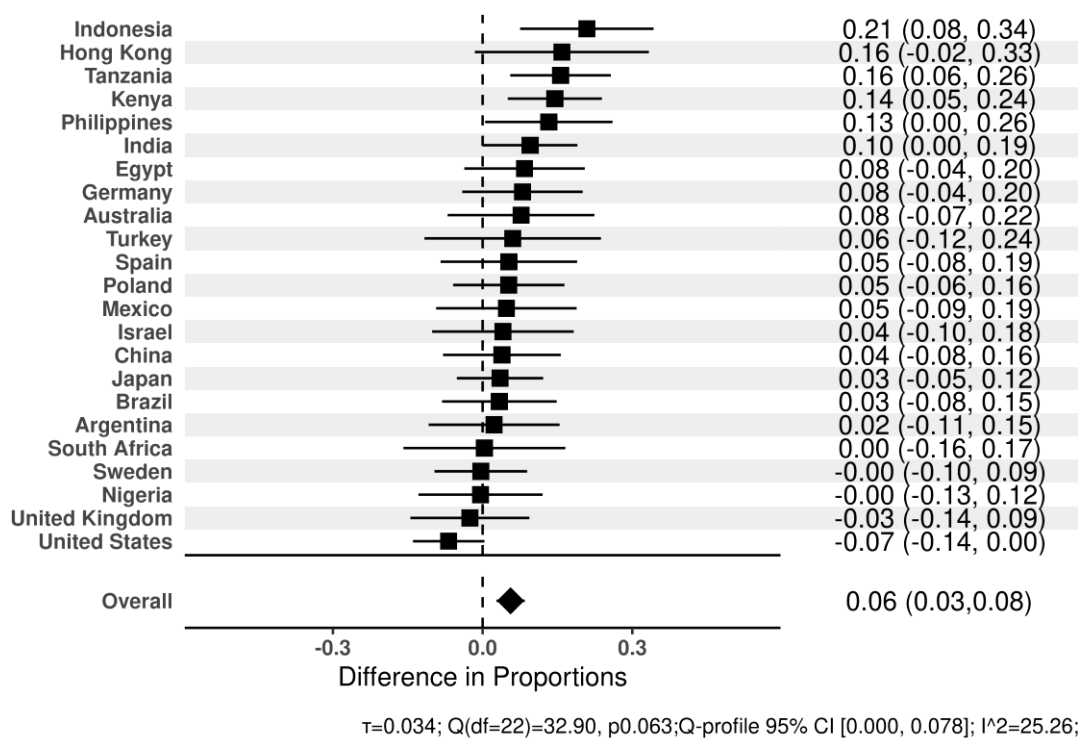

Figure S39. Forest plot for `Age group`-`(Ref: 1998-2005 (current age: 18-24 years)) 1973-1983 (current age: 40-49 years)`

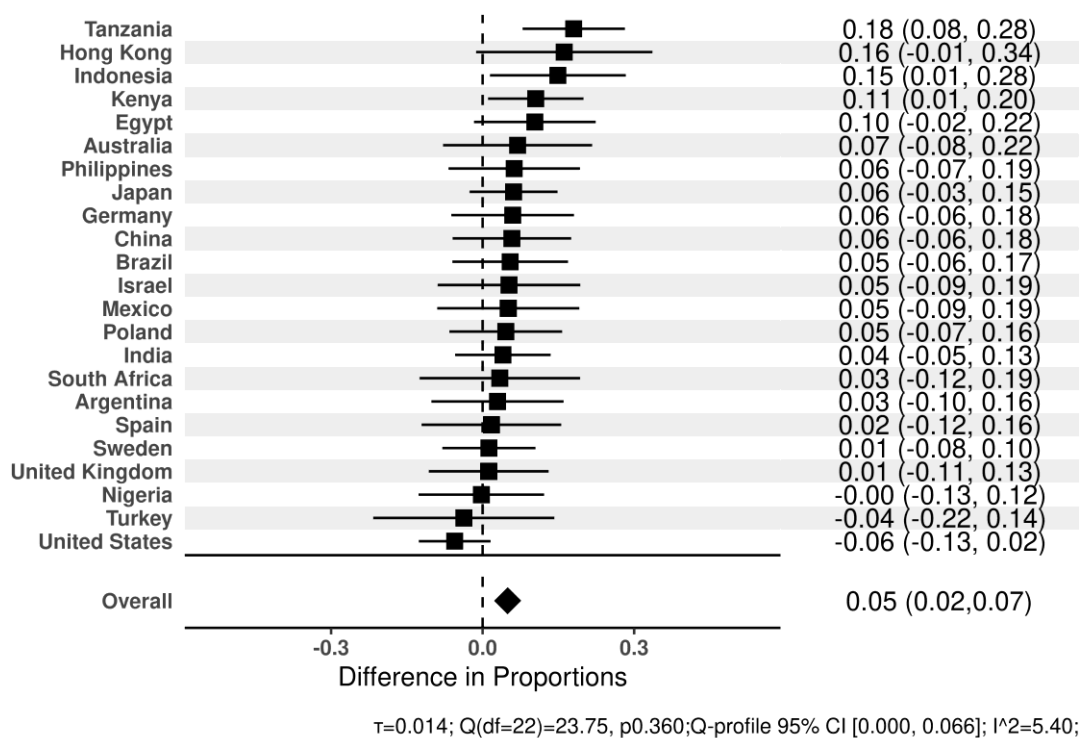

Figure S40. Forest plot for `Age group`-`(Ref: 1998-2005 (current age: 18-24 years)) 1983-1993 (current age: 30-39 years)`

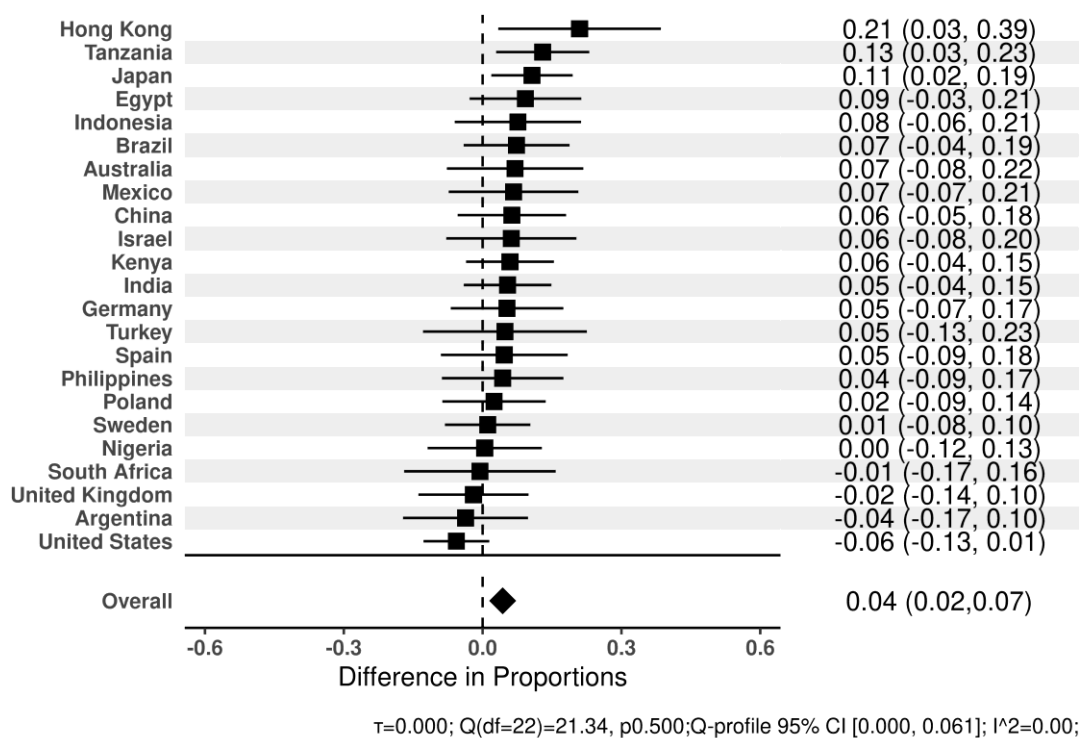

Figure S41. Forest plot for `Age group`-`(Ref: 1998-2005 (current age: 18-24 years)) 1993-1998 (current age: 25-29 years)`

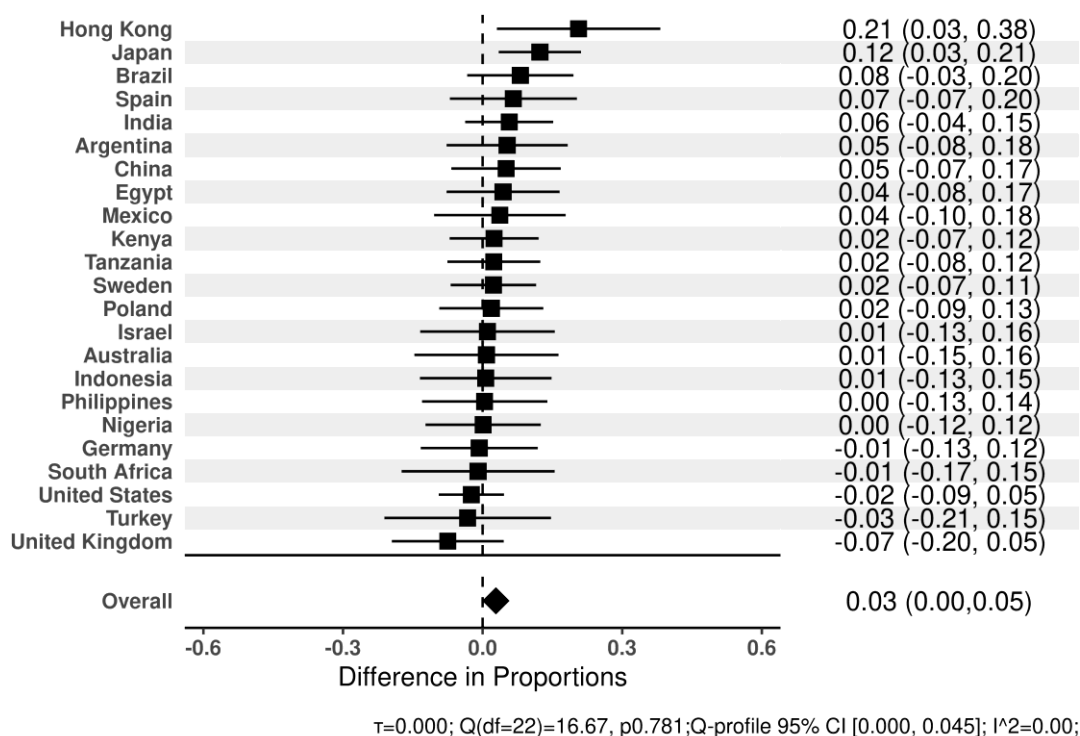

Figure S42. Forest plot for `Age group`-`(Ref: 80 or older) 1943-1953 (current age: 70-79 years)`

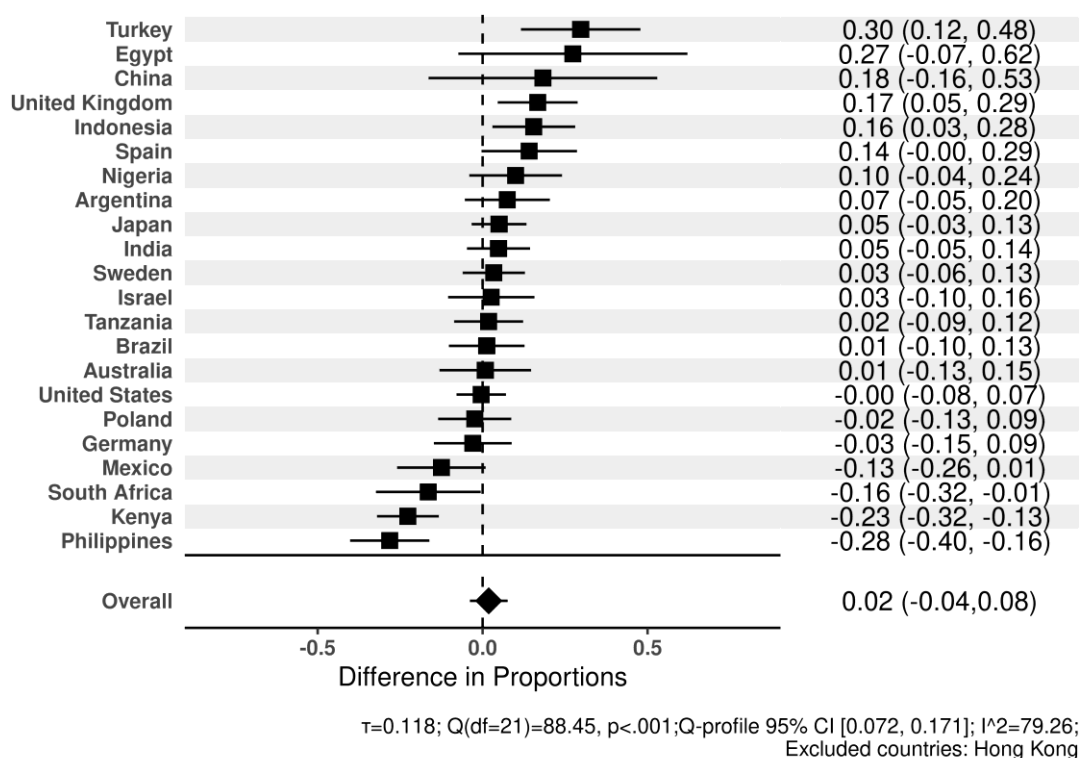

Figure S43. Forest plot for `Age group` - `(Ref: 80 or older) 1953-1963`  
(current age: 60-69 years)

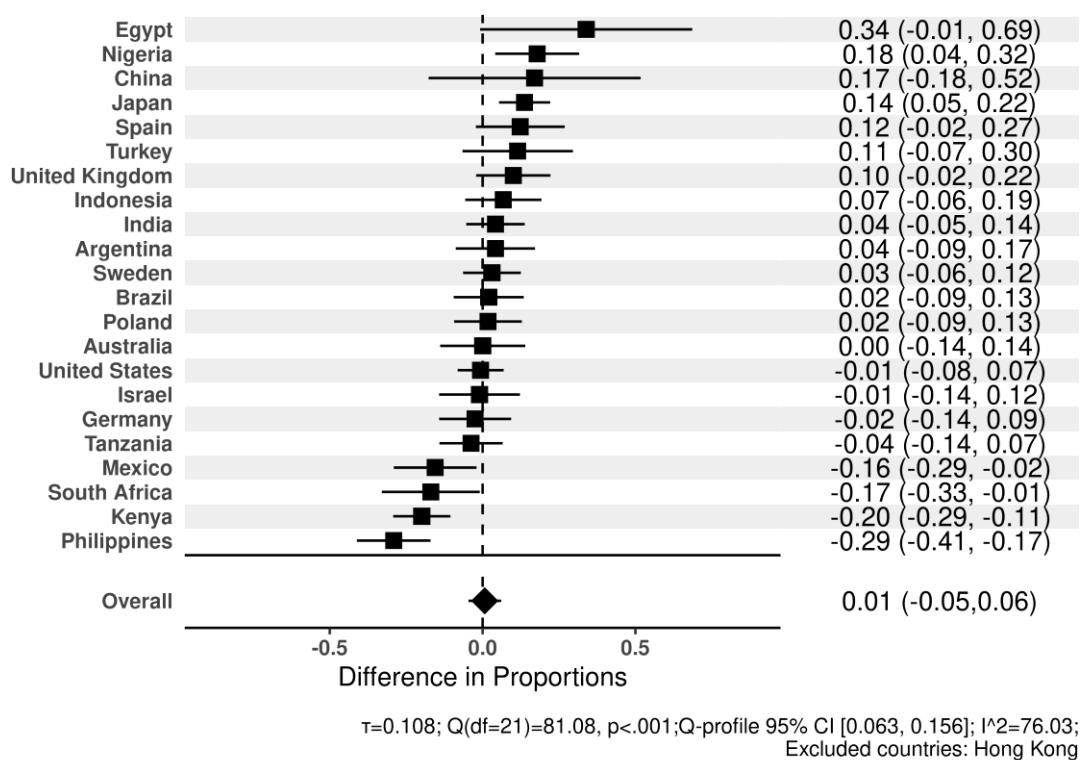

Figure S44. Forest plot for `Age group` - `(Ref: 80 or older) 1963-1973`  
(current age: 50-59 years)

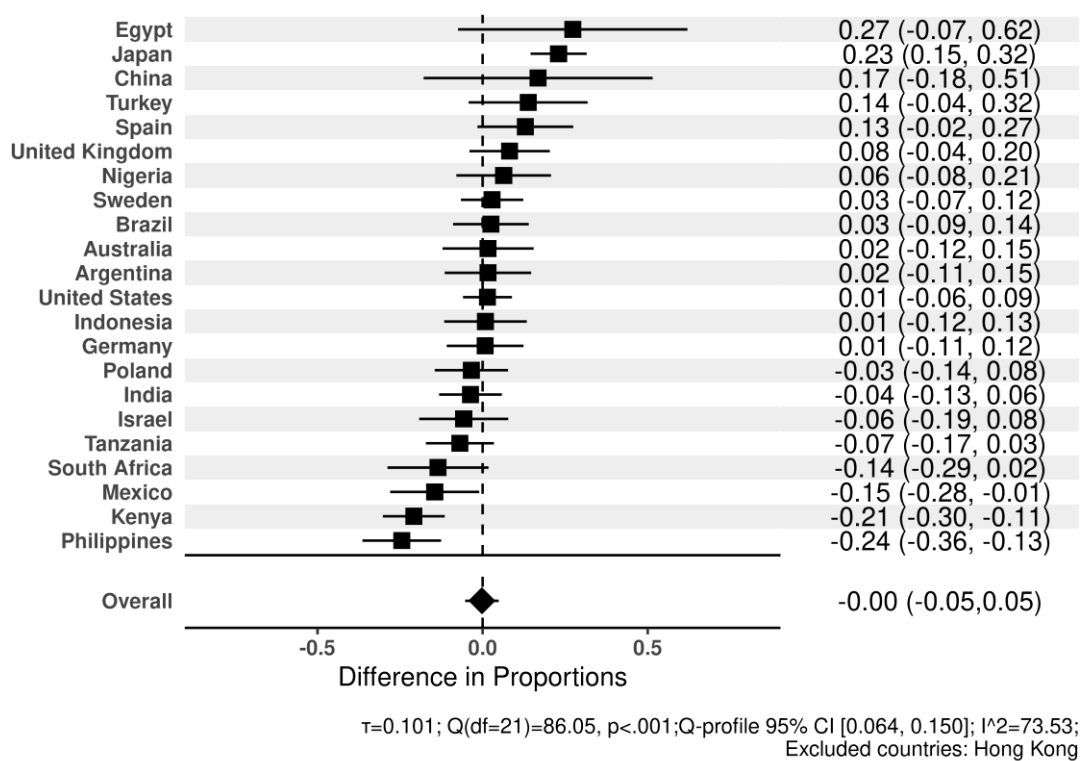

Figure S45. Forest plot for `Age group`-`(Ref: 80 or older) 1973-1983  
(current age: 40-49 years)`

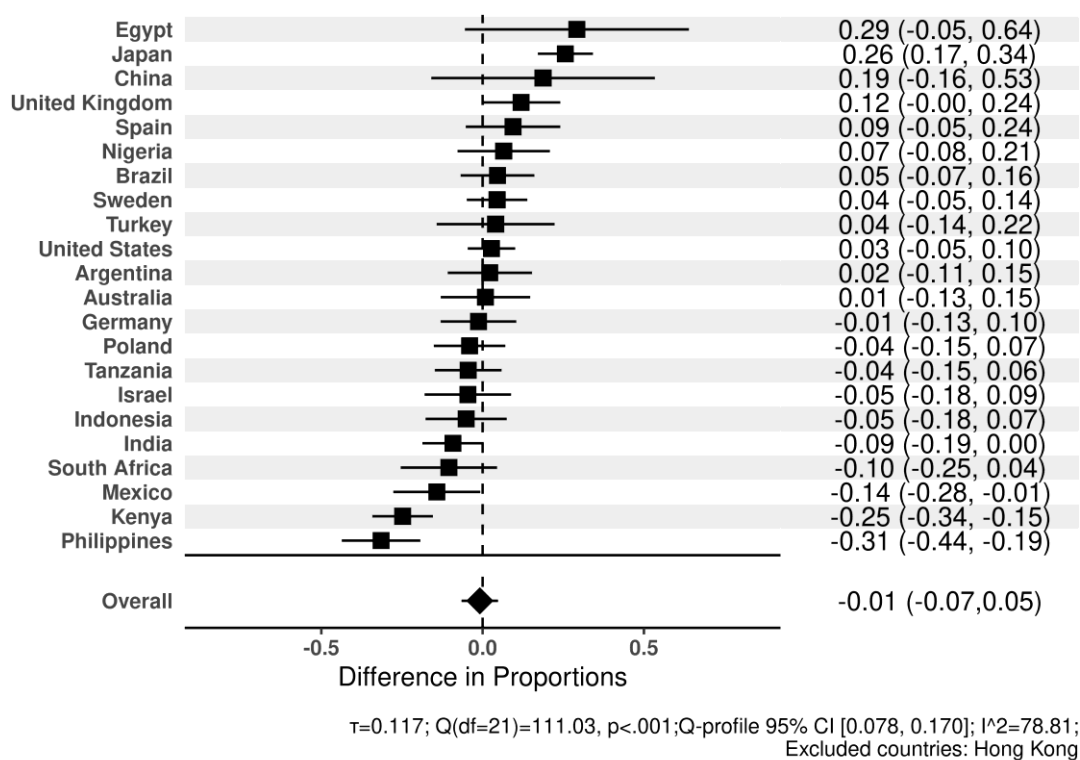

Figure S46. Forest plot for `Age group`-`(Ref: 80 or older) 1983-1993  
(current age: 30-39 years)`

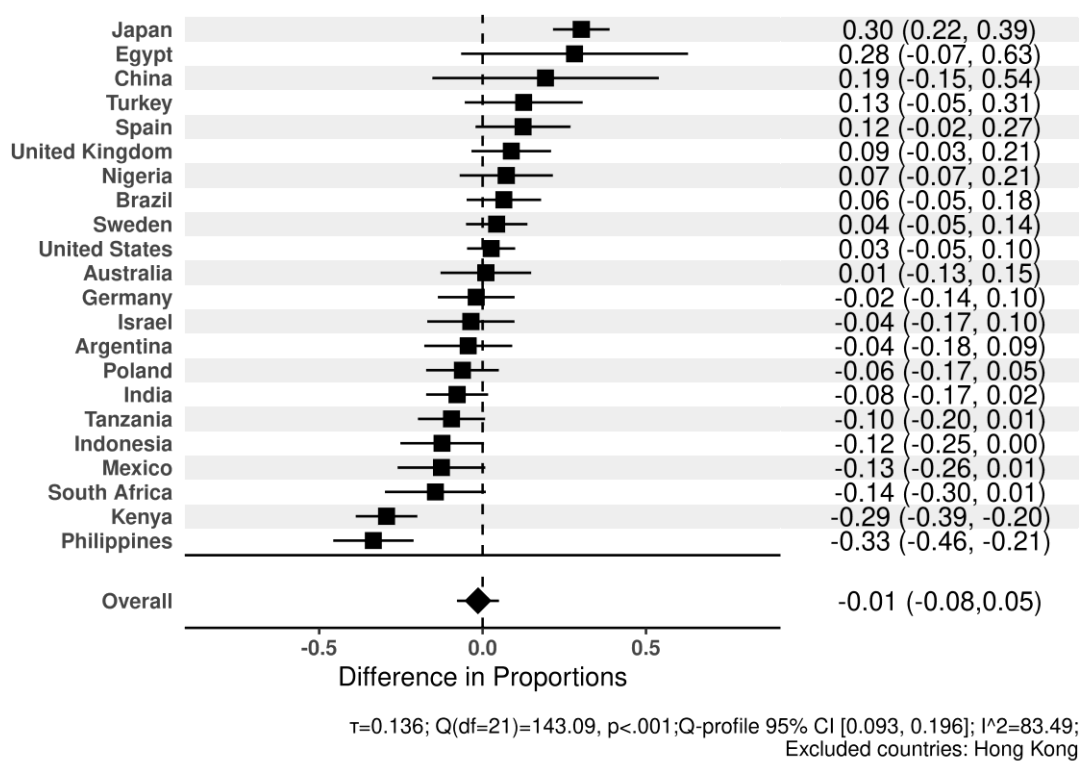

Figure S47. Forest plot for `Age group`-`(Ref: 80 or older) 1993-1998  
(current age: 25-29 years)`

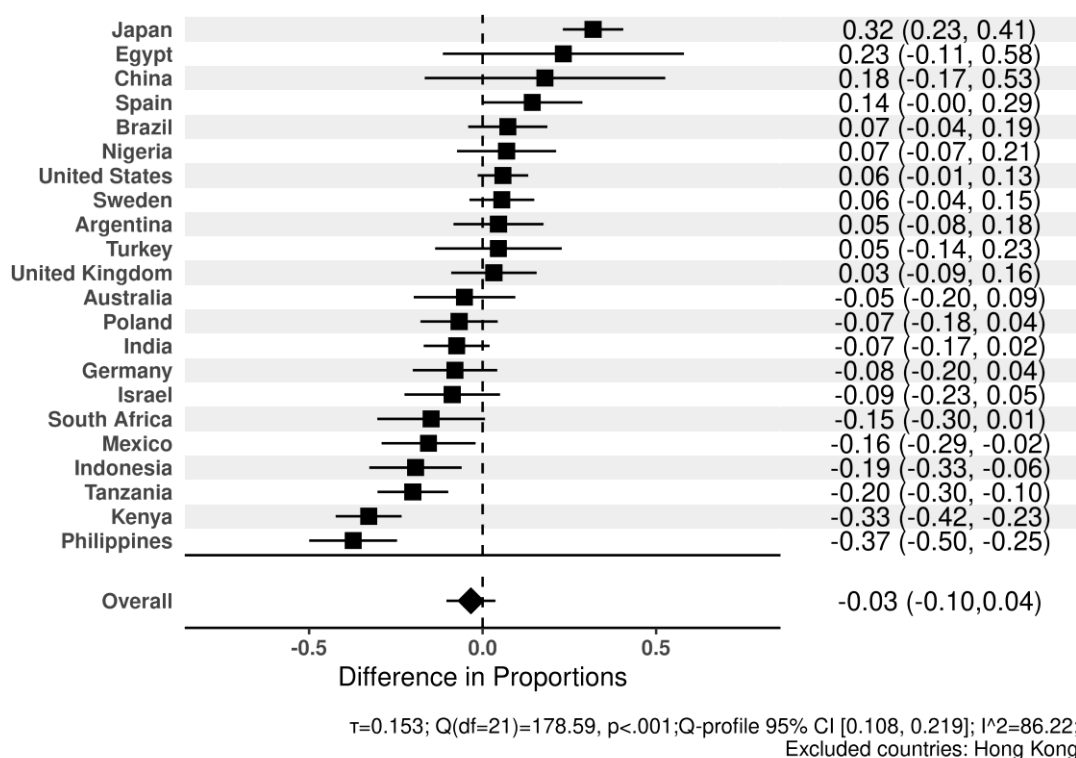

Figure S48. Forest plot for `Age group`-`(Ref: 1943-1953 (current age: 70-79 years)) 1953-1963 (current age: 60-69 years)`

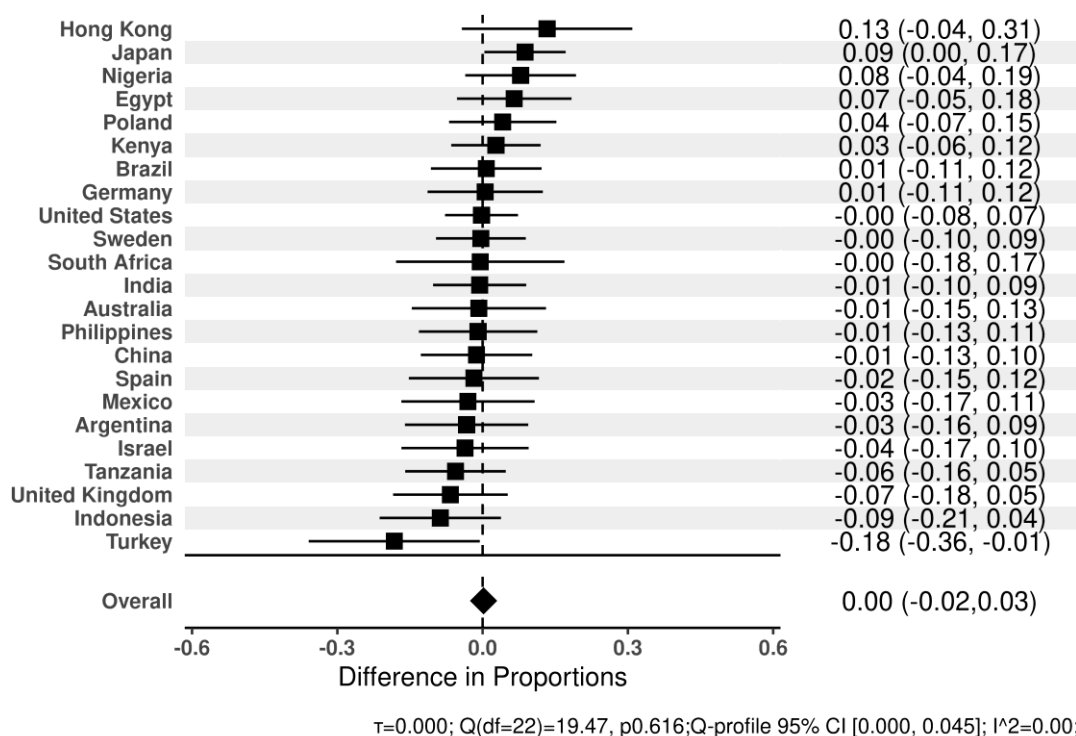

Figure S49. Forest plot for `Age group`-`(Ref: 1943-1953 (current age: 70-79 years)) 1963-1973 (current age: 50-59 years)`

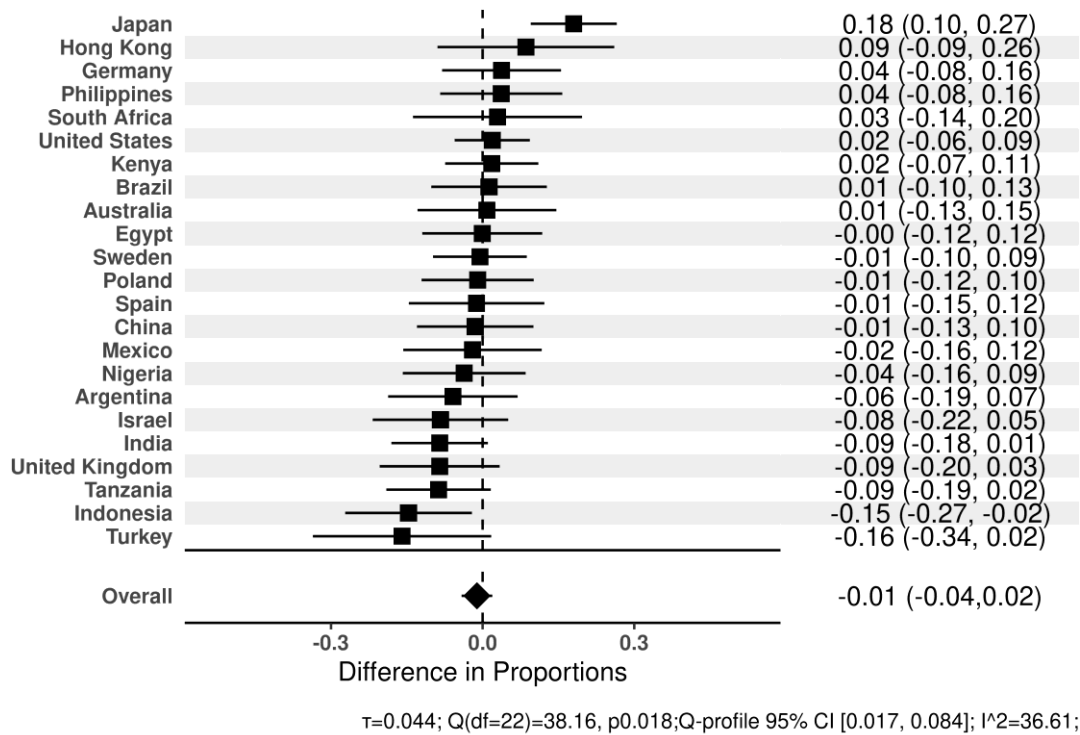

Figure S50. Forest plot for `Age group`-`(Ref: 1943-1953 (current age: 70-79 years)) 1973-1983 (current age: 40-49 years)`

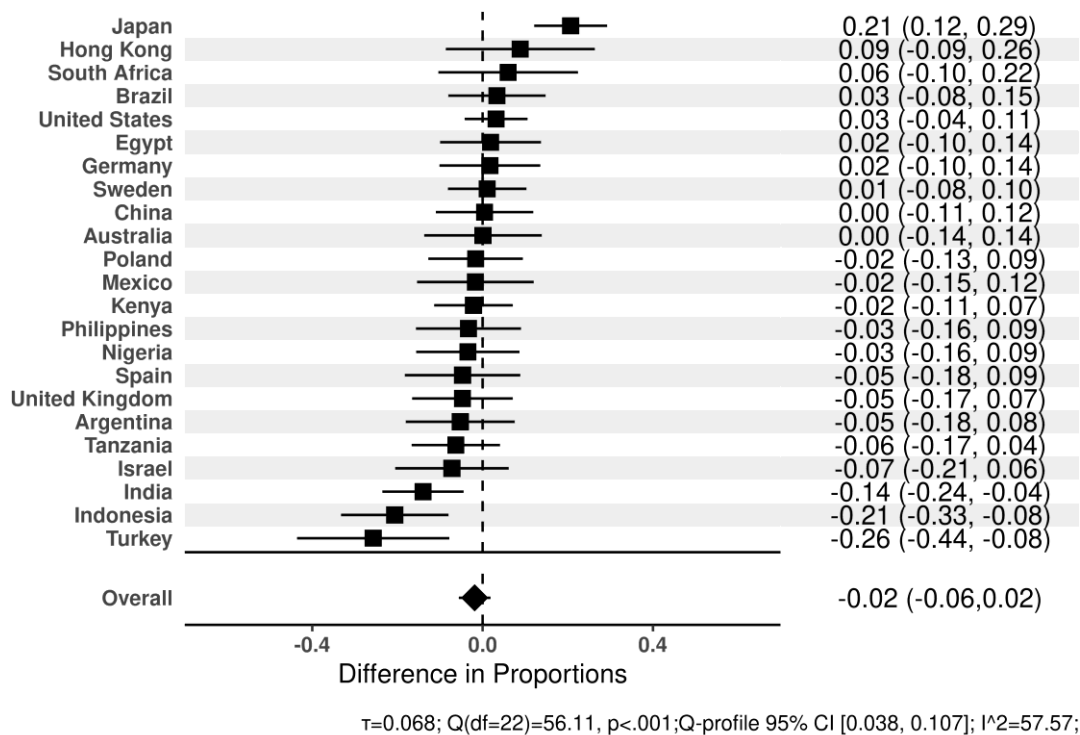

Figure S51. Forest plot for `Age group` - `(Ref: 1943-1953 (current age: 70-79 years)) 1983-1993 (current age: 30-39 years)`

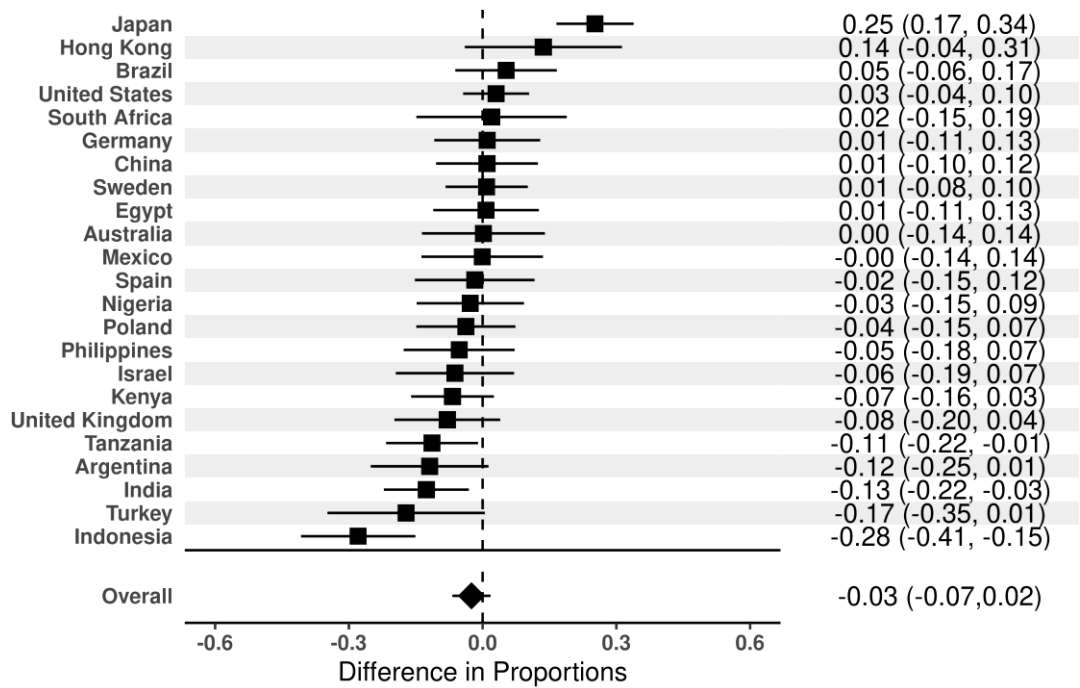

$\tau=0.085$ ;  $Q(df=22)=76.95$ ,  $p<.001$ ; Q-profile 95% CI [0.055, 0.129];  $I^2=67.91$ ;

Figure S52. Forest plot for `Age group` - `(Ref: 1943-1953 (current age: 70-79 years)) 1993-1998 (current age: 25-29 years)`

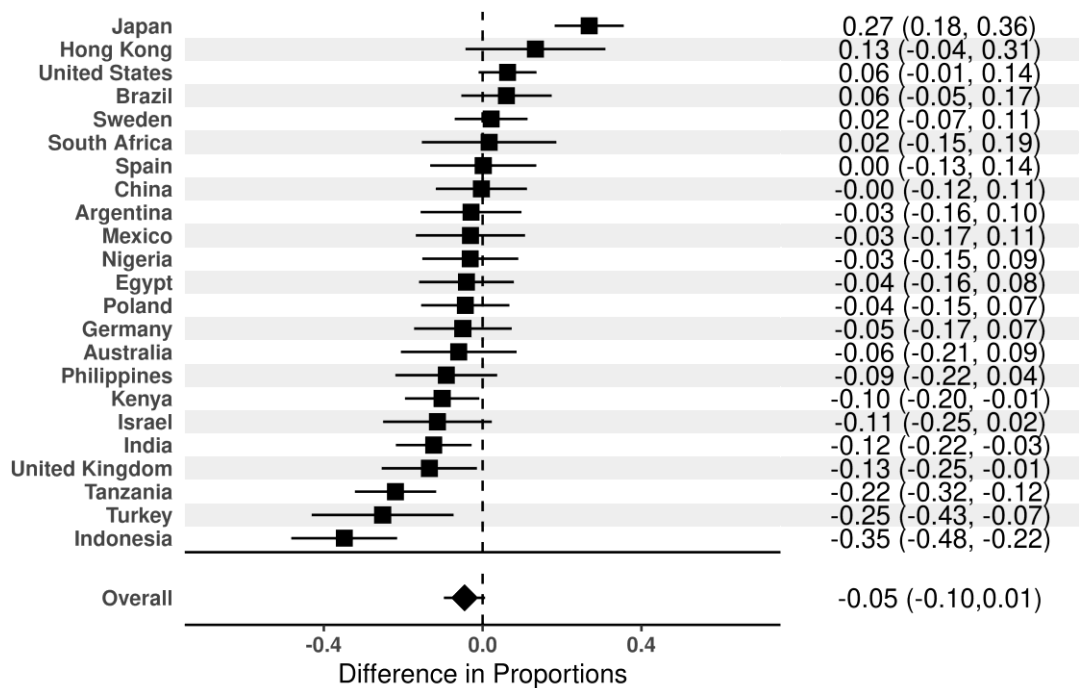

$\tau=0.110$ ;  $Q(df=22)=111.44$ ,  $p<.001$ ; Q-profile 95% CI [0.075, 0.160];  $I^2=77.96$ ;

Figure S53. Forest plot for `Age group`-`(Ref: 1953-1963 (current age: 60-69 years)) 1963-1973 (current age: 50-59 years)`

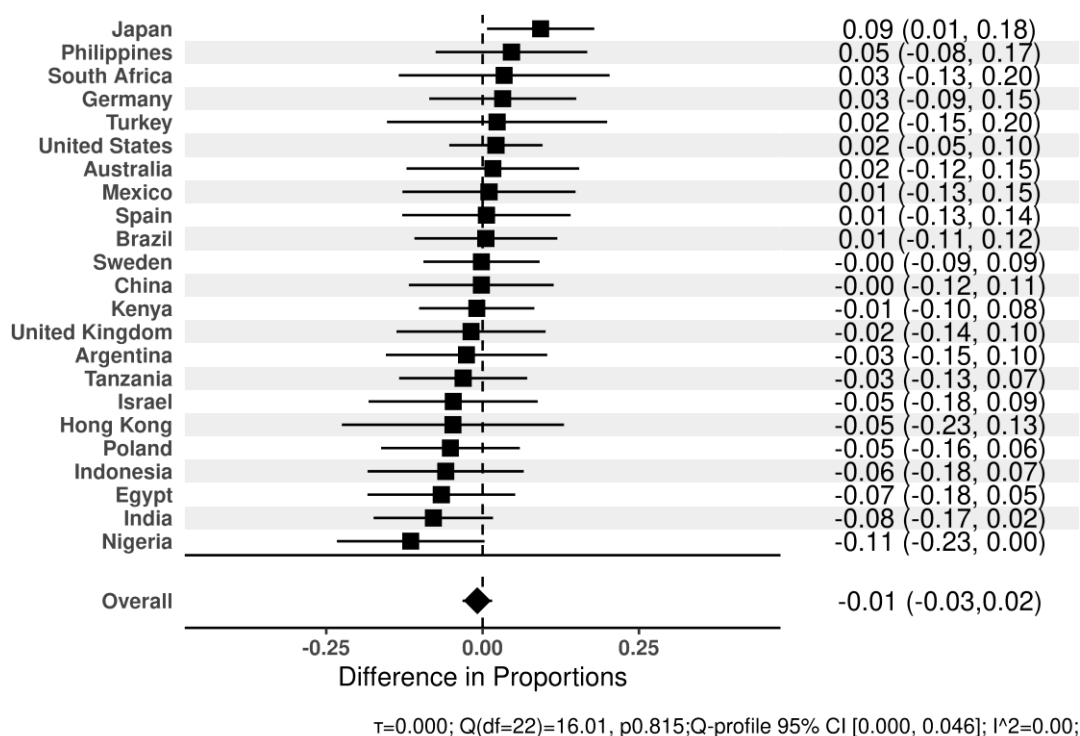

Figure S54. Forest plot for `Age group`-`(Ref: 1953-1963 (current age: 60-69 years)) 1973-1983 (current age: 40-49 years)`

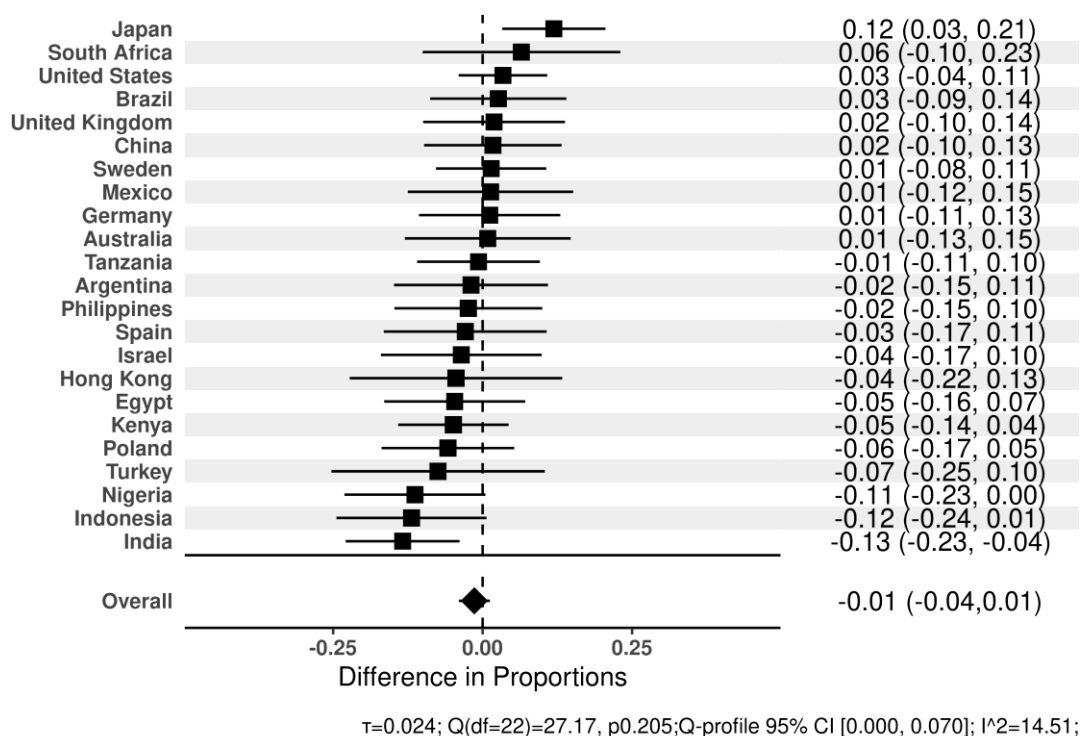

Figure S55. Forest plot for `Age group`-`(Ref: 1953-1963 (current age: 60-69 years)) 1983-1993 (current age: 30-39 years)`

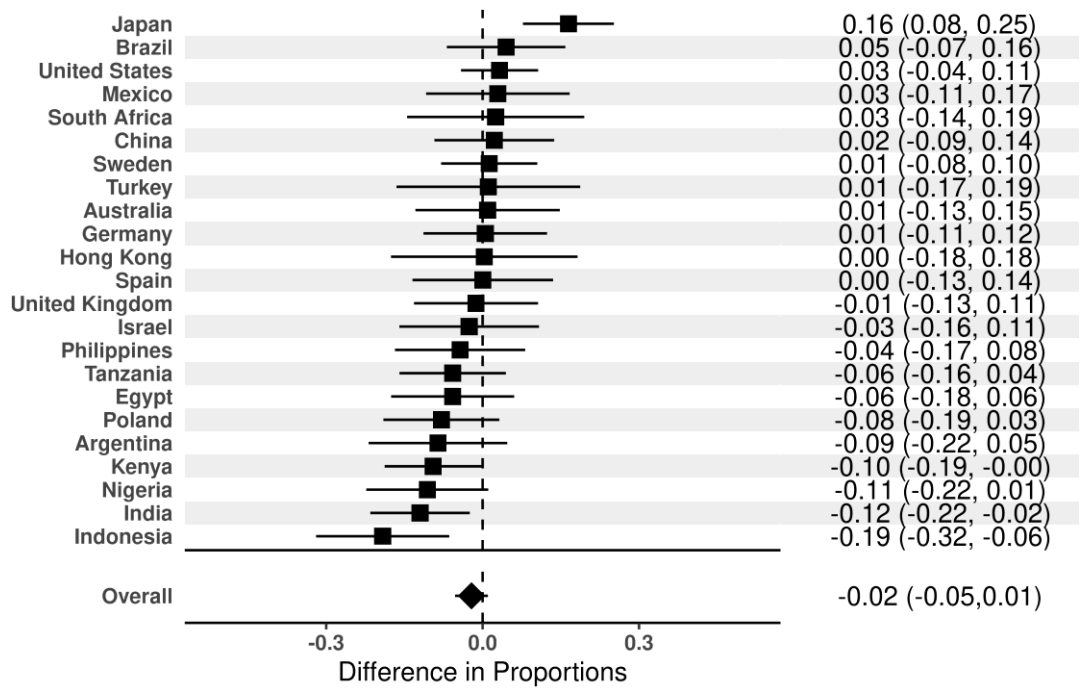

Figure S56. Forest plot for `Age group`-`(Ref: 1953-1963 (current age: 60-69 years)) 1993-1998 (current age: 25-29 years)`

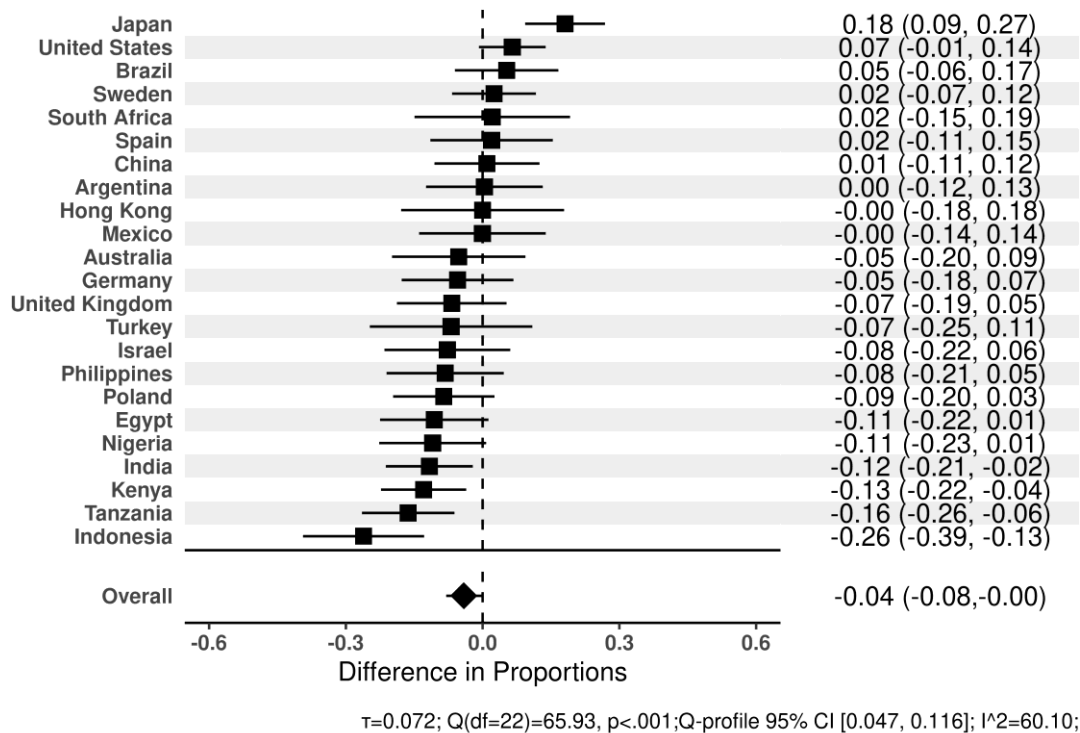

Figure S57. Forest plot for `Age group`-`(Ref: 1963-1973 (current age: 50-59 years)) 1973-1983 (current age: 40-49 years)`

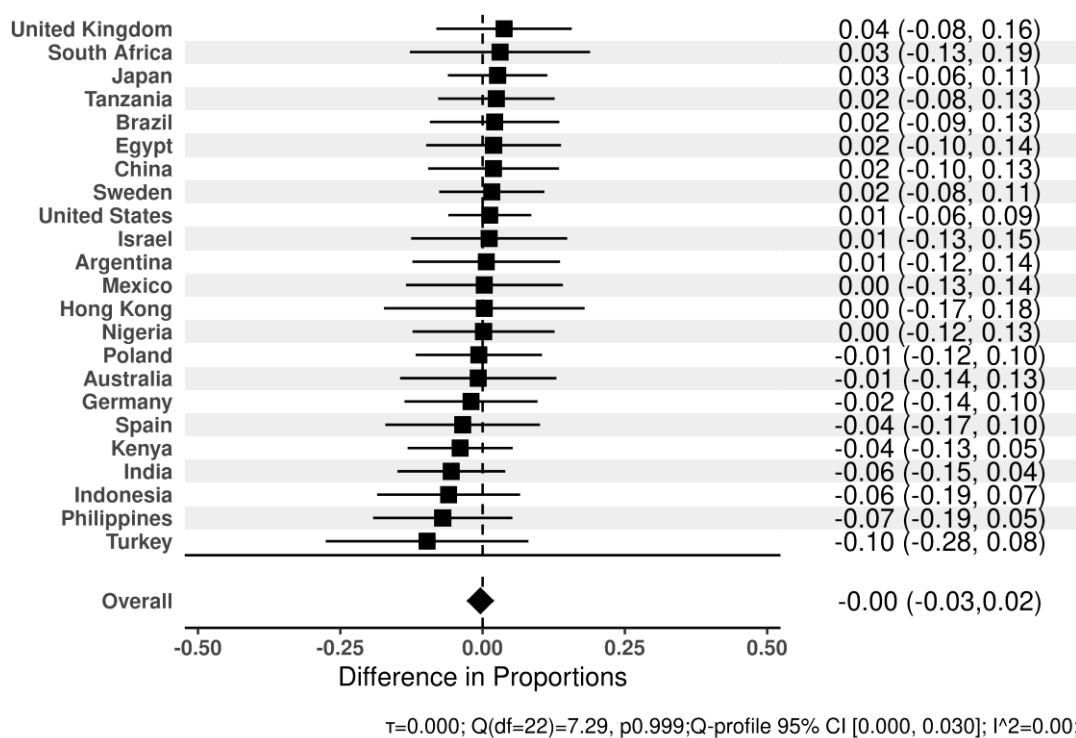

Figure S58. Forest plot for `Age group`-`(Ref: 1963-1973 (current age: 50-59 years)) 1983-1993 (current age: 30-39 years)`

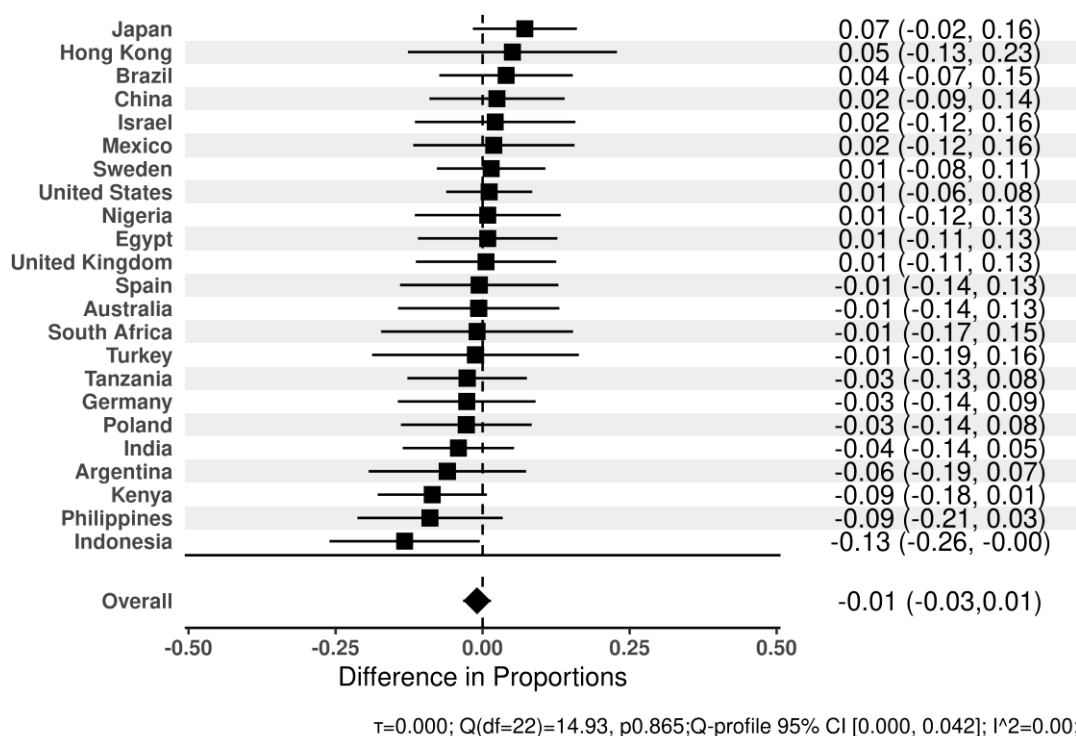

Figure S59. Forest plot for `Age group`-`(Ref: 1963-1973 (current age: 50-59 years)) 1993-1998 (current age: 25-29 years)`

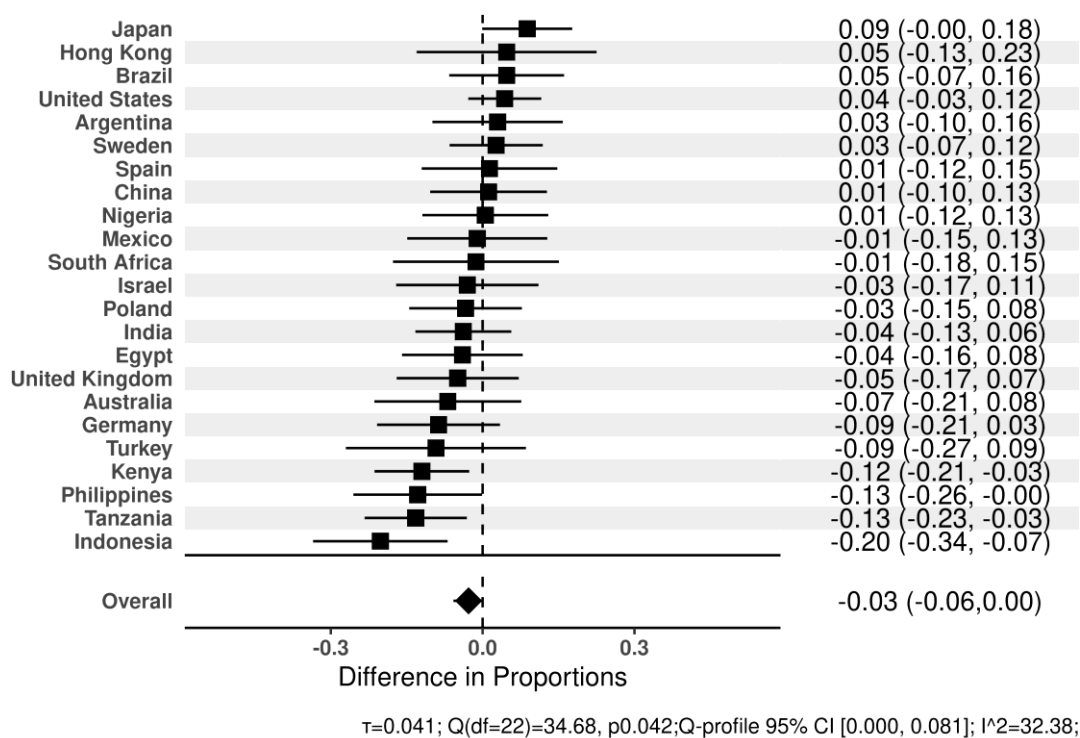

Figure S60. Forest plot for `Age group`-`(Ref: 1973-1983 (current age: 40-49 years)) 1983-1993 (current age: 30-39 years)`

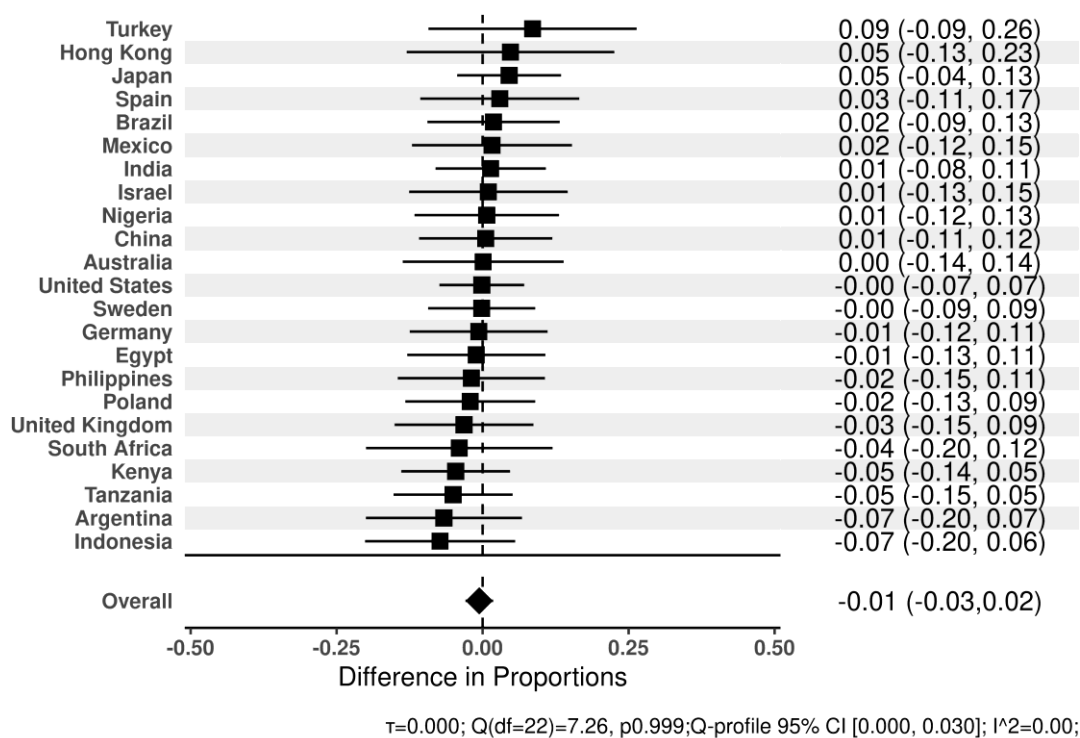

Figure S61. Forest plot for `Age group`-`(Ref: 1973-1983 (current age: 40-49 years)) 1993-1998 (current age: 25-29 years)`

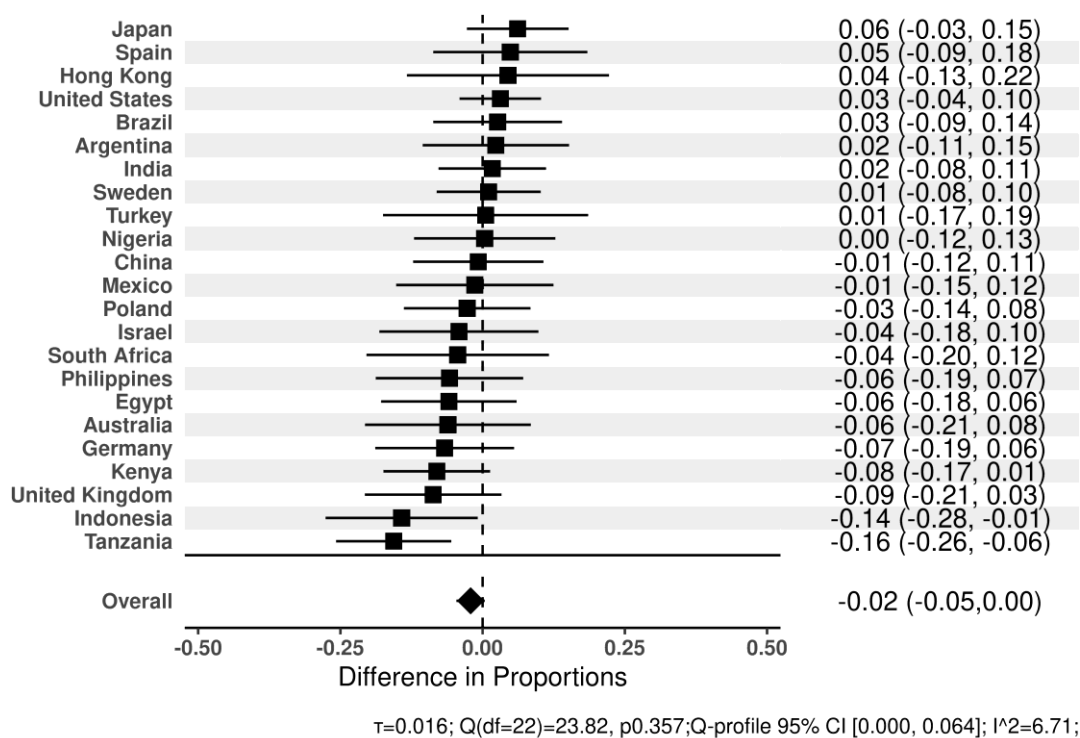

Figure S62. Forest plot for `Age group`-`(Ref: 1983-1993 (current age: 30-39 years)) 1993-1998 (current age: 25-29 years)`

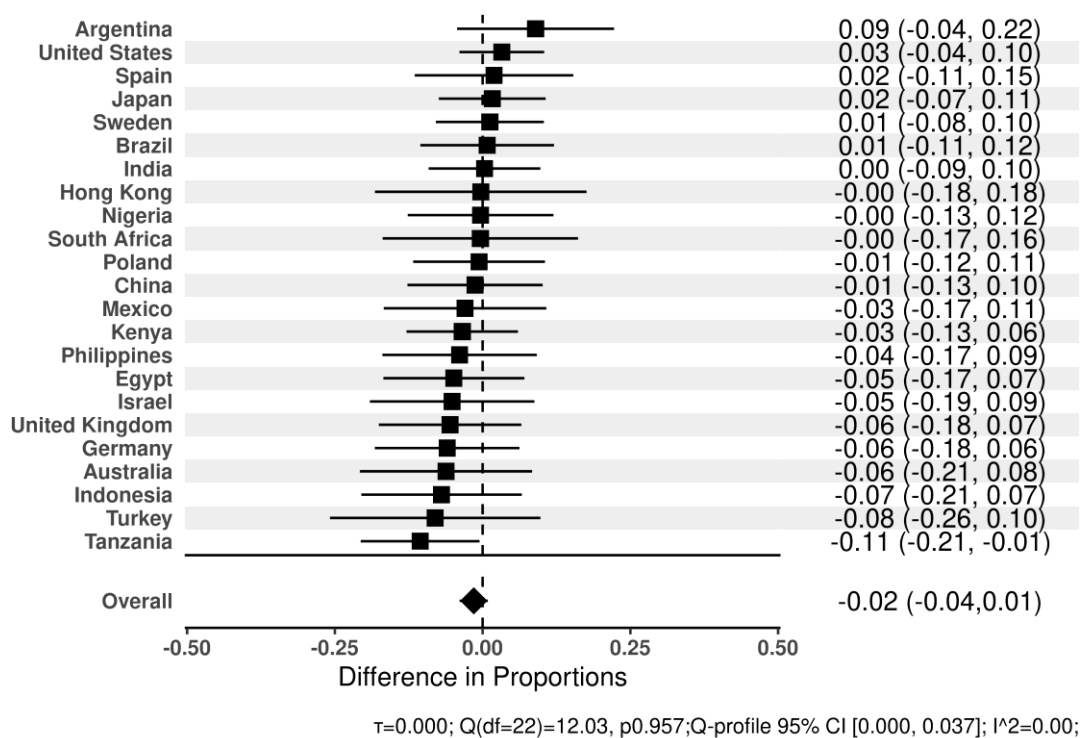

Figure S63. Forest plot for `Gender` - `(Ref: Male) Female`

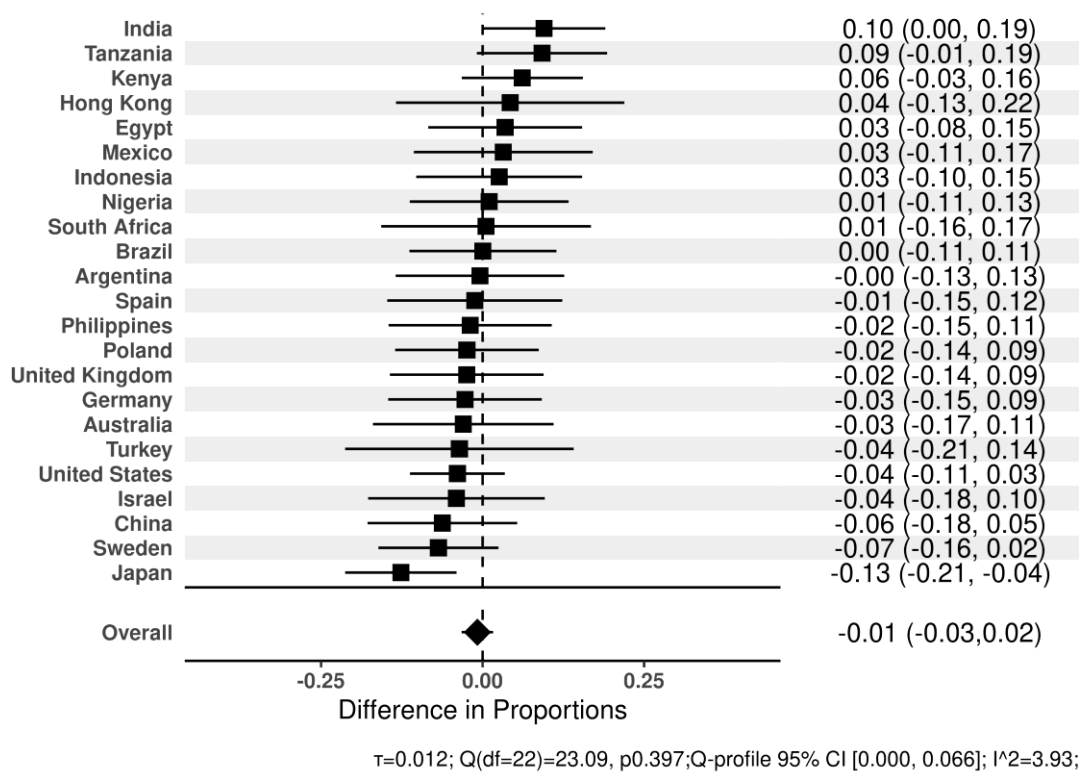

Figure S64. Forest plot for `Gender` - `(Ref: Male) Other`

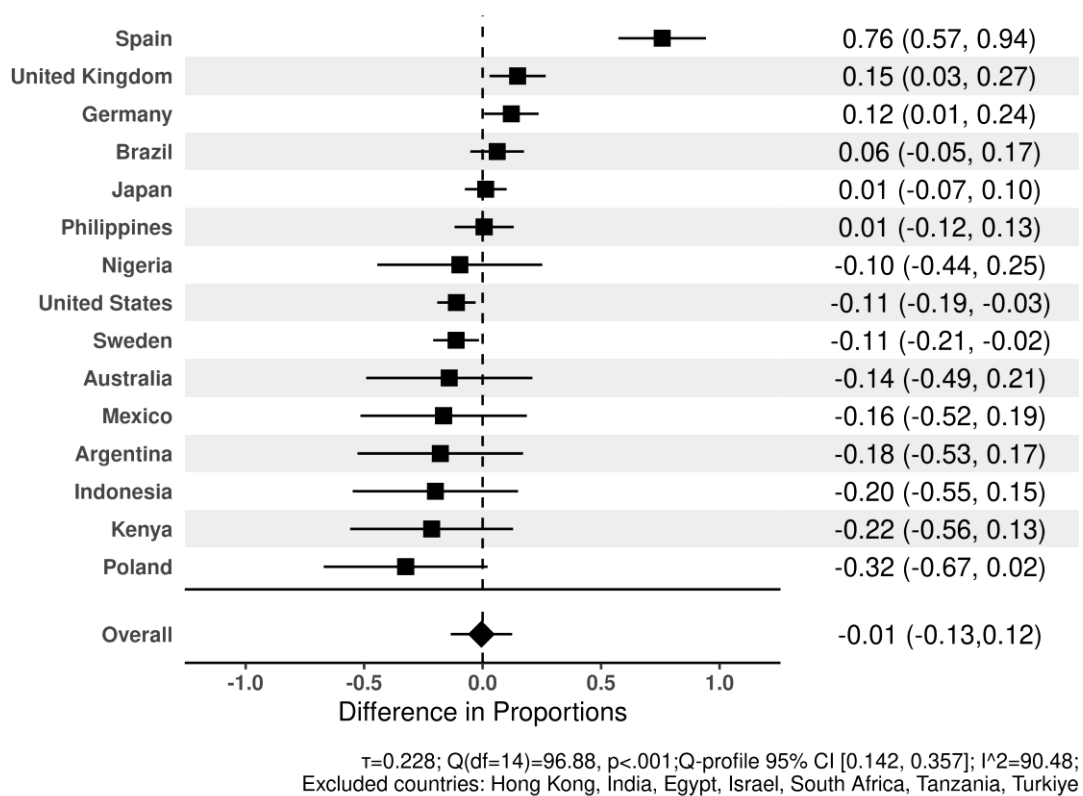

Figure S65. Forest plot for `Gender` - `(Ref: Female) Other`

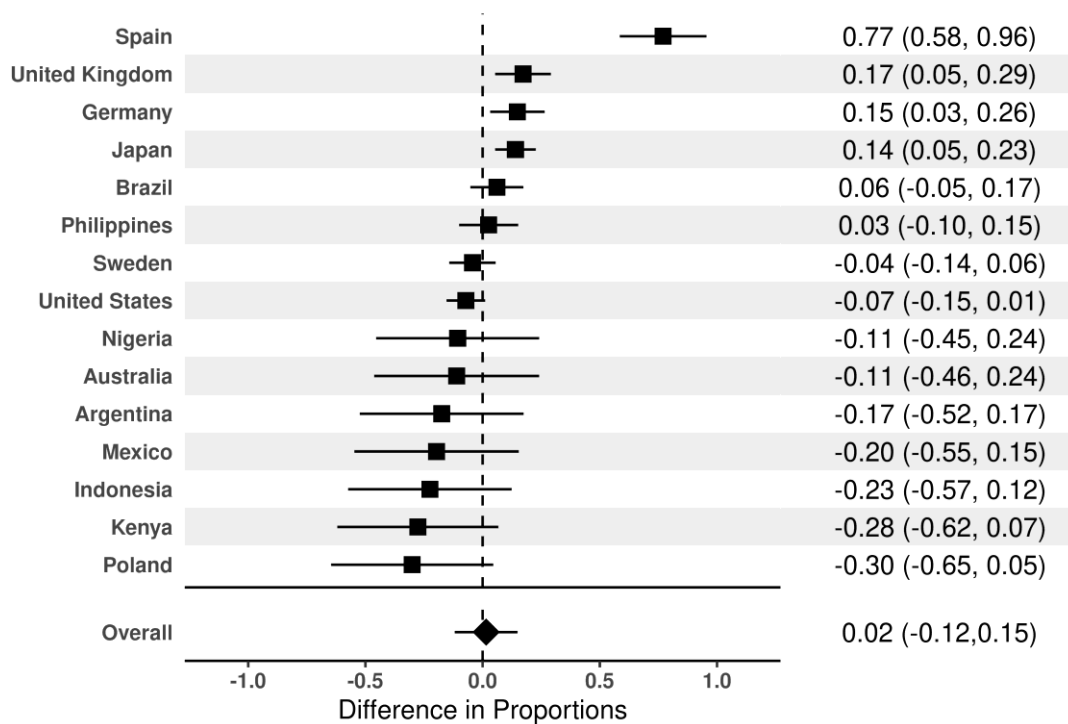

$\tau=0.237$ ;  $Q(df=14)=95.69$ ,  $p<.001$ ; Q-profile 95% CI [0.145, 0.369];  $I^2=91.05$ ;  
Excluded countries: Hong Kong, India, Egypt, Israel, South Africa, Tanzania, Turkiye

Figure S66. Forest plot for `Marital status` - `(Ref: Single, never married) Divorced`

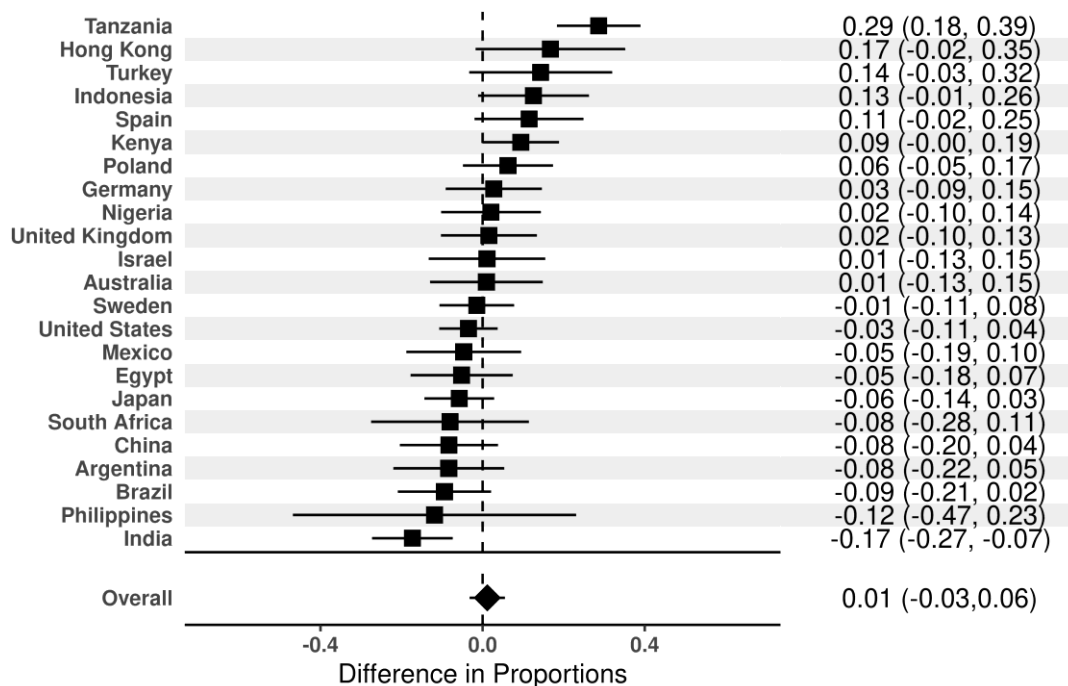

$\tau=0.084$ ;  $Q(df=22)=68.83$ ,  $p<.001$ ; Q-profile 95% CI [0.053, 0.130];  $I^2=65.82$ ;

Figure S67. Forest plot for `Marital status`-(Ref: Single, never married)  
Domestic partner`

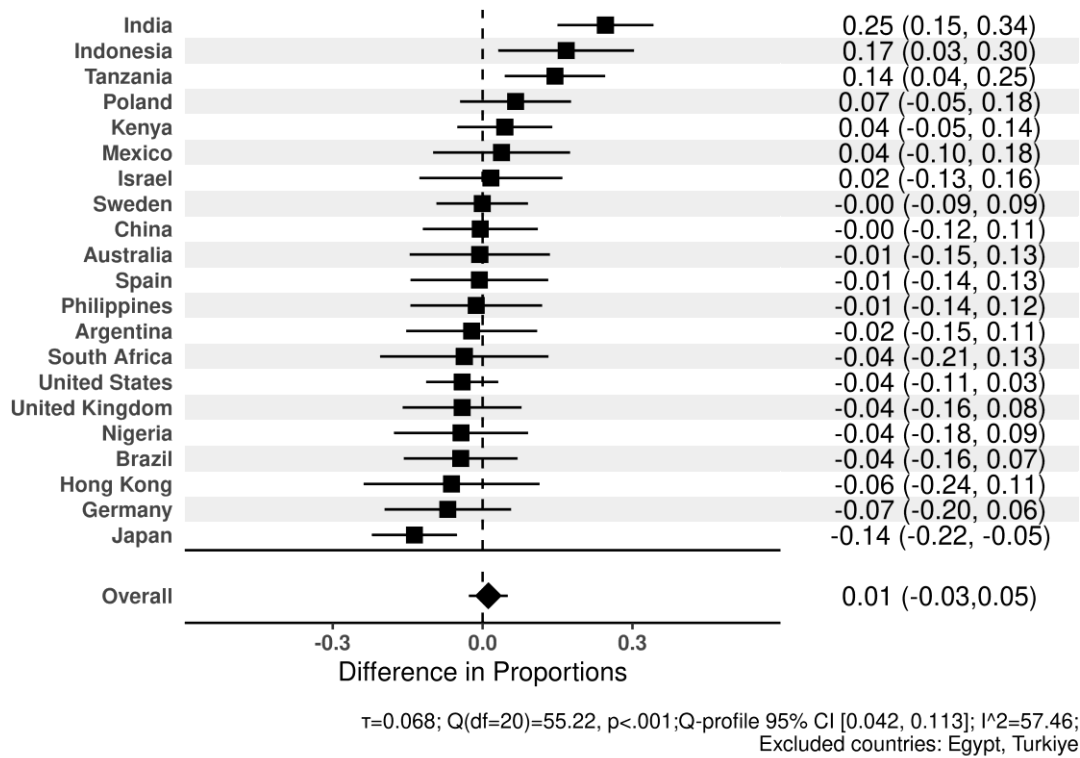

Figure S68. Forest plot for `Marital status`-(Ref: Single, never married)  
Married`

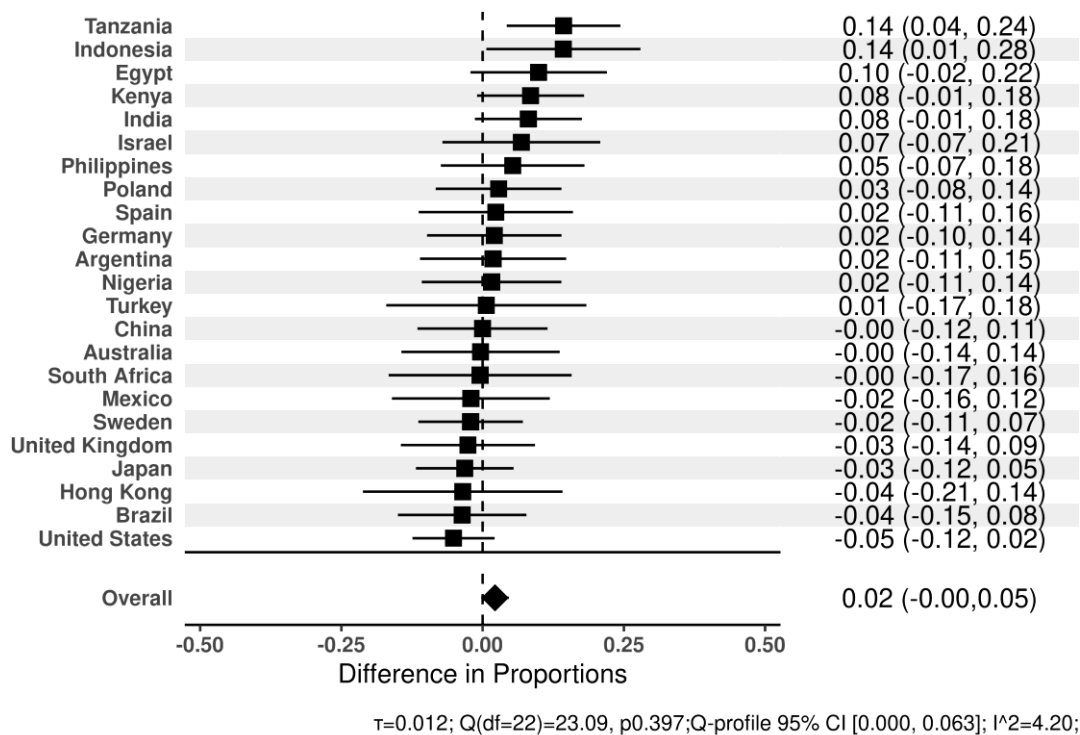

Figure S69. Forest plot for `Marital status`-(Ref: Single, never married)  
Separated`

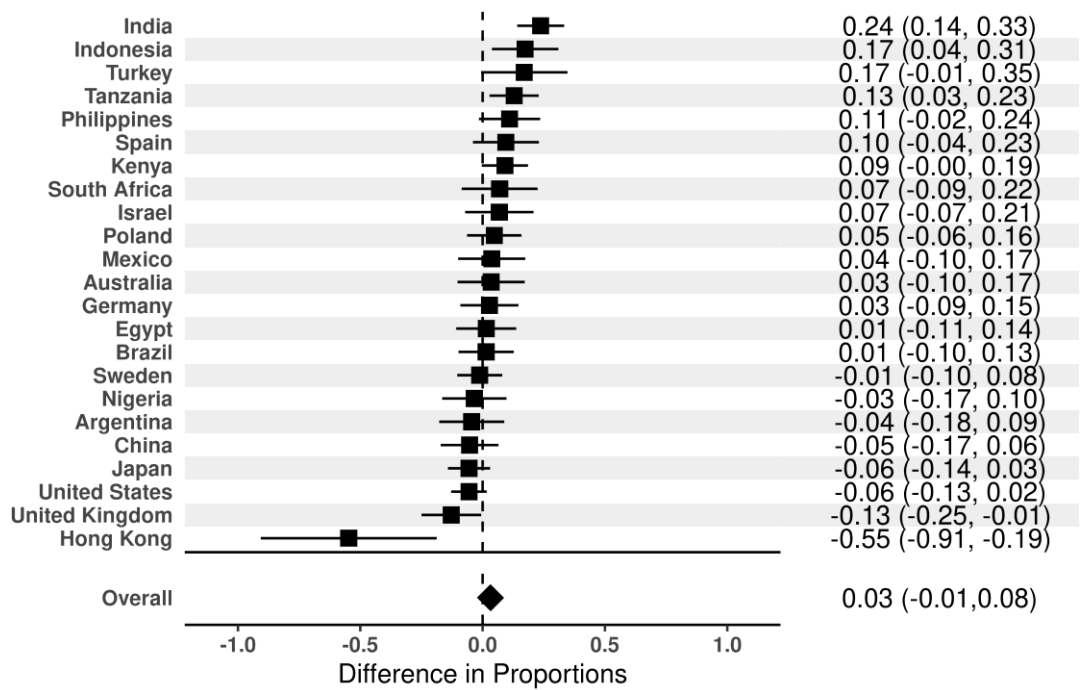

$\tau=0.092$ ;  $Q(df=22)=63.47$ ,  $p<.001$ ; Q-profile 95% CI [0.037, 0.124];  $I^2=70.48$ ;

Figure S70. Forest plot for `Marital status`-(Ref: Single, never married)  
Widowed`

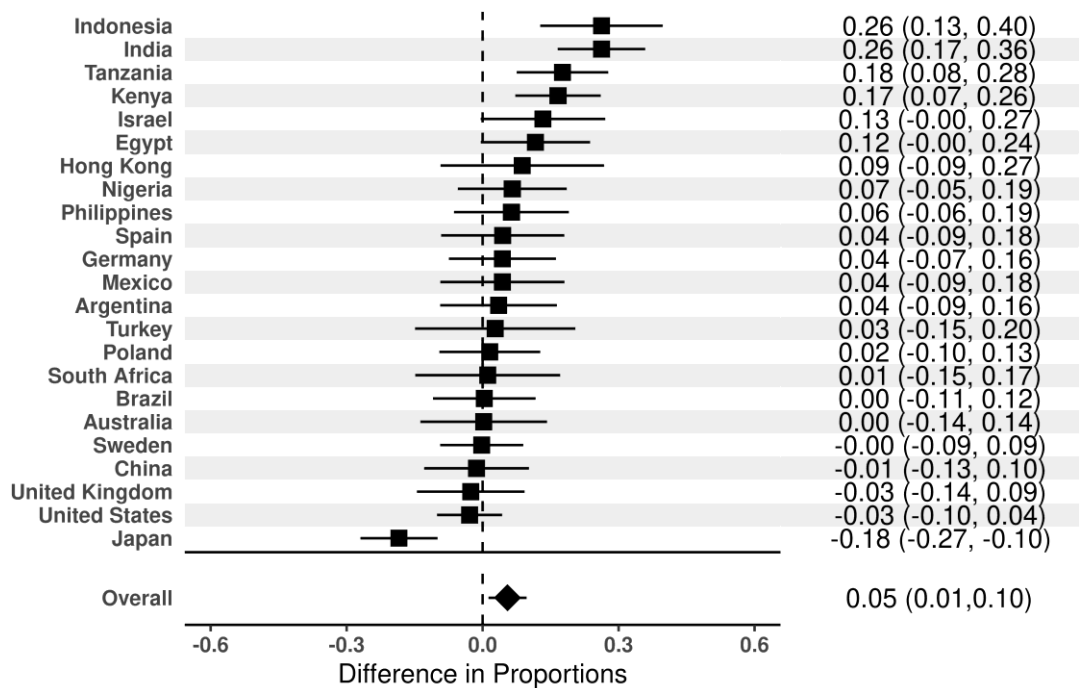

$\tau=0.083$ ;  $Q(df=22)=82.31$ ,  $p<.001$ ; Q-profile 95% CI [0.057, 0.129];  $I^2=66.65$ ;

Figure S71. Forest plot for `Marital status`-(Ref: Divorced) Domestic partner`

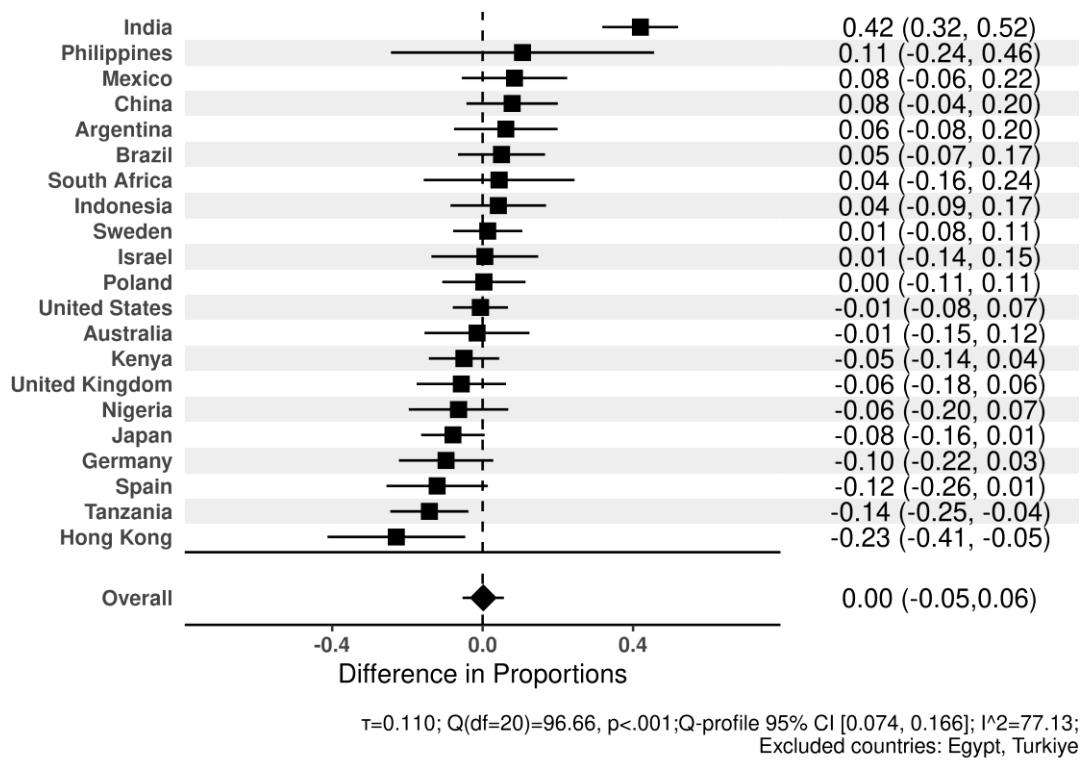

Figure S72. Forest plot for `Marital status`-(Ref: Divorced) Married`

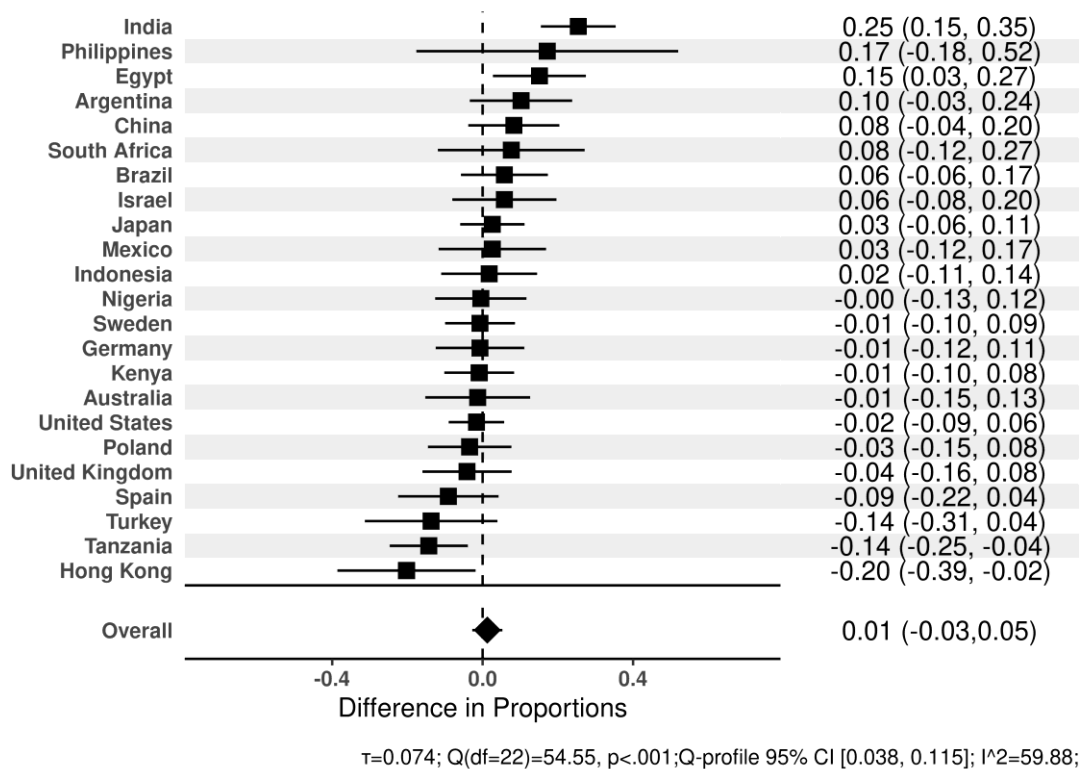

Figure S73. Forest plot for `Marital status`-(Ref: Divorced) Separated`

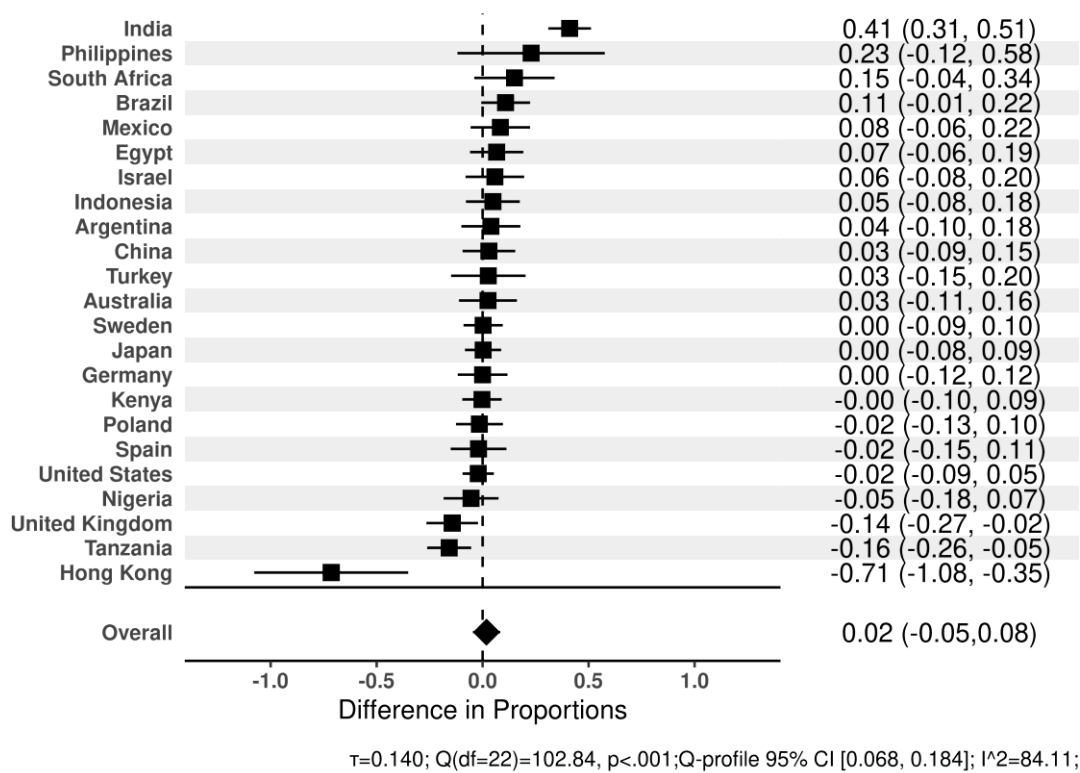

Figure S74. Forest plot for `Marital status`-(Ref: Divorced) Widowed`

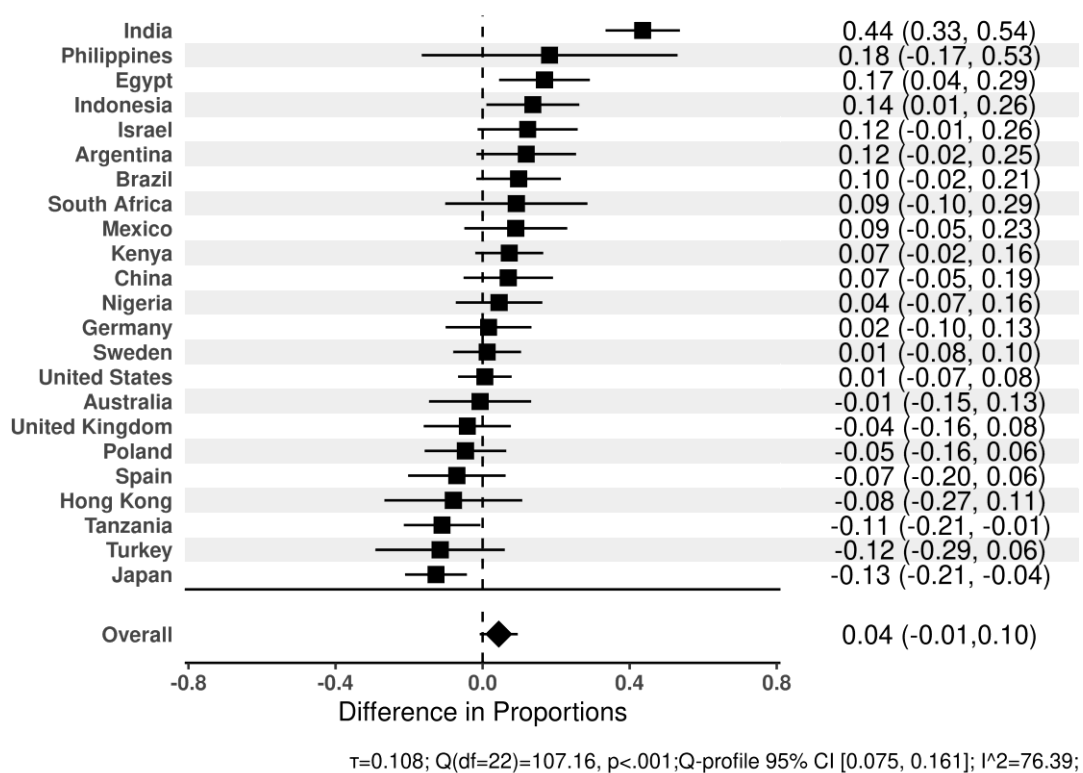

Figure S75. Forest plot for `Marital status`-(Ref: Domestic partner)  
Married`

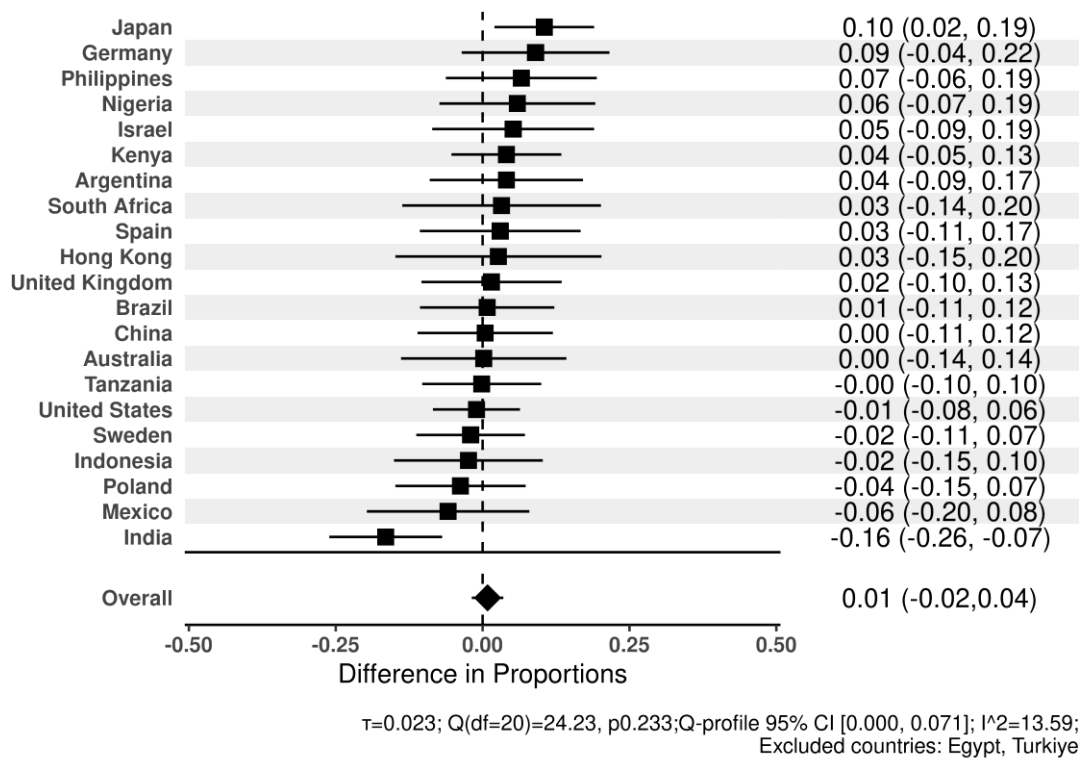

Figure S76. Forest plot for `Marital status`-(Ref: Domestic partner)  
Separated`

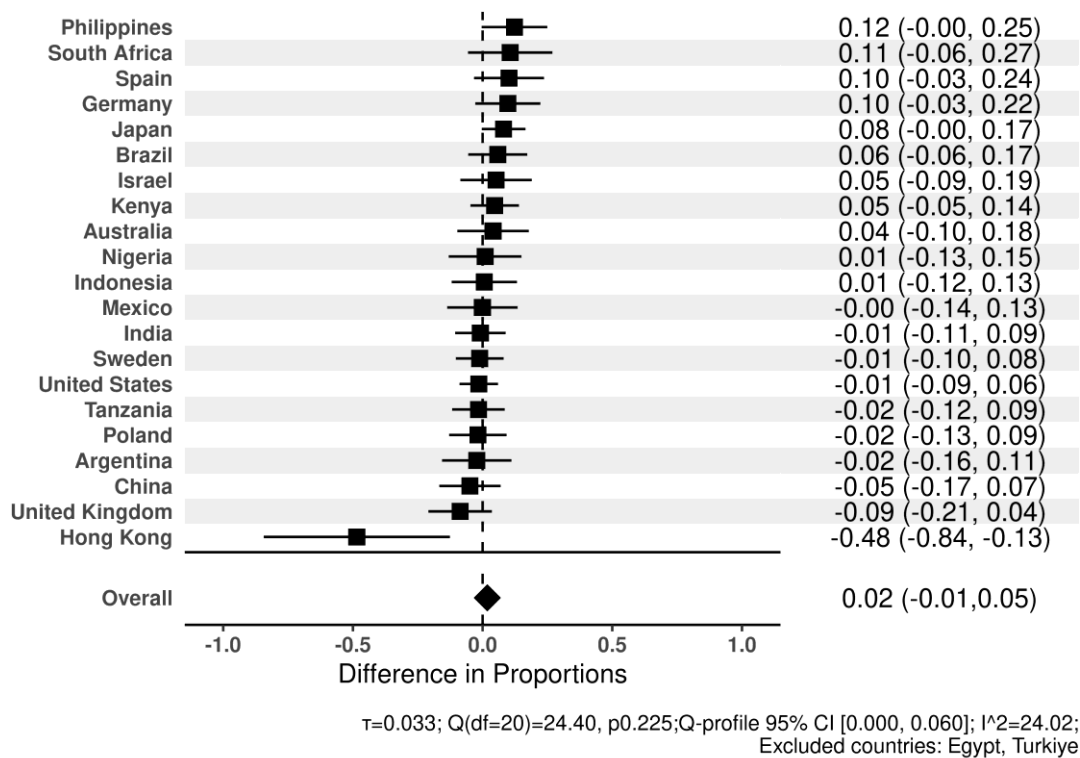

Figure S77. Forest plot for `Marital status`-(Ref: Domestic partner)  
Widowed`

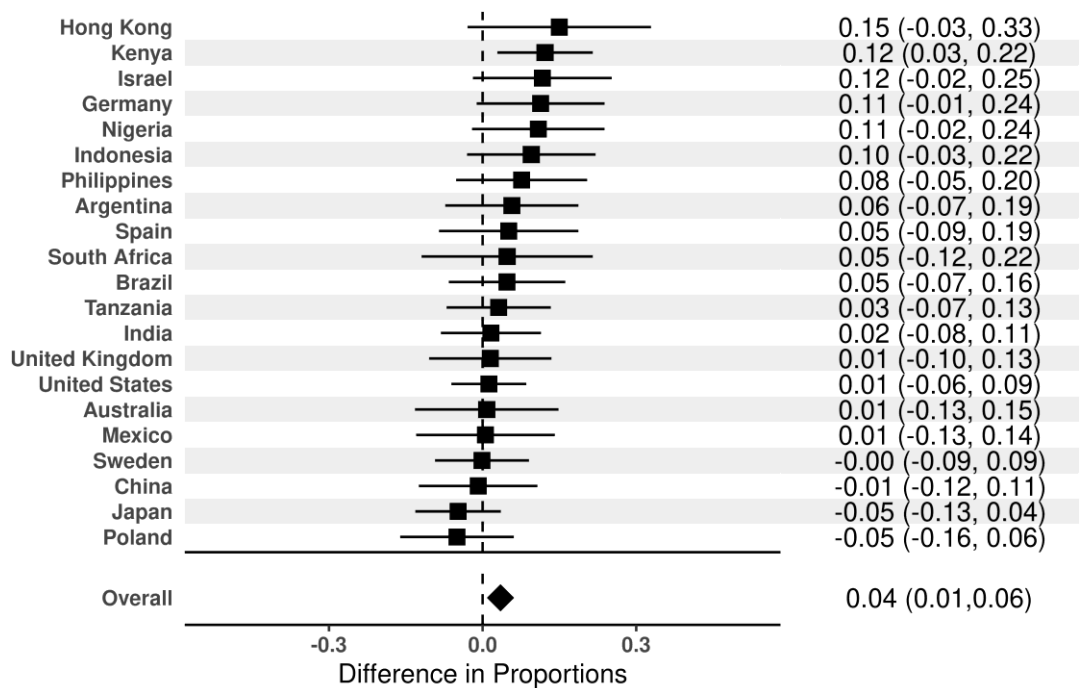

$\tau=0.000$ ;  $Q(df=20)=18.74$ ,  $p0.539$ ; Q-profile 95% CI [0.000, 0.055];  $I^2=0.00$ ;  
Excluded countries: Egypt, Turkiye

Figure S78. Forest plot for `Marital status`-(Ref: Married) Separated`

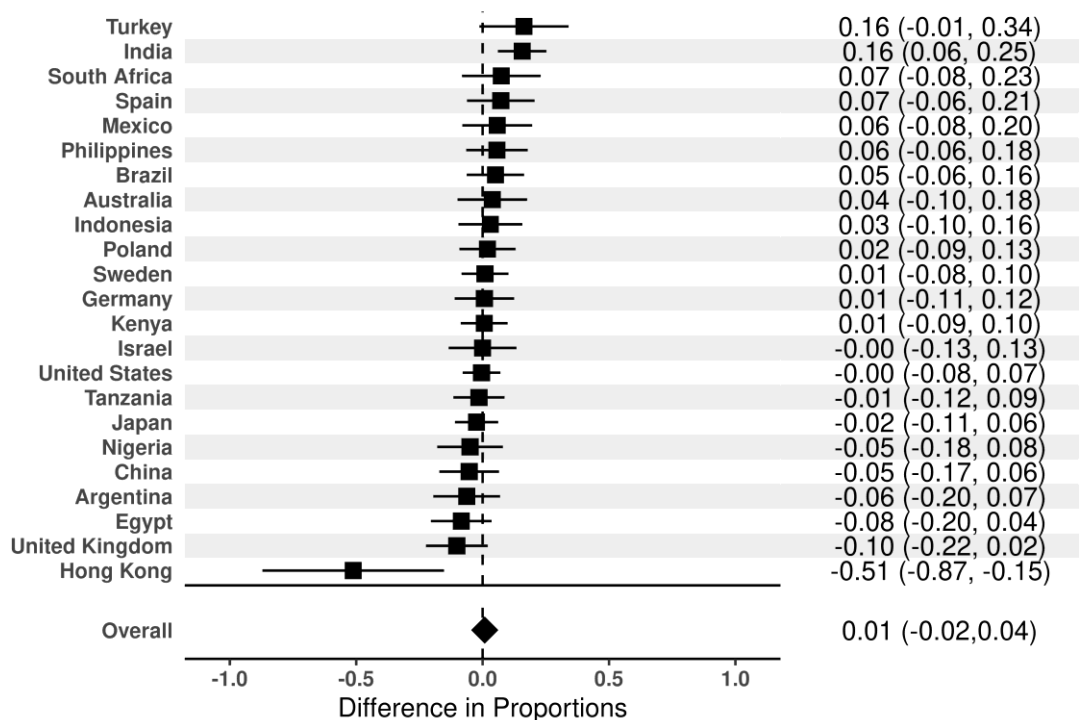

$\tau=0.050$ ;  $Q(df=22)=32.94$ ,  $p0.063$ ; Q-profile 95% CI [0.000, 0.075];  $I^2=42.09$ ;

Figure S79. Forest plot for `Marital status` - `(Ref: Married) Widowed`

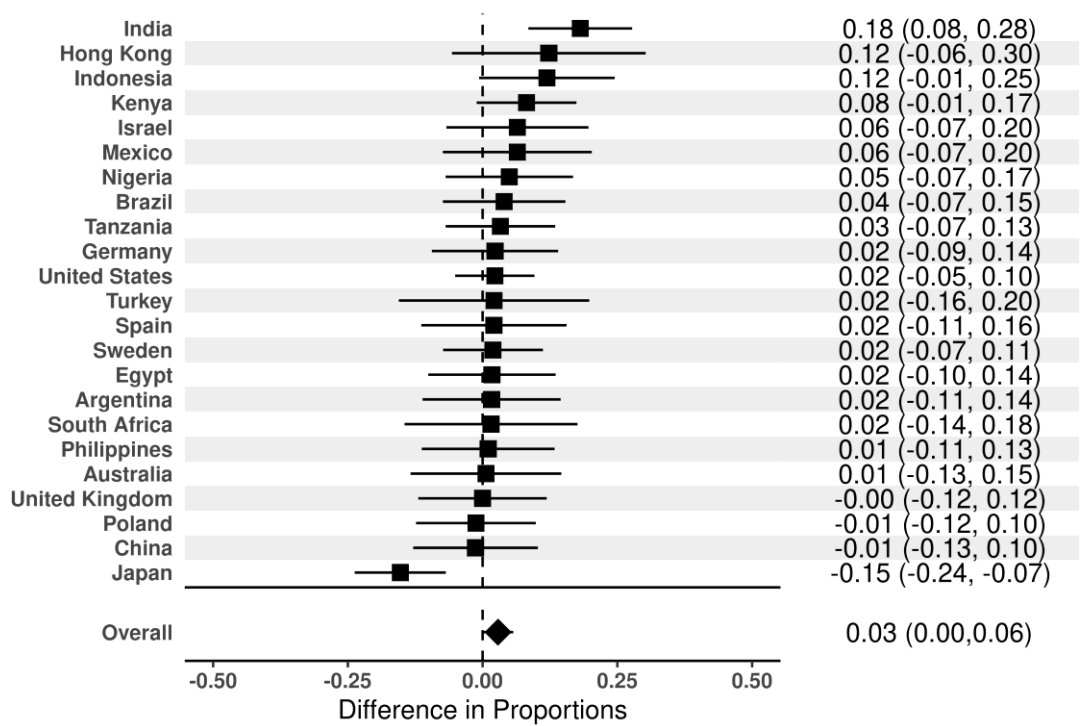

$\tau=0.036$ ;  $Q(df=22)=33.92$ ,  $p0.050$ ; Q-profile 95% CI [0.012, 0.080];  $I^2=27.26$ ;

Figure S80. Forest plot for `Marital status` - `(Ref: Separated) Widowed`

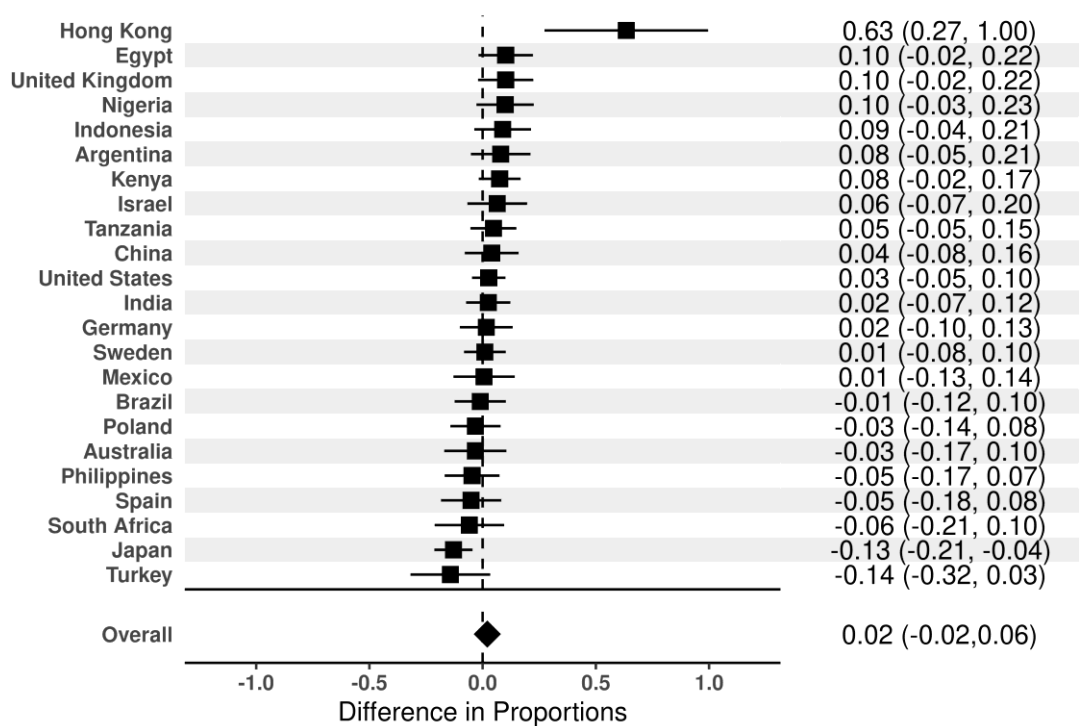

$\tau=0.067$ ;  $Q(df=22)=40.53$ ,  $p0.009$ ; Q-profile 95% CI [0.000, 0.091];  $I^2=56.66$ ;

Figure S81. Forest plot for `Employment status`-(Ref: Employed for an employer) Homemaker`

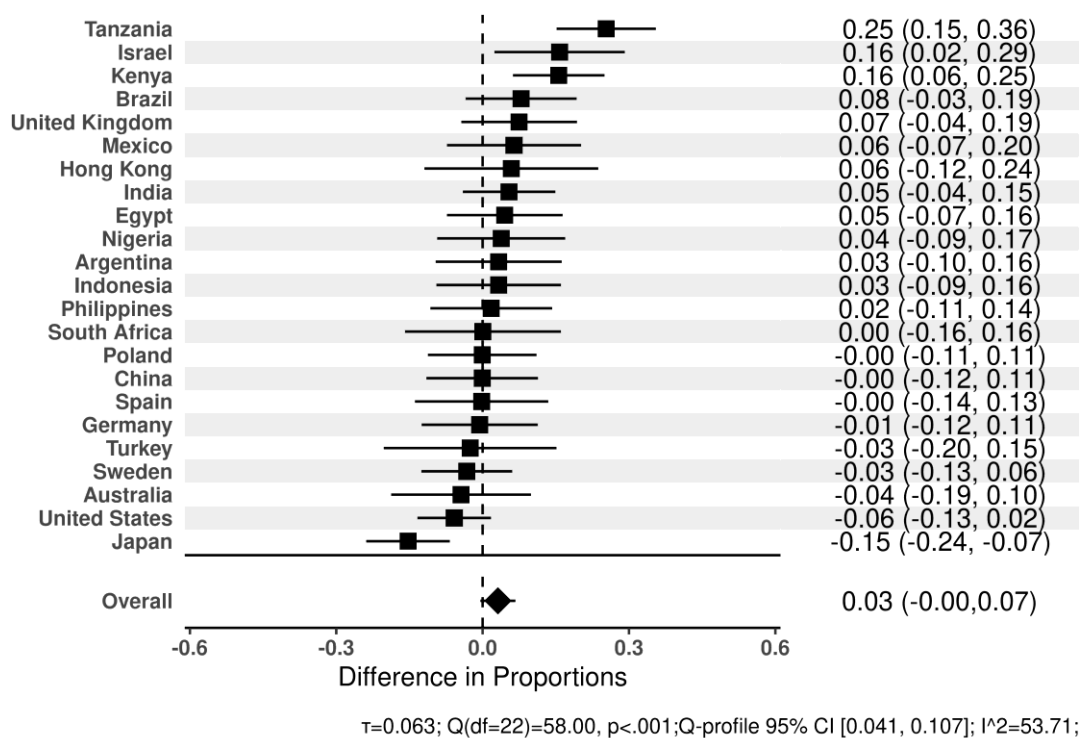

Figure S82. Forest plot for `Employment status`-(Ref: Employed for an employer) None of these/other`

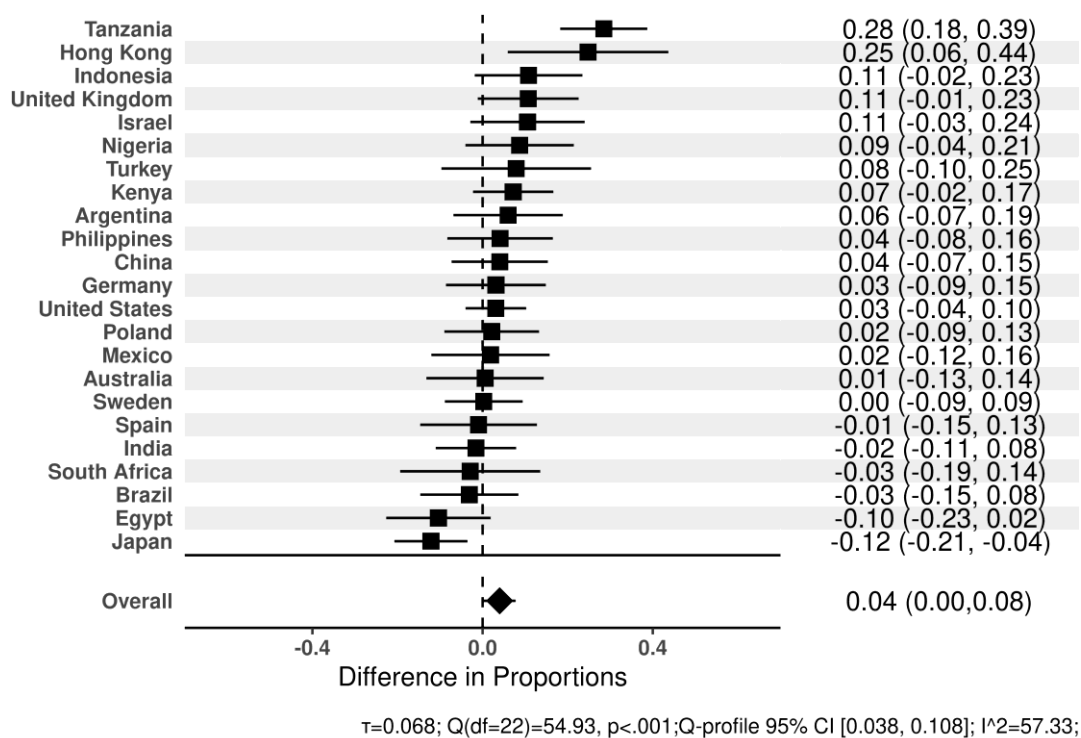

Figure S83. Forest plot for `Employment status`-(Ref: Employed for an employer) Retired`

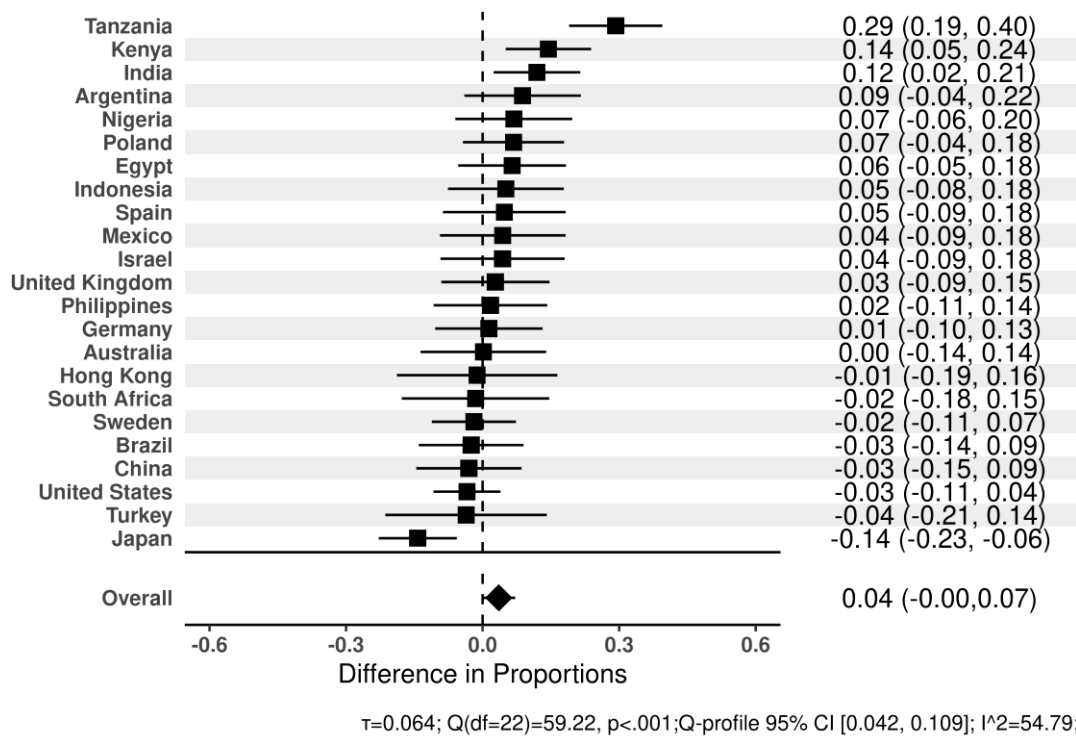

Figure S84. Forest plot for `Employment status`-(Ref: Employed for an employer) Self-employed`

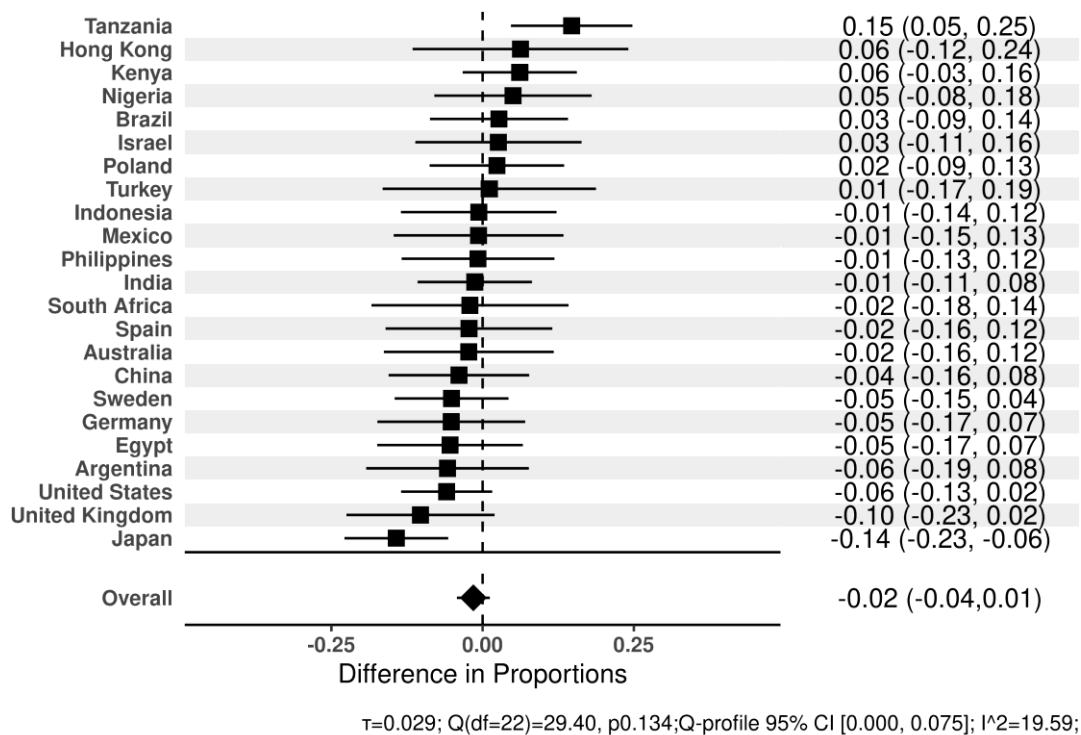

Figure S85. Forest plot for `Employment status` - `(Ref: Employed for an employer) Student`

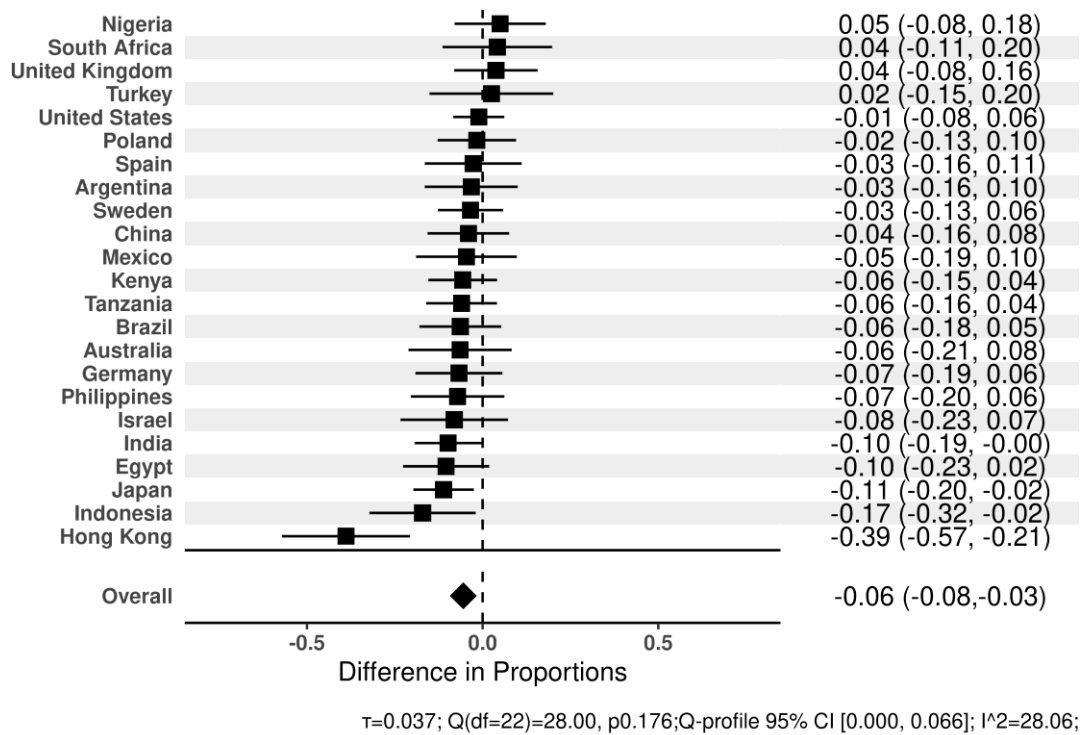

Figure S86. Forest plot for `Employment status` - `(Ref: Employed for an employer) Unemployed and looking for a job`

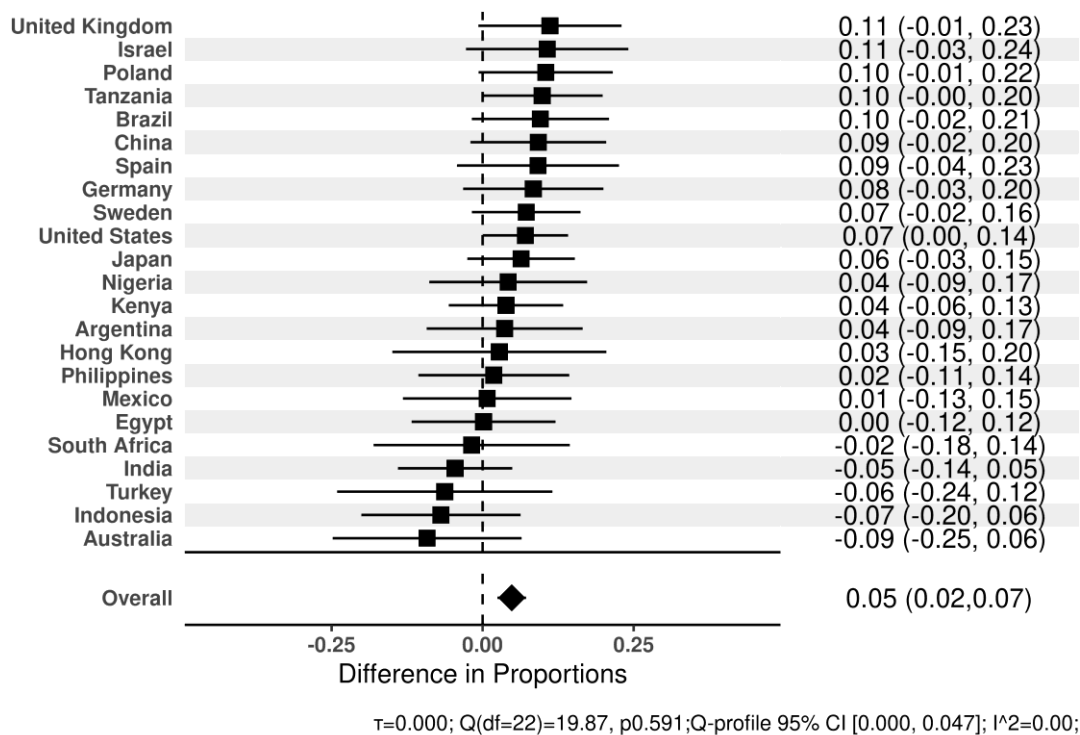

Figure S87. Forest plot for `Employment status` - `(Ref: Homemaker) None of these/other`

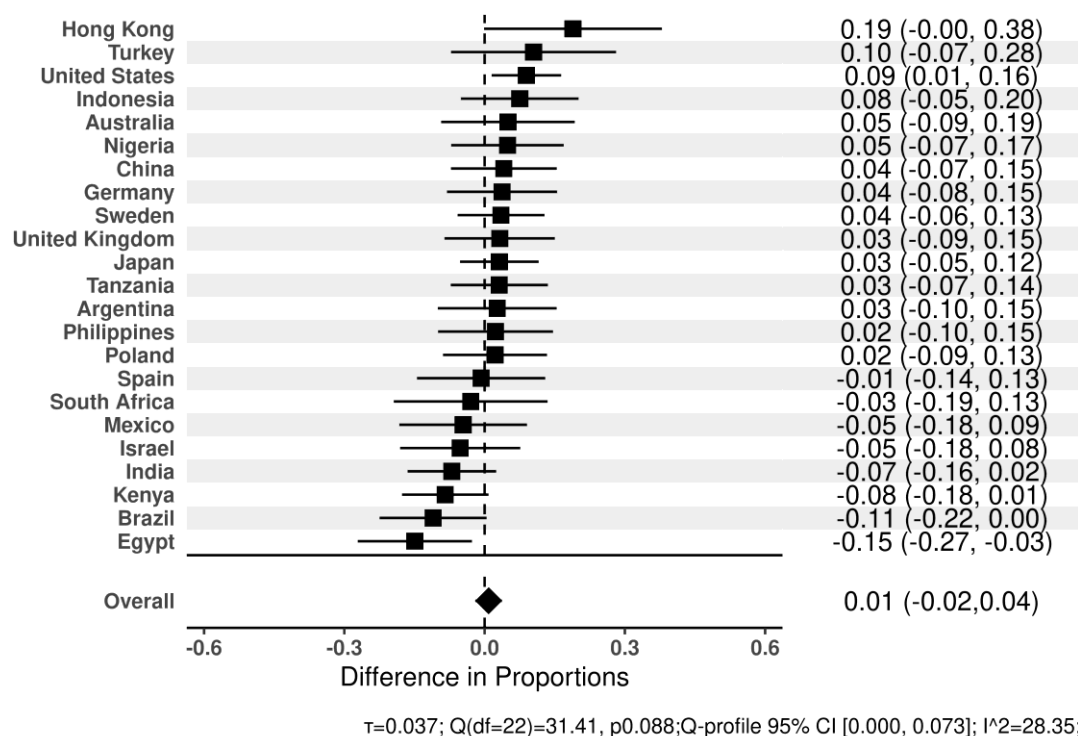

Figure S88. Forest plot for `Employment status` - `(Ref: Homemaker) Retired`

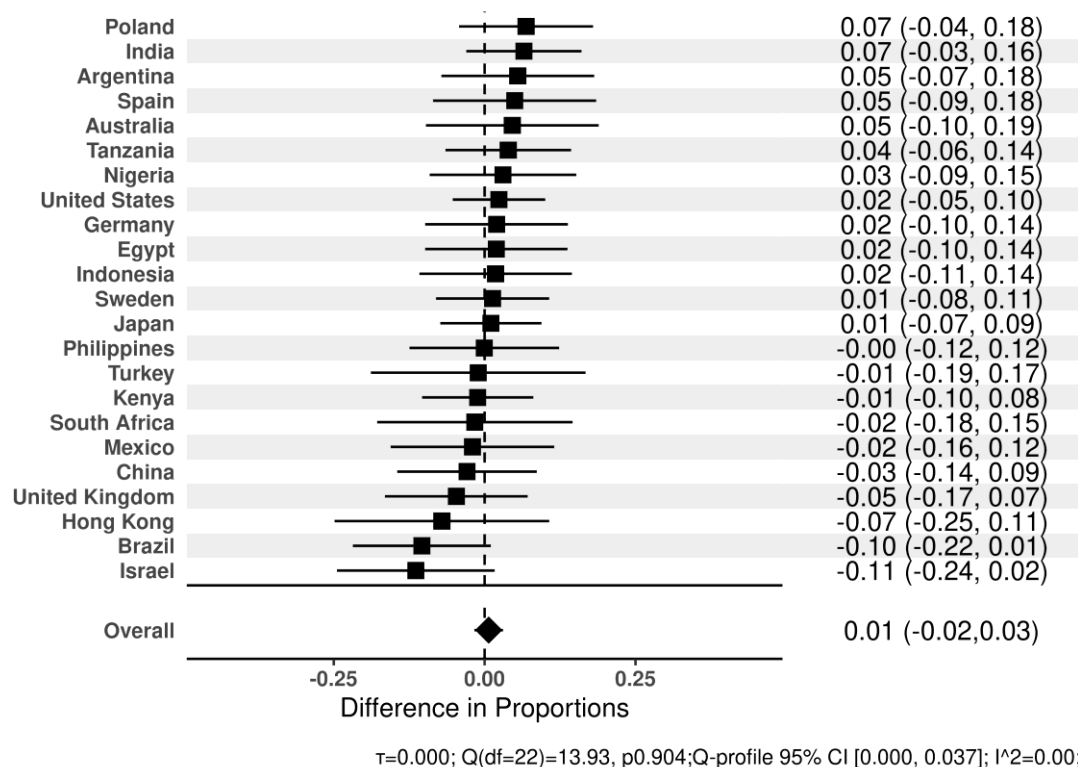

Figure S89. Forest plot for `Employment status`-(Ref: Homemaker)  
Self-employed`

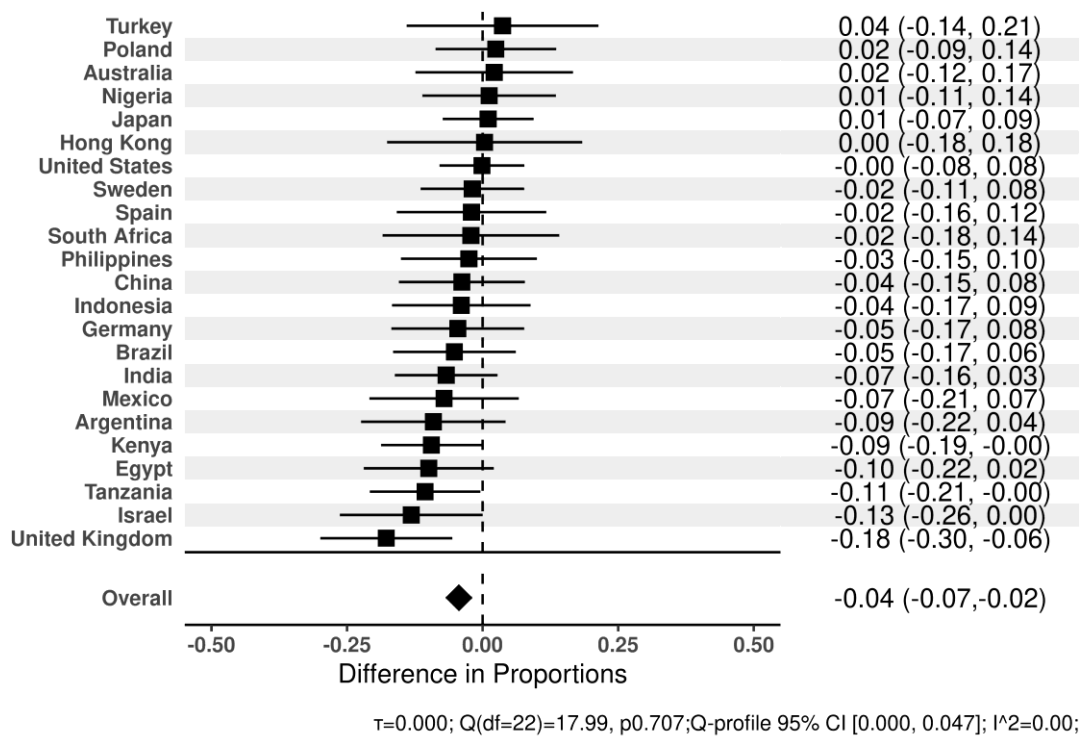

Figure S90. Forest plot for `Employment status`-(Ref: Homemaker) Student`

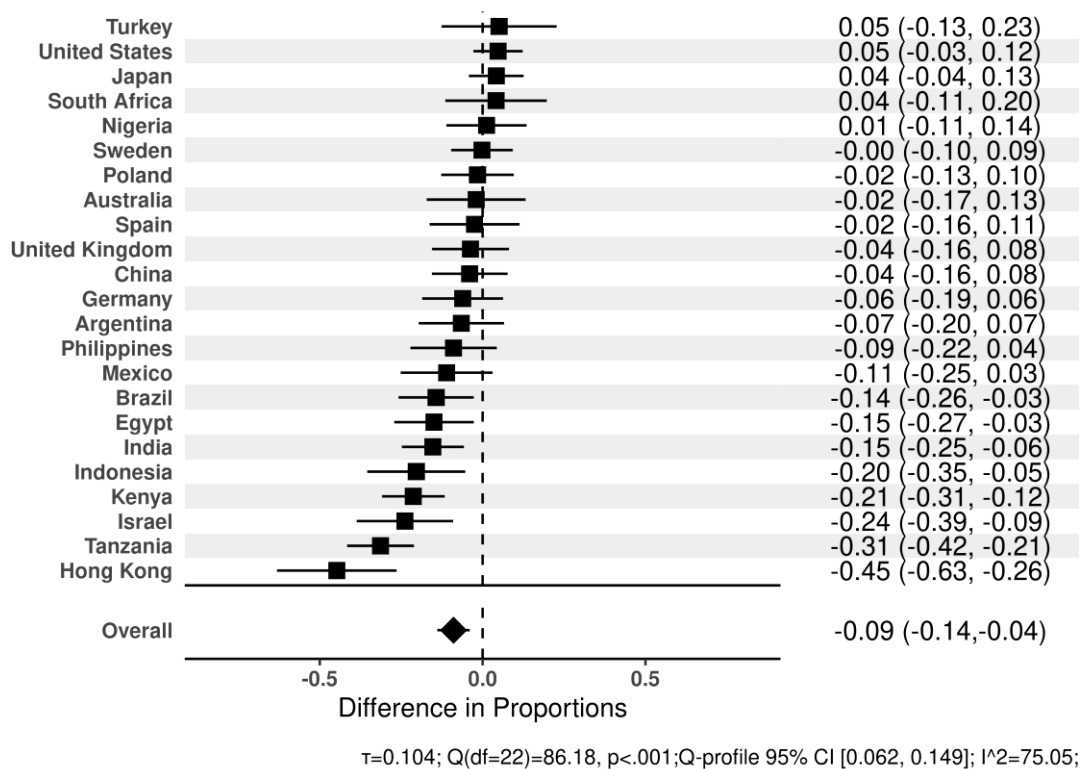

Figure S91. Forest plot for `Employment status` - `(Ref: Homemaker)  
Unemployed and looking for a job`

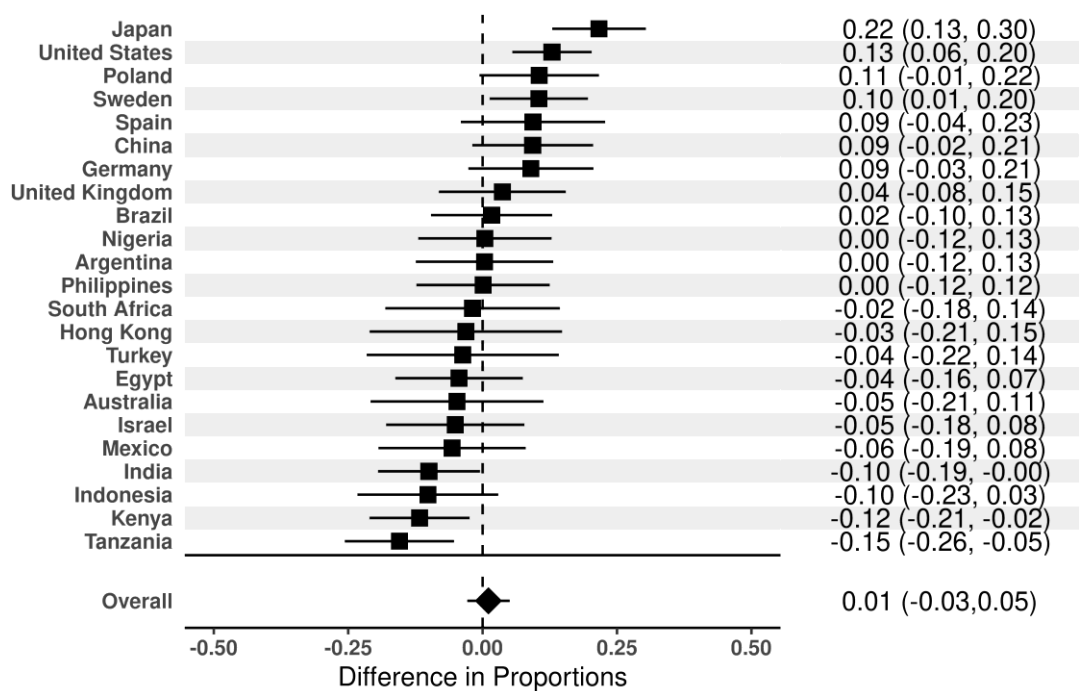

$\tau=0.075$ ;  $Q(df=22)=72.25$ ,  $p<.001$ ; Q-profile 95% CI [0.051, 0.120];  $I^2=62.03$ ;

Figure S92. Forest plot for `Employment status` - `(Ref: None of these/other)  
Retired`

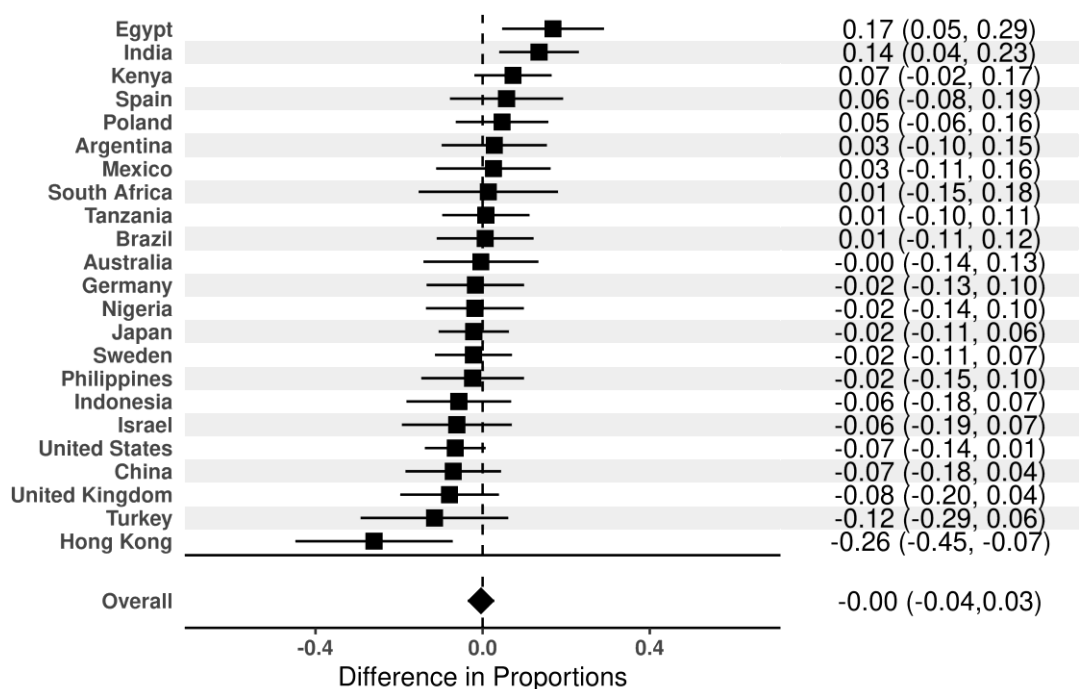

$\tau=0.049$ ;  $Q(df=22)=36.75$ ,  $p0.025$ ; Q-profile 95% CI [0.000, 0.083];  $I^2=41.82$ ;

Figure S93. Forest plot for `Employment status` - `(Ref: None of these/other)  
Self-employed`

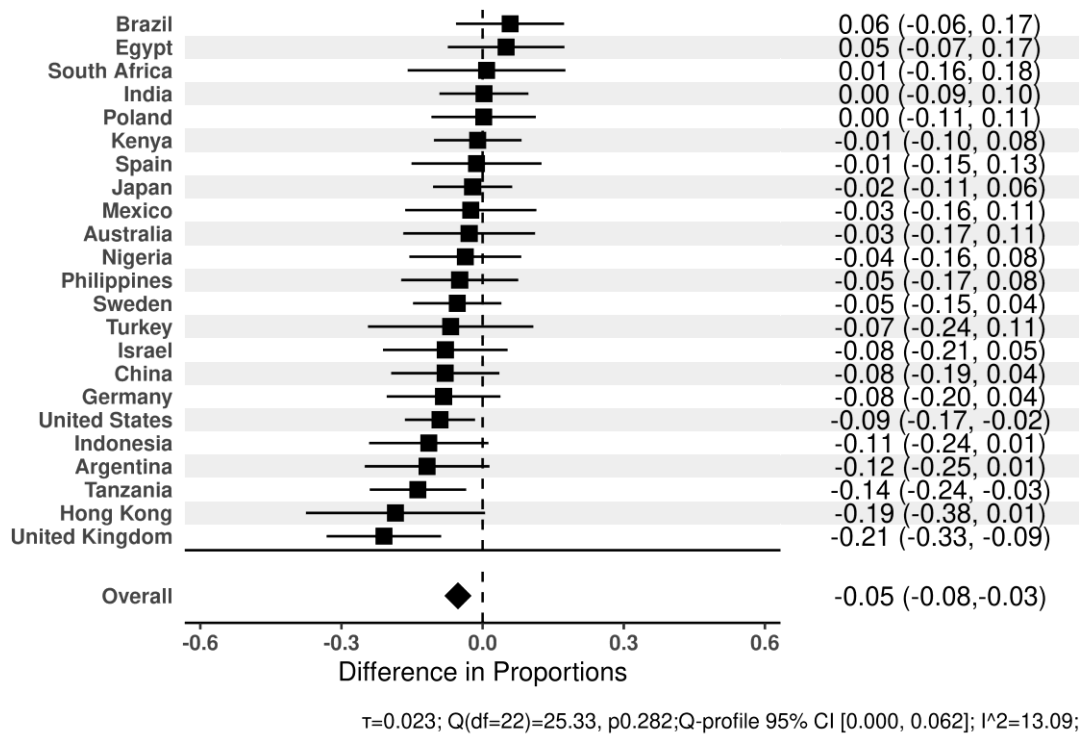

Figure S94. Forest plot for `Employment status` - `(Ref: None of these/other)  
Student`

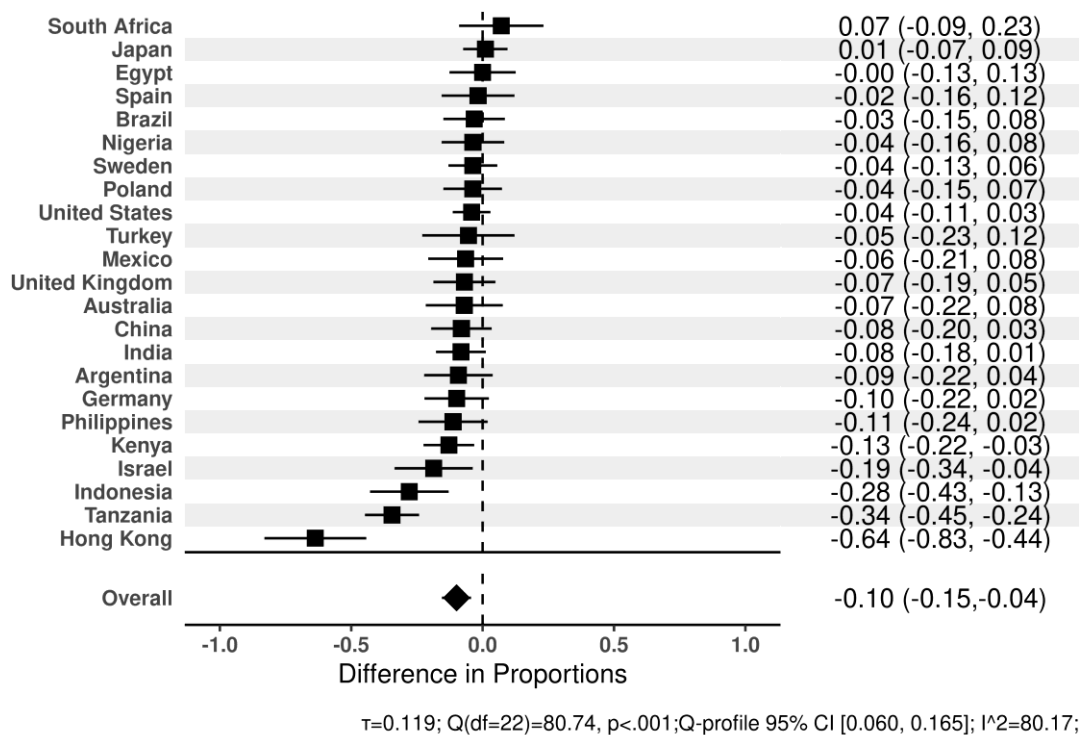

Figure S95. Forest plot for `Employment status` - `(Ref: None of these/other)  
Unemployed and looking for a job`

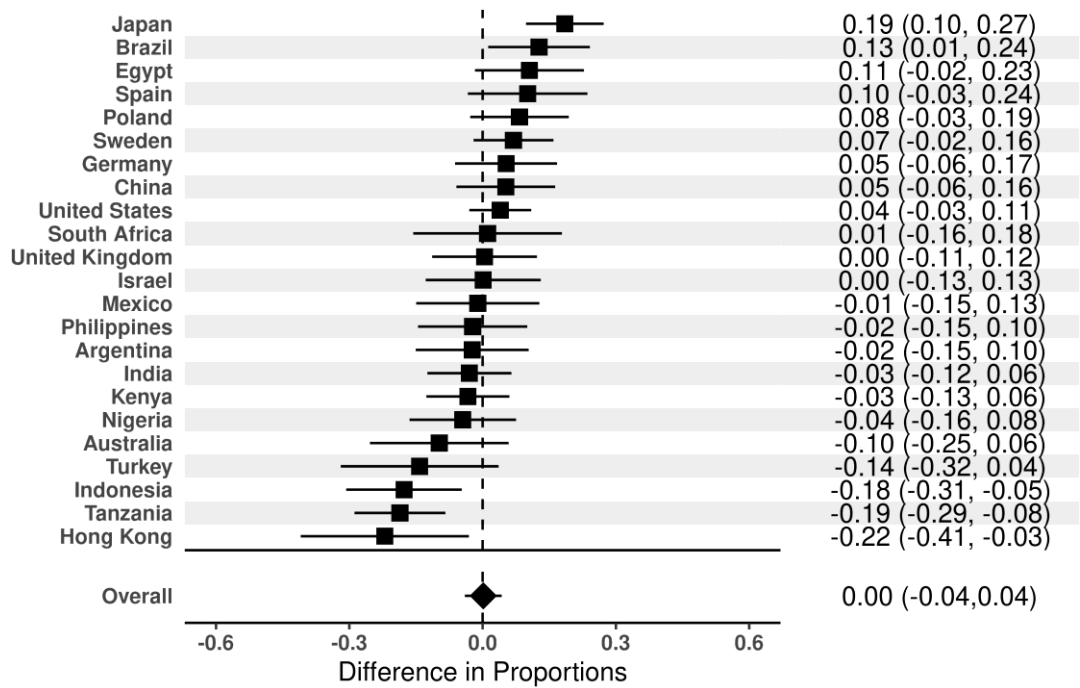

Figure S96. Forest plot for `Employment status` - `(Ref: Retired)  
Self-employed`

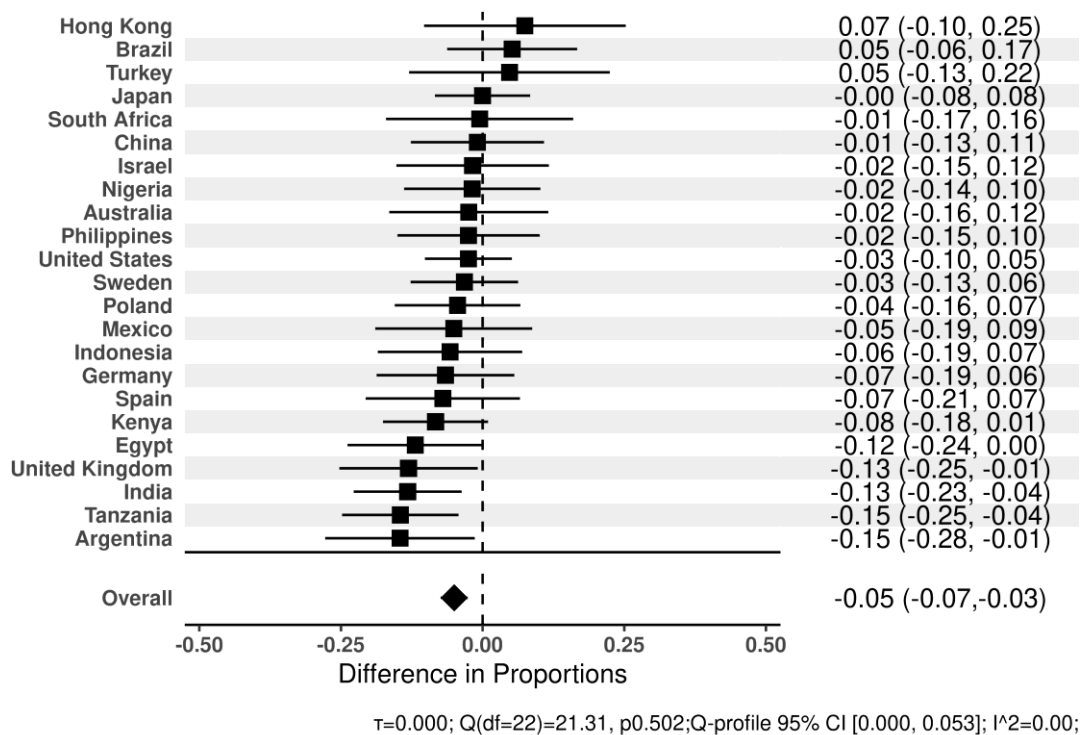

Figure S97. Forest plot for `Employment status` - `(Ref: Retired) Student`

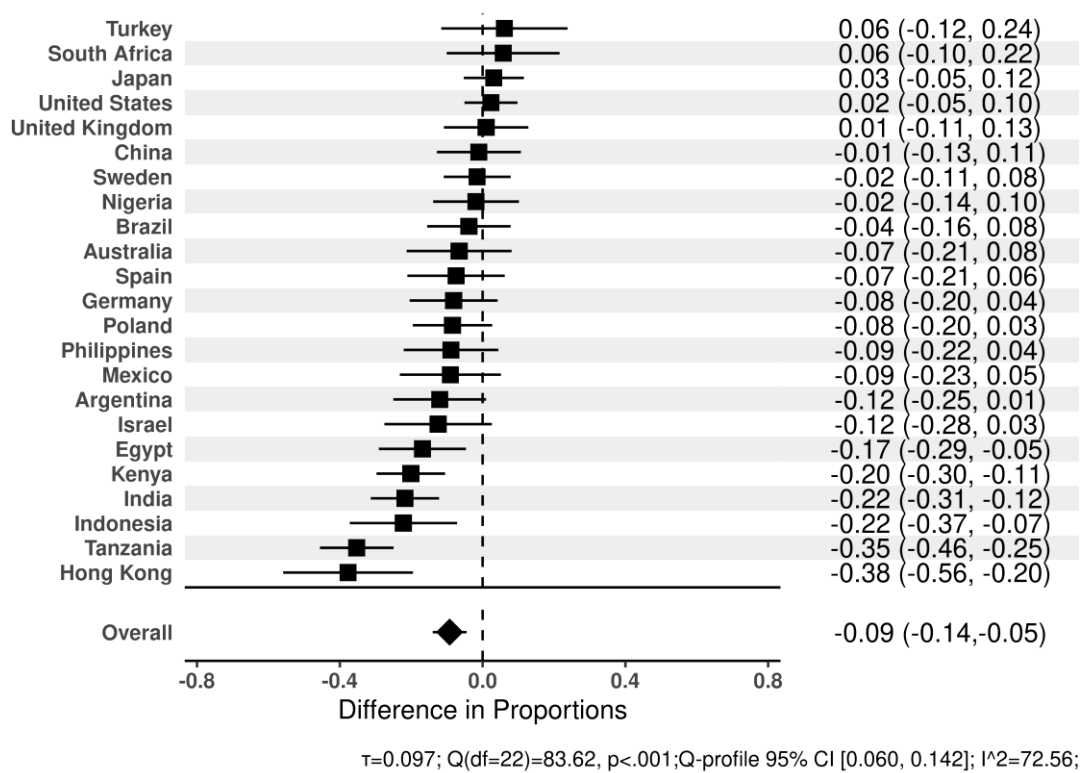

Figure S98. Forest plot for `Employment status` - `(Ref: Retired) Unemployed and looking for a job`

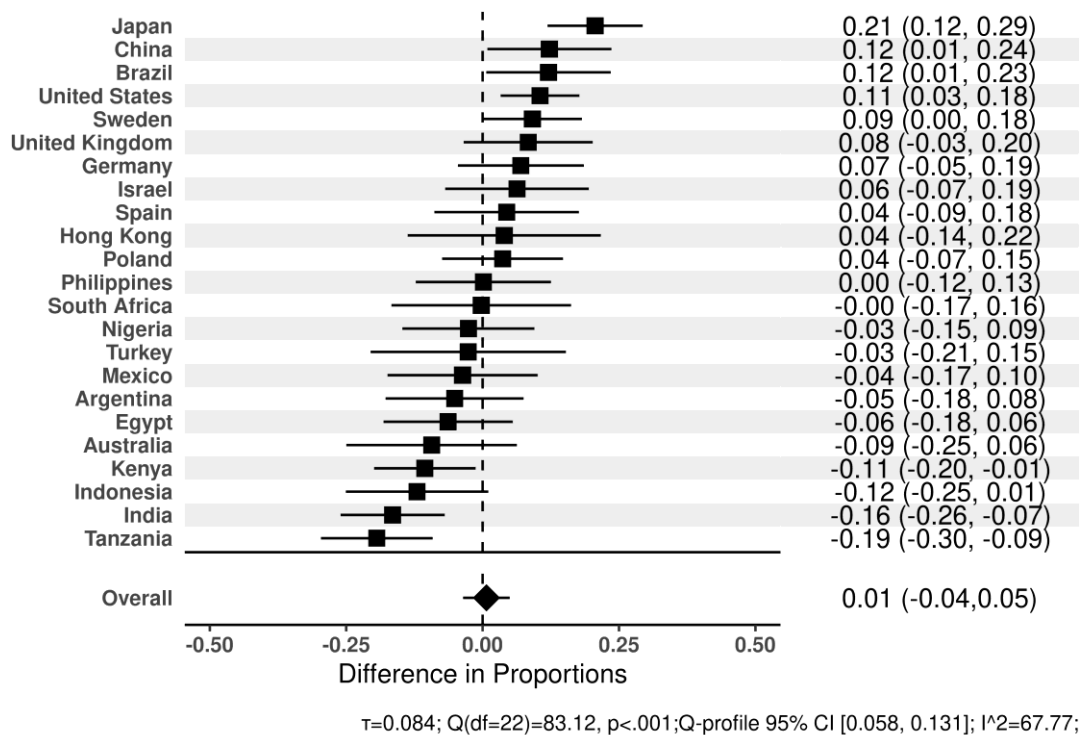

Figure S99. Forest plot for `Employment status` - `(Ref: Self-employed)  
Student`

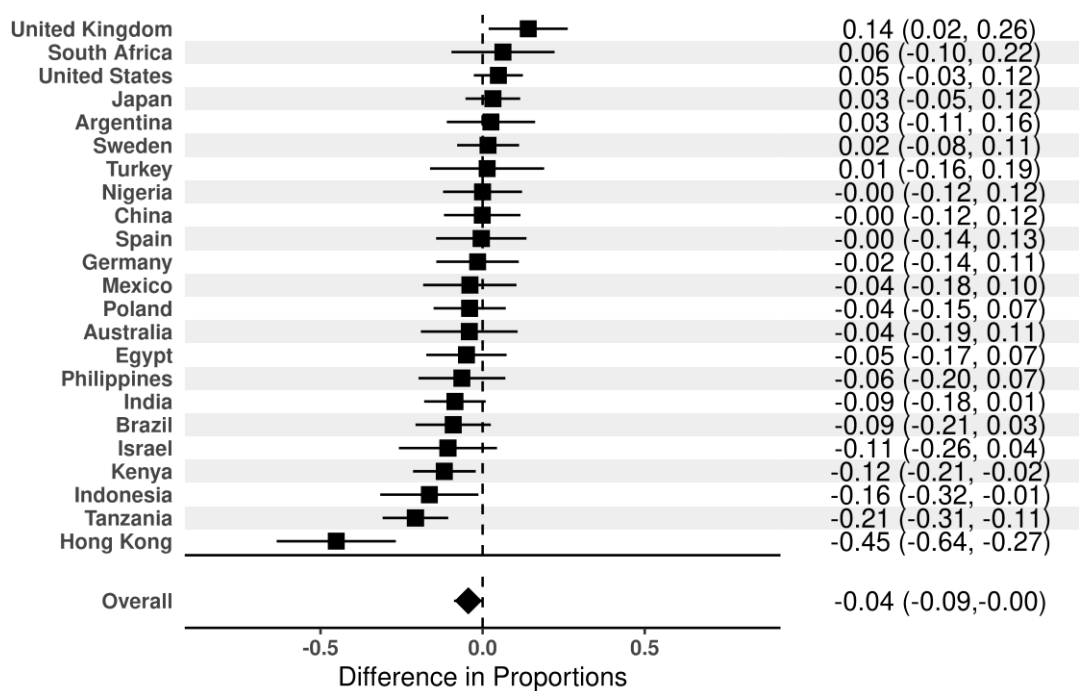

$\tau=0.087$ ;  $Q(df=22)=59.18$ ,  $p<.001$ ; Q-profile 95% CI [0.038, 0.126];  $I^2=67.50$ ;

Figure S100. Forest plot for `Employment status` - `(Ref: Self-employed)  
Unemployed and looking for a job`

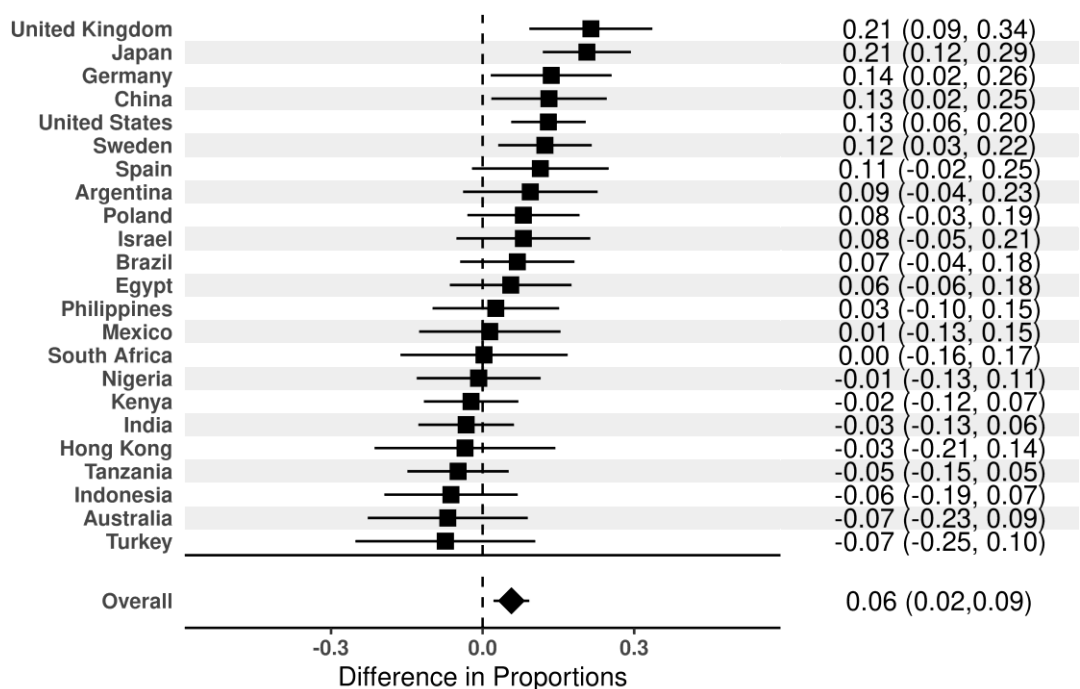

$\tau=0.061$ ;  $Q(df=22)=48.93$ ,  $p<.001$ ; Q-profile 95% CI [0.032, 0.101];  $I^2=51.84$ ;

Figure S101. Forest plot for `Employment status` - `(Ref: Student) Unemployed and looking for a job`

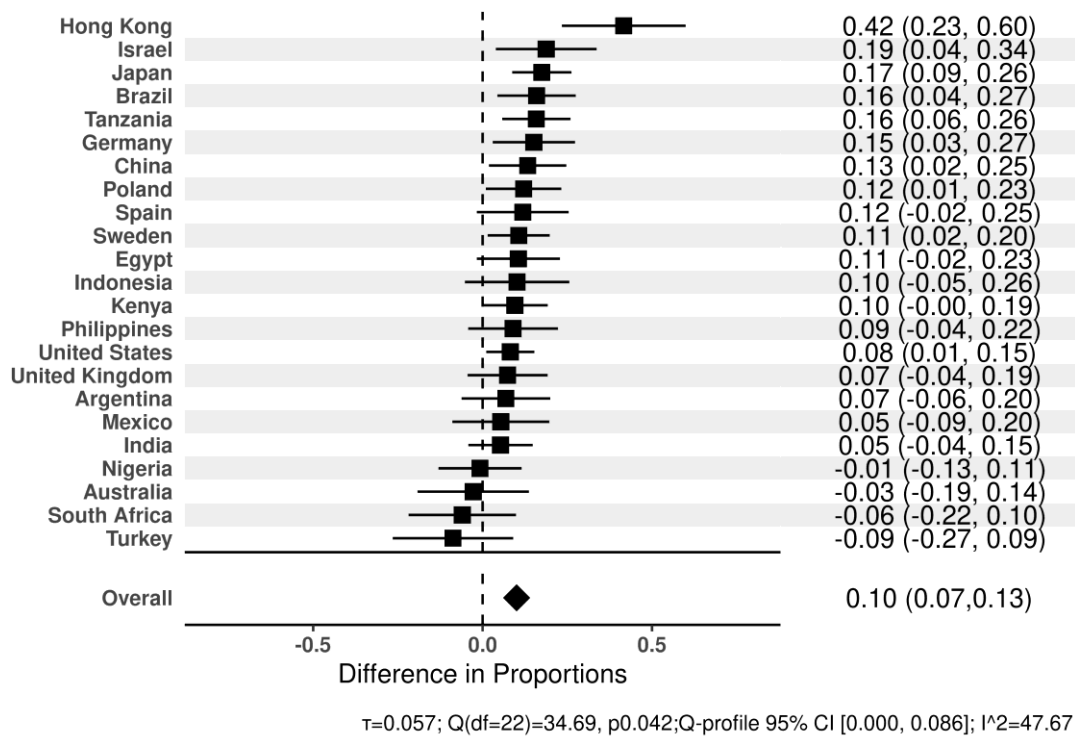

Figure S102. Forest plot for `Religious service attendance` - `(Ref: Never) A few times a year`

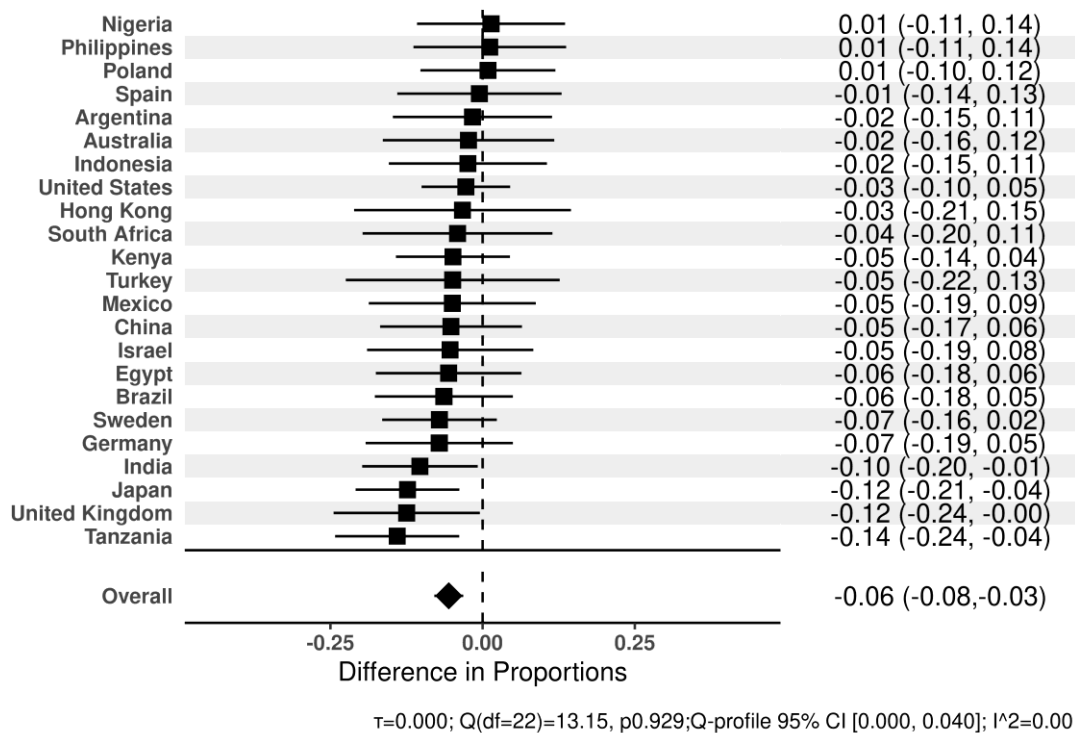

Figure S103. Forest plot for `Religious service attendance`-` (Ref: Never)  
>1/week`

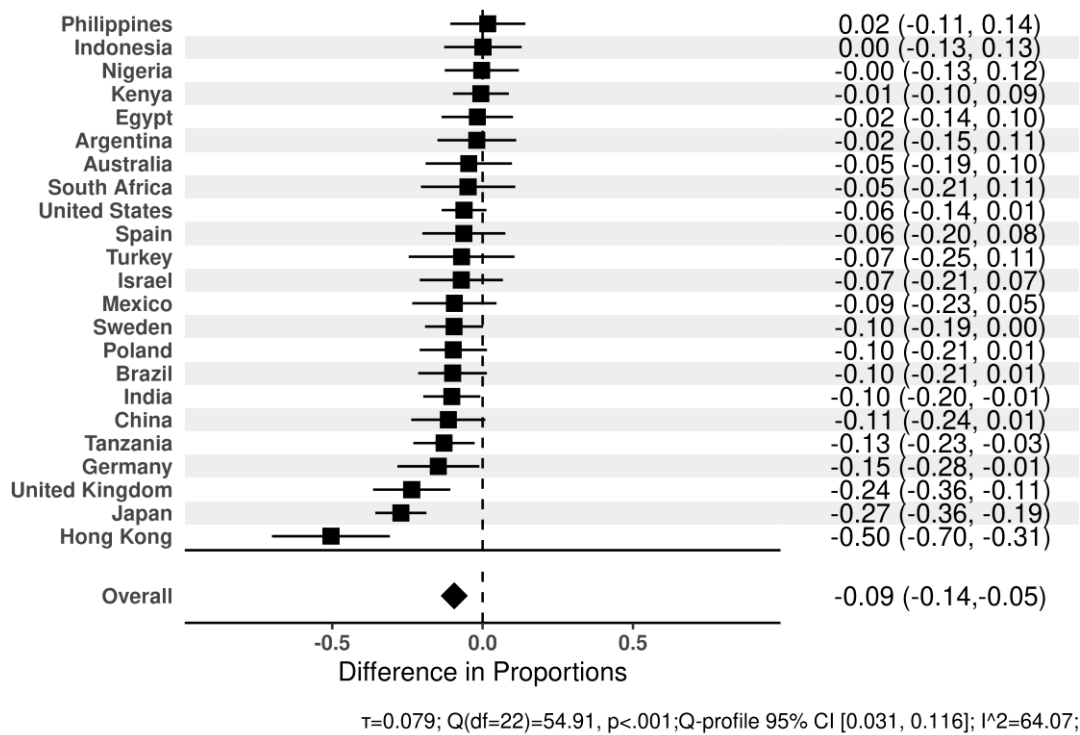

Figure S104. Forest plot for `Religious service attendance`-` (Ref: Never)  
1/week`

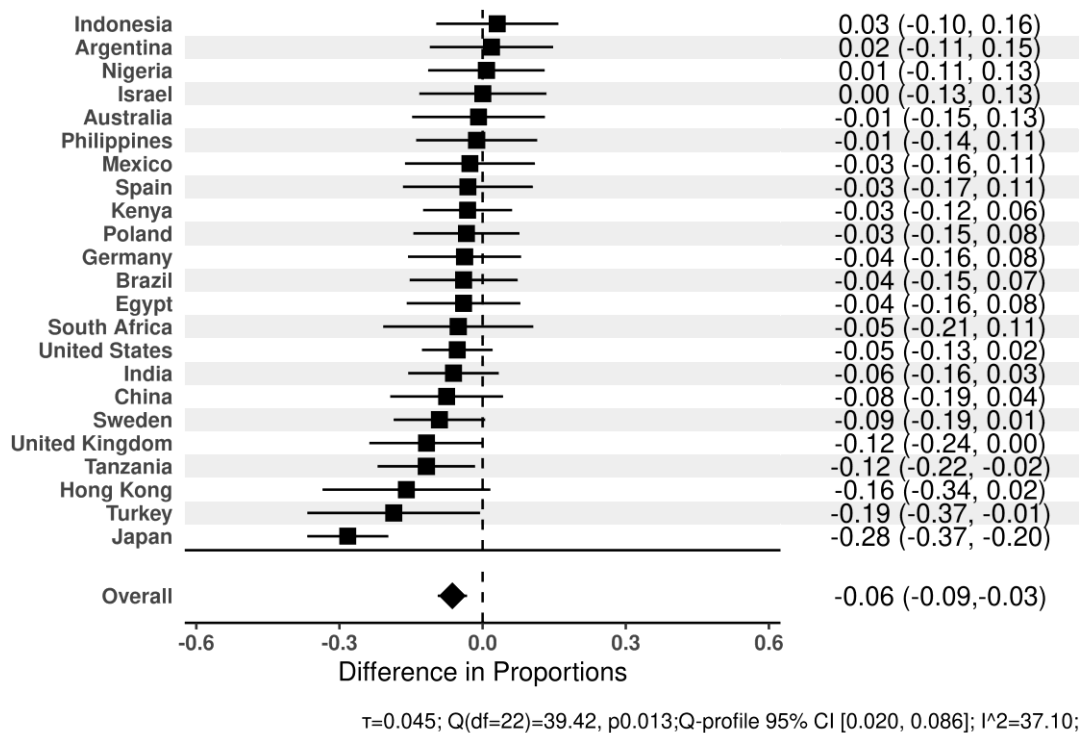

Figure S105. Forest plot for 'Religious service attendance' - (Ref: Never) 1-3/month`

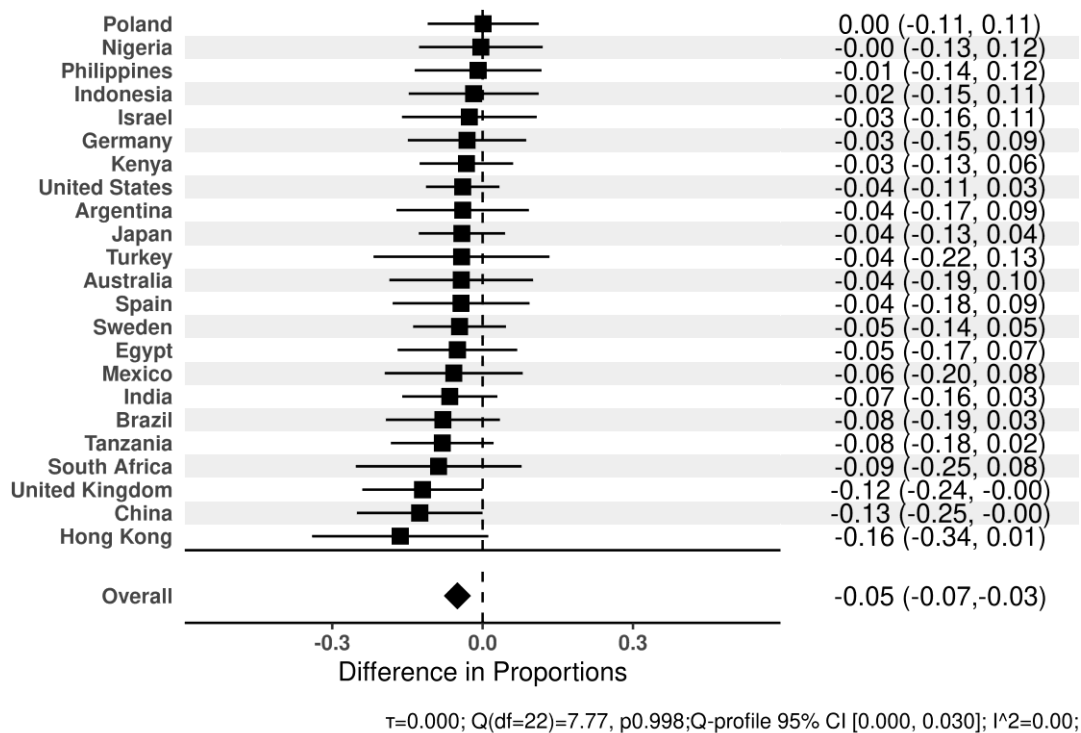

Figure S106. Forest plot for 'Religious service attendance' - (Ref: A few times a year) >1/week`

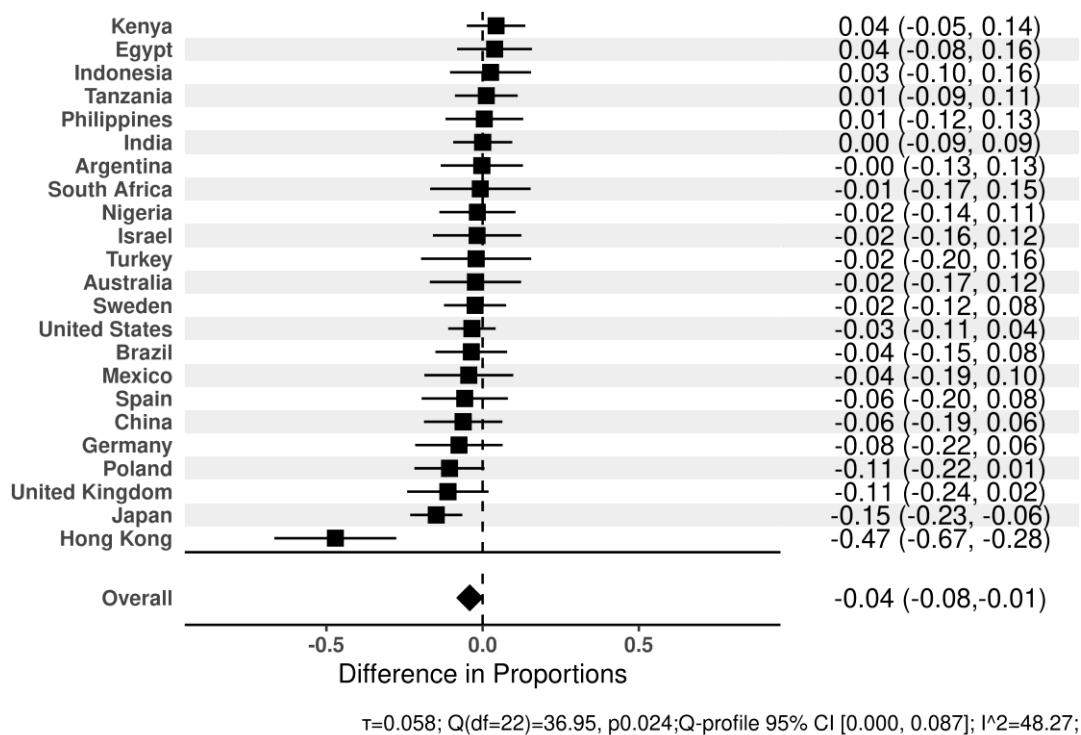

Figure S107. Forest plot for 'Religious service attendance' - (Ref: A few times a year) 1/week

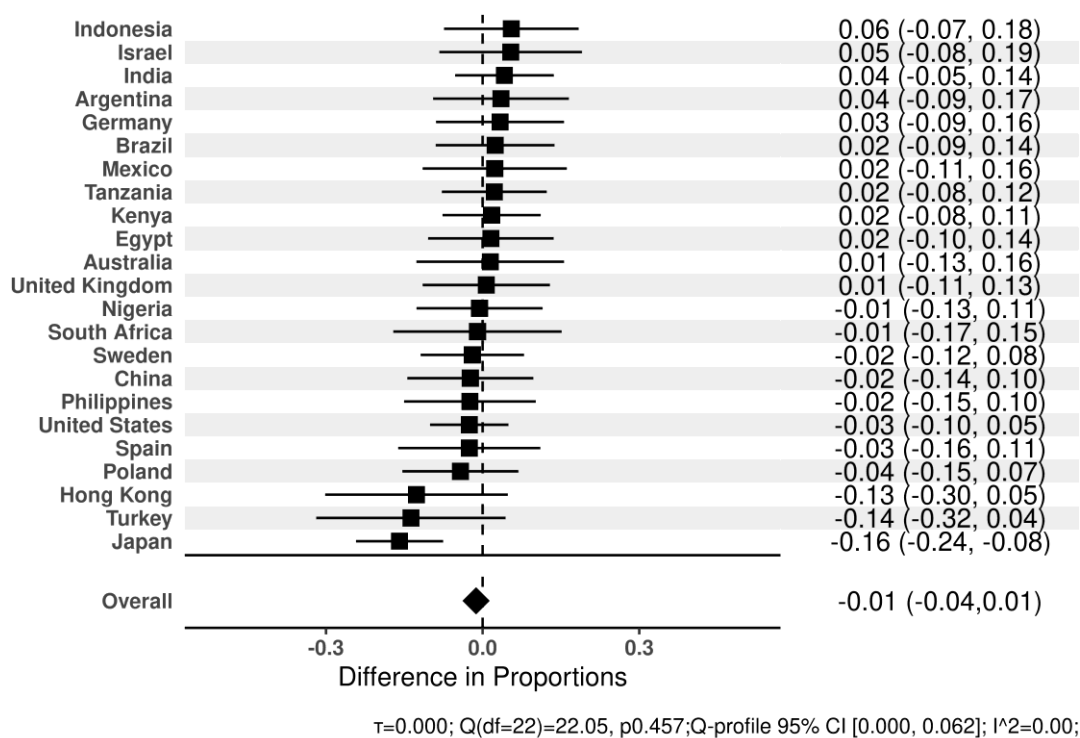

Figure S108. Forest plot for 'Religious service attendance' - (Ref: A few times a year) 1-3/month

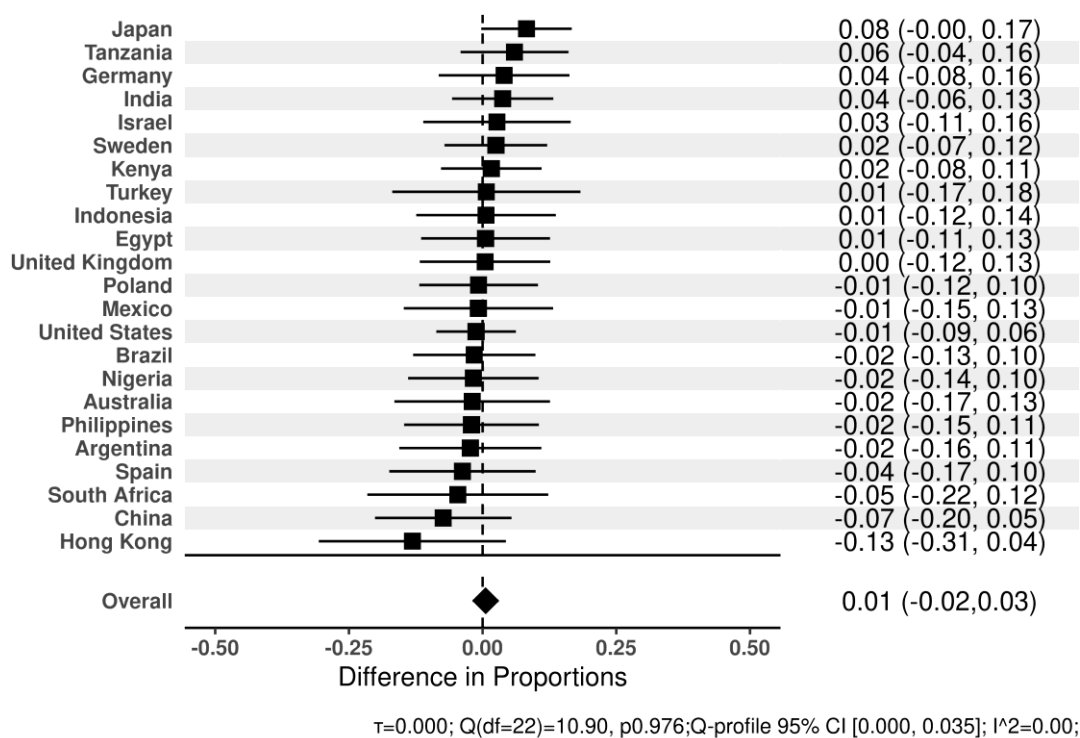

Figure S109. Forest plot for `Religious service attendance`-` (Ref: >1/week)  
1/week`

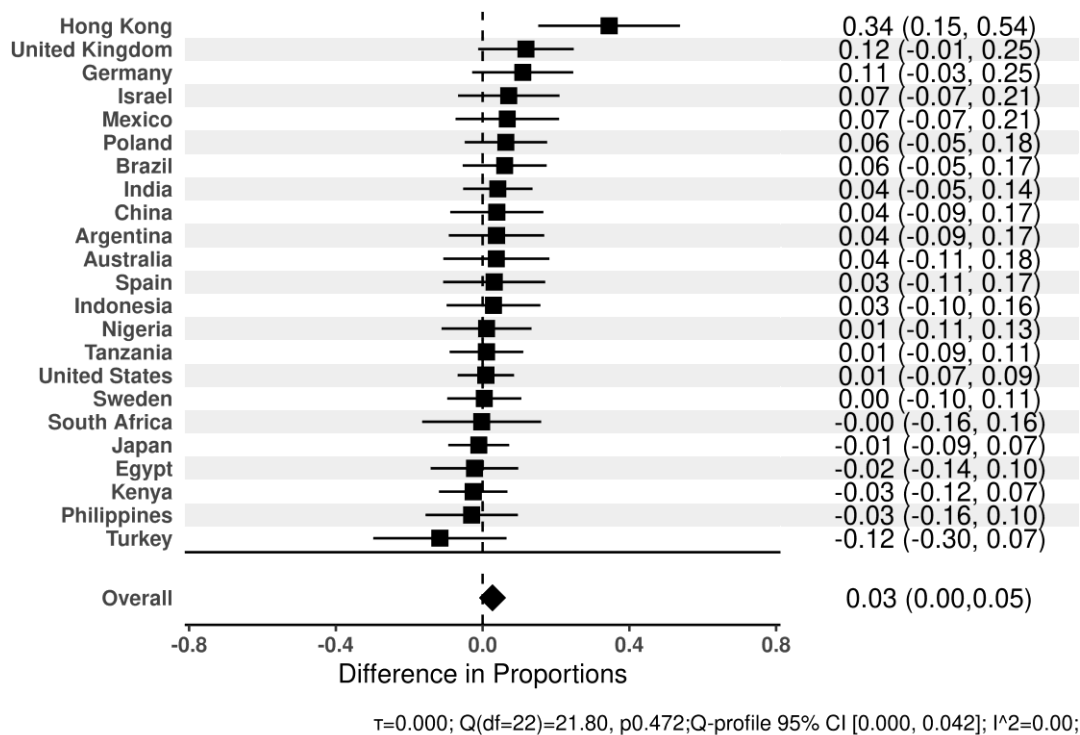

Figure S110. Forest plot for `Religious service attendance`-` (Ref: >1/week)  
1-3/month`

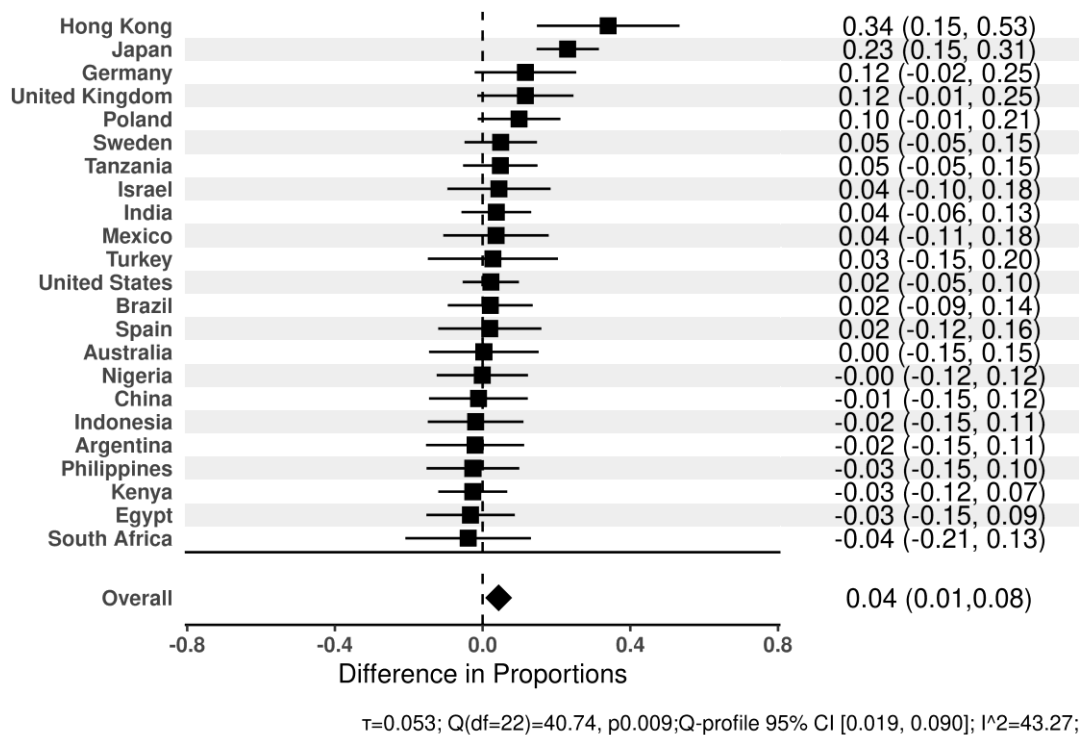

Figure S111. Forest plot for `Religious service attendance`-` (Ref: 1/week)  
1-3/month`

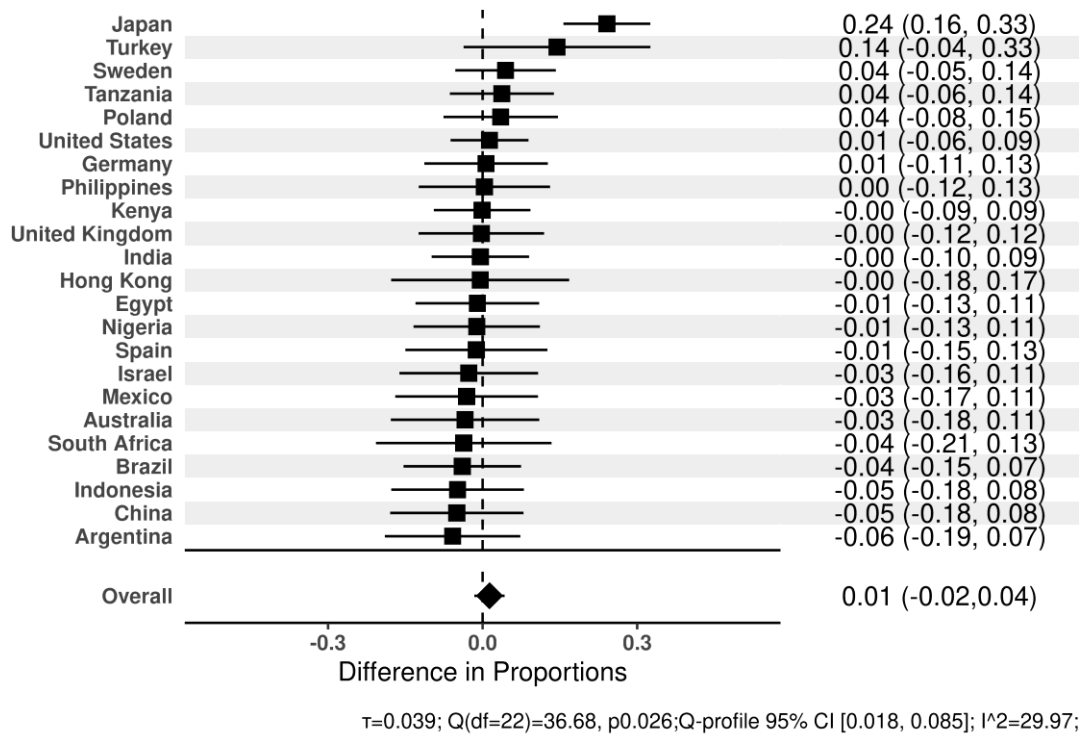

Figure S112. Forest plot for `Education`-` (Ref: 9-15 years) 16+ years`

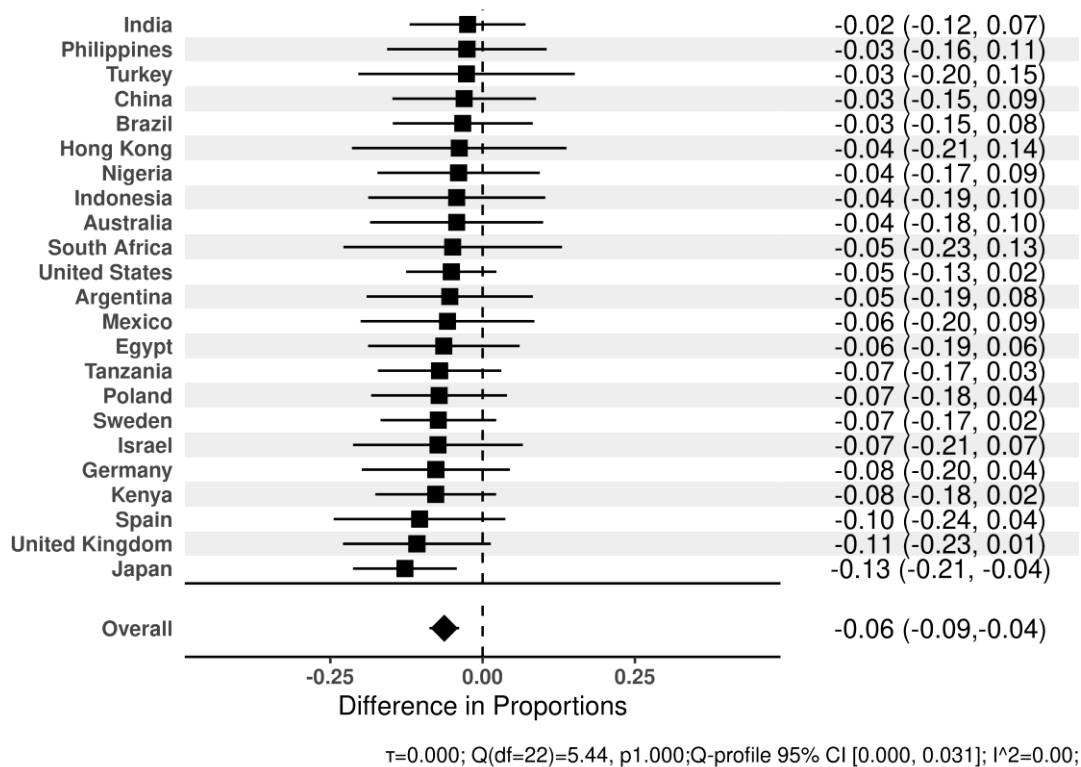

Figure S113. Forest plot for `Education`- `(Ref: 9-15 years) Up to 8 years`

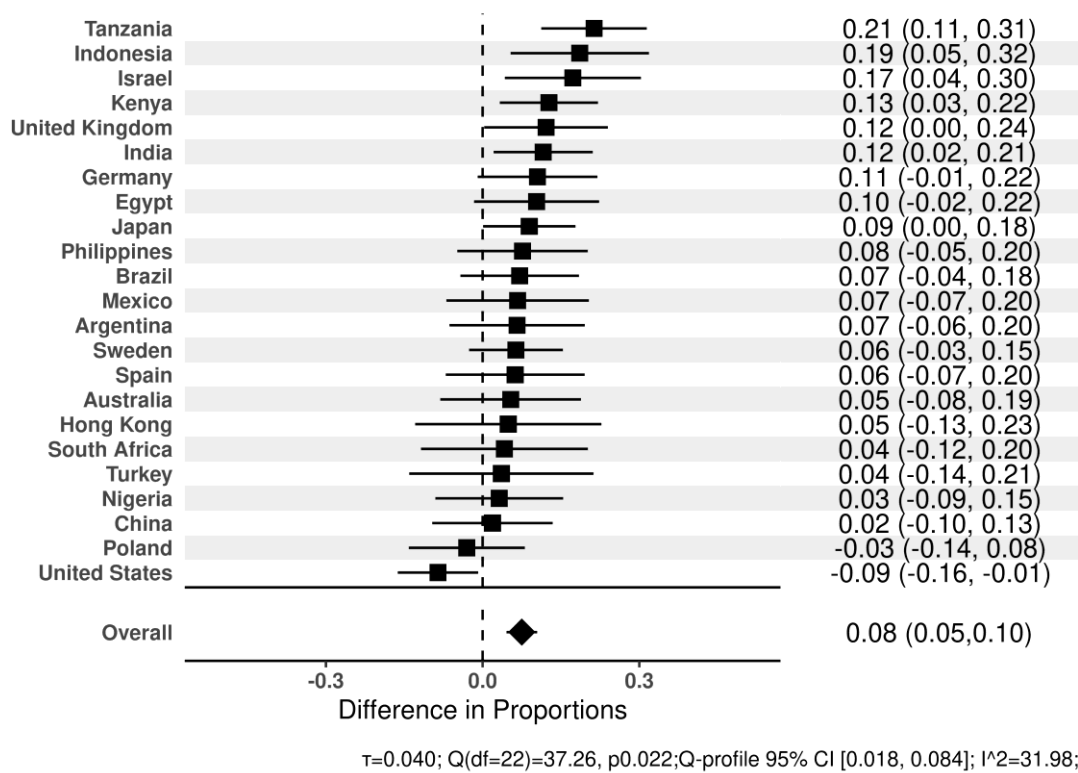

Figure S114. Forest plot for `Education`- `(Ref: 16+ years) Up to 8 years`

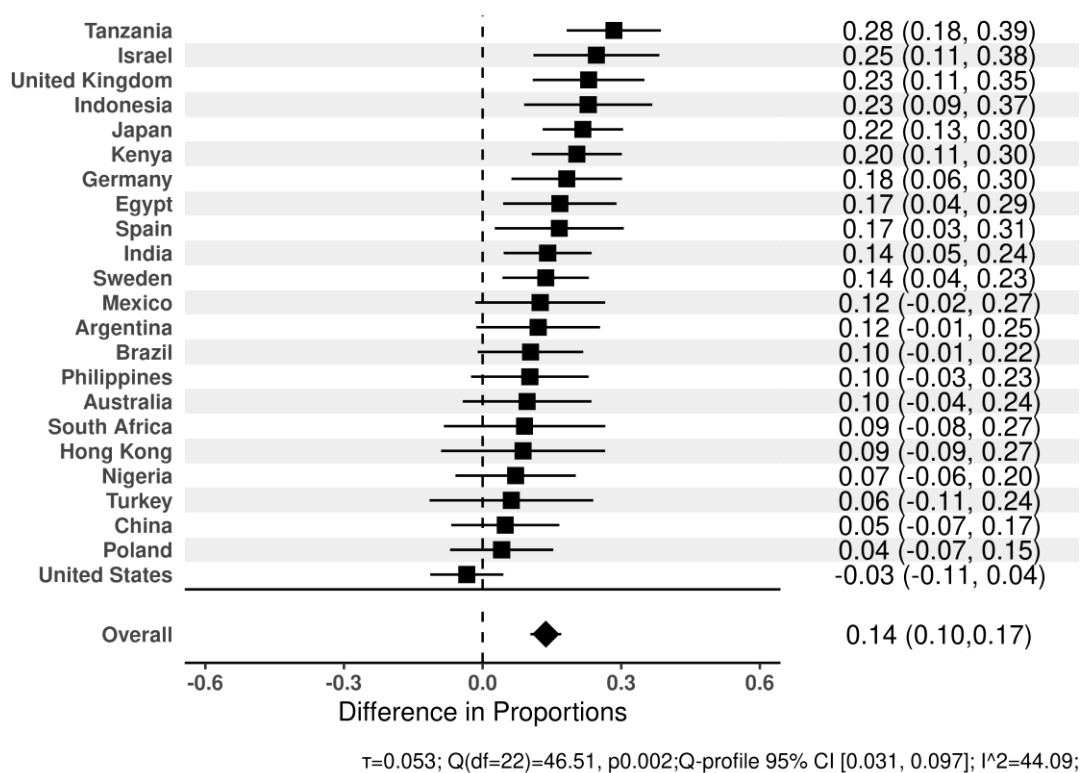

Figure S115. Forest plot for `Immigration status`-`(Ref: Born in this country) Born in another country`

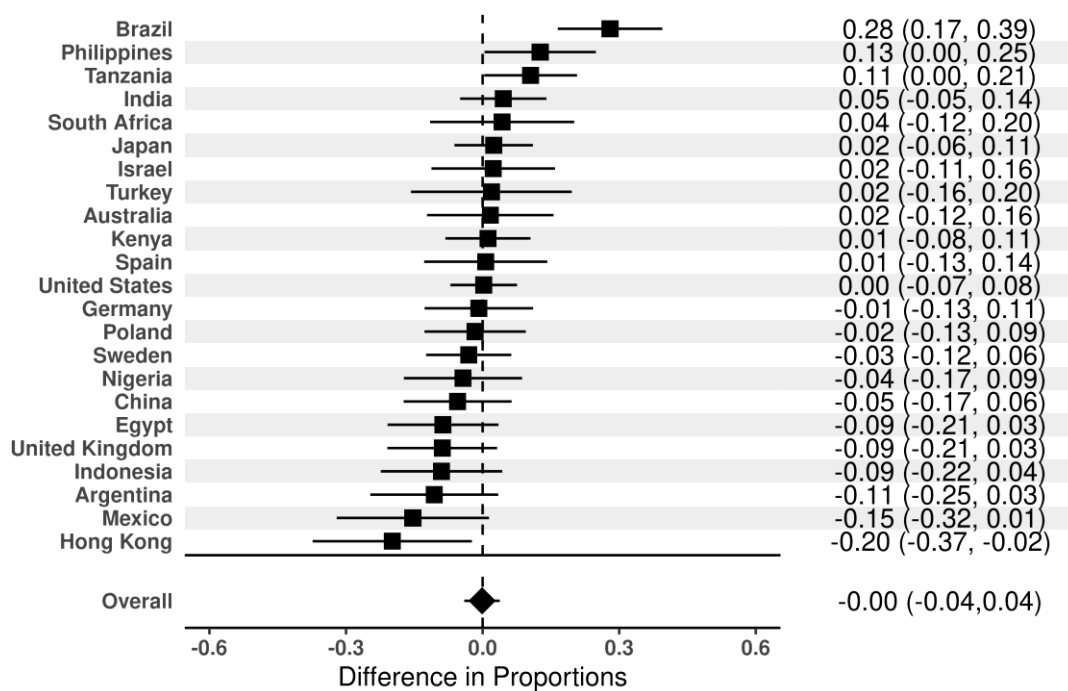

$\tau=0.072$ ;  $Q(df=22)=50.55$ ,  $p<.001$ ; Q-profile 95% CI [0.031, 0.111];  $I^2=59.97$ ;

### Forest Plots (Childhood)

Figure S1. Forest plot of the effects of Relationship with your mother growing up Very good/somewhat good (Ref: Very bad/somewhat bad) predicting experienced beauty

Relationship with your mother growing up (Very good/somewhat good)  
predicting experienced beauty  
(Ref: Very bad/somewhat bad)

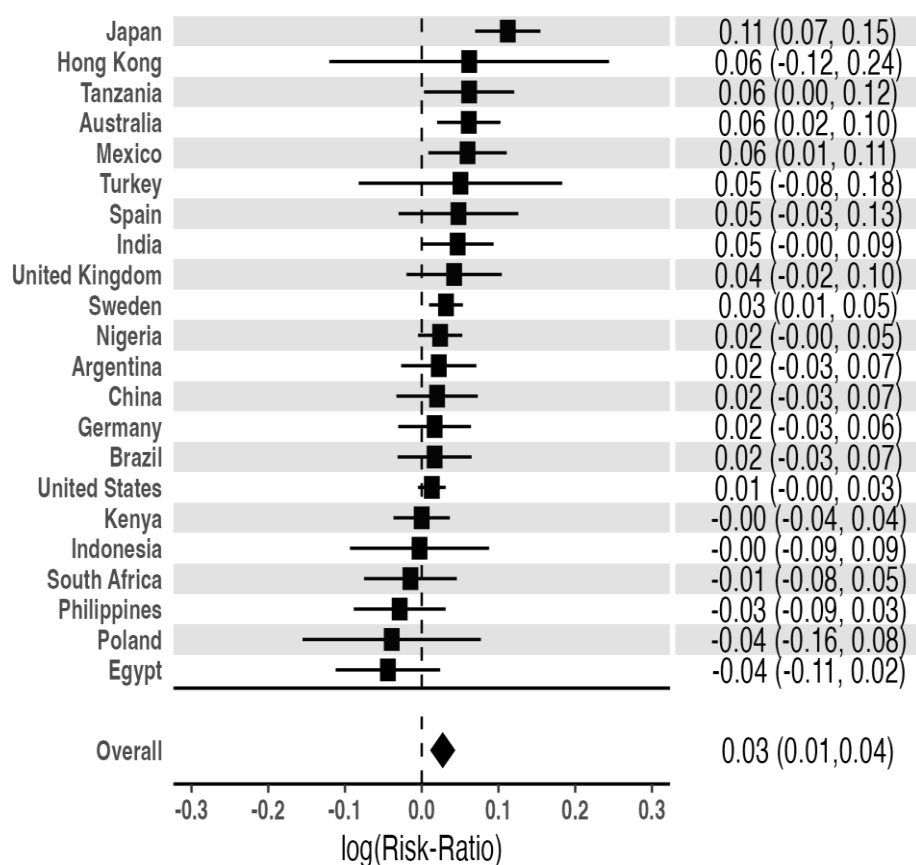

$\tau = 0.022$ ; Q-profile 95% CI [0.000, 0.040]; Q(df=21)=38.36,  $p=1.17e-02$ ;  $I^2=48.40$ ;  
Excluded countries: Israel

Figure S2. Forest plot of the effects of Relationship with your father growing up Very good/somewhat good (Ref: Very bad/somewhat bad) predicting experienced beauty

Relationship with your father growing up (Very good/somewhat good)  
predicting experienced beauty

(Ref: Very bad/somewhat bad)

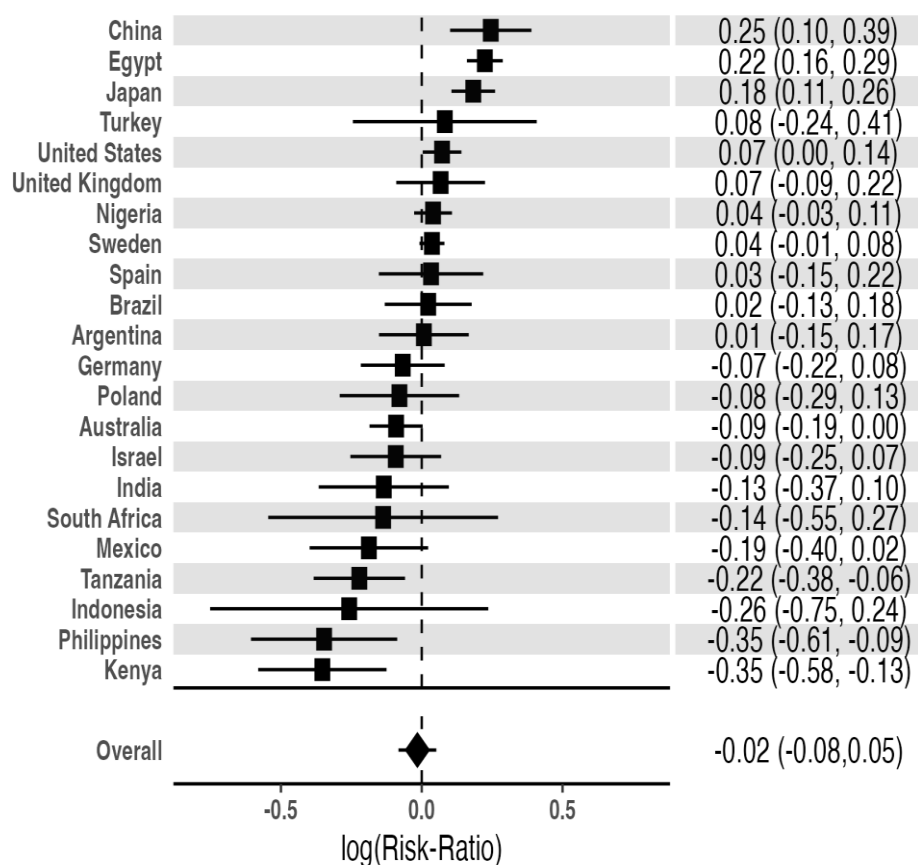

$\tau = 0.134$ ; Q-profile 95% CI [0.084, 0.200]; Q(df=21)=105.19,  $p=3.45e-13$ ;  $I^2=84.41$ ;

Excluded countries: Hong Kong

Figure S3. Forest plot of the effects of Parents married to each other when you were around 12 years old One or both of them had died (Ref: Parents married) predicting experienced beauty

Parents married to each other when you were around 12 years old (One or both of them had died) predicting experienced beauty

(Ref: Parents married)

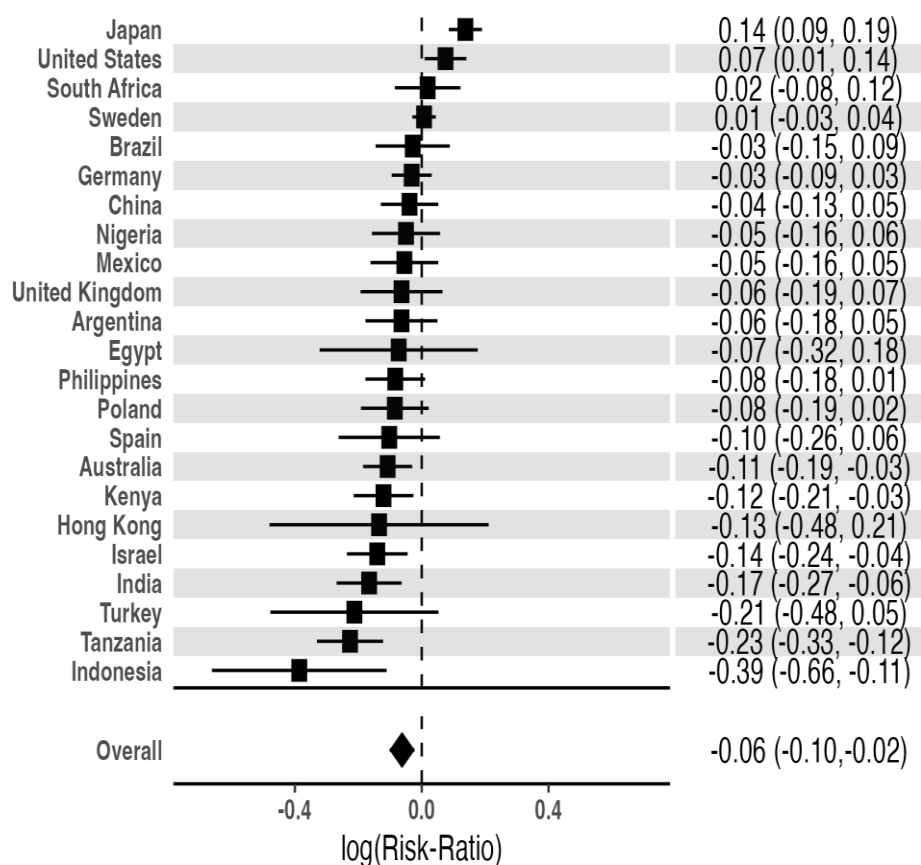

$\tau = 0.076$ ; Q-profile 95% CI [0.051, 0.117]; Q(df=22)=98.91, p=9.98e-12;  $I^2=73.47$ ;

Figure S4. Forest plot of the effects of Parents married to each other when you were around 12 years old Parents were divorced (Ref: Parents married) predicting experienced beauty

Parents married to each other when you were around 12 years old  
(Parents were divorced) predicting experienced beauty  
(Ref: Parents married)

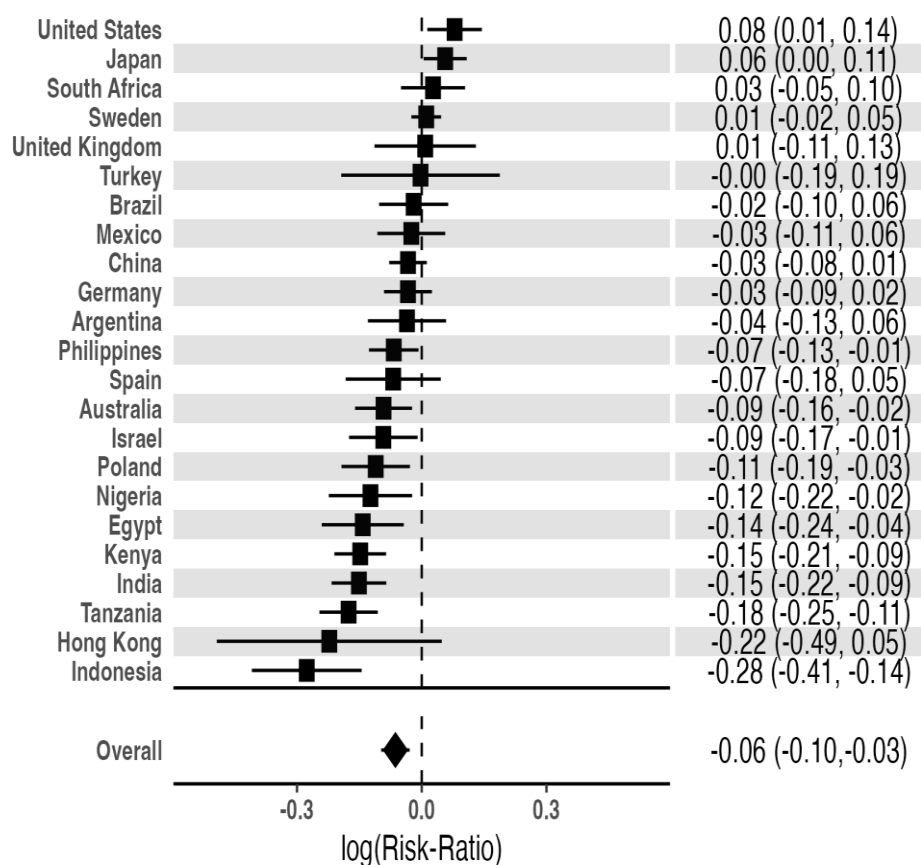

$\tau = 0.071$ ; Q-profile 95% CI [0.045, 0.103]; Q(df=22)=102.75,  $p=2.12e-12$ ;  $I^2=79.18$ ;

Figure S5. Forest plot of the effects of Parents married to each other when you were around 12 years old Parents were never married (Ref: Parents married) predicting experienced beauty

Parents married to each other when you were around 12 years old  
(Parents were never married) predicting experienced beauty  
(Ref: Parents married)

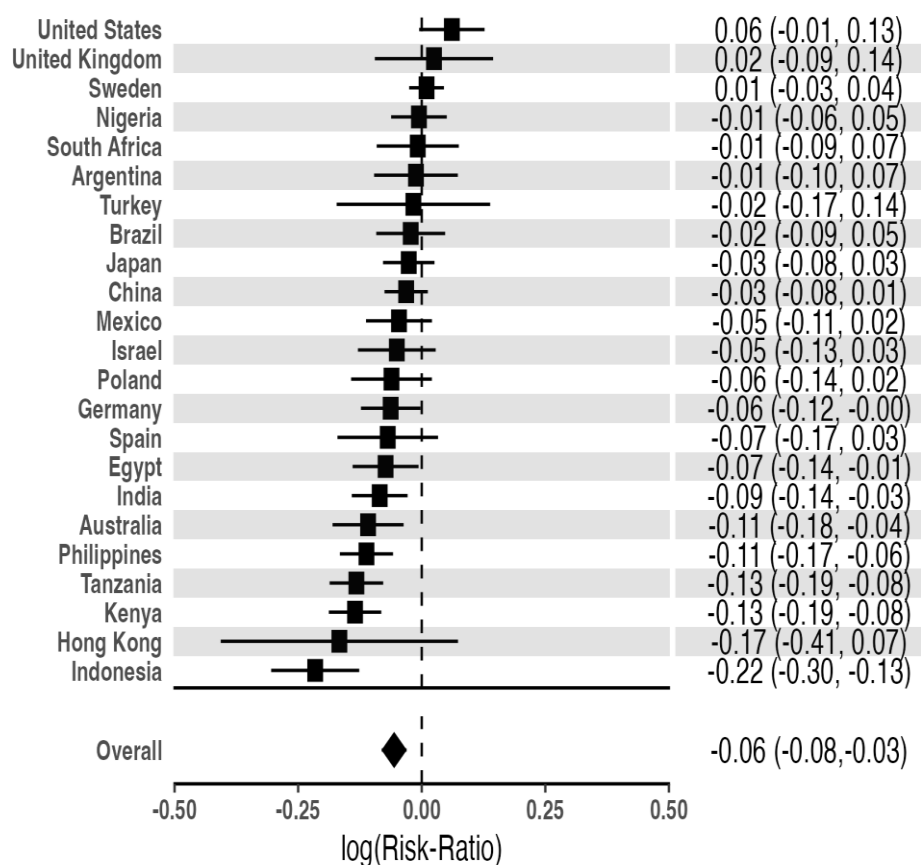

$\tau = 0.049$ ; Q-profile 95% CI [0.030, 0.074];  $Q(df=22)=72.58$ ,  $p=2.58e-07$ ;  $I^2=68.56$ ;

Figure S6. Forest plot of the effects of Parents married to each other when you were around 12 years old Unsure  
(Ref: Parents married) predicting experienced beauty

Parents married to each other when you were around 12 years old  
(Unsure) predicting experienced beauty  
(Ref: Parents married)

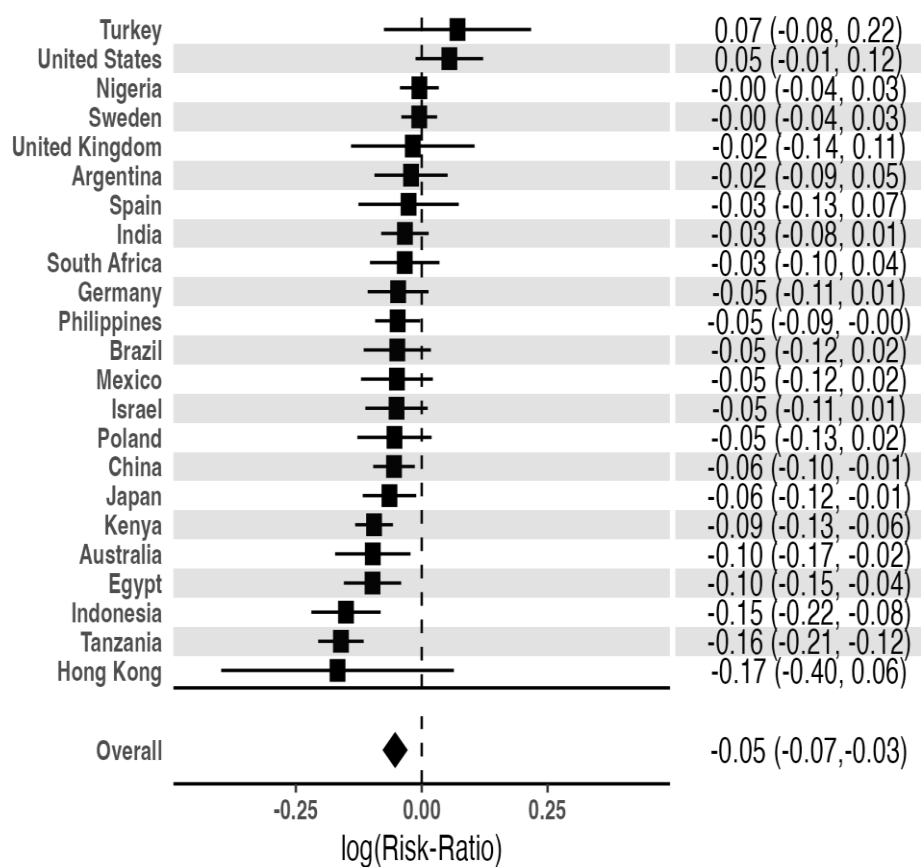

$\tau = 0.040$ ; Q-profile 95% CI [0.024, 0.062];  $Q(df=22)=67.12$ ,  $p=1.86e-06$ ;  $I^2=65.19$ ;

Figure S7. Forest plot of the effects of Feelings about familys household income when growing up Found it difficult (Ref: Got by) predicting experienced beauty

# Feelings about familys household income when growing up (Found it difficult) predicting experienced beauty

(Ref: Got by)

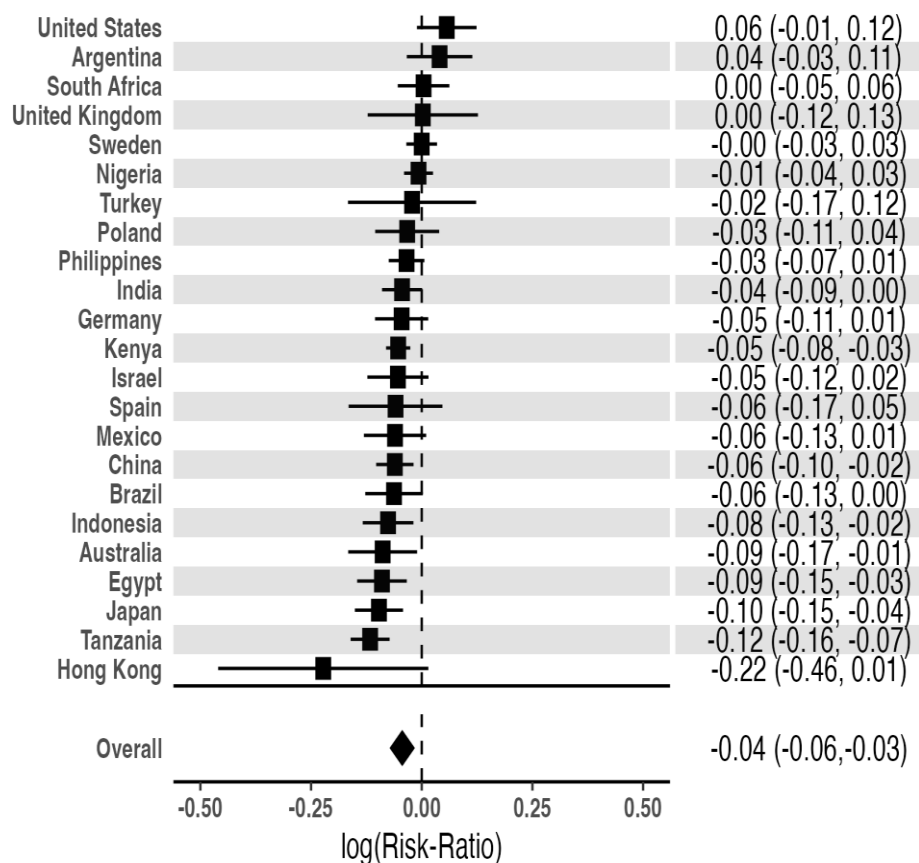

$\tau = 0.032$ ; Q-profile 95% CI [0.016, 0.052]; Q(df=22)=51.03, p=4.25e-04;  $I^2=58.03$ ;

Figure S8. Forest plot of the effects of Feelings about familys household income when growing up Found it very difficult (Ref: Got by) predicting experienced beauty

Feelings about familys household income when growing up (Found it ver  
difficult) predicting experienced beauty

(Ref: Got by)

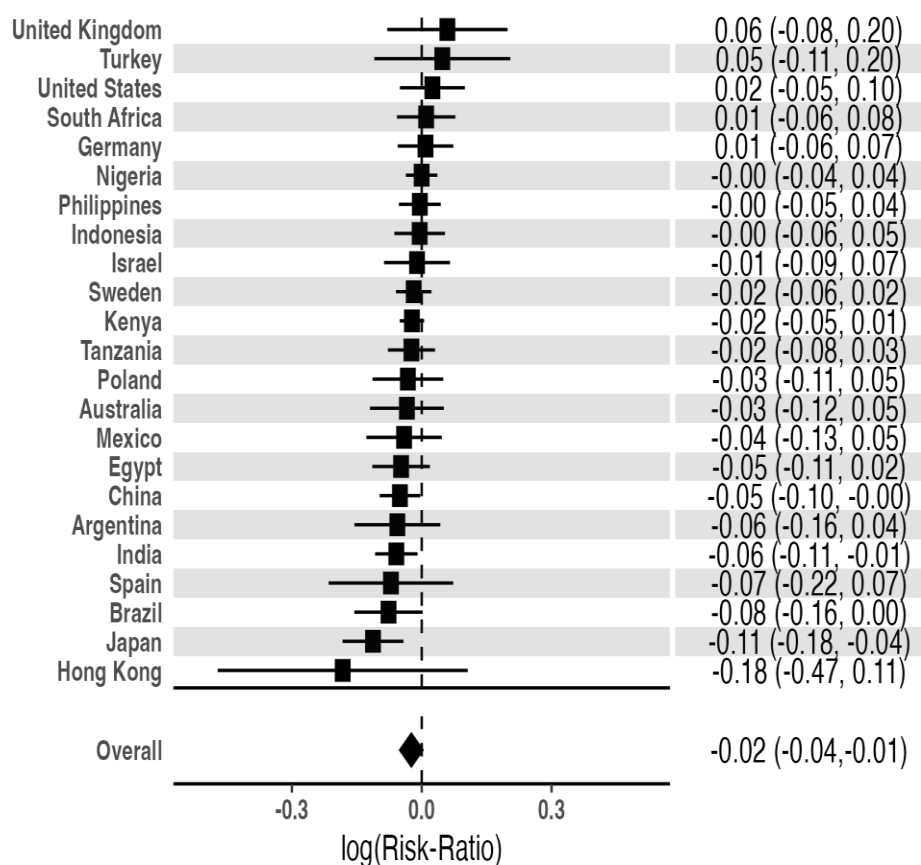

$\tau = 0.000$ ; Q-profile 95% CI [0.000, 0.027];  $Q(df=22)=22.30$ ,  $p=4.42e-01$ ;  $I^2=0.00$ ;

Figure S9. Forest plot of the effects of Feelings about familys household income when growing up Lived comfortably (Ref: Got by) predicting experienced beauty

# Feelings about familys household income when growing up (Lived comfortably) predicting experienced beauty

(Ref: Got by)

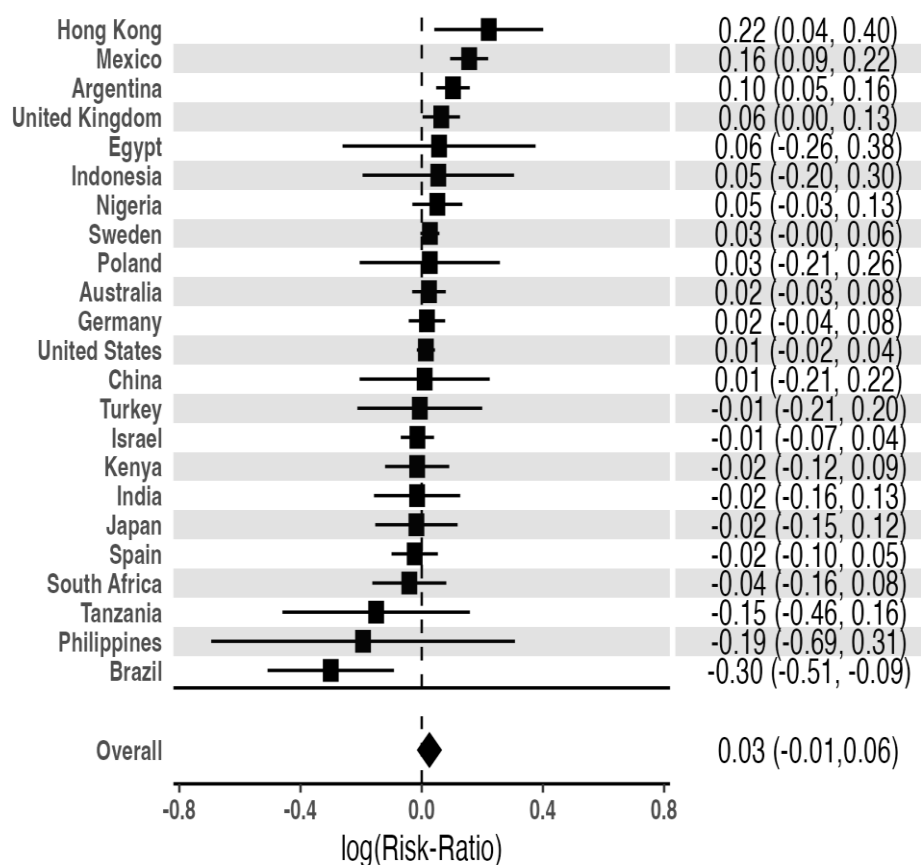

$\tau = 0.053$ ; Q-profile 95% CI [0.016, 0.084]; Q(df=22)=48.73, p=8.7e-04;  $I^2=66.72$ ;

Figure S10. Forest plot of the effects of Physically or sexually abused when growing up (Ref: No) predicting experienced beauty

Physically or sexually abused when growing up ( ) predicting  
experienced beauty

(Ref: No)

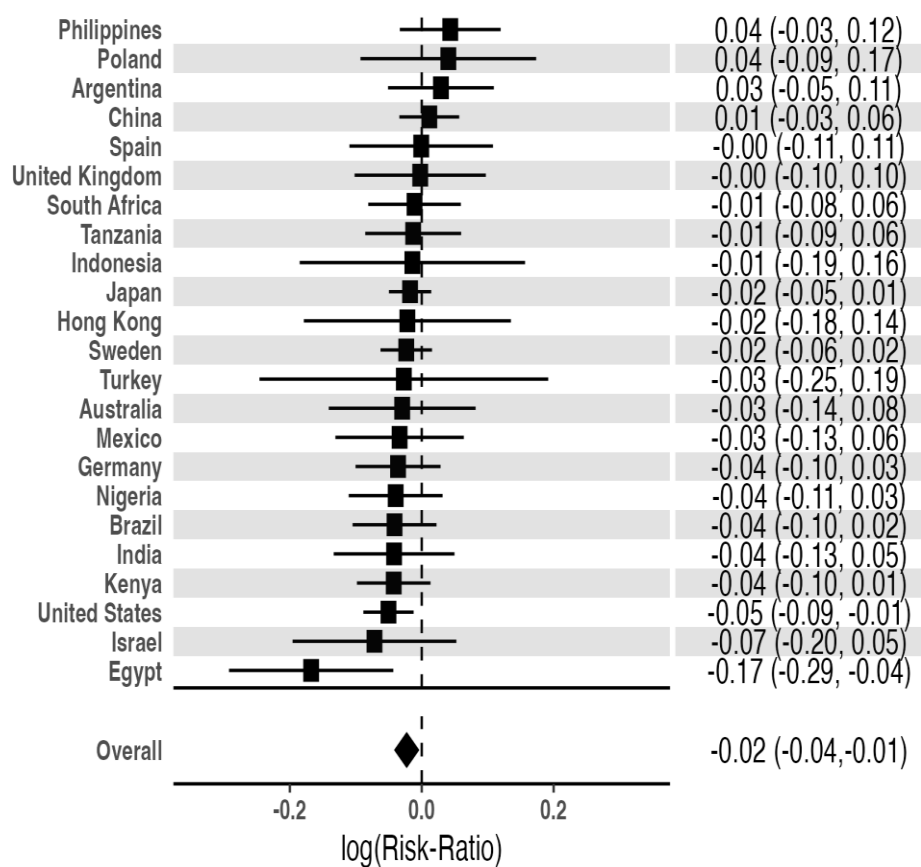

$\tau = 0.000$ ; Q-profile 95% CI [0.000, 0.026]; Q(df=22)=17.40, p=7.41e-01;  $I^2=0.00$ ;

Figure S11. Forest plot of the effects of Felt like an outsider in your family when growing up Yes (Ref: No) predicting experienced beauty

Felt like an outsider in your family when growing up (Yes) predicting experienced beauty

(Ref: No)

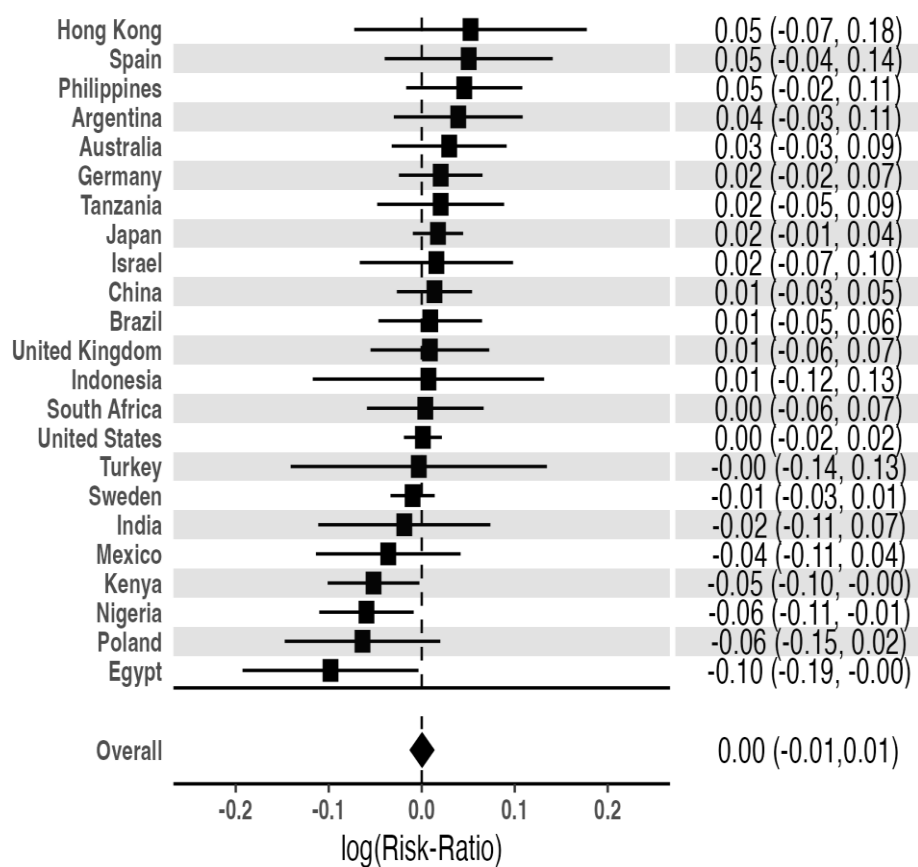

$\tau=0.013$ ; Q-profile 95% CI [0.000, 0.031]; Q(df=22)=27.09,  $p=2.08e-01$ ;  $I^2=21.69$ ;

Figure S12. Forest plot of the effects of Your health when growing up Excellent (Ref: Good) predicting experienced beauty

Your health when growing up (Excellent) predicting experienced beauty  
(Ref: Good)

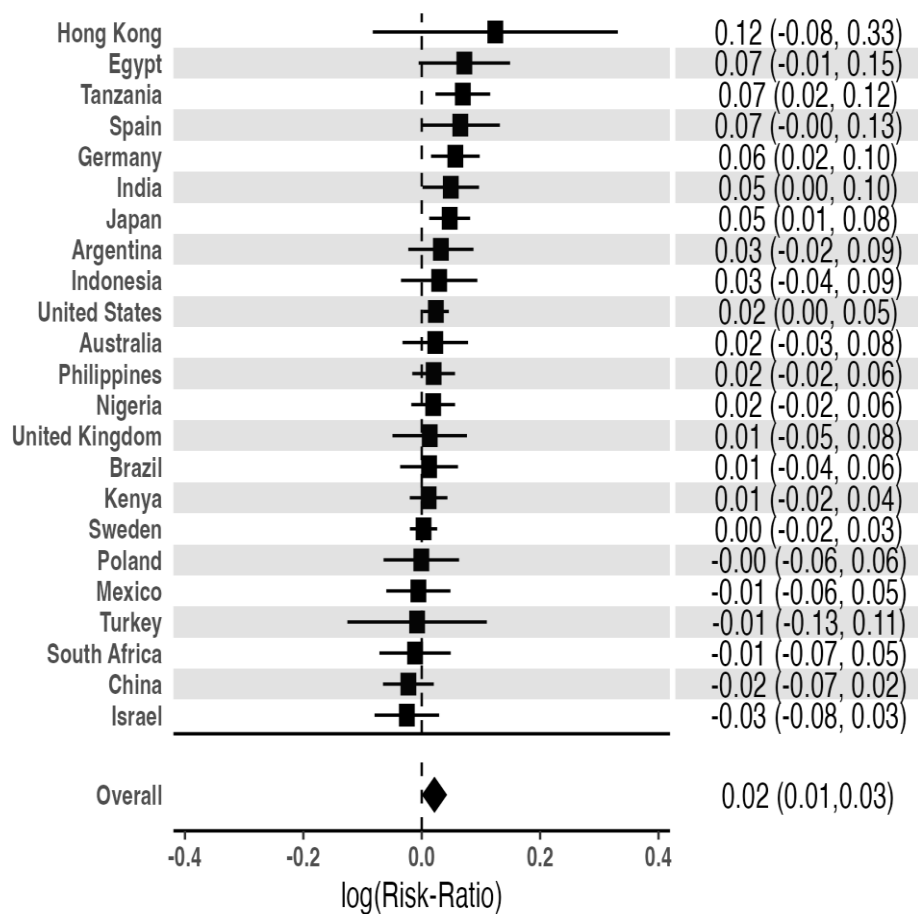

$\tau = 0.012$ ; Q-profile 95% CI [0.000, 0.027]; Q(df=22)=27.54,  $p = 1.91 \times 10^{-1}$ ;  $I^2 = 22.37$ ;

Figure S13. Forest plot of the effects of Your health when growing up Fair (Ref: Good) predicting experienced beauty

Your health when growing up (Fair) predicting experienced beauty  
(Ref: Good)

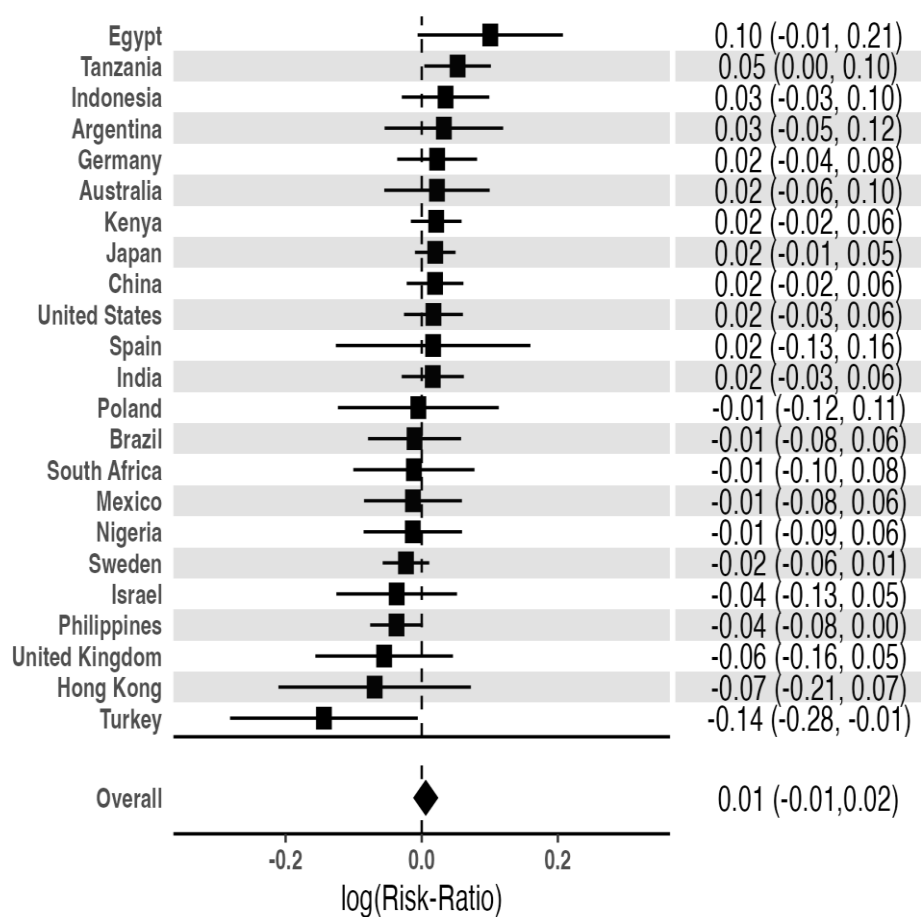

$\tau = 0.013$ ; Q-profile 95% CI [0.000, 0.032];  $Q(df=22)=26.93$ ,  $p=2.14e-01$ ;  $I^2=17.09$ ;

Figure S14. Forest plot of the effects of Your health when growing up Poor (Ref: Good) predicting experienced beauty

Your health when growing up (Poor) predicting experienced beauty  
(Ref: Good)

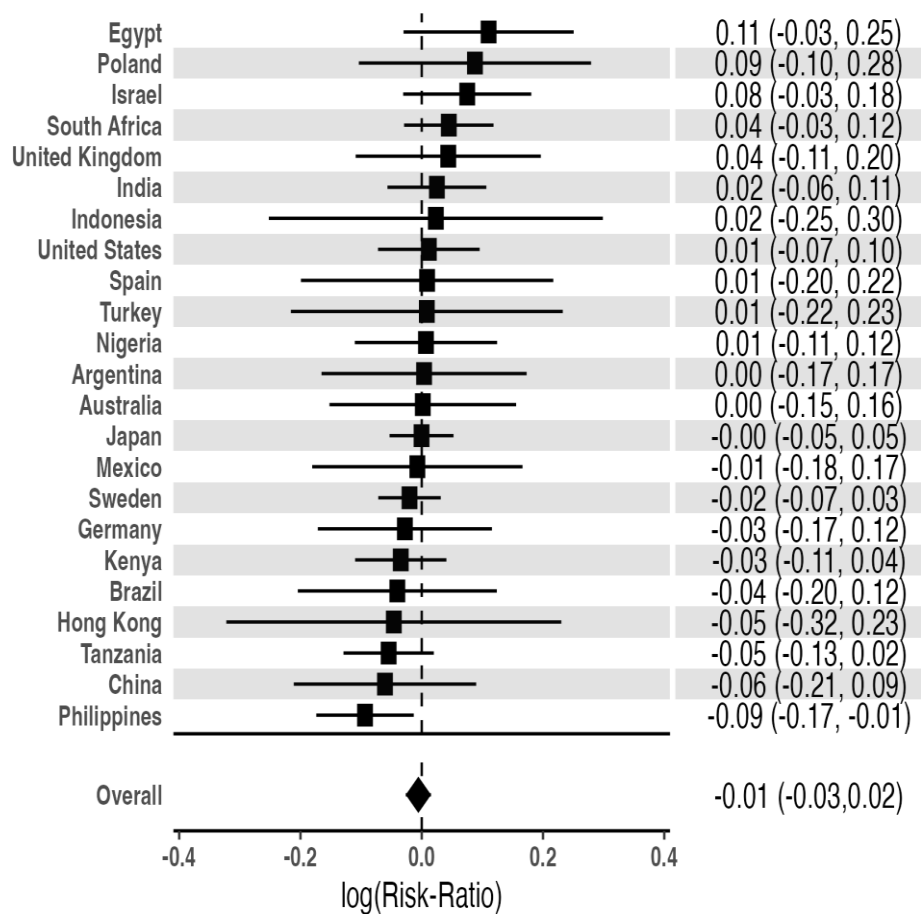

Figure S15. Forest plot of the effects of Your health when growing up Very good (Ref: Good) predicting experienced beauty

Your health when growing up (Very good) predicting experienced beauty  
(Ref: Good)

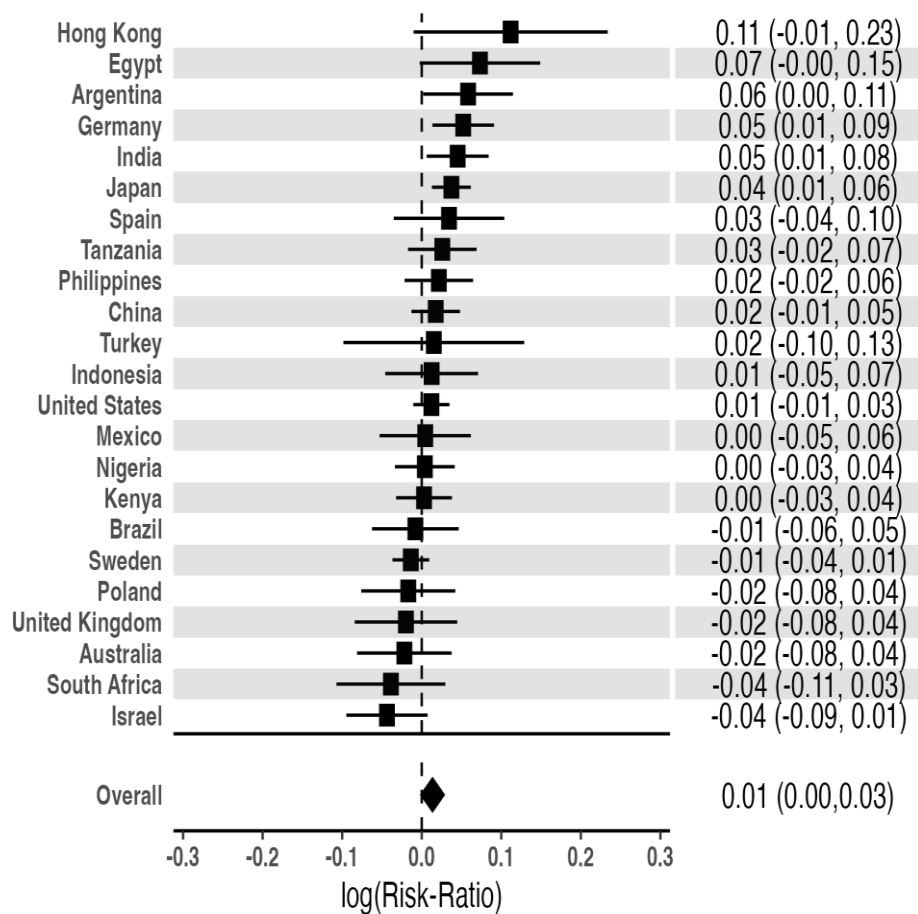

$\tau = 0.017$ ; Q-profile 95% CI [0.000, 0.031];  $Q(df=22)=35.26$ ,  $p=3.64e-02$ ;  $I^2=37.97$ ;

Figure S16. Forest plot of the effects of Born in This country Born in another country (Ref: Born in this country) predicting experienced beauty

# Born in This country (Born in another country) predicting experienced beauty

(Ref: Born in this country)

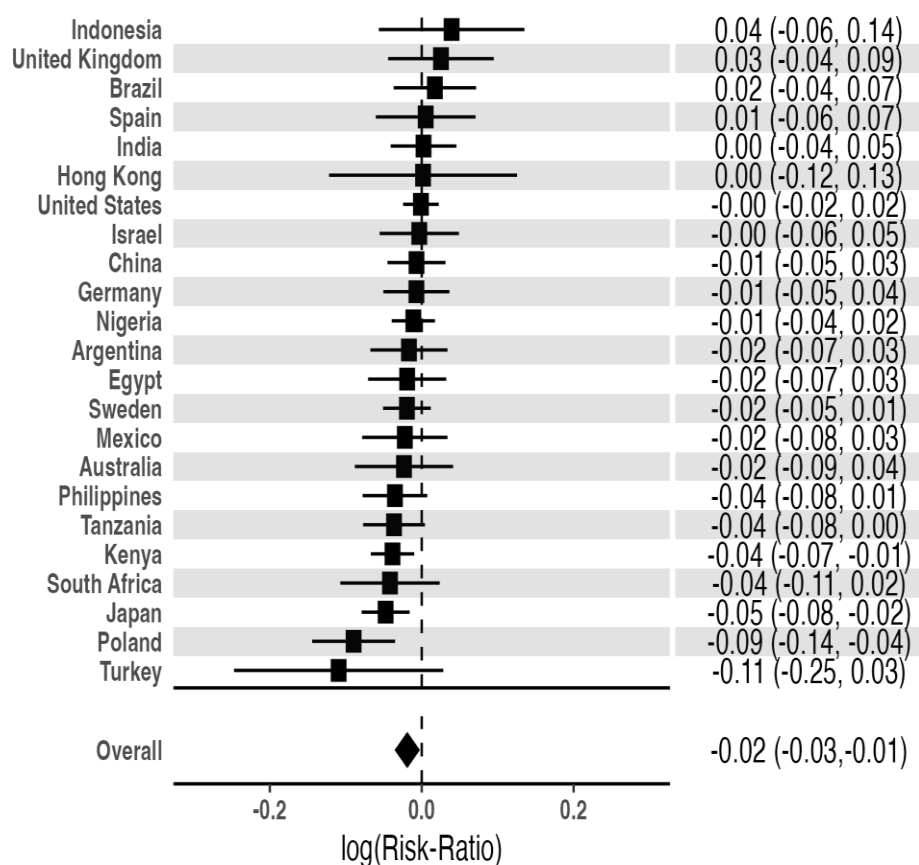

$\tau = 0.009$ ; Q-profile 95% CI [0.000, 0.022];  $Q(df=22)=24.61$ ,  $p=3.16e-01$ ;  $I^2=13.90$ ;

Figure S17. Forest plot of the effects of How Often You Attended Religious Services or Worshipped When You Were Around 12 Years Old At least once a week (Ref: Never) predicting experienced beauty

How Often You Attended Religious Services or Worshipped When You Were Around 12 Years Old (At least once a week) predicting experienced beauty

(Ref: Never)

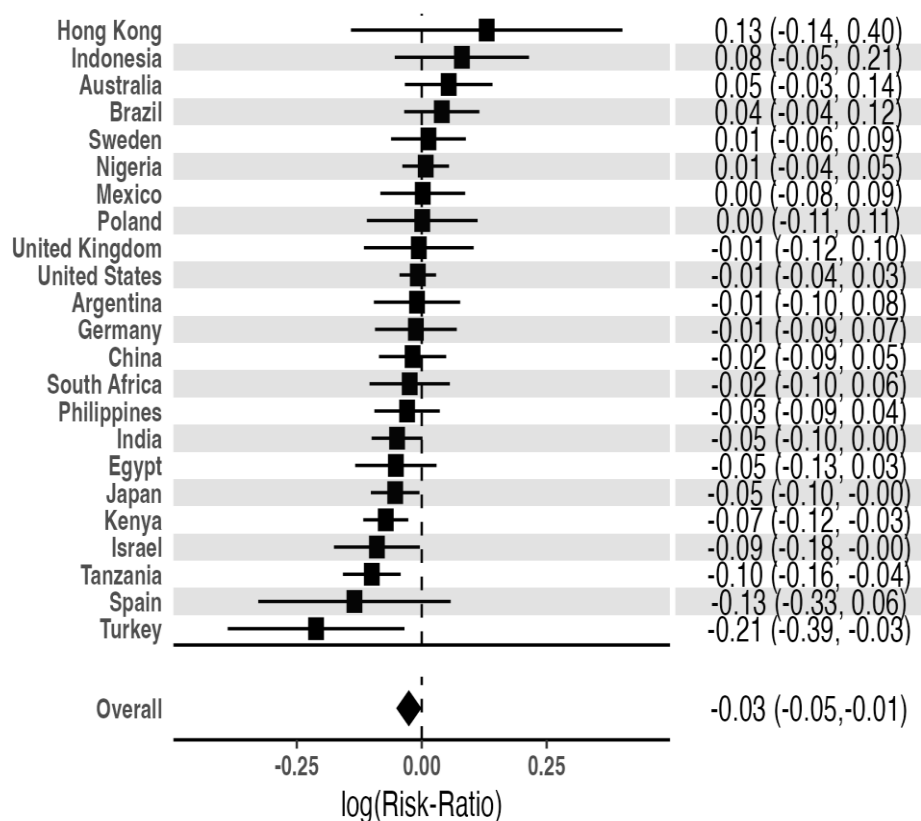

$\tau=0.029$ ; Q-profile 95% CI [0.000, 0.050];  $Q(df=22)=35.17$ ,  $p=3.72e-02$ ;  $I^2=40.07$ ;

Figure S18. Forest plot of the effects of How Often You Attended Religious Services or Worshipped When You Were Around 12 Years Old Less than once a month (Ref: Never) predicting experienced beauty

How Often You Attended Religious Services or Worshiped When You Were Around 12 Years Old (Less than once a month) predicting experienced beauty

(Ref: Never)

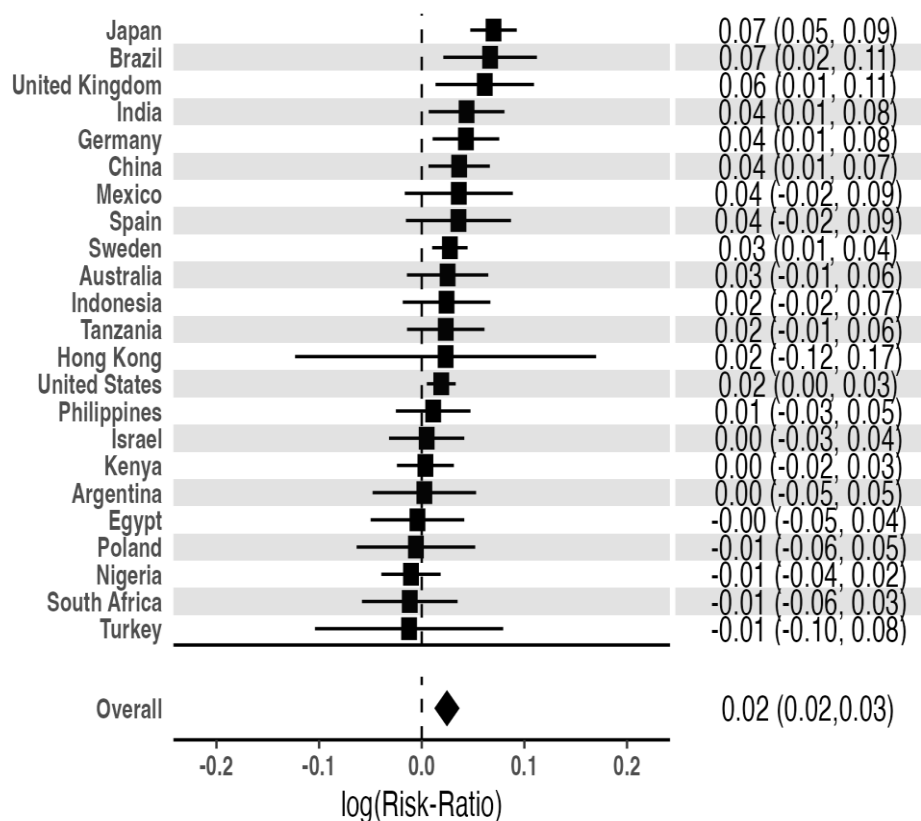

$\tau = 0.014$ ; Q-profile 95% CI [0.009, 0.028];  $Q(df=22)=40.65$ ,  $p=9.07e-03$ ;  $I^2=39.38$ ;

Figure S19. Forest plot of the effects of How Often You Attended Religious Services or Worshiped When You Were Around 12 Years Old One to three times a month (Ref: Never) predicting experienced beauty

How Often You Attended Religious Services or Worshiped When You Were Around 12 Years Old (One to three times a month) predicting experienced beauty

(Ref: Never)

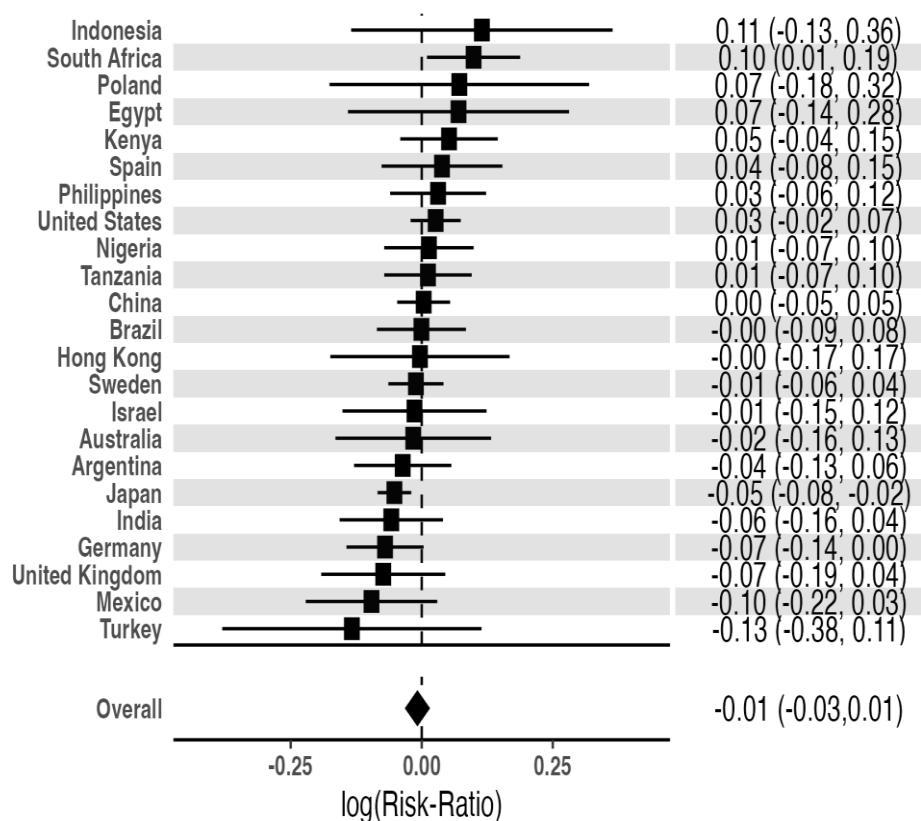

$\tau = 0.017$ ; Q-profile 95% CI [0.000, 0.052]; Q(df=22)=28.26,  $p = 1.67e-01$ ;  $I^2 = 15.12$ ;

Figure S20. Forest plot of the effects of Year of birth (age group) 1943 or earlier (current age: 80+ years) (Ref: 1998-2005; current age: 18-24) predicting experienced beauty

Year of birth (age group) (1943 or earlier (current age: 80+ years))  
predicting experienced beauty  
(Ref: 1998-2005; current age: 18-24)

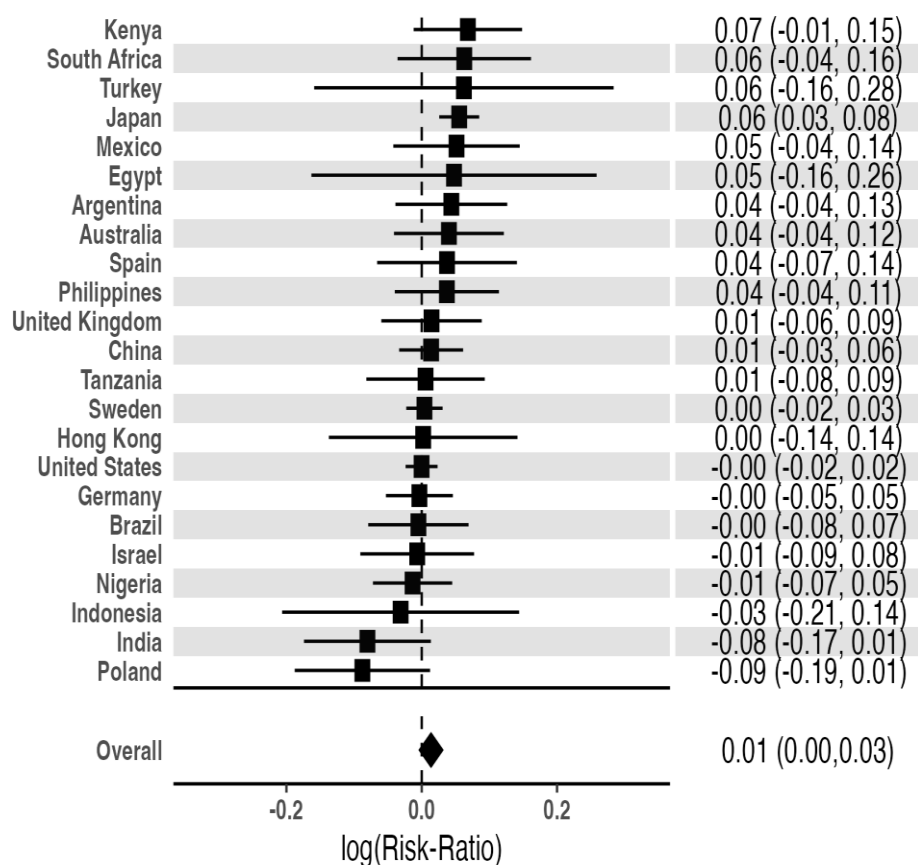

$\tau = 0.009$ ; Q-profile 95% CI [0.000, 0.036];  $Q(df=22)=24.50$ ,  $p=3.22e-01$ ;  $I^2=9.00$ ;

Figure S21. Forest plot of the effects of Year of birth (age group) 1943-1953 (current age: 70-79 years) (Ref: 1998-2005; current age: 18-24) predicting experienced beauty

Year of birth (age group) (1943-1953 (current age: 70-79 years))  
 predicting experienced beauty  
 (Ref: 1998-2005; current age: 18-24)

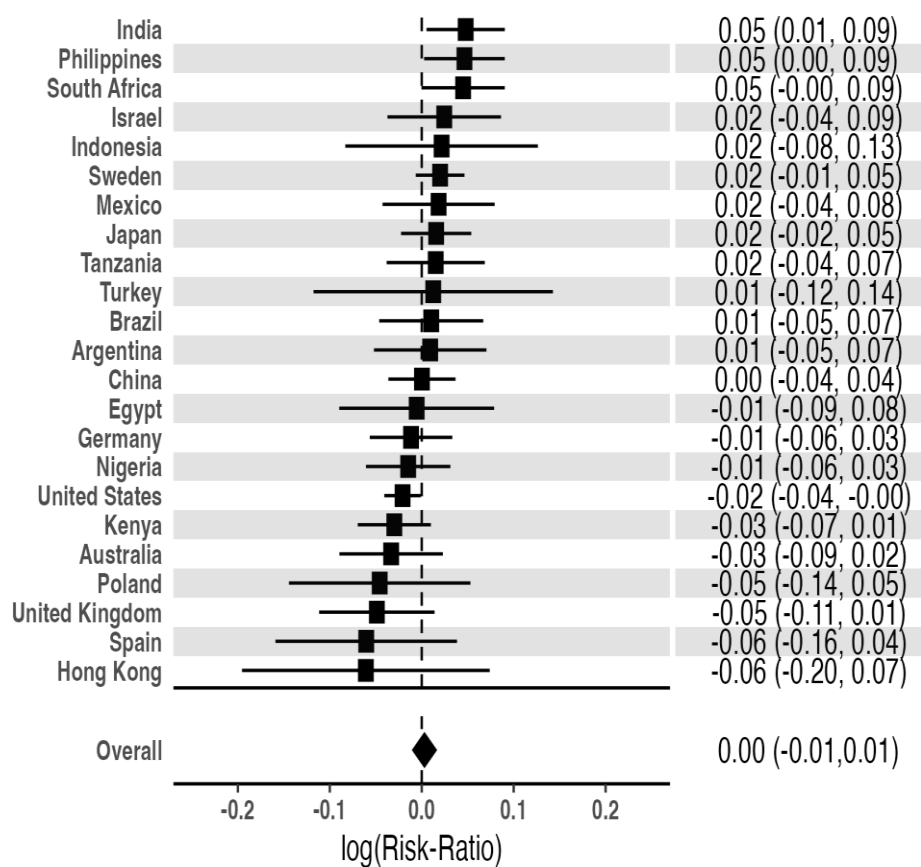

$\tau = 0.014$ ; Q-profile 95% CI [0.000, 0.031];  $Q(df=22)=31.15$ ,  $p=9.31e-02$ ;  $I^2=24.37$ ;

Figure S22. Forest plot of the effects of Year of birth (age group) 1953-1963 (current age: 60-69 years) (Ref: 1998-2005; current age: 18-24) predicting experienced beauty

Year of birth (age group) (1953-1963 (current age: 60-69 years))  
predicting experienced beauty  
(Ref: 1998-2005; current age: 18-24)

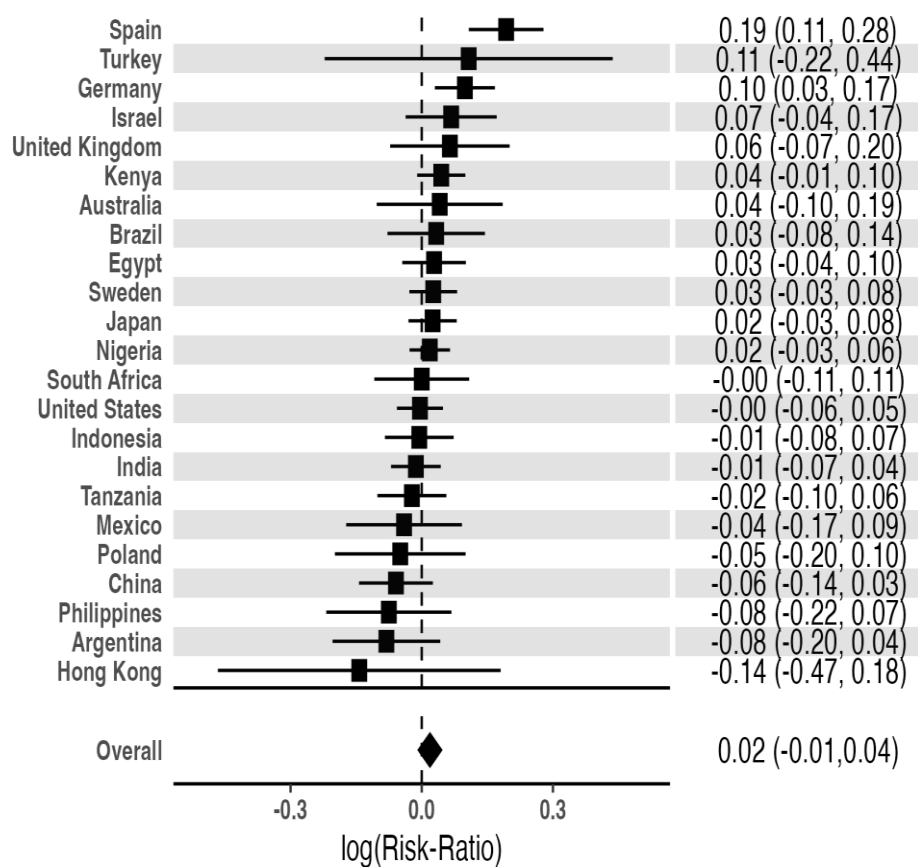

$\tau = 0.037$ ; Q-profile 95% CI [0.000, 0.066];  $Q(df=22)=37.41$ ,  $p=2.13e-02$ ;  $I^2=45.59$ ;

Figure S23. Forest plot of the effects of Year of birth (age group) 1963-1973 (current age: 50-59 years) (Ref: 1998-2005; current age: 18-24) predicting experienced beauty

Year of birth (age group) (1963-1973 (current age: 50-59 years))  
predicting experienced beauty  
(Ref: 1998-2005; current age: 18-24)

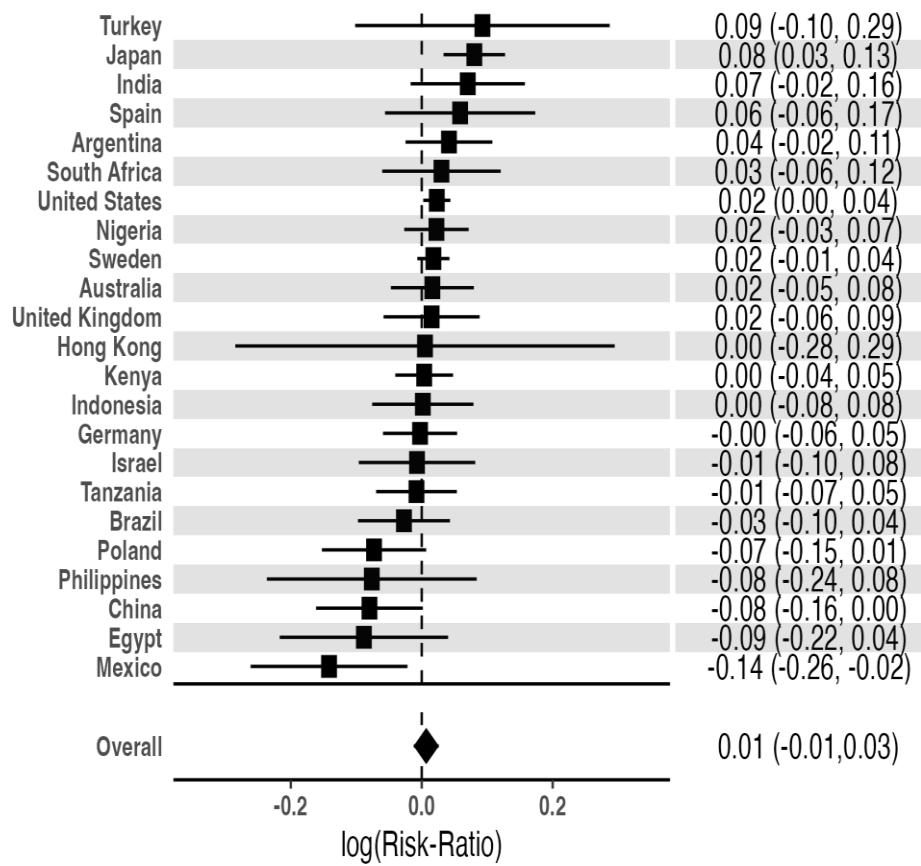

$\tau = 0.029$ ; Q-profile 95% CI [0.000, 0.049];  $Q(df=22)=34.67$ ,  $p=4.2e-02$ ;  $I^2=49.89$ ;

Figure S24. Forest plot of the effects of Year of birth (age group) 1973 -1983 (current age: 40-49 years) (Ref: 1998-2005; current age: 18-24) predicting experienced beauty

Year of birth (age group) (1973-1983 (current age: 40-49 years))  
predicting experienced beauty  
(Ref: 1998-2005; current age: 18-24)

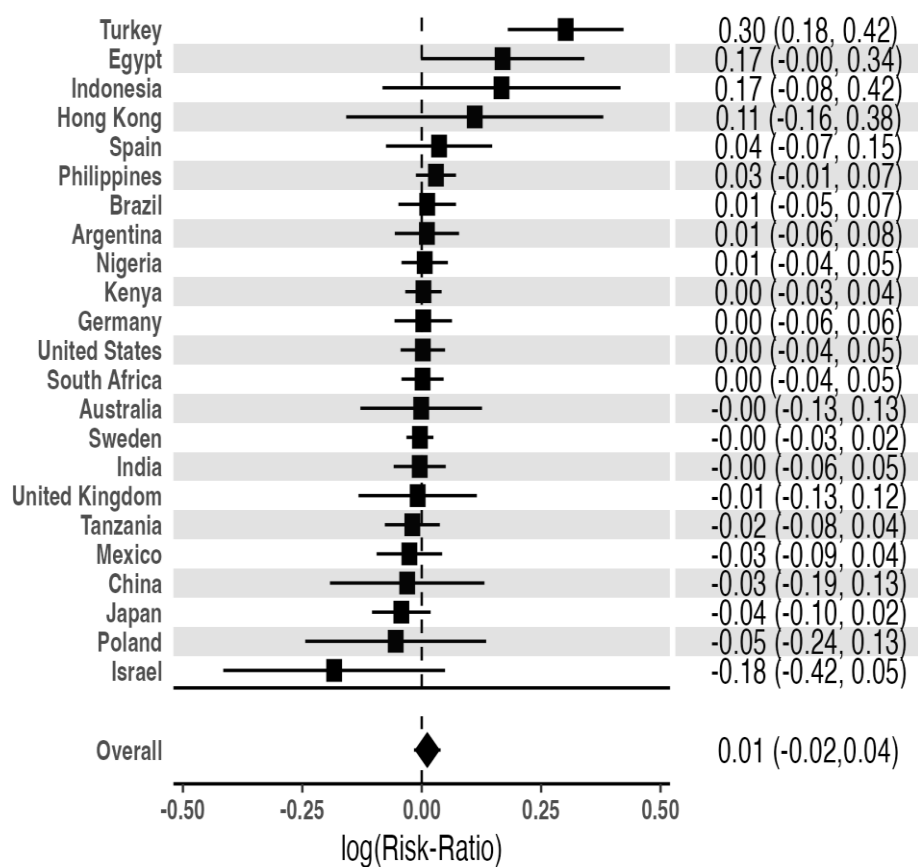

$\tau=0.051$ ; Q-profile 95% CI [0.000, 0.071]; Q(df=22)=38.01,  $p=1.83e-02$ ;  $I^2=72.28$ ;

Figure S25. Forest plot of the effects of Year of birth (age group) 1983 -1993 (current age: 30-39 years) (Ref: 1998-2005; current age: 18-24) predicting experienced beauty

Year of birth (age group) (1983-1993 (current age: 30-39 years))  
predicting experienced beauty  
(Ref: 1998-2005; current age: 18-24)

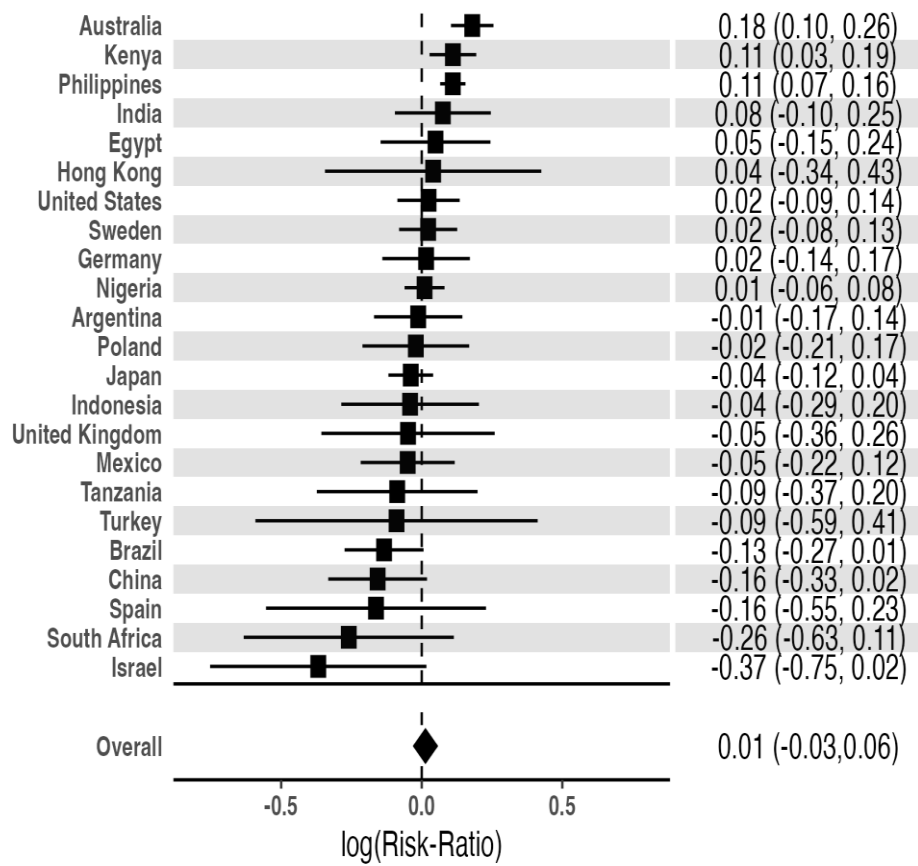

$\tau = 0.063$ ; Q-profile 95% CI [0.037, 0.120]; Q(df=22)=51.98,  $p = 3.15e-04$ ;  $I^2 = 50.49$ ;

Figure S26. Forest plot of the effects of Year of birth (age group) 1993 -1998 (current age: 25-29 years) (Ref: 1998-2005; current age: 18-24) predicting experienced beauty

Year of birth (age group) (1993-1998 (current age: 25-29 years))  
predicting experienced beauty  
(Ref: 1998-2005; current age: 18-24)

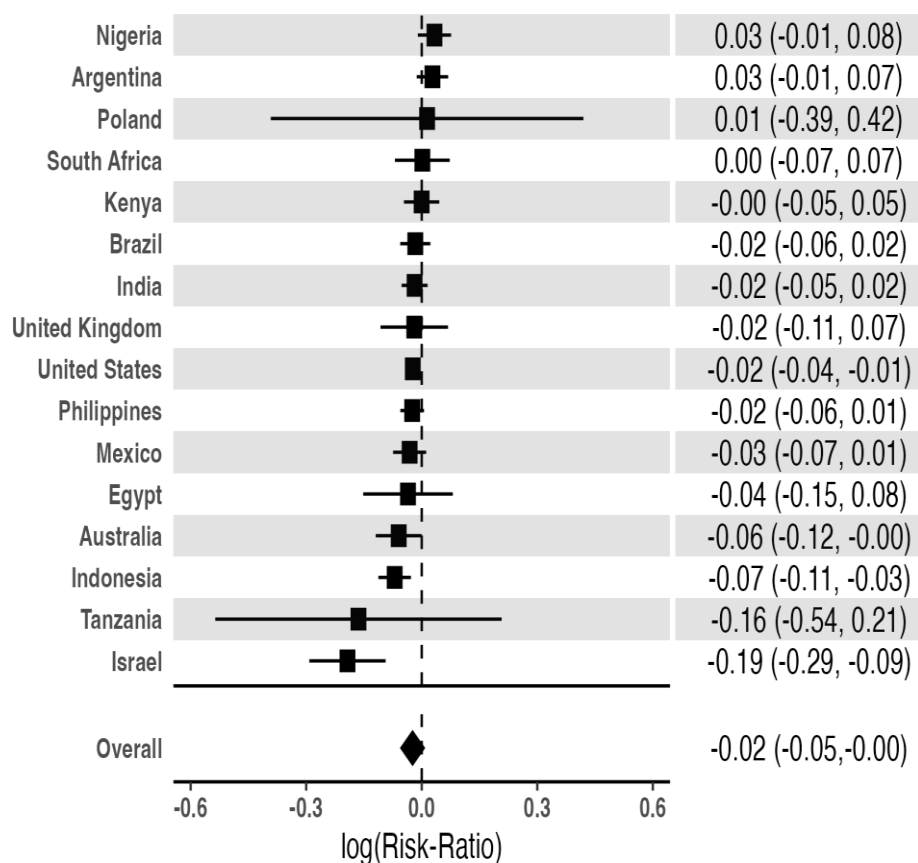

$\tau = 0.033$ ; Q-profile 95% CI [0.000, 0.055]; Q(df=15)=32.16, p=6.12e-03;  $I^2=69.17$ ;  
Excluded countries: Hong Kong, Japan, Germany, Spain, Sweden, Turkey, China

Figure S27. Forest plot of the effects of Religion when twelve years old Christianity (Ref: No religion/Atheist/Agnostic) predicting experienced beauty

# Religion when twelve years old (Christianity) predicting experienced beauty

(Ref: No religion/Atheist/Agnostic)

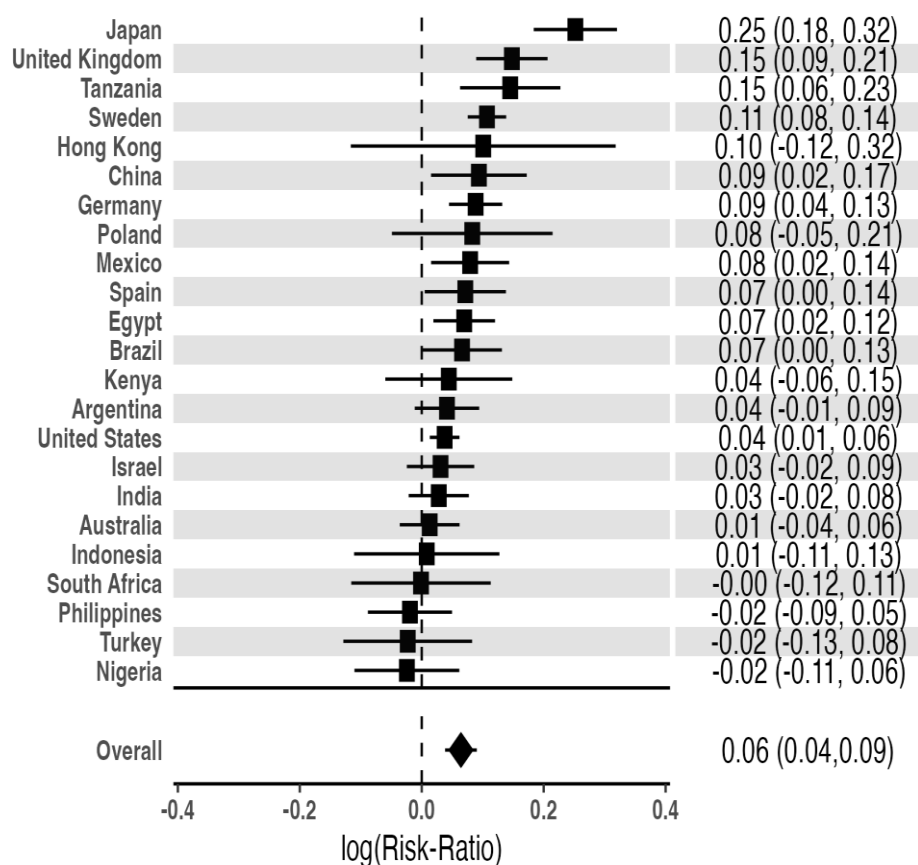

$\tau = 0.052$ ; Q-profile 95% CI [0.031, 0.078]; Q(df=22)=77.48, p=4.19e-08;  $I^2=75.61$ ;

Figure S28. Forest plot of the effects of Religion when twelve years old Collapsed affiliations with prevalence<3% (Ref: No religion/Atheist/Agnostic) predicting experienced beauty

Religion when twelve years old (Collapsed affiliations with prevalence<3%) predicting experienced beauty  
(Ref: No religion/Atheist/Agnostic)

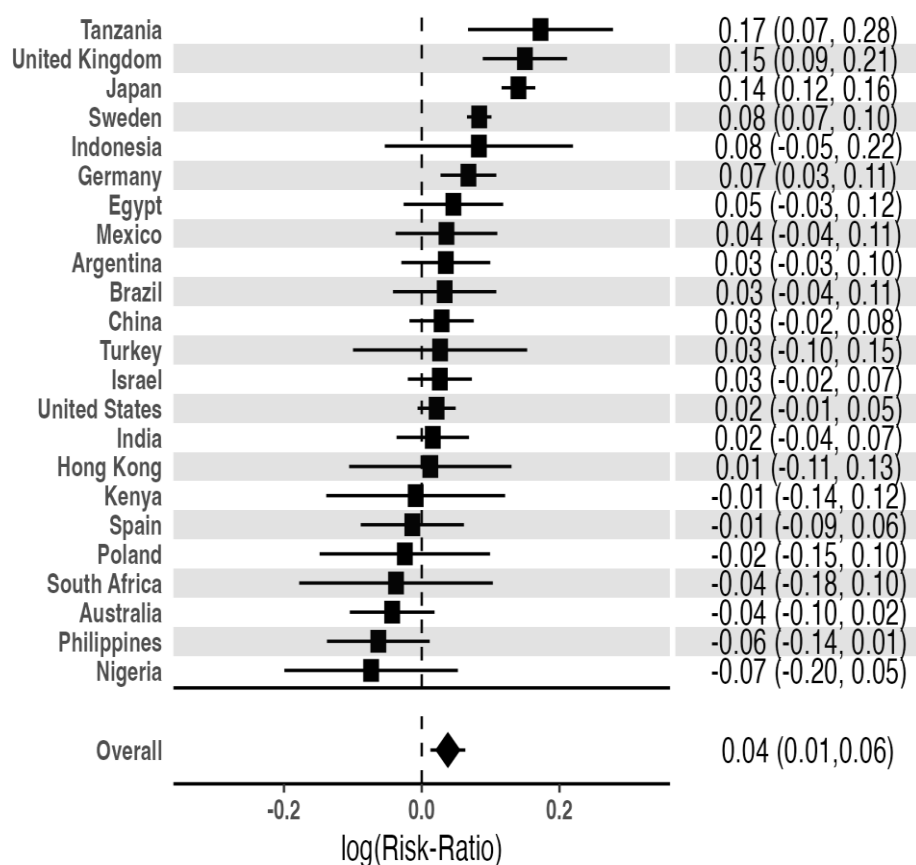

$\tau = 0.049$ ; Q-profile 95% CI [0.032, 0.076]; Q(df=22)=110.57, p=8.71e-14;  $I^2=78.27$ ;

Figure S29. Forest plot of the effects of Race plurality (prominent race/ethnic group [0] or not [1]) Non-plurality groups (Ref: Plurality group) predicting experienced beauty

Race plurality (prominent race/ethnic group [0] or not [1])  
 (Non-plurality groups) predicting experienced beauty  
 (Ref: Plurality group)

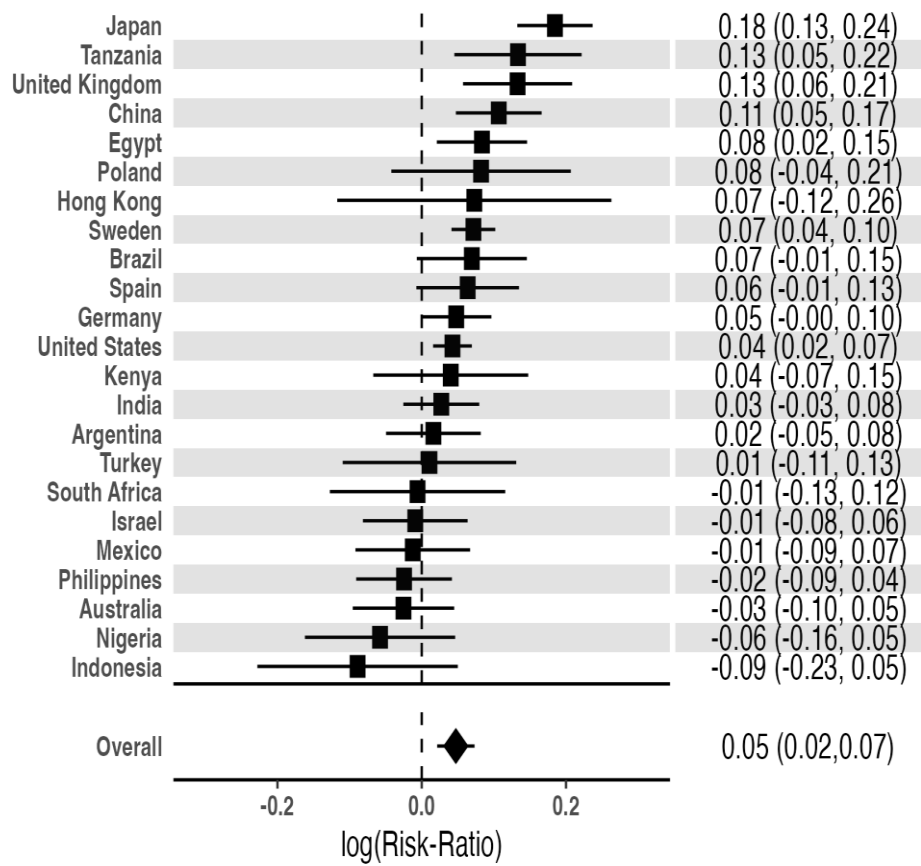

$\tau = 0.049$ ; Q-profile 95% CI [0.029, 0.076]; Q(df=22)=65.87,  $p = 2.91 \times 10^{-6}$ ;  $I^2 = 70.58$ ;
